# Supplementary material for: Health Monitoring via Wearables: Insights from Scientific Publications and Patents (2015–2024)
Source: Research Square preprint supplement (doi:10.21203/rs.3.rs-8742689/v1), 2026-02-04
Supplement: Supplementary file 1 [file 71c985bc736d028a187247b6.xlsx]

## Sheet: Sheet1
#	Jurisdiction	Kind	Display Key	Lens ID	Publication Date	Publication Year	Application Number	Application Date	Priority Numbers	Earliest Priority Date	Title	Abstract	Applicants	Inventors	Owners	URL	Document Type	Has Full Text	Cites Patent Count	Cited by Patent Count	Simple Family Size	Simple Family Members	Simple Family Member Jurisdictions	Extended Family Size	Extended Family Members	Extended Family Member Jurisdictions	Sequence Count	CPC Classifications	IPCR Classifications	US Classifications	NPL Citation Count	NPL Resolved Citation Count	NPL Resolved Lens ID(s)	NPL Resolved External ID(s)	NPL Citations	Legal Status	X
1	US	B2	US 11331009 B2	192-287-206-603-215	44698	2022	US 201815913714 A	43165	US 201815913714 A;;US 201762573637 P;;US 201762573124 P	43024	Apparatus for non-invasive sensing of biomarkers in human sweat	Presented herein are devices for collecting and/or channeling a biofluid (e.g., sweat, tears, saliva) and detecting and/or quantifying one or more biomarkers in the biofluid. The one or more biomarkers may include, for example, ions, salts thereof, hormones and/or steroids, proteins, metabolites and organic compounds. In certain embodiments, the devices described herein include a specially design…	XSENSIO SA;;ECOLE POLYTECHNIQUE FED LAUSANNE EPFL	IONESCU MIHAI ADRIAN;;LONGO JOHAN FRÉDÉRIC;;WILDHABER FABIEN PATRICK;;GUÉRIN HOËL MAXIME;;BELLANDO FRANCESCO;;GARCÍA CORDERO ERICK	XSENSIO SA (2018-04-12);;ECOLE POLYTECHNIQUE FEDERALE DE LAUSANNE (EPFL) (2018-03-20)	https://lens.org/192-287-206-603-215	Granted Patent	yes	54	1	5	144-436-786-755-295;;037-173-133-922-876;;188-479-024-990-068;;192-287-206-603-215;;141-156-611-278-743	EP;;US;;WO	5	144-436-786-755-295;;037-173-133-922-876;;188-479-024-990-068;;192-287-206-603-215;;141-156-611-278-743	EP;;US;;WO	0	A61B5/14517;;A61B5/0002;;A61B5/14539;;A61B5/14546;;A61B5/1477;;A61B5/4266;;A61B5/681;;A61B5/6833;;A61B10/0045;;A61B10/0064;;A61B2503/10;;A61B2560/0412;;A61B2562/028;;A61B2562/0285;;G01N33/48707;;G01N33/48792;;A61B5/14517;;A61B5/0002;;A61B5/0004;;A61B5/0022;;A61B5/14539;;A61B5/14546;;A61B5/1477;;A61B5/1486;;A61B5/4266;;A61B5/681;;A61B5/6833;;A61B10/0064;;A61B2503/10;;A61B2560/0412;;A61B2562/028;;A…	A61B5/145;;A61B5/00;;A61B5/1477;;A61B5/1486;;A61B10/00;;B01L3/00;;G01N27/07;;G01N33/487		32	25	018-231-930-647-524;;133-343-728-273-368;;109-468-490-362-967;;041-984-892-877-133;;035-790-997-414-132;;076-819-830-896-014;;036-198-756-369-063;;057-058-378-163-11X;;139-296-398-866-003;;038-245-584-298-183;;084-847-930-679-410;;061-798-155-260-957;;018-410-857-745-964;;000-432-103-737-996;;094-420-329-633-446;;003-557-397-829-148;;097-073-358-871-852;;114-078-819-019-855;;047-516-865-305-173;;…	pmc1769313;;14624612;;10.1021/ja0354566;;10.1109/estc.2016.7764510;;pmc5353720;;28294122;;10.1038/srep44409;;10.1109/iedm.2017.8268413;;10.1109/memsys.2017.7863417;;10.1038/nature05061;;16871206;;10.1109/icsens.2016.7808470;;10.1038/nature16521;;26819044;;pmc4996079;;10.1109/iedm.2016.7838363;;10.1109/essderc.2016.7599683;;10.1002/elan.201600018;;23675869;;10.1021/ac401085c;;26186151;;10.1016/j.b…	Song, H. and Ismagilov, R. F., Millisecond Kinetics on a Microfluidic Chip Using Nanoliters of Reagents, Journal of the American Chemical Society, 125(47):14613-14619 (2003).;;International Search Report, International Application No. PCT/EP2018/077793 (Apparatus for Non-Invasive Sensing of Biomarkers in Human Sweat, filed Oct. 11, 2018), issued by ISA/European Patent Office, 6 pages, dated Jun. …	ACTIVE	X
2	US	B2	US 9724023 B2	112-656-034-474-179	42955	2017	US 201514676983 A	42096	US 201514676983 A;;US 201461978134 P	41739	Wearable metabolic physical activity monitor and method	A metabolic physical activity monitor measures metabolic analyte data using one or more wearable analyte sensors. The sensors may be incorporated into a self-contained device or communicatively coupled to an external computing device like a smartphone or computer or both. Sensors may be mounted on any body surface including the skin, under the eyelid or in the mouth. Metabolic Analyte biomarker d…	MISSION BIOMEDICAL SCIENT INC	SWENSON FRANCIS JOSEPH	MISSION BIOMEDICAL SCIENTIFIC INC (2015-04-01)	https://lens.org/112-656-034-474-179	Granted Patent	yes	7	10	2	087-547-859-521-462;;112-656-034-474-179	US	2	087-547-859-521-462;;112-656-034-474-179	US	0	A61B5/14539;;A61B5/0002;;A61B5/14507;;A61B5/14517;;A61B5/14546;;A61B5/1455;;A61B5/4866;;A61B5/681;;A61B5/688;;A61B5/14539;;A61B5/0002;;A61B5/14507;;A61B5/14517;;A61B5/14546;;A61B5/1455;;A61B5/4866;;A61B5/681;;A61B5/688	A61B5/1455;;A61B5/00;;A61B5/145		8	6	089-227-903-449-307;;024-200-274-821-234;;018-044-209-124-353;;060-710-550-556-496;;132-486-808-089-968;;005-165-885-913-605	10.1016/0925-4005(93)85270-k;;pmc2769664;;10.1177/193229680700100522;;19885145;;20470945;;10.1016/j.arcmed.2010.02.006;;12702473;;16864974;;10.1159/000094670;;21131188;;10.1016/j.rmed.2010.11.010	Swenson, Frank J., “Development and evaluation of optical sensors for the detection of bacteria”, Sensors and Actuators B, 11 (1993), pp. 315-321.;;Andre, et al., “Recent Advances in Free-Living Physical Activity Monitoring: A Review”, Journal of Diabetes Science and Technology, vol. 1, Issue 5, Sep. 2007, 8 pages.;;Chang, Byoung-Yong, “Smartphone-based Chemistry Instrumentation: Digitization of …	ACTIVE	X
3	US	B2	US 11547326 B2	006-816-373-870-325	44936	2023	US 201916431326 A	43620	US 201916431326 A;;US 201862680228 P	43255	Identification, quantitation and analysis of unique biomarkers in sweat	A biomarker diagnostic system includes a sensor to collect a sweat sample from a biological subject; a processor operatively connected to the sensor, wherein the processor is configured to perform metabolic and proteomic profiling of biomarkers in the sweat sample. The metabolic and proteomic profile is compared to a predetermined profile of the biomarkers and to determine a physiological status …	US GOV AIR FORCE;;US AIR FORCE	HARSHMAN SEAN W;;QUALLEY ANTHONY V;;SCHAEUBLIN NICOLE M;;MARTIN JENNIFER A;;GRIGSBY CLAUDE C;;PITSCH RHONDA L	THE GOVERNMENT OF THE UNITED STATES AS REPRSENTED BY THE SECRETARY OF THE AIR FORCE (2019-05-15)	https://lens.org/006-816-373-870-325	Granted Patent	yes	6	0	3	199-607-835-578-678;;190-986-484-424-268;;006-816-373-870-325	US	3	190-986-484-424-268;;199-607-835-578-678;;006-816-373-870-325	US	0	A61B5/14517;;A61B5/4866;;A61B5/4875;;A61B5/6802;;A61B5/7275;;G01N33/6842;;G16B40/30;;G16H50/30;;A61B5/14517;;A61B5/4866;;A61B5/4875;;A61B5/6802;;A61B5/7275;;G01N33/6848;;G01N2560/00;;G16B40/00	A61B5/1455;;A61B5/00;;A61B5/145;;G01N33/68;;G16B40/00		2	2	002-965-631-869-196;;087-860-871-821-506	10.1186/1550-2783-8-s1-p9;;10.1021/pr2007957;;pmc3703649;;22256890	Lee, Douglas P, et al. “Global Untargeted Metabolic Profiling of Human Sweat from Exercising Men and Women.” Journal of the International Society of Sports Nutrition, vol. 8, No. S1, 2011, doi:10.1186/1550-2783-8-s1-p9. (Year: 2011).;;Raiszadeh, Michelle M., et al. “Proteomic Analysis of Eccrine Sweat: Implications for the Discovery of Schizophrenia Biomarker Proteins.” Journal of Proteome Resear…	ACTIVE	X
4	US	B2	US 10835130 B2	196-844-836-085-12X	44152	2020	US 201514977032 A	42359	KR 20140184966 A	41992	Noninvasive blood glucose measurement method and apparatus	A blood glucose measurement apparatus includes: a control unit configured to determine a user's blood glucose level based on a concentration of body fluid secreted from the user; and a biometric information acquisition unit configured to acquire biometric information indicating a status of a user's autonomic nervous system. The control unit is configured to correct the determined blood glucose le…	SAMSUNG ELECTRONICS CO LTD	CHO CHUL-HO;;KIM KWANG-BOK;;CHO SEONG-JE;;LEE SEUNG-MIN;;LEE JEONG-GUN;;JUNG SUN-TAE;;CHO JAE-GEOL	SAMSUNG ELECTRONICS CO. LTD (2015-12-15)	https://lens.org/196-844-836-085-12X	Granted Patent	yes	139	4	6	044-963-974-910-503;;146-254-276-843-354;;149-057-498-575-179;;036-872-475-821-481;;196-844-836-085-12X;;031-321-125-349-815	CN;;KR;;US;;WO	6	146-254-276-843-354;;044-963-974-910-503;;149-057-498-575-179;;036-872-475-821-481;;196-844-836-085-12X;;031-321-125-349-815	CN;;KR;;US;;WO	0	G01N33/66;;A61B5/0024;;A61B5/0205;;A61B5/14532;;A61B5/4035;;A61B5/4261;;A61B5/4266;;A61B5/4277;;A61B10/0051;;A61B10/0064;;A61B10/007;;A61B5/0024;;A61B3/101;;A61B3/112;;A61B5/01;;A61B5/0205;;A61B5/02416;;A61B5/0533;;A61B5/082;;A61B5/14532;;A61B5/4035;;A61B5/4261;;A61B5/4266;;A61B5/4277;;A61B10/0051;;A61B10/0064;;A61B10/007;;A61B2010/0067;;A61B5/145;;A61B5/01;;A61B5/024;;A61B5/053;;A61B5/11;;G01N33…	A61B5/0205;;A61B3/10;;A61B3/11;;A61B5/00;;A61B5/01;;A61B5/02;;A61B5/024;;A61B5/053;;A61B5/08;;A61B5/11;;A61B5/145;;A61B10/00		9	1	053-040-095-469-038	8419065;;10.1093/clinchem/39.1.87	International Search Report dated Mar. 28, 2016 corresponding to International Patent Application No. PCT/KR2015/013724.;;Kundu, Samar K. et al., Breath Acetone Analyzer: Diagnostic Tool to Monitor Dietary Fat Loss, Clin. Chem. 39/1, 87-92 (1993).;;Task Force of the European Society of Cardiology and the North American Society of Pacing andElectrophysiology, Heart Rate Variability, European Heart…	ACTIVE	X
5	US	B2	US 11225258 B2	175-059-021-736-440	44579	2022	US 202017099149 A	44151	JP 2018094852 A;;JP 2018094853 A;;JP 2018094854 A;;JP 2018094863 A;;JP 2018094864 A;;JP 2019019557 W	43236	Safe driving assistance system	A safe driving assistance system includes a wearable terminal having a terminal identification information, a first and a second sensor acquiring a biometric information of a driver, a safe driving assistance in-vehicle device having a criteria determination unit. The criteria determination unit determines that a blood glucose level is a predetermined number or less and at least one selected the …	SOSAIKOUSEIKAI CLINICAL FOUNDATION MATSUNAMI RES PARK	MATSUNAMI HIDETOSHI	SOSAIKOUSEIKAI CLINICAL FOUNDATION MATSUNAMI RESEARCH PARK (2020-10-14)	https://lens.org/175-059-021-736-440	Granted Patent	yes	15	5	3	017-732-088-627-335;;175-059-021-736-440;;105-131-314-716-501	US;;WO	9	051-376-712-383-616;;185-786-373-271-281;;016-889-441-210-047;;017-732-088-627-335;;175-059-021-736-440;;122-364-783-588-673;;085-405-887-942-348;;105-131-314-716-501;;158-458-896-140-49X	JP;;US;;WO	0	A61B5/02055;;A61B5/01;;A61B5/02438;;A61B5/14532;;A61B5/18;;A61B5/4266;;A61B5/681;;B60K28/06;;B60Q1/52;;B60W50/14;;B60W60/0016;;B60W60/0051;;B60W2050/143;;B60W2050/146;;B60W2540/221;;B60W2540/26;;B60Y2302/05;;G08B21/00;;G08B25/04;;G08G1/09;;G08G1/16;;B60W40/08;;A61B5/02055;;A61B5/14532;;A61B5/4266;;B60Q1/46;;B60Q5/005;;B60W50/12;;B60W50/14;;B60W2540/221;;B60W2540/26	B60Q1/00;;A61B5/00;;A61B5/0205;;A61B5/145;;B60Q1/46;;B60Q5/00;;B60W40/08;;B60W50/12;;B60W50/14		6	0			International Search Report and Written Opinion for International Application No. PCT/JP2019/019557, filed May 16, 2018, dated Aug. 20, 2019.;;Study Session in Ministry of Land, Infrastructure, Transport and Tourism on Study Session On Utilization Of Biological Data For Driver Abnormality Detection And Automatic Control Technology Through Medical-engineering Collaboration, Nov. 17, 2017.;;Study S…	ACTIVE	X
6	US	B2	US 11389087 B2	034-215-140-782-422	44761	2022	US 201916448587 A	43637	US 201916448587 A;;US 201715839957 A;;US 201715487046 A;;US 201615177703 A;;US 201615019006 A;;US 201715442305 A;;US 201615177686 A;;US 201615014526 A;;US 201615177667 A;;US 201615040319 A;;US 201562130047 P;;US 201562130039 P;;US 201562130030 P	42072	Device for measuring biological fluids	A flexible, multi-layered device for automatically sensing sweat biomarkers, storing and transmitting sensed data via wireless network to a computing device having software applications operable thereon for receiving and analyzing the sensed data. The device is functional in extreme conditions, including extremely hot temperatures, extremely cold temperatures, high salinity, high altitude, extrem…	CORESYTE INC	NYBERG STEN ADAM;;PONT DALTON;;PIZER ADAM;;CHIOCHETTI JOHN V	KEY ELECTRONICS INC (2016-02-03);;CORESYTE INC (2015-02-04)	https://lens.org/034-215-140-782-422	Granted Patent	yes	40	0	2	034-215-140-782-422;;179-850-949-068-857	US	27	111-148-440-450-001;;128-865-561-738-107;;198-905-021-543-096;;140-799-414-937-060;;103-609-665-437-819;;112-502-057-714-882;;024-664-370-011-210;;057-804-700-054-408;;195-672-532-303-98X;;166-798-314-462-458;;163-313-377-777-871;;146-616-795-714-365;;030-079-711-002-938;;189-678-741-994-721;;179-850-949-068-857;;034-215-140-782-422;;048-050-240-555-388;;078-256-384-224-926;;044-621-174-390-722;;…	US;;WO	0	A61B10/0064;;A61B5/0537;;A61B5/1468;;A61B5/1477;;A61B5/4266;;A61B5/4875;;A61B5/6833;;A61B2560/0223;;A61B5/14517;;A61B5/0017;;A61B5/14546;;A61B5/1477;;A61B5/4266;;A61B5/6833;;A61B10/0064;;A61B2560/0252;;A61B2562/164	A61B5/145;;A61B5/00;;A61B5/1477;;A61B10/00		15	6	027-642-029-392-381;;092-959-417-592-249;;119-487-444-286-146;;026-700-508-196-069;;037-086-942-565-631;;114-206-043-258-624	10.4085/1062-6050-43.2.184;;18345344;;pmc2267333;;10.1109/mspec.2014.6934933;;10.1109/embc.2014.6943929;;25570297;;9303999;;pmc438784;;10.1172/jci103245;;13278407;;10.1063/1.4921039;;26045728;;pmc4433483	U.S. Appl. No. 62/003,675, filed May 28, 2015, University of Cincinnati.;;U.S. Appl. No. 62/003,707, filed May 28, 2015, University of Cincinnati.;;Heikenfeld, J. C., Advanced Sweat Sensor Adhesion, Hermetic, and Fluidic Strategies, U.S. Appl. No. 62/023,233, Provisional Patent Application filed Jul. 11, 2014; Entire Document.;;Godek, “Sweat Rates and Fluid Turnover in Professional Football Playe…	ACTIVE	X
7	US	B2	US 10258262 B2	195-998-392-183-671	43571	2019	US 201615362303 A	42702	US 201615362303 A;;US 2015/0055756 W;;US 201462064009 P	41927	Sweat sensing device communication security and compliance	The invention addresses confounding difficulties involving continuous sweat analyte measurement. Specifically, the present invention provides: at least one component capable of monitoring whether a sweat sensing device is in sufficient contact with a wearer's skin to allow proper device operation; at least one component capable of monitoring whether the device is operating on a wearer's skin; at …	ECCRINE SYSTEMS INC;;UNIV OF CINCINNATI A UNIV OF THE STATE OF OHIO	HEIKENFELD JASON;;ROSE DANIEL P;;PAPAUTSKY IAN;;KANG WENJING;;WANG XIAO;;RATTERMAN MICHAEL	UNIVERSITY OF CINCINNATI A UNIVERSITY OF THE STATE OF OHIO (2017-08-01)	https://lens.org/195-998-392-183-671	Granted Patent	yes	61	1	16	078-036-253-276-06X;;069-230-308-855-038;;013-782-743-781-399;;112-362-912-332-673;;094-164-257-775-508;;183-477-601-393-319;;119-385-967-643-635;;189-727-578-453-770;;021-499-046-366-292;;195-998-392-183-671;;029-946-400-901-343;;001-883-340-842-027;;196-556-062-843-743;;017-686-184-936-504;;191-537-821-830-682;;142-249-795-569-340	CN;;EP;;US;;WO	16	078-036-253-276-06X;;069-230-308-855-038;;013-782-743-781-399;;112-362-912-332-673;;094-164-257-775-508;;183-477-601-393-319;;119-385-967-643-635;;189-727-578-453-770;;021-499-046-366-292;;195-998-392-183-671;;029-946-400-901-343;;001-883-340-842-027;;196-556-062-843-743;;017-686-184-936-504;;191-537-821-830-682;;142-249-795-569-340	CN;;EP;;US;;WO	0	A61B5/6843;;A61B5/0002;;A61B5/024;;A61B5/0531;;A61B5/0533;;A61B5/112;;A61B5/14517;;A61B5/14546;;A61B5/14551;;A61B5/4266;;A61B5/4833;;A61B5/4845;;A61B5/7275;;A61B5/746;;A61B2562/0214;;A61B2562/08;;G16Z99/00;;G16Z99/00;;A61B5/0002;;A61B5/024;;A61B5/0531;;A61B5/0533;;A61B5/112;;A61B5/14517;;A61B5/14546;;A61B5/14551;;A61B5/4266;;A61B5/4833;;A61B5/4845;;A61B5/6843;;A61B5/7275;;A61B5/746;;A61B2562/0214…	A61B5/1468;;A61B5/00;;A61B5/0205;;A61B5/024;;A61B5/053;;A61B5/11;;A61B5/117;;A61B5/145;;A61B5/1455;;A61B5/1477;;B05D1/30;;B05D3/00;;B32B37/12;;G06K9/00;;G06N5/04;;G16H50/20;;G16Z99/00;;H04L29/08;;H04Q9/00		19	7	041-736-270-492-623;;069-300-893-727-539;;092-959-417-592-249;;006-365-522-191-693;;002-056-923-004-479;;114-206-043-258-624;;022-644-837-253-23X	19541738;;10.1152/japplphysiol.00197.2009;;20300678;;pmc3228840;;10.1039/b919614e;;10.1109/mspec.2014.6934933;;10.1109/tbme.2014.2369991;;25398174;;3544873;;10.1152/ajpregu.1987.252.1.r181;;10.1063/1.4921039;;26045728;;pmc4433483;;23849497;;10.1186/2046-7648-2-4;;pmc3710196	U.S. Appl. No. 15/362,299 , Non-Final Office Action, dated Mar. 10, 2017, 8 pages.;;U.S. Appl. No. 15/362,229, Non-Final Office Action, dated Mar. 24, 2017, 13 pages.;;Baker, et al. “Comparison of regional patch collection vs. whole body washdown for measuring sweat sodium and potassium loss during exercise”, The American Physiological Society, pp. 887-895, 2009.;;Fu, et al., “Controlled reagent …	ACTIVE	X
8	US	B1	US 11723563 B1	016-862-050-129-380	45153	2023	US 202017018985 A	44085	US 202017018985 A	44085	Correcting for emitted light wavelength variation in blood-oxygen saturation measurements at wearable electronic device	A measurement engine of a wearable electronic device may compensate for wavelength variations of light emitted as part of blood-oxygen saturation measurements. In some cases, determining an estimated blood-oxygen saturation value is based at least partially on temperature data that may be used to compensate for temperature-based wavelength variations of the emitted light, drive current data that …	APPLE INC	SHAGA RAVI K;;MANNHEIMER PAUL D;;YU THEODORE	APPLE INC (2020-09-08)	https://lens.org/016-862-050-129-380	Granted Patent	yes	64	5	3	190-283-318-833-081;;013-256-004-014-604;;016-862-050-129-380	US	3	190-283-318-833-081;;013-256-004-014-604;;016-862-050-129-380	US	0	G01B11/022;;G06T19/006;;A61B5/14552;;A61B5/681;;A61B2560/0252;;A61B2562/0271;;A61B2562/0233;;G01K13/00;;G01S5/16;;G01S11/12;;G06F1/1686;;G06F3/011;;G06F3/0304;;G06F3/0484;;G06F3/04845;;G06F3/048;;G06T7/70;;G06T13/20;;G06T19/006;;G06T19/20;;G06T2200/24;;G06T2219/004;;A61B5/14552;;G01K13/00;;A61B5/1495;;A61B5/7203;;A61B2562/043;;A61B2562/0271;;A61B2562/0238;;A61B2562/046;;A61B5/681;;A61B5/1455;;G06…	A61B5/1455;;A61B5/00;;A61B5/1495;;G01K13/00		5	0			U.S. Appl. No. 16/812,152, filed Mar. 6, 2020, Mehra et al.;;U.S. Appl. No. 17/013,217, filed Sep. 4, 2020, Allec et al.;;U.S. Appl. No. 17/018,920, filed Sep. 11, 2020, Allec et al.;;U.S. Appl. No. 17/020,659, filed Sep. 14, 2020, Duan et al.;;U.S. Appl. No. 17/473,745, filed Sep. 13, 2021, Liu et al.	ACTIVE	X
9	US	B2	US 11076786 B2	019-446-235-385-053	44411	2021	US 201916589437 A	43739	US 201916589437 A;;US 201862739712 P	43374	Wound monitoring sensors and use thereof	The subject invention provides sensor systems that can detect biomarkers related to wound healing (e.g., uric acid, adenosine, arginine and/or xanthine). In one embodiment, the subject invention pertains to materials and methods for monitoring biomarkers non-invasively in a wound and a biofluid (e.g., sweat) in the proximity of the wound, optionally, including other physiological fluids. Skin bas…	CHOUDHURY SOHINI ROY;;UMASANKAR YOGESWARAN;;BHANSALI SHEKHAR;;KIRSNER ROBERT S;;LEV TOV HADAR A;;THE FLORIDA INTERNATIONAL UNIV BOARD OF TRUSTEES;;UNIV MIAMI	CHOUDHURY SOHINI ROY;;UMASANKAR YOGESWARAN;;BHANSALI SHEKHAR;;KIRSNER ROBERT S;;LEV-TOV HADAR A	THE FLORIDA INTERNATIONAL UNIVERSITY BOARD OF TRUSTEES (2019-11-12);;UNIVERSITY OF MIAMI (2019-10-31)	https://lens.org/019-446-235-385-053	Granted Patent	yes	32	0	2	019-446-235-385-053;;023-222-760-358-979	US	2	019-446-235-385-053;;023-222-760-358-979	US	0	A61B5/445;;A61B5/14517;;A61B5/14539;;A61B5/1486;;A61B5/6833;;A61B2560/0412;;A61B5/1486;;A61B5/14507;;A61B5/14539;;A61B5/14546;;A61B5/20;;A61B5/4266;;A61B5/4277	A61B5/1486;;A61B5/00;;A61B5/145;;A61B5/20		22	19	003-820-958-236-955;;078-522-206-115-611;;046-001-784-277-431;;153-297-805-440-31X;;025-119-709-342-071;;019-986-993-619-063;;002-035-536-559-842;;040-105-336-017-079;;029-542-899-998-023;;012-575-832-334-859;;063-082-254-933-706;;060-870-043-658-802;;039-889-677-824-648;;031-616-791-886-362;;001-518-802-490-316;;064-566-202-406-151;;009-582-542-264-888;;055-917-259-776-781;;032-545-630-189-858	pmc3619397;;10.1053/j.ackd.2012.07.009;;23089270;;10.5772/47963;;10.1149/08010.1345ecst;;10.1002/elan.201800360;;10.1109/icsens.2018.8589952;;17212525;;10.1117/1.2388152;;9360612;;10.1038/nsb1197-947;;10.1042/bj3170001;;pmc1217448;;8694749;;10.1016/j.bios.2012.09.029;;23058663;;21973196;;10.1111/j.1742-481x.2011.00870.x;;pmc7951012;;12817713;;13271340;;10.1016/s0021-9258(19)81419-9;;10.1016/j.ijc…	Bobulescu, I.A., et al., “Renal Transport of Uric Acid: Evolving Concepts and Uncertainties.” Adv Chronic Kidney Dis, Nov. 2012, 19(6): 358-371.;;Bonnete, F., “Macromolecular Crystallization Controlled by Colloidal Interactions: The Case of Urate Oxidase.” Crystallization—science and technology. France: InTech-Open Access Company, Sep. 2012, pp. 349-378.;;Borland, L.M., et al., “An Introduction t…	ACTIVE	X
10	US	B2	US 11064946 B2	040-979-361-979-779	44397	2021	US 201515501373 A	42227	US 201515501373 A;;US 201462035823 P;;US 201562142877 P;;US 2015/0044638 W	41862	Devices and related methods for epidermal characterization of biofluids	Skin-mounted or epidermal devices and methods for monitoring biofluids are disclosed. The devices comprise a functional substrate that is mechanically and/or thermally matched to skin to provide durable adhesion for long-term wear. The functional substrates allow for the microfluidic transport of biofluids from the skin to one or more sensors that measure and/or detect biological parameters, such…	UNIV ILLINOIS	ROGERS JOHN A;;KOH AHYEON;;KANG DAESHIK;;LIU YUHAO;;HUANG XIAN	THE BOARD OF TRUSTEES OF THE UNIVERSITY OF ILLINOIS (2015-09-23)	https://lens.org/040-979-361-979-779	Granted Patent	yes	212	6	14	079-547-556-472-122;;147-114-820-024-822;;078-696-492-400-332;;115-364-261-384-215;;040-979-361-979-779;;014-405-562-297-584;;023-621-879-563-505;;066-664-525-653-546;;140-915-559-350-549;;173-909-867-098-740;;109-581-831-945-066;;137-568-350-439-33X;;164-014-966-924-223;;120-324-906-670-02X	CN;;EP;;KR;;JP;;US;;CA;;WO	30	109-806-290-647-668;;147-114-820-024-822;;084-273-353-397-332;;078-696-492-400-332;;195-345-682-211-564;;066-664-525-653-546;;040-979-361-979-779;;016-865-836-904-522;;045-217-408-382-816;;023-621-879-563-505;;153-824-849-081-066;;109-581-831-945-066;;137-568-350-439-33X;;120-324-906-670-02X;;164-014-966-924-223;;155-423-646-778-467;;160-041-988-458-946;;110-963-705-910-216;;079-547-556-472-122;;…	CN;;EP;;KR;;JP;;US;;CA;;WO	0	A61B5/6833;;A61B5/002;;A61B5/0059;;A61B5/0075;;A61B5/1032;;A61B5/14514;;A61B5/14517;;A61B5/14532;;A61B5/14539;;A61B5/14546;;A61B5/1455;;A61B5/1468;;A61B5/1477;;A61B5/4266;;A61B5/6898;;A61B2562/12;;A61B2576/00;;B01L3/502707;;B01L3/505;;G16H30/40;;A61B5/6833;;A61B5/002;;A61B5/0059;;A61B5/0075;;A61B5/01;;A61B5/053;;A61B5/1032;;A61B5/14514;;A61B5/14517;;A61B5/14532;;A61B5/14539;;A61B5/14546;;A61B5/14…	A61B5/00;;A61B5/01;;A61B5/053;;A61B5/103;;A61B5/145;;A61B5/1455;;A61B5/1468;;A61B5/1477;;B01L3/00		329	202	031-234-189-118-893;;074-660-295-972-454;;041-155-124-615-255;;025-031-536-581-720;;042-815-451-424-672;;014-207-670-383-28X;;029-912-861-844-542;;075-565-792-340-416;;025-058-691-132-108;;027-385-111-321-094;;007-902-142-155-989;;093-903-438-086-621;;042-849-371-654-879;;035-946-150-047-478;;030-668-243-515-77X;;019-433-999-583-479;;009-086-281-370-38X;;042-757-094-051-405;;050-667-049-913-441;;…	10.1016/j.snb.2012.06.048;;15605856;;10.1109/tbme.2004.836523;;10.1007/bf00406415;;7235730;;10.1088/0022-3727/45/10/103001;;20459206;;10.1115/1.4001137;;14731246;;10.1111/j.1600-0846.2004.00050.x;;17322588;;10.1088/0967-3334/28/3/r01;;12051308;;10.1088/0967-3334/23/2/312;;10.1115/1.1909207;;10.1080/07315724.2007.10719661;;17921468;;10.1097/00005768-199712000-00017;;9432101;;10.1016/0924-4247(94)8…	Curto, V. F., Fay, C., Coyle, S., Byrne, R., O'Toole, C., Barry, C., . . . & Benito-Lopez, F. (2012). Real-time sweat pH monitoring based on a wearable chemical barcode micro-fluidic platform incorporating ionic liquids. Sensors and Actuators B: Chemical, 171, 1327-1334. (Year: 2012).;;U.S. Appl. No. 11/001,689, filed Dec. 1, 2004, 2006/0286488, Dec. 21, 2006, U.S. Pat. No. 7,704,684, Apr. 27, 20…	ACTIVE	X
11	US	B2	US 9125606 B2	134-153-638-966-450	42255	2015	US 201314135644 A	41628	US 201314135644 A;;EP 13158884 A;;US 201361778580 P	41346	Device and method for determining the blood oxygen saturation of a subject	A device for determining blood oxygen saturation of a subject comprises an interface for receiving a data stream derived from detected electromagnetic radiation emitted or reflected from one or more skin portions of the subject, said data stream comprising a data signal per skin pixel for a plurality of skin pixels of said one or more skin portions. An analyzer determines the change in blood oxyg…	KONINKL PHILIPS ELECTRONICS NV;;KONINKL PHILIPS NV	VERKRUIJSSE WILLEM;;BARTULA MAREK JANUSZ		https://lens.org/134-153-638-966-450	Granted Patent	yes	7	21	17	063-642-559-772-758;;007-227-184-441-063;;172-528-885-435-039;;156-612-336-410-682;;134-153-638-966-450;;113-294-008-508-452;;089-882-008-958-894;;068-614-421-365-387;;047-554-270-079-864;;178-311-078-531-228;;032-853-854-258-298;;194-446-228-637-182;;158-337-425-044-265;;026-585-960-438-422;;174-116-935-352-138;;126-343-512-439-177;;145-190-032-787-863	CN;;EP;;JP;;RU;;US;;CA;;AU;;WO;;BR;;MX;;ZA	17	063-642-559-772-758;;007-227-184-441-063;;172-528-885-435-039;;156-612-336-410-682;;134-153-638-966-450;;113-294-008-508-452;;068-614-421-365-387;;089-882-008-958-894;;047-554-270-079-864;;178-311-078-531-228;;032-853-854-258-298;;194-446-228-637-182;;158-337-425-044-265;;026-585-960-438-422;;174-116-935-352-138;;126-343-512-439-177;;145-190-032-787-863	CN;;EP;;JP;;RU;;US;;CA;;AU;;WO;;BR;;MX;;ZA	0	A61B5/02416;;A61B5/14551;;G06T7/0016;;G06T2207/30076;;G06T2207/30104;;A61B5/02416;;A61B5/14551;;G06T7/0012;;G06T7/0016;;A61B5/14552;;A61B5/02416;;A61B5/14551;;G06T7/0016;;G06T2207/30076;;G06T2207/30104;;G06T7/0012	G06K9/00;;A61B5/024;;A61B5/1455;;G06T7/00		4	4	014-447-311-312-415;;002-764-087-201-748;;131-095-684-477-381;;030-881-603-005-064	10.1117/12.808707;;pmc2717852;;10.1364/oe.16.021434;;19104573;;10.1109/cic.2007.4745594;;10.1007/s10439-005-5763-2;;16133912	Klaessens, J. H. G. M., et al.; Non-invasive skin oxygenation imaging using a multi-spectral camera system: Effectiveness of various concentration algorithms applied on human skin; 2009; SPIE; vol. 7174; 717408-1-13.;;Verkruysse, W., et al.; Remote plethysmographic imaging using ambient light; 2008; Opt Express; 16(26) 21434-21445.;;Wieringa, F. P., et al.; In Vitro Demonstration of an SpO2-Camer…	ACTIVE	X
12	US	B2	US 11304632 B2	184-430-705-427-315	44670	2022	US 201816170632 A	43398	TW 106140073 A	43059	Blood glucose detection device	A blood glucose detection device includes a carrier body, a flow-guiding actuator, a microneedle patch, a sensor and a controlling chip. The carrier body has a liquid guiding channel, a compressing chamber and a liquid storage chamber. The flow-guiding actuator seals the compressing chamber. The microneedle patch is attached on the carrier body and has plural hollow microneedles. The sensor is di…	MICROJET TECHNOLOGY CO LTD	MOU HAO-JAN;;MO LI-PANG;;HUANG CHI-FENG;;HAN YUNG-LUNG;;LEE WEI-MING;;CHEN HSUAN-KAI	MICROJET TECHNOLOGY CO. LTD (2019-01-04)	https://lens.org/184-430-705-427-315	Granted Patent	yes	19	8	7	094-698-457-840-411;;143-980-700-543-439;;164-169-385-008-848;;184-430-705-427-315;;075-396-337-274-002;;173-923-495-521-798;;035-479-519-257-046	EP;;TW;;JP;;US	7	094-698-457-840-411;;143-980-700-543-439;;164-169-385-008-848;;184-430-705-427-315;;075-396-337-274-002;;173-923-495-521-798;;035-479-519-257-046	EP;;TW;;JP;;US	0	A61B5/14514;;A61B5/0002;;A61B5/14532;;A61B5/150022;;A61B5/150083;;A61B5/150099;;A61B5/15087;;A61B5/150969;;A61B5/150984;;A61B5/157;;A61B10/0045;;A61B2010/008;;A61B2562/166;;A61B5/14514;;A61B5/0002;;A61B5/14532;;A61B5/150022;;A61B5/150083;;A61B5/150099;;A61B5/150221;;A61B5/150854;;A61B5/150862;;A61B5/15087;;A61B5/150969;;A61B5/150984;;A61B5/157;;A61B5/4839;;A61B5/685;;A61B10/0045;;A61B2010/008;;A6…	A61B5/145;;A61B5/00;;A61B5/15;;A61B5/157;;A61B10/00		3	1	095-778-620-789-502	10.1007/978-0-387-48998-8_871	Saggere, “Membrane Actuation for Micropumps”, 2008, In: Li D. (Eds.), Encyclopedia of Microfluidics and Nanofluidics (pp. 1078-1082). Boston, MA: Springer. (Year: 2008).;;Extended European Search Report for European Application No. 18202499.2, dated Feb. 18, 2019.;;Indian Office Action for Application No. 201824040265, dated Mar. 12, 2021.	ACTIVE	X
14	US	B2	US 10772552 B2	099-896-130-870-351	44089	2020	US 201815887748 A	43133	US 201815887748 A;;US 201762454284 P	42769	Digital health system for the continuous quantification of physiological biomarkers, biological regulators, and analytes in real-time	A wearable device for the quantification of regulatory substances produced in the body, such as analytes and hormones, is disclosed. The wearable device includes contact sensors formed on an outer portion of a casing of the wearable device, and those contact sensors are positioned to contact skin of a wearer of the device and configured to measure galvanic skin response and temperature. The weara…	BEDELL JR ALFRED H	BEDELL JR ALFRED H		https://lens.org/099-896-130-870-351	Granted Patent	yes	2	5	3	099-896-130-870-351;;020-429-673-470-654;;036-860-953-079-288	US	3	099-896-130-870-351;;020-429-673-470-654;;036-860-953-079-288	US	0	A61B5/165;;A61B5/0004;;A61B5/02055;;A61B5/02416;;A61B5/0533;;A61B5/14546;;A61B5/14552;;A61B5/18;;A61B5/681;;A61B2560/0223;;G01N33/48792;;G16H10/40;;G16H50/20;;A61B5/165;;A61B5/0004;;A61B5/02055;;A61B5/02416;;A61B5/0533;;A61B5/14546;;A61B5/14552;;A61B5/18;;A61B5/681;;A61B2560/0223;;G01N33/48792;;G16H10/40;;G16H50/20;;G16H50/30	A61B5/16;;A61B5/00;;A61B5/0205;;A61B5/024;;A61B5/053;;A61B5/145;;A61B5/1455;;A61B5/18;;G01N33/487;;G16H10/40;;G16H50/20;;G16H50/30		0	0				ACTIVE	X
15	US	B1	US 10610111 B1	120-681-762-670-922	43928	2020	US 201715626014 A	42902	US 201715626014 A;;US 51263006 A;;US 81826006 P	38898	Smart watch	Systems and methods include a cellular, WiFi, and Bluetooth transceiver coupled to a processor; an accelerometer or a motion sensor coupled to the processor; and a sensor coupled to the processor to sense mood or body vital sign; and a wearable device operating wirelessly with the processor, wherein the wearable device includes at least one sensor coupled to a back of the wearable device and wher…	TRAN BAO	TRAN BAO	BT WEARABLES LLC (2023-04-26);;EMPIRE IP LLC (2023-02-21)	https://lens.org/120-681-762-670-922	Granted Patent	yes	319	56	8	068-454-889-018-065;;183-326-736-752-210;;138-062-021-573-253;;031-066-872-285-08X;;185-707-819-641-104;;052-065-427-125-78X;;056-732-644-040-354;;120-681-762-670-922	US	11	068-454-889-018-065;;183-326-736-752-210;;138-062-021-573-253;;031-066-872-285-08X;;081-135-003-731-05X;;185-707-819-641-104;;052-065-427-125-78X;;169-592-630-818-861;;056-732-644-040-354;;055-483-656-511-941;;120-681-762-670-922	US	0	A61B5/0006;;A61B5/0022;;A61B5/021;;A61B5/02438;;A61B5/0537;;A61B5/0816;;A61B5/11;;A61B5/1112;;A61B5/1117;;A61B5/1135;;A61B5/145;;A61B5/14532;;A61B5/411;;A61B5/4818;;A61B5/4839;;A61B5/6804;;A61B5/681;;A61B5/721;;A61B5/7214;;A61B5/7225;;A61B5/7257;;A61B5/726;;A61B5/7275;;A61B7/003;;A61B8/06;;A61B8/4472;;A61B8/56;;A61B2560/0214;;A61B5/7232;;A61B5/7267;;A61B2503/08;;A61B8/0808;;A61B8/565;;A61B5/4023;…	A61B5/0205;;A61B5/00;;A61B5/021;;A61B5/024;;A61B5/08;;A61B5/11;;A61B5/113;;A61B5/145;;A61B5/296;;A61B5/332;;A61B7/00;;A61B8/00;;A61B8/06;;A61B8/08;;G06Q50/22;;G16H40/20		2	0			U.S. Appl. No. 10/938,783, filed Sep. 10, 2004, Wen.;;U.S. Appl. No. 10/938,783, Wen.	ACTIVE	X
16	US	B2	US 11992299 B2	027-948-823-274-755	45440	2024	US 201916682891 A	43782	US 201916682891 A;;US 201862781523 P	43452	Wearable devices for health monitoring using radio waves that include signal isolation	A wearable device is disclosed. The wearable device includes a housing, an attachment device configured to attach the housing to a person, at least one transmit antenna configured to transmit millimeter range radio waves over a 3D space below the skin surface of the person, multiple receive antennas configured to receive radio waves, the received radio waves including a reflected portion of the t…	MOVANO INC	LEABMAN MICHAEL A	MOVANO INC (2019-11-12)	https://lens.org/027-948-823-274-755	Granted Patent	yes	62	0	22	158-543-172-651-362;;042-992-726-555-311;;101-277-810-332-765;;113-203-025-073-378;;005-279-652-001-977;;027-948-823-274-755;;071-723-302-422-124;;057-242-446-938-942;;040-660-064-920-24X;;151-754-308-602-89X;;182-956-398-308-503;;094-567-535-525-434;;048-790-634-783-467;;190-932-245-542-335;;094-860-219-952-832;;011-171-194-366-305;;158-873-739-431-574;;026-839-353-594-543;;093-006-678-580-717;;…	CN;;EP;;US;;WO	74	158-543-172-651-362;;040-660-064-920-24X;;032-294-392-512-31X;;022-944-485-015-290;;005-279-652-001-977;;101-277-810-332-765;;029-099-056-633-540;;193-826-835-705-288;;071-723-302-422-124;;061-661-022-775-386;;095-551-725-323-657;;151-754-308-602-89X;;182-956-398-308-503;;153-779-872-566-299;;089-493-502-328-661;;198-027-981-179-838;;133-219-136-622-706;;026-839-353-594-543;;027-948-823-274-755;;…	CN;;EP;;US;;WO	0	H04B7/086;;G01S13/88;;A61B5/14532;;A61B5/0507;;A61B5/021;;A61B5/024;;A61B5/681;;A61B5/6898;;A61B5/7207;;A61B5/7257;;A61B5/742;;H04B1/385;;H04B2001/3861;;H04B2001/3855;;A61B5/0245;;H04B7/08;;H04B7/06;;A61B5/681;;A61B5/14532;;A61B5/02141;;A61B5/05;;A61B5/7207;;A61B5/725;;A61B5/7257;;H04B7/0617;;G01S7/032;;G01S13/0209;;G01S13/26;;G01S2013/0245;;A61B5/021;;A61B5/02444;;A61B5/489;;A61B5/6898;;A61B5/74…	A61B5/0245;;A61B5/00;;A61B5/0205;;A61B5/021;;A61B5/024;;A61B5/05;;A61B5/145;;G01S7/02;;G01S7/03;;G01S13/02;;G01S13/26;;G01S13/76;;G01S13/88;;H03D7/16;;H04B1/04;;H04B7/06;;H04B7/08		30	14	069-484-669-685-388;;003-997-746-479-107;;015-863-144-193-031;;020-761-321-454-137;;084-897-621-690-830;;030-642-885-975-465;;012-759-055-427-140;;018-158-077-402-985;;112-672-561-456-722;;081-194-784-011-943;;054-532-151-256-588;;016-813-088-091-348;;041-481-795-211-108;;018-158-077-402-985	10.1109/mwsym.2004.1338841;;10.3390/s17081866;;28805693;;pmc5579887;;10.1088/1742-6596/588/1/012046;;pmc6412701;;30781431;;10.3390/s19040800;;10.1007/978-1-4419-6775-6_6;;10.1145/2897824.2925953;;10.1109/jssc.2016.2585621;;pmc5537249;;28761121;;10.1038/s41598-017-06926-1;;10.1109/irmmw-thz.2014.6956294;;10.1109/access.2019.2904493;;10.3390/diagnostics9010006;;pmc6468903;;30626128;;10.1007/s10762-…	R. N. Simons, D. G. Hall and F. A. Miranda, “RF telemetry system for an implantable bio-MEMS sensor,” 2004 IEEE MTT-S International Microwave Symposium Digest (IEEE Cat. No. 04CH37535), Fort Worth, TX, USA, 2004, pp. 1433-1436 vol. 3, (Year: 2004).;;Bruen, Danielle et al. “Glucose Sensing for Diabetes Monitoring: Recent Developments”, Sensors 2017, 21 pgs.;;Cespedes, Fabiola Araujo, “RF Sensoring…	ACTIVE	X
17	US	B2	US 10194862 B2	026-918-148-500-89X	43501	2019	US 201615279543 A	42642	US 201615279543 A;;US 201562271322 P	42366	Smart wearable device for health watch	A wearable device comprising a display dial configured to display various health parameters, a wristband assisting the device to wear on wrist, an eject-able tray comprising a micro-chip, a first spring coupled to the eject-able tray, at least one latch provided with a second spring to hold the eject-able tray within the device by compressing the first spring, and a health monitoring unit provide…	SENSESEMI TECH PRIVATE LIMITED	CHAKRAVARTHI VEENA S;;DODAGOUDAR PRAVEEN;;MUNDKUR VISHWESHWARA		https://lens.org/026-918-148-500-89X	Granted Patent	yes	8	5	2	189-689-799-984-378;;026-918-148-500-89X	US	2	189-689-799-984-378;;026-918-148-500-89X	US	0	A61B5/681;;A61B5/0022;;A61B5/01;;A61B5/0205;;A61B5/02125;;A61B5/022;;A61B5/02416;;A61B5/02438;;A61B5/0245;;A61B5/14517;;A61B5/14532;;A61B5/14552;;A61B5/1486;;A61B5/150022;;A61B5/150358;;A61B5/150412;;A61B5/150862;;A61B5/157;;A61B5/339;;A61B5/352;;A61B5/4845;;A61B5/7246;;A61B5/7475;;A61B2562/0219;;G16H40/67;;G16H50/30;;A61B5/681;;A61B5/0022;;A61B5/01;;A61B5/0205;;A61B5/02125;;A61B5/022;;A61B5/0241…	A61B5/00;;A61B5/01;;A61B5/0205;;A61B5/021;;A61B5/022;;A61B5/024;;A61B5/0245;;A61B5/145;;A61B5/1455;;A61B5/1486;;A61B5/15;;A61B5/157;;A61B5/352;;G16H50/30		0	0				ACTIVE	X
18	US	B2	US 11278242 B2	005-109-058-493-153	44642	2022	US 201916656248 A	43755	TW 107138685 A	43404	Wearable health monitoring device	A wearable health monitoring includes a monitoring main-body, a wearable component and a biometric monitoring module. The wearable component is connected with the monitoring main-body. The biometric monitoring module is disposed within the monitoring main-body and includes a photoelectric sensor, a pressure sensor and an air-pressure-based blood pressure meter. The air-pressure-based blood pressu…	MICROJET TECHNOLOGY CO LTD	MOU HAO-JAN;;LIN CHING-SUNG;;HUANG CHI-FENG;;HAN YUNG-LUNG;;KUO CHUN-YI	MICROJET TECHNOLOGY CO. LTD (2019-09-04)	https://lens.org/005-109-058-493-153	Granted Patent	yes	15	0	4	096-815-358-245-070;;005-109-058-493-153;;013-533-542-055-49X;;179-292-463-226-153	TW;;US	4	096-815-358-245-070;;005-109-058-493-153;;013-533-542-055-49X;;179-292-463-226-153	TW;;US	0	A61B5/02141;;A61B5/0022;;A61B5/02225;;A61B5/02233;;A61B5/02416;;A61B5/02438;;A61B5/681;;A61B5/6824;;A61B2560/0223;;A61B2562/16;;A61B5/681;;A61B5/0022;;A61B5/02438;;A61B5/746;;A61B2562/0247	A61B5/00;;A61B5/024		0	0				ACTIVE	X
19	US	B1	US 10517536 B1	023-530-162-735-660	43830	2019	US 201916368683 A	43552	US 201916368683 A;;US 201862648997 P	43187	Biometric wearable and EDA method for acquiring biomarkers in perspiration	A wearable biometric sensing ring apparatus for continuous heart rate and blood pressure monitoring having a ring housing for retention on a finger of a user, an electrodermal activity (EDA) sensor disposed within the housing so as to contact a location of the skin of the finger when the housing is retained on the finger, the EDA sensor configured for measuring changes in skin impedance indicativ…	SENSTREAM INC	LUSTED HUGH	SENSTREAM INC (2019-04-12)	https://lens.org/023-530-162-735-660	Granted Patent	yes	40	4	1	023-530-162-735-660	US	1	023-530-162-735-660	US	0	A61B5/6826;;A61B5/0531;;A61B5/14517;;A61B5/14532;;A61B5/1468;;A61B2562/0209;;A61B2562/166;;A61B5/6826;;A61B5/0002;;A61B5/0205;;A61B5/02416;;A61B5/0531;;A61B5/14517;;A61B5/4035;;A61B5/7425;;A61B2562/0209;;A61B2562/063	A61B5/00;;A61B5/0205;;A61B5/024;;A61B5/053;;A61B5/145		0	0				ACTIVE	X
21	EP	B1	EP 3952742 B1	190-151-444-146-659	44860	2022	EP 20717655 A	43929	EP 19168486 A;;EP 2020060044 W	43565	DETECTION OF BIOMARKERS IN SWEAT		KONINKLIJKE PHILIPS NV	PELSSERS EDUARD GERARD MARIE;;JOHNSON MARK THOMAS;;VAN GIJSEL THOMAS JOHANNES;;VAN LIESHOUT RON MARTINUS LAURENTIUS;;DELLIMORE KIRAN HAMILTON J		https://lens.org/190-151-444-146-659	Granted Patent	yes	2	0	9	146-649-032-515-684;;067-455-858-151-080;;167-985-380-323-528;;102-039-841-960-003;;159-296-935-940-754;;101-200-324-222-397;;177-509-984-461-070;;060-914-997-288-357;;190-151-444-146-659	CN;;EP;;JP;;US;;WO	9	146-649-032-515-684;;060-914-997-288-357;;167-985-380-323-528;;102-039-841-960-003;;159-296-935-940-754;;101-200-324-222-397;;177-509-984-461-070;;067-455-858-151-080;;190-151-444-146-659	CN;;EP;;JP;;US;;WO	0	A61B5/14517;;A61B5/4266;;A61B10/0064;;A61B5/14517;;A61B5/4266;;A61B10/0064;;B01L3/502715;;B01L2300/047;;B01L2300/0663;;B01L2300/069	A61B5/145;;A61B5/00;;A61B10/00		0	0				ACTIVE	X
22	US	B2	US 11266381 B2	059-526-110-121-266	44628	2022	US 201816218586 A	43447	US 201816218586 A;;US 201414516962 A;;US 201462003707 P;;US 201361892859 P	41565	Devices for integrated, repeated, prolonged, and/or reliable sweat stimulation and biosensing	A sweat sensing device includes a plurality of sweat collection pads communicating with a sensor. Each of the pads is activated by a timing circuit which allows one or more of the pads to be activated at a selected time and subsequent deactivated after a defined period of time. This allows for selective collection of sweat from a plurality of pads over a prolonged period of time. An impedance mea…	UNIV CINCINNATI	HEIKENFELD JASON CHARLES;;SONNER ZACHARY COLE		https://lens.org/059-526-110-121-266	Granted Patent	yes	150	0	16	135-966-113-970-427;;093-353-240-440-177;;005-164-960-996-320;;092-156-095-209-665;;156-273-182-720-958;;145-671-948-348-024;;141-507-250-340-450;;023-736-015-059-416;;149-177-358-338-91X;;175-610-116-465-737;;142-243-854-764-14X;;059-526-110-121-266;;136-900-354-002-501;;022-819-307-749-74X;;064-327-571-692-773;;110-396-701-772-647	CN;;EP;;JP;;US;;CA;;AU;;WO	79	158-479-679-927-782;;161-436-524-283-01X;;096-812-605-203-115;;005-164-960-996-320;;160-677-942-231-280;;141-507-250-340-450;;023-736-015-059-416;;034-654-636-137-35X;;176-632-055-693-413;;114-323-585-428-336;;047-163-276-316-658;;149-177-358-338-91X;;009-369-135-278-913;;175-610-116-465-737;;043-162-905-363-618;;138-116-569-671-407;;007-976-300-013-604;;145-571-925-766-364;;157-177-319-935-033;;…	CN;;EP;;JP;;US;;CA;;AU;;WO	0	A61B10/0064;;A61B5/0531;;A61B5/14521;;A61B5/282;;A61B5/4266;;A61B2010/0009;;A61B2562/046;;A61B2562/168;;A61M2202/092;;A61B10/0064;;A61B5/0531;;A61B5/0537;;A61B5/14521;;A61B5/1491;;A61B5/282;;A61B5/4266;;A61B5/6843;;A61B2010/0009;;A61B2562/168;;A61M2202/092;;A61N1/325	A61B5/145;;A61B5/00;;A61B5/0531;;A61B5/0537;;A61B5/1491;;A61B5/282;;A61B5/296;;A61B10/00;;A61N1/32		42	4	069-300-893-727-539;;038-935-526-365-796;;004-542-264-225-601;;114-206-043-258-624	20300678;;pmc3228840;;10.1039/b919614e;;25004153;;pmc4168435;;10.3390/s140711957;;23344373;;pmc3574664;;10.3390/s130100058;;10.1063/1.4921039;;26045728;;pmc4433483	International Searching Authority, Search Report and Written Opinion issued in corresponding International Application No. PCT/US2014/061098 dated Dec. 12, 2014, 13 pages.;;International Searching Authority, Search Report and Written Opinion issued in International Application No. PCT/US2014/061083 dated Mar. 31, 2015, 18 pages.;;International Searching Authority, Search Report and Written Opinio…	ACTIVE	X
23	US	B2	US 12023170 B2	122-664-131-171-519	45475	2024	US 202118014362 A	44385	US 202118014362 A;;US 202063049245 P;;US 2021/0040847 W	44020	Systems and methods for wireless, real-time monitoring parameters of sweat and applications of same	This invention discloses a sensor for measuring parameters of sweat from a skin, comprising a flexible structure comprising a fluid passage having inlet and outlet, the flexible structure being detachably attached to the skin and configured such that sweat enters the inlet as the sweat releases from the skin and flows through the fluid passage into the outlet; a thermal actuator disposed on the f…	UNIV NORTHWESTERN	ROGERS JOHN A;;GHAFFARI ROOZBEH;;KWON KYEONGHA;;KIM JONG UK	NORTHWESTERN UNIVERSITY (2023-01-18)	https://lens.org/122-664-131-171-519	Granted Patent	yes	11	2	3	024-463-762-243-247;;122-664-131-171-519;;155-044-068-670-541	US;;WO	3	024-463-762-243-247;;122-664-131-171-519;;155-044-068-670-541	US;;WO	0	A61B5/01;;A61B5/6833;;A61B2505/09;;A61B2503/10;;A61B5/14521;;A61B5/14539;;A61B5/1455;;A61B5/14532;;A61B2562/12;;A61B5/4875;;A61B10/0064;;F24F11/63;;A61B5/002;;A61B5/01;;A61B5/4266;;A61B5/6833;;A61B5/7225;;A61B2562/0271;;A61B2562/164;;G05B19/042;;G05B2219/2614	A61B5/00;;A61B5/01;;F24F11/63;;G05B19/042		51	50	053-474-035-924-703;;027-686-981-129-783;;009-093-038-340-370;;114-206-043-258-624;;057-058-378-163-11X;;058-204-646-849-257;;049-512-331-323-822;;041-736-270-492-623;;036-874-091-414-712;;053-729-595-756-623;;026-549-702-990-494;;011-231-628-275-120;;005-780-003-420-10X;;139-805-297-003-017;;062-107-128-059-765;;029-140-047-425-274;;005-749-698-409-12X;;106-049-010-255-893;;152-374-704-749-73X;;…	28332116;;pmc5371639;;10.1007/s40279-017-0691-5;;29491186;;pmc5985668;;10.1126/scitranslmed.aao3612;;10.1038/s41928-018-0043-y;;pmc4433483;;10.1063/1.4921039;;26045728;;26819044;;10.1038/nature16521;;pmc4996079;;10.1126/sciadv.aau6356;;30746456;;pmc6357724;;30746477;;10.1126/sciadv.aav3294;;pmc6357758;;10.1152/japplphysiol.00197.2009;;19541738;;10.1123/ijsnem.17.6.583;;18156663;;10.1123/ijspp.7.4…	Korean Intellectual Property Office (ISR/KR), “International Search Report for PCT/US2021/040847”, Korea, Nov. 4, 2021.;;Baker, L. B. Sweating rate and sweat sodium concentration in athletes: a review of methodology and intra/interindividual variability. Sports Med. 47, 111-128 (2017).;;Gambhir, S. S., Ge, T. J., Vermesh, O. & Spitler, R. Toward achieving precision health. Sci. Transl. Med. 10, e…	ACTIVE	X
24	US	B2	US 9962075 B2	015-230-182-483-136	43228	2018	US 201715465285 A	42815	US 201715465285 A;;US 201514698641 A;;US 201461985278 P	41757	Devices, methods, and systems of functional optical coherence tomography	The present disclosure provides systems and methods for the determining a rate of change of one or more analyte concentrations in a target using non invasive non contact imaging techniques such as OCT. Generally, OCT data is acquired and optical information is extracted from OCT scans to quantitatively determine both a flow rate of fluid in the target and a concentration of one or more analytes. …	UNIV NORTHWESTERN;;OPTICENT INC	YI JI;;LIU WENZHONG;;BACKMAN VADIM;;ZHANG HAO F;;PATEL KIEREN J	OPTICENT INC (2017-09-25);;NORTHWESTERN UNIVERSITY (2014-06-24)	https://lens.org/015-230-182-483-136	Granted Patent	yes	15	9	12	021-635-823-510-265;;025-248-641-200-712;;109-813-517-294-12X;;196-399-972-343-311;;015-230-182-483-136;;053-688-004-219-730;;112-009-421-167-215;;155-842-167-678-465;;028-356-839-598-495;;142-879-185-245-361;;181-425-491-449-440;;140-305-124-491-459	CN;;EP;;US;;CA;;AU;;WO	12	025-248-641-200-712;;140-305-124-491-459;;196-399-972-343-311;;109-813-517-294-12X;;015-230-182-483-136;;053-688-004-219-730;;112-009-421-167-215;;155-842-167-678-465;;028-356-839-598-495;;142-879-185-245-361;;181-425-491-449-440;;021-635-823-510-265	CN;;EP;;US;;AU;;CA;;WO	0	A61B5/0066;;A61B3/102;;A61B3/1233;;A61B5/0073;;A61B5/0261;;G06F17/10;;G06T7/0012;;G06T11/003;;G06T2207/10101;;A61B3/102;;A61B3/1233;;A61B5/0066;;A61B5/0073;;A61B5/0261;;A61B3/102;;A61B1/046;;A61B3/1233;;A61B5/0066;;A61B5/0073;;A61B5/0205;;A61B5/0261;;A61B5/14507;;A61B5/14517;;A61B5/14532;;A61B5/14535;;A61B5/14542;;A61B5/14551;;G01B9/02091;;G06F17/10;;G06F17/13;;G06T7/0012;;G06T7/0014;;G06T11/003;…	G06K9/00;;A61B1/04;;A61B3/10;;A61B3/12;;A61B5/00;;A61B5/0205;;A61B5/026;;A61B5/145;;A61B5/1455;;G01B9/02;;G06F17/13;;G06T7/00		9	0			International Searching Authority, “Search Report”, issued in connection with PCT patent application No. PCT/US2015/028053, dated Jul. 23, 2015, 4 pages.;;International Searching Authority, “Written Opinion”, issued in connection with PCT patent application No. PCT/US2015/028053, dated Jul. 23, 2015, 5 pages.;;Internationa Bureau, “International Preliminary Report on Patentability”, issued in con…	ACTIVE	X
25	US	B2	US 10729324 B2	069-464-977-084-13X	44047	2020	US 201515532653 A	42339	US 201515532653 A;;US 201462087741 P;;US 201462087434 P;;IB 2015059235 W	41977	Calculating a health parameter	A wearable device may take a set of health inputs from embedded body sensors for the duration of an activity performed by a user of the wearable device. Based on these inputs, the wearable device can calculate a health parameter (e.g., calories burned during the activity). The wearable device can also track its location during the activity, and provide this location to a geolocation data network.…	KONINKLIJKE PHILIPS NV	GELISSEN JOZEF HUBERTUS;;CRONIN JOHN;;BROCKHUIS LILI-MARJAN;;HUFFINES CHRISTOPHER MICHAEL	KONINKLIJKE PHILIPS N.V (2015-12-01)	https://lens.org/069-464-977-084-13X	Granted Patent	yes	30	1	7	169-328-318-283-441;;088-694-157-017-479;;045-823-581-412-652;;106-062-034-940-250;;091-527-827-994-317;;143-657-488-294-833;;069-464-977-084-13X	CN;;EP;;US;;WO	7	169-328-318-283-441;;088-694-157-017-479;;106-062-034-940-250;;045-823-581-412-652;;091-527-827-994-317;;143-657-488-294-833;;069-464-977-084-13X	CN;;EP;;US;;WO	0	G16H50/30;;A61B5/0024;;A61B5/486;;A61B5/4866;;A61B5/6801;;A61B5/7278;;G01S19/19;;G16H20/30;;G16H40/67;;G16H50/30;;A61B5/0024;;A61B5/486;;A61B5/4866;;A61B5/6801;;A61B5/7278;;G01S19/19;;G16H20/30;;G16H40/67	A61B5/00;;G01S19/19		0	0				ACTIVE	X
27	US	B2	US 11406321 B2	116-001-625-173-341	44782	2022	US 201816629249 A	43305	US 201816629249 A;;US 201762536462 P;;US 2018/0043430 W	42941	Wearable fluidic system for measuring sweat composition	A sweat sensing device includes a flexible body having a first, outwardly facing surface and a second, skin facing surface and a sweat channel formed in the body, the sweat channel having a first end defining a fluid inlet and a second end. A biochemical assay well formed in the sweat channel and an assay material is disposed in the biochemical assay well, the assay material positioned to react w…	EPICORE BIOSYSTEMS INC	MODEL JEFFREY B;;GHAFFARI ROOZBEH;;ARANYOSI ALEXANDER J;;LEE STEPHEN P;;RAJ MILAN S	EPICORE BIOSYSTEMS INC (2020-01-06)	https://lens.org/116-001-625-173-341	Granted Patent	yes	4	2	8	114-799-204-599-320;;116-001-625-173-341;;045-508-596-588-204;;181-786-424-853-869;;169-013-355-071-61X;;165-234-708-217-287;;086-363-200-071-536;;007-811-013-310-555	EP;;JP;;US;;WO	8	114-799-204-599-320;;116-001-625-173-341;;045-508-596-588-204;;181-786-424-853-869;;169-013-355-071-61X;;165-234-708-217-287;;086-363-200-071-536;;007-811-013-310-555	EP;;JP;;US;;WO	0	A61B5/6833;;A61B10/0064;;A61B5/14517;;A61B5/4266;;A61B5/1032;;A61B5/14539;;A61B5/14546;;A61B5/1455;;A61B2562/164;;A61B5/1477;;A61B5/14532;;A61B5/01;;A61B5/024;;A61B5/318;;A61B5/002;;A61B5/0077;;A61B5/02055;;A61B5/024;;A61B5/1034;;A61B5/14532;;A61B5/14539;;A61B5/14546;;A61B5/4266;;A61B5/746;;A61B5/14517;;A61B5/6833;;A61B10/0064;;A61B2562/164;;G16H20/00	A61B5/145;;A61B5/00;;A61B5/0205;;A61B5/024;;A61B5/103;;A61B10/00;;G16H20/00		10	5	014-596-537-526-167;;033-643-370-197-899;;059-725-847-276-256;;037-583-477-299-389;;005-500-952-231-299	10.1016/s0140-6736(07)61690-0;;18207566;;18165390;;10.1097/01.aog.0000297311.33046.73;;10.1021/ac60128a023;;pmc4372687;;25804609;;10.1007/s10544-015-9948-7;;27881826;;pmc5429097;;10.1126/scitranslmed.aaf2593	Black, Robert E., et al. “Maternal and child undernutrition: global and regional exposures and health consequences.” The Lancet, vol. 371, (2008), pp. 243-260.;;Horton, Sue, et al. “Micronutrient Fortification (Iron and Salt Iodization).” Copenhagen Consensus Center Working Paper, Oct. 2008, pp. 1-32.;;McIntire, Donald D., et al., “Neonatal Mortality and Morbidity Rates in Late Preterm Births Com…	ACTIVE	X
29	US	B2	US 11166635 B2	070-279-335-980-910	44509	2021	US 202117160990 A	44224	US 202117160990 A;;US 202062967429 P	43859	ECG and bioimpedance based glucose monitoring system	A glucose monitoring system can make use of electrocardiograph (ECG) data and bioimpedance data acquired from a wearable device. The ECG data and bioimpedance data can each be processed to obtain a glucose level. These values can be processed together to obtain an adapted glucose value. In some cases, photoplethysmography data can also be used to assist in processing of the ECG data. The various …	ANEXA LABS LLC	TRAPERO MARTIN ANA;;VERMEER MICHAEL DANIEL;;ASSELIN MATHEW;;IRONSTONE JOEL STEVEN;;REYKHERT ALEXEY	ANEXA LABS LLC (2021-02-04);;BIOTRICITY INC (2025-03-21)	https://lens.org/070-279-335-980-910	Granted Patent	yes	14	0	5	146-987-644-190-421;;127-531-482-974-746;;070-279-335-980-910;;138-464-173-712-488;;069-628-661-485-445	US;;WO	5	146-987-644-190-421;;127-531-482-974-746;;070-279-335-980-910;;138-464-173-712-488;;069-628-661-485-445	US;;WO	0	G16H40/63;;A61B5/0205;;A61B5/0537;;A61B5/14532;;A61B5/257;;A61B5/282;;A61B5/346;;A61B5/4875;;A61B5/6833;;A61B2560/0252;;A61B2560/0443;;G16H10/60;;G16H15/00;;G16H20/30;;G16H20/60;;G16H20/70;;G16H40/67;;G16H50/20;;G16H50/30;;G16H50/70;;A61B5/0205;;A61B5/0006;;A61B5/053;;A61B5/0537;;A61B5/14503;;A61B5/14532;;A61B5/1495;;A61B5/257;;A61B5/282;;A61B5/333;;A61B5/339;;A61B5/346;;A61B5/352;;A61B5/355;;A61…	A61B5/0205;;A61B5/00;;A61B5/0537;;A61B5/145;;A61B5/1495;;A61B5/282;;A61B5/333;;A61B5/339;;A61B5/352;;A61B5/355;;A61B5/358;;G16H10/60;;G16H40/67;;G16H50/30;;G16H50/70		6	4	084-163-119-122-210;;056-440-001-857-315;;124-064-648-893-833;;067-010-841-084-799	10.1109/bhi.2018.8333389;;pmc6957484;;31932608;;10.1038/s41598-019-56927-5;;10.1109/icif.2007.4408095;;10.1186/s12911-019-0959-9;;pmc6921435;;31856801	S. Shin, S. Lee, T. Lee, K. Lee, Y. S. Lee and H. Kang, “Two electrode based healthcare device for continuously monitoring ECG and BIA signals,” 2018 IEEE EMBS International Conference on Biomedical & Health Informatics (BHI), 2018, pp. 141-144, doi: 10.1109/BHI.2018.8333389 (Year: 2018).;;Porumb, M., Stranges, S., Pescapè, A. et al. Precision Medicine and Artificial Intelligence: A Pilot Study o…	ACTIVE	X
30	US	B2	US 11559246 B2	079-376-464-331-601	44950	2023	US 202117340195 A	44354	US 202117340195 A;;US 202117242441 A;;US 202016874229 A;;US 201962848319 P	43600	Health monitoring device	Example aspects of a volatile organic compound detection device, a wearable health monitoring device, and a method of monitoring a user's health are disclosed. The volatile organic compound detection device can comprise a collector comprising a collector material configured to collect volatile organic compounds given off from a user's skin; a separator comprising a gas chromatography column confi…	KNOW BIOLOGICAL INC;;NAT TECH & ENG SOLUTIONS SANDIA LLC	ARNOLD GARY STEPHEN;;MOORMAN MATTHEW WALLACE;;WHITING JOSHUA JONATHAN	NATIONAL TECHNOLOGY & ENGINEERING SOLUTIONS OF SANDIA LLC (2022-12-12);;KNOW BIOLOGICAL INC (2021-06-02)	https://lens.org/079-376-464-331-601	Granted Patent	yes	41	1	3	070-925-602-863-932;;079-376-464-331-601;;002-430-175-823-627	US	33	004-968-815-450-767;;061-435-800-198-111;;074-313-014-168-456;;122-309-191-130-376;;080-851-575-000-464;;167-321-313-726-229;;133-184-340-760-703;;004-444-942-017-627;;070-925-602-863-932;;163-322-259-995-346;;075-445-081-613-477;;109-051-293-103-954;;090-588-611-705-03X;;066-613-049-167-36X;;092-262-994-365-812;;113-774-297-226-840;;014-134-447-822-396;;059-389-164-544-995;;015-947-194-002-369;;…	CN;;EP;;JP;;ES;;US;;AU;;CA;;WO;;PT	0	A61B5/4094;;A61B5/443;;A61B5/6831;;A61B5/6833;;A61B10/00;;A61B2010/0083;;G01N2030/0095;;G01N2030/062;;G01N2030/884;;A61B5/4094;;A61B5/14546;;A61B5/443;;A61B5/6831;;A61B5/6833;;A61B10/00;;A61B2010/0083;;G01N30/00;;G01N30/20;;G01N30/60;;G01N30/64;;G01N30/80;;G01N2030/025	A61B5/00;;A61B5/145;;A61B10/00;;G01N30/00;;G01N30/02;;G01N30/20;;G01N30/60;;G01N30/64;;G01N30/80		24	6	145-539-260-451-287;;145-539-260-451-287;;145-539-260-451-287;;130-467-716-174-675;;050-046-002-700-690;;052-326-176-129-331	10.25148/etd.fidc004043;;10.25148/etd.fidc004043;;10.25148/etd.fidc004043;;33360399;;10.1016/j.yebeh.2020.107690;;10.3390/bios10040040;;32316280;;pmc7235866;;10.1016/j.jchromb.2018.09.002;;30212730	Davis, The Investigation of Human Scent from Epileptic Patients for the Identification of a Biomarker for Epileptic Seizures, Oct. 31, 2017, Florida International University (see title and abstract) (Year: 2017).;;Arnold, Gary Stephen; Requirement for Restriction/Election for U.S. Appl. No. 17/242,441, filed Apr. 28, 2021, dated Sep. 1, 2021, 6 pgs.;;Arnold, Gary Stephen; Notice of Allowance for …	ACTIVE	X
31	US	B1	US 10993657 B1	084-053-713-075-405	44320	2021	US 201615394305 A	42733	US 201615394305 A;;US 201562273357 P;;US 201562273360 P	42368	Wearable hydration monitor sensors	Described herein are apparatuses and methods for measuring a hydration condition with a wearable device. The wearable device may include a housing, a flume integrated into the housing, and a sensor array. The housing may include a perimeter wall disposed around a perimeter of the housing between a top wall and a bottom wall, where the top wall, bottom wall, and perimeter wall form an inner cavity…	HALO WEARABLES LLC	MILLER DAVID R;;MILLER DEVIN W	HALO WEARABLES LLC (2016-12-29)	https://lens.org/084-053-713-075-405	Granted Patent	yes	9	10	2	049-093-883-218-71X;;084-053-713-075-405	US	2	049-093-883-218-71X;;084-053-713-075-405	US	0	A61B5/4266;;A61B5/01;;A61B5/742;;A61B5/681;;A61B5/4875;;A61B5/0205;;A61B2560/0242;;A61B5/4875;;A61B5/4266;;A61B5/742;;A61B5/01;;A61B5/681;;G01N25/62	A61B5/00;;A61B5/01;;G01N25/62		2	1	058-691-343-308-390	10.1109/jsen.2010.2046634	Salvo et al., A Wearable Sensor for Measuring Sweat Rate, IEEE Sensors Journal, vol. 10, No. 10, Oct. 2010, pp. 1557-1558 (Year: 2010).;;Adams et al., A method for the measurement of physioloc evaporative water loss, US Government Printing Office (Year: 1964).	ACTIVE	X
33	US	B2	US 11918323 B2	053-710-837-254-045	45356	2024	US 202016875880 A	43966	US 202016875880 A;;US 201816137425 A;;US 201414278062 A;;US 201361895995 P	41572	System and method for obtaining bodily function measurements using a mobile device	Methods, systems, computer-readable media, and apparatuses for obtaining at least one bodily function measurement are presented. A mobile device includes an outer body sized to be portable for user, a processor contained within the outer body, and a plurality of sensors physically coupled to the outer body. The sensors are configured to obtain a first measurement indicative of blood volume and a …	QUALCOMM INC	MARTIN RUSSEL ALLYN;;SHEYNBLAT LEONID;;HOFFMAN DOUGLAS WAYNE	QUALCOMM INCORPORATED (2014-05-28)	https://lens.org/053-710-837-254-045	Granted Patent	yes	94	0	32	078-080-196-833-760;;089-886-233-355-115;;067-045-311-309-321;;017-411-744-197-242;;167-064-622-118-695;;053-710-837-254-045;;196-963-353-563-029;;053-627-610-491-567;;083-689-687-893-304;;074-543-782-221-540;;047-711-429-577-66X;;051-074-040-329-137;;153-909-621-977-846;;028-045-459-077-200;;003-991-846-070-256;;074-075-181-439-822;;069-621-010-628-906;;045-498-219-872-027;;058-602-761-863-920;;…	CN;;KR;;EP;;JP;;US;;WO	54	067-045-311-309-321;;017-411-744-197-242;;053-710-837-254-045;;053-627-610-491-567;;183-626-086-253-544;;051-074-040-329-137;;153-909-621-977-846;;110-955-220-012-610;;003-991-846-070-256;;074-075-181-439-822;;045-326-432-377-745;;069-621-010-628-906;;185-582-908-329-888;;045-498-219-872-027;;058-602-761-863-920;;109-601-087-956-546;;005-005-686-641-923;;069-317-736-407-110;;015-026-662-622-408;;…	CN;;KR;;EP;;JP;;US;;WO	0	A61B5/6898;;A61B5/0261;;A61B5/681;;A61B5/6824;;A61B5/332;;A61B5/681;;A61B5/02416;;A61B5/02125;;A61B5/165;;A61B5/0245;;A61B5/6898;;A61B5/0537;;A61B5/14551;;A61N1/36585;;A61B5/02416;;A61N1/36564;;A61B5/02125;;A61N1/36507;;A61B5/02158;;A61B5/0031;;A61B5/6898;;A61B5/0261;;A61B5/681;;A61B5/6824;;A61B5/316;;A61B5/332;;A61B5/283;;A61B5/02028;;A61B5/021	A61B5/021;;A61B5/00;;A61B5/02;;A61B5/0215;;A61B5/024;;A61B5/026;;A61B5/283;;A61B5/316;;A61B5/332;;A61N1/365		5	3	043-080-669-229-281;;002-555-632-563-031;;012-742-041-115-014	10.1109/itcs.2010.5581266;;10.5220/0003131301560163;;17281597;;10.1109/iembs.2005.1615827	European Search Report—EP22197472—Search Authority—The Hague—dated May 30, 2023.;;International Search Report and Written Opinion—PCT/US2014/061122—ISA/EPO—dated Dec. 19, 2014.;;Kim Y., et al., “Cuffless and Non-invasive Estimation of a continuous blood pressure based on PTT”, IEEE, 2010, pp. 4.;;Abat M., et al., “Wearable Blood Pressure Monitoring System—Case Study of Multiplatform Applications …	ACTIVE	X
34	US	B2	US 11471133 B2	109-914-287-478-945	44852	2022	US 201916567706 A	43719	KR 20180108501 A	43354	Apparatus and method for measuring blood concentration of analyte	An apparatus for estimating blood concentration of an analyte may include a sweat collector configured to collect sweat from a skin surface of a user. The apparatus may include an optical sensor configured to emit light rays of different wavelengths towards the collected sweat, and detect an optical signal reflected by the collected sweat. The apparatus may include a processor configured to estim…	SAMSUNG ELECTRONICS CO LTD	KIM SANG KYU;;LEE JUN HO	SAMSUNG ELECTRONICS CO. LTD (2020-01-02)	https://lens.org/109-914-287-478-945	Granted Patent	yes	11	1	4	057-275-355-664-924;;109-914-287-478-945;;164-769-001-806-269;;084-465-871-724-803	KR;;US	4	057-275-355-664-924;;109-914-287-478-945;;164-769-001-806-269;;084-465-871-724-803	KR;;US	0	A61B10/0064;;A61B5/14517;;A61B5/1455;;A61B5/14532;;A61B5/14546;;A61B5/681;;A61B5/7267;;G01N21/8483;;A61B5/1455;;A61B5/0075;;A61B10/0064;;A61B5/14521;;G01N21/8483;;A61B5/1455	A61B5/1455;;A61B5/145;;A61B10/00;;G01N21/84		5	4	003-997-746-479-107;;002-458-803-458-937;;005-500-952-231-299;;009-093-038-340-370	10.3390/s17081866;;28805693;;pmc5579887;;28345030;;10.1126/sciadv.1601314;;pmc5342654;;27881826;;10.1126/scitranslmed.aaf2593;;pmc5429097;;10.1038/s41928-018-0043-y	Nurul Akmal Binti Abd Salam et al., “The Evolution of Non-invasive Blood Glucose Monitoring System for Personal Application”, Journal of Telecommunication, Electronic and Computer Engineering, vol. 8, No. 1, 2016, pp. 59-65.;;Danielle Bruen et al., “Glucose Sensing for Diabetes Monitoring: Recent Developments”, Sensors, 17, 1866, MDPI, Aug. 12, 2017, pp. 1-21.;;Hyunjae Lee et al., “Wearable/dispo…	ACTIVE	X
37	US	B1	US 12089931 B1	136-141-244-951-285	45552	2024	US 202117407843 A	44428	US 202117407843 A;;US 202063077457 P	44085	Optical sensor for skin-contact detection and physiological parameter measurement at wearable electronic device	A wearable electronic device (e.g., an electronic watch) may detect and analyze one or more sensing signals corresponding to light detected by the device to determine whether the device is in a sensing state (e.g., the device is within a maximum sensing distance of a user). If the wearable electronic device is in the sensing state, the device may determine one or more physiological parameters fro…	APPLE INC	DUAN XIYU;;CERUSSI ALBERT E;;MANNHEIMER PAUL D;;MOHAMMADI SAEED	APPLE INC (2021-08-05)	https://lens.org/136-141-244-951-285	Granted Patent	yes	239	0	1	136-141-244-951-285	US	1	136-141-244-951-285	US	0	A61B5/02438;;A61B5/02427;;A61B5/742;;A61B5/6844;;A61B5/681;;A61B5/14552;;A61B5/14552;;A61B2560/04;;A61B5/681;;A61B2562/0238;;A61B5/742;;A61B5/6844	A61B5/1455;;A61B5/00		7	2	076-627-103-817-918;;110-494-802-049-705	10.3390/s16071052;;pmc4970099;;27399713;;10.1109/68.740711	US 11,819,316 B1, 11/2023, Allec et al. (withdrawn);;Gonzalez-Sanchez et al., “Capacitive Sensing for Non-Invasive Breathing and Heart Monitoring in Non-Restrained, Non-Sedated Laboratory Mice,” Sensors 2016, vol. 16, No. 1052, pp. 1-16.;;He et al., “Integrated Polarization Compensator for WDM Waveguide Demultiplexers,” IEEE Photonics Technology Letters vol. 11, No. 2, Feb. 1999, pp. 224-226.;;Ky…	ACTIVE	X
38	US	B2	US 11986288 B2	060-404-717-638-00X	45433	2024	US 201815912473 A	43164	US 201815912473 A;;US 201762467653 P	42800	Colorometric sensor for the non-invasive screening of glucose in sweat in pre and type 2 diabetes	Described here are patches and methods for measuring glucose in sweat (and tears and the like). In general, the patches comprise an adhesive layer adapted to bond to skin of an individual, a substrate layer disposed over the adhesive layer and comprising a glucose sensing complex including a chromogen that changes color in the presence of certain concentrations of glucose, and a cover. In typical…	MEDTRONIC MINIMED INC	RAO ASHWIN K;;GOTTLIEB REBECCA K;;ONG QUYEN	MEDTRONIC MINIMED INC (2018-11-15)	https://lens.org/060-404-717-638-00X	Granted Patent	yes	96	0	13	065-050-476-861-222;;185-727-100-266-460;;137-471-775-729-542;;177-826-302-277-057;;024-827-712-788-42X;;085-963-742-587-636;;060-404-717-638-00X;;133-279-071-825-100;;104-964-457-505-146;;009-452-937-154-119;;198-588-802-811-632;;195-342-428-567-174;;089-812-662-588-767	CN;;EP;;US;;CA	18	065-050-476-861-222;;185-727-100-266-460;;137-471-775-729-542;;177-826-302-277-057;;164-916-521-094-194;;080-675-040-739-799;;168-168-763-747-105;;024-827-712-788-42X;;085-963-742-587-636;;060-404-717-638-00X;;133-279-071-825-100;;104-964-457-505-146;;009-452-937-154-119;;198-588-802-811-632;;060-853-285-929-228;;089-812-662-588-767;;195-342-428-567-174;;045-302-462-149-982	CN;;EP;;US;;CA;;WO	0	A61B5/14517;;A61B5/14532;;A61B5/4266;;G01N33/52;;G01N33/66;;G01N21/78;;A61B5/14532;;A61B5/14539;;A61B5/14517;;A61B5/6833;;A61B5/14546;;A61B5/1486;;C12Q1/006;;A61B5/6832;;A61B2560/0412;;C12Q1/54;;G01N33/526;;G01N2800/042;;A61B5/14532;;G01N33/66;;A61B5/14539;;A61B5/14517;;A61B5/6833;;A61B5/1477;;A61B5/14546;;A61B5/1486;;C07K14/62;;C12Q1/006;;G01N33/526	A61B5/145;;A61B5/00;;A61B5/1477;;A61B5/1486;;C07K14/62;;C12Q1/00;;G01N33/52;;G01N33/66		3	0			PCT International Search Report & Written Opinion dated Jun. 7, 2018 for PCT Application No. PCT/US2018/021179.;;European Communication Pursuant to Article 94(3) EPC dated Mar. 3, 2023 for EP Application No. 1871744.2.;;Chinese Second Office Action dated Jun. 30, 2022 for Chinese Patent Application No. 201880019595.1.	ACTIVE	X
39	US	B2	US 11690567 B2	026-573-547-492-136	45111	2023	US 202117220843 A	44287	US 202117220843 A;;US 201916395148 A;;US 201862663926 P	43217	Tissue hydration monitor	A tissue hydration monitor and method includes a sensor module having a plurality of LEDs positioned to emit a plurality of different wavelengths of light toward the user's skin and a detector that detects light transmitted and reflected through the user's skin to generate signals corresponding to an intensity of detected light at each of the different wavelengths. A processor/controller module g…	HYDROSTASIS INC	CHEN DEBBIE K	HYDROSTASIS INC (2019-05-03)	https://lens.org/026-573-547-492-136	Granted Patent	yes	38	0	11	001-481-779-804-244;;197-806-729-387-738;;069-541-505-658-63X;;066-304-774-589-750;;038-273-887-916-282;;092-576-407-978-529;;071-699-267-635-791;;048-285-017-754-655;;169-511-041-197-895;;026-573-547-492-136;;076-291-655-343-670	CN;;EP;;US;;WO	11	197-806-729-387-738;;001-481-779-804-244;;069-541-505-658-63X;;066-304-774-589-750;;169-511-041-197-895;;071-699-267-635-791;;092-576-407-978-529;;048-285-017-754-655;;038-273-887-916-282;;026-573-547-492-136;;076-291-655-343-670	CN;;EP;;US;;WO	0	A61B5/4875;;A61B5/443;;A61B5/7267;;A61B5/6831;;A61B5/6833;;A61B5/746;;A61B5/0075;;A61B5/02416;;A61B5/7455;;A61B5/002;;A61B5/7207;;A61B5/4875;;A61B5/443;;A61B5/0075;;A61B5/6831;;A61B5/6813;;A61B5/746;;A61B5/4261;;A61B5/7278;;A61B5/7267;;A61B5/6833	A61B5/00		8	4	007-641-938-287-888;;125-348-715-336-967;;007-641-938-287-888;;007-641-938-287-888	29353987;;pmc5773122;;10.1134/s1063771016040175;;10.3389/fphys.2018.00743;;pmc6031746;;30002629;;29353987;;pmc5773122;;10.1134/s1063771016040175;;29353987;;pmc5773122;;10.1134/s1063771016040175	Acoustical Method of Whole-Body Hydration Status Monitoring to Sarvazyan et al. (Year: 2016).;;Hydration Tech is Still in the Lab; Sports Innovation Lab; https://blogsportsilab.com/2018/04/19/hydration-tech-is-still-n-the-lab/; downloaded Feb. 1, 2019, 2 pages.;;Maslakovic, M. “Nobo B60 uses light to measure how much water is in your body”, Gadgets & Wearables ???;;PCT/US2019/029224 International…	ACTIVE	X
40	US	B2	US 11911154 B2	156-518-763-123-599	45349	2024	US 202117170837 A	44235	CN 201911284119 A	43812	Skin-attached blood oxygen saturation detection system and preparation method thereof	The disclosure discloses a skin-attached blood oxygen saturation detection system and a preparation method thereof. The system includes a front-end flexible blood oxygen saturation detection circuit and a back-end signal processing output module connected to each other. The front-end flexible blood oxygen saturation detection circuit uses a flexible packaging material to act as a packaging layer,…	UNIV HUAZHONG SCIENCE TECH	WU HAO;;HUANG XIN;;YANG GANGUANG	HUAZHONG UNIVERSITY OF SCIENCE AND TECHNOLOGY (2021-01-15)	https://lens.org/156-518-763-123-599	Granted Patent	yes	7	0	4	012-667-353-508-119;;156-518-763-123-599;;067-365-039-730-012;;081-615-081-745-847	CN;;US	4	012-667-353-508-119;;156-518-763-123-599;;067-365-039-730-012;;081-615-081-745-847	CN;;US	0	A61B5/14551;;A61B5/14552;;A61B2562/164;;A61B2562/12;;A61B5/14552;;A61B5/14551;;A61B5/6833;;A61B5/0022;;A61B5/14551;;A61B5/6833;;A61B2562/12;;A61B2562/164	A61B5/1455;;A61B5/00		4	2	009-585-022-827-847;;020-307-033-315-28X	10.21474/ijar01/431;;10.1016/j.vrih.2019.08.001	Madhura Jamkhedkar, Kaustubh Jawalekar, Sayali Gawande, Wrushali Mendre, “Biometric Wrist Band”, Apr. 2016, International Journal of New Technology and Research, vol. 2, Issue 4, pp. 65-68 (Year: 2016).;;Wonjun Lee, Youngsun Han, Chulwoo Kim, Jae-sung Rieh, Jongsun Park, Jae Young Park, and Seon Wook Kim, “Ultra-low-power Pulse Oximeter with a 32.768 kHz Real Clock”, Apr. 2017, IEIE Transactions …	ACTIVE	X
41	US	B2	US 12109013 B2	045-931-166-145-735	45573	2024	US 202118290695 A	44467	CN 202111074743 A;;CN 2021121144 W	44453	On-skin sensing system for detecting blood flow status in postoperative flap and reconstructed limb	The present invention relates to the field of medical health monitoring. Disclosed in the present invention is an on-skin sensing system for detecting blood flow status in a postoperative flap and reconstructed limb, the system including a front-end status detection module and a back-end signal processing and outputting module. The front-end status detection module acquires, in real time, blood o…	UNIV HUAZHONG SCIENCE TECH	WU HAO;;YANG GANGUANG;;ZHANG JINWEN	HUAZHONG UNIVERSITY OF SCIENCE AND TECHNOLOGY (2024-01-05)	https://lens.org/045-931-166-145-735	Granted Patent	yes	17	0	5	040-025-573-048-653;;176-669-489-320-146;;095-126-623-500-192;;007-662-198-729-021;;045-931-166-145-735	CN;;US;;WO	5	045-931-166-145-735;;176-669-489-320-146;;095-126-623-500-192;;007-662-198-729-021;;040-025-573-048-653	CN;;US;;WO	0	A61B5/02055;;A61B5/14551;;A61B5/14552;;A61B5/6802;;A61B5/02;;A61B5/01;;A61B5/725;;C08F251/00;;Y02D30/70;;A61B5/6833;;A61B5/02055;;A61B5/14552;;A61B5/445;;A61B2560/0412;;A61B2562/12;;A61B2562/166;;A61B5/002;;A61B5/01;;A61B5/02055;;A61B5/02427;;A61B5/0295;;A61B5/14552;;A61B5/6832;;A61B5/725;;A61B5/7475;;A61B2560/045;;A61B2560/0462;;A61B2562/0271;;A61B2562/12;;A61B2562/164;;A61B2562/166	A61B5/0295;;A61B5/00;;A61B5/01;;A61B5/0205;;A61B5/024;;A61B5/1455		3	0			International Search Report and Written Opinion issued in PCT/CN2021/121144, dated May 25, 2022, 11 pages provided, with English translation of International Search Report.;;Office Action issued in corresponding Chinese Application No. 202111074743.X, dated Sep. 23, 2022, 20 pages, with English translation.;;Notice of Allowance issued in corresponding Chinese Application No. 202111074743.X, dated…	ACTIVE	X
42	US	B2	US 12027031 B2	094-382-309-636-928	45475	2024	US 202117555623 A	44550	KR 20200182001 A;;KR 2021018162 W	44188	Wearable device, system including electronic device and wearable device, and method	A wearable electronic device and method are disclosed, including a display, a biometric sensor, a communication circuitry, and a processor. The processor implements the method, including: receiving a transmission including air quality information from an external electronic device equipped with a gas sensor, detecting, via a biometric sensor, biometric information of a user, identifying, via at l…	SAMSUNG ELECTRONICS CO LTD	SEO HYEJUNG;;PARK HYUNCHEOL;;WON JINHEE;;JE SEONGMIN	SAMSUNG ELECTRONICS CO. LTD (2021-12-20)	https://lens.org/094-382-309-636-928	Granted Patent	yes	21	1	2	094-382-309-636-928;;027-214-872-337-107	US	4	174-938-634-515-16X;;142-196-587-209-977;;094-382-309-636-928;;027-214-872-337-107	KR;;US;;WO	0	G01N33/0063;;G04G21/02;;G04G21/025;;G04G21/04;;A61B5/0002;;A61B5/681;;A61B5/1112;;A61B5/14551;;A61B5/746;;A61B5/742;;A61B2560/0242;;A61B5/021;;A61B5/024;;A61B5/14542;;G08B21/14;;G04G21/025;;G01N33/0063;;A61B5/14551;;A61B5/746;;A61B5/1112;;A61B5/742	G08B21/14;;A61B5/00;;A61B5/11;;A61B5/1455;;G01N33/00;;G04G21/02		1	0			International Search Report dated Mar. 31, 2022.	ACTIVE	X
45	US	B2	US 10737022 B2	159-711-985-369-90X	44054	2020	US 201816149565 A	43375	TW 106137201 A	43035	Liquid supplying device for human insulin injection	A liquid supplying device for a human insulin injection includes a substrate, a liquid storage chamber, a flow-guiding-and-actuating unit, a sensor and a driving chip. The flow-guiding-and-actuating unit includes a liquid guiding channel having a liquid guiding outlet in fluid communication with a liquid storage outlet of the liquid storage chamber. The sensor contacts with the human skin to meas…	MICROJET TECHNOLOGY CO LTD	MOU HAO-JAN;;MO LI-PANG;;CHEN HSUAN-KAI;;HUANG CHI-FENG;;HAN YUNG-LUNG	MICROJET TECHNOLOGY CO. LTD (2018-12-26)	https://lens.org/159-711-985-369-90X	Granted Patent	yes	13	5	7	109-686-221-728-348;;131-242-489-155-990;;143-604-206-698-217;;133-966-054-209-01X;;019-455-684-467-200;;116-829-158-503-478;;159-711-985-369-90X	EP;;TW;;JP;;US	7	109-686-221-728-348;;131-242-489-155-990;;143-604-206-698-217;;133-966-054-209-01X;;019-455-684-467-200;;116-829-158-503-478;;159-711-985-369-90X	EP;;TW;;JP;;US	0	A61M5/16881;;A61M5/14224;;A61M5/14248;;A61M5/1723;;A61M37/0015;;A61M39/223;;A61M39/26;;A61M2005/1726;;A61M2039/224;;A61M2039/265;;A61M2205/0294;;A61M2205/3303;;A61M5/16813;;A61B5/4266;;A61M5/14224;;A61M5/14248;;A61M5/14593;;A61M5/16881;;A61M5/1723;;A61M37/0015;;A61M39/223;;A61M39/26;;A61M2005/1726;;A61M2037/0023;;A61M2037/003;;A61M2039/224;;A61M2039/265;;A61M2205/0244;;A61M2205/0288;;A61M2205/029…	A61M31/00;;A61B5/00;;A61M1/00;;A61M5/142;;A61M5/145;;A61M5/168;;A61M5/172;;A61M37/00;;A61M39/22;;A61M39/26		1	0			Extended European Search Report, dated Dec. 18, 2018, for Application No. 16799928.3.	ACTIVE	X
46	US	B1	US 11559225 B1	133-992-962-453-279	44950	2023	US 202217746407 A	44698	US 202217746407 A;;US 202163295136 P	44560	Wearable biofluid volume and composition measurement system	A wearable biofluid volume and composition system includes a microfluidic flexible fluid capture substrate having a microfluidic channel configured as a sweat collection channel and is configured to be worn on a human body and to collect and analyze biofluid. The microfluidic flexible fluid capture substrate further has a plurality of conductive traces and electrodes. An electronic module is atta…	EPICORE BIOSYSTEMS INC	LEE STEPHEN P;;LEECH ADAM;;LI WEIHUA;;SCARTH ALAN P;;MODEL JEFFREY B;;GHAFFARI ROOZBEH;;ARANYOSI ALEXANDER J;;SEIB MELISSA;;WALLACE JESSICA	EPICORE BIOSYSTEMS INC (2022-05-06)	https://lens.org/133-992-962-453-279	Granted Patent	yes	28	9	1	133-992-962-453-279	US	4	008-678-716-087-560;;149-466-672-498-242;;090-321-883-386-324;;133-992-962-453-279	EP;;JP;;US	0	A61B10/0064;;A61B5/002;;A61B5/01;;A61B5/0531;;A61B5/1118;;A61B5/14517;;A61B5/4266;;A61B5/4875;;A61B5/681;;A61B5/6833;;A61B2560/0242;;A61B5/14517;;A61B5/002;;A61B5/0022;;A61B5/01;;A61B5/1118;;A61B5/14525;;A61B5/14546;;A61B5/265;;A61B5/4266;;A61B5/486;;A61B5/681;;A61B5/7405;;A61B5/742;;A61B5/7455;;A61B5/746;;A61B5/7475;;A61B10/0064;;A61B2562/0271;;A61B2562/046;;A61B2562/166	A61B5/145;;A61B5/00;;A61B5/01;;A61B5/11;;A61B5/265;;A61B10/00		5	3	102-810-158-536-60X;;005-500-952-231-299;;102-810-158-536-60X	10.1039/c2lc40935f;;23160191;;27881826;;10.1126/scitranslmed.aaf2593;;pmc5429097;;10.1039/c2lc40935f;;23160191	Kuo, Jonathan TW, et al. “Novel flexible Parylene neural probe with 3D sheath structure for enhancing tissue integration.” Lab on a Chip 13.4 (2013): 554-561. DOI: 10.1039/C2LC40935F (Year: 2013).;;International Search Report, Application No. PCT/US2018/062178, dated Feb. 1, 2019.;;Koh et al., “A soft, wearable microfluidic device for the capture, storage, and colorimetric sensing of sweat”, Scie…	ACTIVE	X
47	US	B2	US 10368794 B2	183-225-201-238-845	43683	2019	US 201514840852 A	42247	IB 2014064158 W	41880	System for the remote monitoring of the hydration status of a living being	System for monitoring the hydration status of a living being by exploiting the modulation of backscattered RF electromagnetic waves from a wearable patched placed on the skin, said system comprising: a RF-tag adapted to be directly or indirectly fixed to the skin and containing at least one passive integrated circuit coupled to an antenna;an electromagnetic RF power source for supplying different…	ECOLE POLYTECHNIQUE FED LAUSANNE EPFL	IONESCU MIHAI ADRIAN;;GUERIN HOËL	ECOLE POLYTECHNIQUE FEDERALE DE LAUSANNE (EPFL) (2015-09-07)	https://lens.org/183-225-201-238-845	Granted Patent	yes	18	2	2	089-600-229-626-043;;183-225-201-238-845	US	2	089-600-229-626-043;;183-225-201-238-845	US	0	A61B5/443;;A61B5/0002;;A61B5/01;;A61B5/0507;;A61B5/0537;;A61B5/07;;A61B5/14517;;A61B5/14546;;A61B5/6801;;A61B2560/0214;;A61B2560/0223;;A61B2560/0252;;A61B2562/164;;A61B5/443;;A61B5/0002;;A61B5/01;;A61B5/0507;;A61B5/0537;;A61B5/07;;A61B5/14517;;A61B5/14546;;A61B5/6801;;A61B2560/0214;;A61B2560/0223;;A61B2560/0252;;A61B2562/164	A61B5/00;;A61B5/01;;A61B5/05;;A61B5/053;;A61B5/07;;A61B5/145		9	8	050-812-245-803-176;;041-367-637-022-214;;040-387-355-999-782;;094-669-219-476-631;;167-839-877-122-603;;021-967-276-095-189;;060-305-457-246-232;;030-314-866-006-471	20082580;;10.1089/dia.2009.0095;;10.1016/j.chemolab.2013.01.009;;10.1136/jech-2013-202449;;24493740;;16234262;;10.1093/pubmed/fdi059;;10.1117/1.jbo.18.10.107008;;24165743;;23362244;;10.1109/tbme.2013.2241062;;10.1016/j.proche.2009.07.190;;10.1109/tmtt.2004.835916	A. Caduff, M. S. Talary, and P. Zakharov. 2010. “Cutaneous Blood Perfusion as a Perturbing Factor for Noninvasive Glucose Monitoring.” Diabetes Technology & Therapeutics 12 (1): 1-9. doi:10.1089/dia.2009.0095.;;L. Duponchel, S. Laurette, B. Hatirnaz, A. Treizebre, F. Affouard, and B. Bocquet. 2013. “Terahertz Microfluidic Sensor for in Situ Exploration of Hydration Shell of Molecules.” Chemometri…	ACTIVE	X
48	US	B2	US 11786168 B2	043-176-983-625-297	45216	2023	US 201816616898 A	43252	US 201816616898 A;;US 201762514468 P;;US 201762514520 P;;US 201762514374 P;;US 201762514455 P;;US 201762514546 P;;US 201762514515 P;;US 201762514559 P;;US 201762514489 P;;US 201762514436 P;;US 2018/0035738 W	42888	Epidermal sensing systems for optical readout, visualization and analysis of biofluids	The invention provides a versatile sensing platform for sensing and analysis of biofluids, particularly well-suited for sensing and analysis of sweat. Systems of the invention allows for sensitive and selective detection of a range of analytes in sweat including metabolites, electrolytes and biomarkers. Systems of the invention provide a noninvasive and accurate means for quantitative characteriz…	UNIV NORTHWESTERN;;UNIV ILLINOIS	ROGERS JOHN A;;REEDER JOHNATHAN T;;BANDODKAR AMAY J;;KIM SUNGBONG;;SEKINE YURINA;;CHOI JUNGIL;;RAY TYLER R;;HOURLIER-FARGETTE AURELIE;;GUTRUF PHILIPP;;LEE KUN HYUCK;;RAJ MILAN	THE BOARD OF TRUSTEES OF THE UNIVERSITY OF ILLINOIS (2018-08-13);;NORTHWESTERN UNIVERSITY (2018-08-08)	https://lens.org/043-176-983-625-297	Granted Patent	yes	18	1	20	159-735-479-775-928;;043-176-983-625-297;;015-838-126-768-618;;141-996-833-278-556;;190-270-816-421-845;;194-749-619-096-975;;009-192-031-834-46X;;145-955-711-147-480;;144-613-669-471-853;;180-088-276-730-597;;068-755-499-993-745;;156-245-382-680-323;;069-420-986-263-231;;013-895-257-748-287;;094-477-946-294-627;;194-989-682-158-190;;198-188-961-624-17X;;137-516-971-385-042;;023-709-773-135-55X;;…	CN;;EP;;KR;;JP;;US;;WO	34	159-735-479-775-928;;114-958-266-659-718;;193-040-220-260-660;;141-996-833-278-556;;190-270-816-421-845;;194-749-619-096-975;;046-659-448-554-680;;009-192-031-834-46X;;145-955-711-147-480;;144-613-669-471-853;;180-088-276-730-597;;068-755-499-993-745;;070-222-774-315-472;;082-533-344-665-126;;133-658-323-636-278;;136-082-982-457-222;;028-288-658-256-590;;013-895-257-748-287;;198-188-961-624-17X;;…	CN;;EP;;KR;;JP;;US;;WO	0	A61B5/14517;;A61B5/0002;;A61B5/0022;;A61B5/0077;;A61B5/01;;A61B5/053;;A61B5/0531;;A61B5/1032;;A61B5/14532;;A61B5/14539;;A61B5/14542;;A61B5/14546;;A61B5/1455;;A61B5/14556;;A61B5/1486;;A61B5/1491;;A61B5/1495;;A61B5/150022;;A61B5/150358;;A61B5/4842;;A61B5/6806;;A61B5/6833;;A61B5/6898;;A61B5/7225;;A61B10/0064;;A61B2560/0214;;A61B2562/0214;;A61B2562/0261;;A61B2562/028;;A61B2562/125;;A61B2562/164;;B01L…	A61B5/00;;A61B5/01;;A61B5/103;;A61B5/145;;A61B5/1455;;A61B5/1477;;A61B5/1486		5	2	005-500-952-231-299;;026-793-234-501-067	27881826;;10.1126/scitranslmed.aaf2593;;pmc5429097;;10.1002/adhm.201770023;;10.1002/adhm.201601355;;28105745	Ahyeon Koh et al., A soft, wearable microfluidic device for the capture, storage, and colorimetric sensing of sweat, Sci. Transl. Med., 2016.;;Jungil Choi et al., Thin, Soft, Skin-Mounted Microfluidic Networks with Capillary Bursting Valves for Chrono-Sampling of Sweat, Adv. Healthcare Mater., 2017.;;EPO, “Supplementary Partial European Search Report for EP Application No. 18809483.3”, Munich, Ge…	ACTIVE	X
50	US	B2	US 11504010 B2	051-036-774-171-466	44887	2022	US 201916723078 A	43819	US 201916723078 A	43819	Wearable health monitoring device	A health monitoring device for detecting blood pressure having a blood pressure sensor including a first fiber Bragg grating (FBG) with a refractive index is configured to be placed in contact with a person's skin approximate to an artery or vein. A baseline sensor that includes a second fiber Bragg grating (FBG) also having a refractive index is configured to be placed in contact with a person's…	EMPNIA INC	BHATTACHARYA MANOJEET	RYTHMOS LLC (2023-09-07);;EMPNIA INC (2020-05-19)	https://lens.org/051-036-774-171-466	Granted Patent	yes	13	3	11	029-997-106-174-851;;055-317-107-730-654;;040-805-055-772-315;;081-217-811-757-572;;157-247-913-623-682;;109-703-704-298-735;;051-036-774-171-466;;146-452-566-873-815;;026-764-656-199-31X;;123-010-296-759-090;;011-891-256-170-646	CN;;EP;;JP;;US;;WO	11	029-997-106-174-851;;055-317-107-730-654;;040-805-055-772-315;;081-217-811-757-572;;157-247-913-623-682;;109-703-704-298-735;;051-036-774-171-466;;146-452-566-873-815;;026-764-656-199-31X;;123-010-296-759-090;;011-891-256-170-646	CN;;EP;;JP;;US;;WO	0	A61B5/021;;A61B5/1455;;A61B5/14532;;A61B5/01;;A61B5/0002;;A61B5/02055;;A61B5/021;;A61B5/02427;;A61B5/14532;;A61B5/14552;;A61B5/681;;A61B5/7425;;A61B2560/0223;;A61B2562/0233	A61B5/0205;;A61B5/00;;A61B5/021;;A61B5/024;;A61B5/145;;A61B5/1455		8	4	066-841-580-567-805;;154-185-170-726-161;;027-626-931-706-55X;;034-065-200-059-21X	10.1109/i2mtc.2015.7151320;;10.1517/14796678.1.1.69;;19804062;;25480767;;10.1016/j.bpa.2014.08.002;;10.1073/pnas.1813053115;;pmc6255203;;30404911	International Search Report and Written Opinion for Int'l Application No. PCT/US2020/065652, titled: Wearable Health Monitoring Device, dated Mar. 10, 2021.;;Katsuragawa, Yui and Hiroaki Ishizawa, “Non-invasive Blood Pressure Measurement by Pulse Wave Analysis Using FBG Sensor,” 2015 IEEE International Instrumentation and Measurement Technology Conference (12MTC) Proceedings, IEEE, May 11, 2015, …	ACTIVE	X
51	US	B2	US 11051760 B2	059-791-692-808-718	44383	2021	US 201715551283 A	42864	US 201715551283 A;;US 201662365978 P;;US 201662333785 P;;CN 2017083636 W	42499	Wearable device for healthcare and method thereof	The present invention relates to a wearable device for healthcare and method for using the device. More specifically, the wearable device is worn on a finger for measuring the health data of the user, selected from one or more of heart rate, blood oxygen saturation, heart rate variability. Based on the measured data, the sleep quality can be monitored and recorded. Disorders such as obstructive s…	BELUN TECH COMPANY LIMITED	CHEN HUNG TAT;;TO KWAN WAI;;GU WENBO	BELUN TECHNOLOGY COMPANY LIMITED (2017-08-09)	https://lens.org/059-791-692-808-718	Granted Patent	yes	112	1	15	011-222-454-452-89X;;059-791-692-808-718;;196-969-461-406-01X;;162-227-810-741-558;;072-920-098-101-575;;069-034-654-056-820;;091-524-412-619-706;;013-927-207-099-673;;118-125-114-275-714;;017-230-606-765-544;;191-524-634-540-695;;063-165-448-705-107;;098-233-159-083-294;;051-620-263-777-418;;056-962-325-514-691	CN;;EP;;TW;;HK;;JP;;US;;WO	24	011-222-454-452-89X;;196-969-461-406-01X;;162-227-810-741-558;;059-791-692-808-718;;191-517-986-906-085;;035-885-553-032-08X;;106-030-562-591-529;;074-205-831-794-256;;072-981-067-090-470;;039-209-486-084-200;;069-034-654-056-820;;118-125-114-275-714;;063-725-127-974-261;;136-690-891-081-548;;013-927-207-099-673;;091-524-412-619-706;;191-524-634-540-695;;086-109-640-890-056;;063-165-448-705-107;;…	CN;;EP;;TW;;HK;;JP;;US;;WO	0	A61B5/0205;;A61B5/1455;;A61B5/02055;;A61B5/02416;;A61B5/4815;;A61B5/6826;;A61B5/0205;;A61B5/1455;;A61B5/02416;;A61B5/02055;;A61B5/4815;;A61B5/02427;;A61B5/14552;;A61B5/02405;;A61B5/02438;;A61B5/6826;;A61B5/746	A61B5/1455;;A61B5/00;;A61B5/0205;;A61B5/024		13	2	122-012-574-875-853;;042-206-552-079-00X	9989371;;10.1093/sleep/22.1.105;;28269047;;10.1109/embc.2016.7591475	A. Johansson “A neutral network for photoplethysmographic respiratory rate monitoring”, Proc. SPIE, 4434, 2001, p. 109-118.;;Ali A. El-Solh et. al., “Validity of neutral network in sleep apnea”, Sleep, 22, 1999, p. 105-111.;;International Search Report of PCT/CN2017/083636 dated Jul. 27, 2017.;;Office Action issued in corresponding China patent application No. 201780000415.0 dated Jul. 14, 2020.;…	ACTIVE	X
52	US	B2	US 11622718 B2	146-876-686-608-126	45027	2023	US 201816758809 A	43397	US 201816758809 A;;US 201762576546 P;;US 2018/0057338 W	43032	Self contained monitor and system for use	A wearable device and methods for providing a wearable device are disclosed. In a first aspect, the wearable device comprises at least one power source, one computer controller and a plurality of instruments that when worn on a user access physiological data from at least the user axilla. The wearable device monitors one or more or a combination of body temperature, pulse, R-R interval, respirati…	VITLS INC	VORSTER WERNER	VITLS INC (2022-01-07)	https://lens.org/146-876-686-608-126	Granted Patent	yes	13	2	10	008-459-896-813-602;;032-395-084-411-421;;076-292-649-494-338;;104-430-356-762-42X;;078-779-828-274-514;;000-509-892-278-368;;001-970-593-382-175;;020-549-263-023-049;;189-340-860-502-779;;146-876-686-608-126	CN;;EP;;US;;CA;;WO	10	032-395-084-411-421;;076-292-649-494-338;;008-459-896-813-602;;104-430-356-762-42X;;000-509-892-278-368;;078-779-828-274-514;;001-970-593-382-175;;020-549-263-023-049;;189-340-860-502-779;;146-876-686-608-126	CN;;EP;;US;;CA;;WO	0	A61B5/02;;A61B5/0205;;A61B5/6833;;A61B5/6823;;A61B5/0008;;A61B5/0006;;A61B5/01;;A61B5/021;;A61B5/024;;A61B5/061;;A61B5/14507;;A61B5/4806;;A61B5/11;;A61B2562/028;;A61B5/266;;A61B5/352;;A61B5/0006;;A61B5/02055;;A61B5/021;;A61B5/02405;;A61B5/02416;;A61B5/0261;;A61B5/029;;A61B5/0816;;A61B5/11;;A61B5/14551;;A61B5/4812;;A61B5/6802;;A61B5/6844;;A61B2560/0214;;A61B2562/0219;;A61B2562/028;;A61B2562/164;;H…	A61B5/00;;A61B5/0205;;A61B5/021;;A61B5/024;;A61B5/026;;A61B5/029;;A61B5/08;;A61B5/11;;A61B5/1455;;A61B5/266;;A61B5/352;;H04B1/38;;H04B1/3827;;H04W12/06		0	0				ACTIVE	X
53	US	B2	US 12011163 B2	014-791-065-262-872	45461	2024	US 202117156306 A	44218	US 202117156306 A	44218	Prediction of tissue irregularities based on biomarker monitoring	Tissue irregularity complication(s) may be predicted based on biomarker measurements obtained before a surgery and/or during the surgery via one or more sensing systems. For example, a computing system may monitor the patient biomarker(s) including tissue perfusion pressure, lactate, oxygen saturation, VO2Max, respiration rate, autonomic tone, sweat rate, heart rate variability, skin conductance,…	CILAG GMBH INT	SHELTON IV FREDERICK E;;ECKERT CHAD E;;HARRIS JASON L	CILAG GMBH INTERNATIONAL (2021-04-05);;ETHICON LLC (2021-02-11)	https://lens.org/014-791-065-262-872	Granted Patent	yes	151	1	7	014-791-065-262-872;;120-584-850-460-349;;079-625-838-618-098;;101-098-323-084-756;;178-137-928-699-422;;198-903-681-635-587;;193-629-506-980-112	CN;;EP;;JP;;US;;WO;;BR	7	014-791-065-262-872;;193-629-506-980-112;;079-625-838-618-098;;101-098-323-084-756;;178-137-928-699-422;;198-903-681-635-587;;120-584-850-460-349	CN;;EP;;JP;;US;;WO;;BR	0	A61B17/320068;;A61B2017/00017;;A61B2017/00221;;A61B2017/00818;;A61B18/1442;;A61B34/10;;A61B34/20;;A61B34/25;;A61B2034/252;;A61B2090/364;;A61B2090/365;;G16H40/63;;G16H40/67;;G16H20/40;;G16H30/20;;G16H30/40;;G16H50/70;;A61B90/36;;A61B2090/365;;A61B5/0537;;A61B5/4878;;A61B17/0686;;A61B17/072;;A61B2017/00026;;A61B2017/07242;;A61B2017/07285;;A61B18/1445;;A61B2017/07214;;A61B34/30;;A61B17/07207;;A61B34…	A61B17/32;;A61B5/00;;A61B5/0537;;A61B5/145;;A61B17/00;;A61B17/068;;A61B17/072;;A61B18/14;;A61B34/00;;A61B34/30;;A61B90/00		44	17	124-607-755-312-393;;015-228-126-191-785;;028-227-034-597-961;;042-400-267-098-649;;019-456-537-493-147;;008-794-338-556-611;;116-758-323-520-461;;172-216-403-662-341;;014-674-862-179-091;;044-766-674-798-473;;017-890-309-077-917;;060-937-127-973-416;;118-612-195-014-791;;047-451-615-122-089;;037-703-390-199-960;;049-581-891-233-63X;;009-831-780-779-400	pmc5621614;;10.1183/20734735.008417;;28966692;;10.1152/jappl.1971.30.4.585;;5572779;;11383809;;10.1016/s0003-4975(01)02474-2;;20609776;;10.1016/j.athoracsur.2010.02.054;;10.1093/europace/eur137;;21616944;;10.1111/jce.12180;;23746064;;10.1161/circep.108.789552;;19808410;;10.1161/circep.107.789552;;pmc4955897;;10.4022/jafib.1331;;27957213;;24028682;;10.1186/cc12894;;pmc3906745;;10.1109/icme.2008.46…	U.S. Appl. No. 17/156,287, filed Jan. 22, 2021, Shelton, et al.;;U.S. Appl. No. 17/156,296, filed Jan. 22, 2021, Shelton, et al.;;U.S. Appl. No. 17/156,300, filed Jan. 22, 2021, Shelton, et al.;;U.S. Appl. No. 17/156,266, filed Jan. 22, 2021, Shelton, et al.;;U.S. Appl. No. 17/156,304, filed Jan. 22, 2021, Shelton, et al.;;U.S. Appl. No. 17/156,318, filed Jan. 22, 2021, Shelton, et al.;;U.S. Appl…	ACTIVE	X
54	US	B2	US 10849519 B2	101-820-064-000-030	44166	2020	US 201615560297 A	42460	US 201615560297 A;;US 201562140671 P;;US 2016/0025333 W	42094	Wearable cardiac electrophysiology measurement devices, software, systems and methods	Disclosed are wearable devices, such as rings and bracelets, for monitoring and diagnosing cardiovascular conditions of a wearer, along with related systems, algorithms and methods. The disclosed wearable devices can continuously monitor the wearer's cardiovascular status by measuring heart rate, motion, blood oxygenation, and/or other properties of the wearer. Disclosed wearable devices can furt…	UNIV OF PITTSBURGH—OF THE COMMONWEALTH SYSTEM OF HIGHER EDUCATION;;UPMC	MENDENHALL GEORGE STUART;;JONES MATTHEW	UNIVERSITY OF PITTSBURGH - OF THE COMMONWEALTH SYSTEM OF HIGHER EDUCATION (2016-05-25);;UPMC (2016-08-01)	https://lens.org/101-820-064-000-030	Granted Patent	yes	11	13	6	049-164-555-787-847;;101-820-064-000-030;;029-666-711-760-393;;070-437-698-241-798;;142-870-133-105-745;;189-505-870-069-756	US;;WO	6	101-820-064-000-030;;049-164-555-787-847;;029-666-711-760-393;;189-505-870-069-756;;070-437-698-241-798;;142-870-133-105-745	US;;WO	0	A61B5/0022;;A61B5/0205;;A61B5/6826;;A61B5/11;;A61B5/14552;;A61B5/7275;;G16H40/67;;A61B5/25;;G16Z99/00;;A61B5/0205;;A61B5/7275;;A61B5/14552;;A61B5/6826;;A61B5/0022;;A61B5/11;;G16H40/67;;A61B5/25;;A61B5/349;;A61B5/389;;G16Z99/00;;A61B5/0006;;A61B5/02438;;A61B5/683;;A61N1/048	A61B5/332;;A61B5/00;;A61B5/0205;;A61B5/024;;A61B5/11;;A61B5/1455;;A61B5/352;;A61N1/04;;G16H40/67;;G16Z99/00		1	0			International Search Report and Written Opinion for related International Application No. PCT/US2016/025333, dated Jun. 27, 2016, 15 pages.	ACTIVE	X
55	US	B2	US 11337681 B2	137-397-124-037-523	44705	2022	US 201816758590 A	43425	US 201816758590 A;;US 201762589702 P;;US 2018/0062178 W	43061	Wearable fluidic device and system for sweat collection and extraction	A sweat collection device includes a flexible body having a first, outwardly facing surface and a second, skin-facing surface, and a sweat collection channel formed in the body, the sweat collection channel having a first end defining a sweat inlet port, and a second end defining a sweat outlet port. The sweat inlet port and the sweat outlet port are configured to be closed and sealed such that t…	EPICORE BIOSYSTEMS INC	MODEL JEFFREY B;;GHAFFARI ROOZBEH;;ARANYOSI ALEXANDER J;;LEE STEPHEN P;;RAJ MILAN S	EPICORE BIOSYSTEMS INC (2020-04-14)	https://lens.org/137-397-124-037-523	Granted Patent	yes	15	1	7	137-397-124-037-523;;151-549-625-489-824;;006-520-814-589-481;;098-788-321-783-088;;099-637-923-704-736;;199-562-694-390-009;;109-878-232-677-490	EP;;US;;WO	7	137-397-124-037-523;;151-549-625-489-824;;006-520-814-589-481;;098-788-321-783-088;;099-637-923-704-736;;199-562-694-390-009;;109-878-232-677-490	EP;;US;;WO	0	A61B5/14517;;A61B5/0077;;A61B5/1118;;A61B5/14532;;A61B5/14539;;A61B5/14546;;A61B5/4266;;A61B5/4845;;A61B10/0064;;A61B10/0096;;A61B2010/0006;;A61B2505/07;;A61B2505/09;;A61B2560/0412;;A61B10/0064;;A61B5/01;;A61B5/14517;;A61B5/14532;;A61B5/14539;;A61B5/14546;;A61B5/1455;;A61B5/4266;;A61B5/4875;;A61B5/743	A61B10/00;;A61B5/00;;A61B5/01;;A61B5/145;;A61B5/1455		3	1	005-500-952-231-299	27881826;;10.1126/scitranslmed.aaf2593;;pmc5429097	International Search Report, Application No. PCT/US2018/062178, dated Feb. 1, 2019.;;Koh et al., “A soft, wearable microfluidic device for the capture, storage, and colorimetric sensing of sweat”, Science Translational Medicine, 2016, vol. 8, pp. 1-13.;;The Extended European Search Report, Application No. 18881519.5, dated Jul. 19, 2021.	ACTIVE	X
57	US	B2	US 11925463 B2	142-966-497-787-333	45363	2024	US 201616303371 A	42601	RU 2016119799 A;;RU 2016000561 W	42513	Method and multisensory device for non-invasive blood glucose level monitoring	The present invention allows for non-invasive monitoring of the blood sugar levels in diabetic patients. At least one heat and waterproof applicator is applied to the skin surface by a dosage pressure. Temporal dynamics of physiological parameters of the local tissue region are measured under the applicator. Temporal dynamics of climatic parameters of the environment are measured simultaneously o…	“INTERCELLULAR SUBSTANCE TECH LABORATORY R&D INTERCELL” LIMITED LIABILITY COMPANY &#x2;;LCM BIOSENSOR TECH INC	MUSIN RAMIL FARITOVICH	"INTERCELLULAR SUBSTANCE TECHNOLOGIES LABORATORY "R&D INTERCELL" LIMITED LIABILITY COMPANY ("R&D INTERCELL" LLC) (2018-09-17)	https://lens.org/142-966-497-787-333	Granted Patent	yes	5	0	7	023-972-174-734-153;;029-260-909-886-426;;198-212-749-416-741;;126-024-748-293-559;;142-254-514-339-087;;048-338-290-070-867;;142-966-497-787-333	EP;;RU;;US;;WO	7	023-972-174-734-153;;029-260-909-886-426;;198-212-749-416-741;;126-024-748-293-559;;142-254-514-339-087;;048-338-290-070-867;;142-966-497-787-333	EP;;RU;;US;;WO	0	A61B5/00;;A61B5/14532;;A61B2560/0257;;A61B2560/0252;;A61B5/1495;;A61B5/443;;A61B5/0531;;A61B5/01;;A61B5/4866;;A61B5/681;;A61B5/01;;A61B5/0006;;A61B5/015;;A61B5/02055;;A61B5/0533;;A61B5/14532;;A61B5/4866;;A61B5/6831;;A61B2562/0271;;A61B2562/029;;A61B2562/063	A61B5/145;;A61B5/00;;A61B5/01;;A61B5/0205;;A61B5/0533		7	1	086-264-752-399-376	25169694;;10.1016/j.ccell.2014.05.002	English translation of TW 201315991, patents.google.com, 10 pages, printed on Mar. 8, 2023 (Year: 2023).;;International Search Report for PCT/RU2016/000561, dated Feb. 9, 2017, 4 pages.;;Hamlin Shannan K. et al., “Monitoring Tissue Perfusion and Oxygenation”, 2014, p. 353, 354.;;Musin R.F., et al., “Natural Water Diffusion Through the Stratum Corneum of the Human Body Epidermis and its Electrical…	ACTIVE	X
58	US	B2	US 12114977 B2	156-997-640-591-537	45580	2024	US 202117372450 A	44387	US 202117372450 A	44387	System and method for the real-time, noninvasive and continuous in vivo sensing of stress	The present disclosure pertains to a wearable electronic device for the novel sensing of physiologically presented symptoms of stress corresponding to changes in a finger skin temperature biomarker.	CLARK ANTHONY L	CLARK ANTHONY L		https://lens.org/156-997-640-591-537	Granted Patent	yes	82	0	2	156-997-640-591-537;;096-032-235-016-461	US	2	156-997-640-591-537;;096-032-235-016-461	US	0	A61B5/0002;;A61B5/01;;A61B5/165;;A61B5/6826;;A61B5/7405;;A61B5/742;;A61B2562/0271;;A61B5/165;;A61B5/01;;A61B5/6826;;A61B2562/0271;;A61B5/7405;;A61B5/0002;;A61B5/742	A61B5/16;;A61B5/00;;A61B5/01		30	20	100-566-969-540-069;;087-234-934-571-180;;085-940-242-158-446;;018-761-498-970-805;;008-425-998-983-99X;;026-587-993-125-35X;;059-029-632-199-880;;048-158-911-713-928;;072-195-091-839-762;;141-481-861-398-341;;069-572-775-019-784;;064-035-703-672-762;;123-922-949-335-335;;027-486-616-504-331;;105-519-395-227-072;;087-021-460-758-058;;072-195-091-839-762;;141-481-861-398-341;;064-035-703-672-762;;…	10.1109/icc.2018.8423001;;10.1109/jiot.2018.2868235;;31900867;;pmc7250801;;10.1007/s12529-019-09843-x;;pmc5316555;;10.3389/fpsyg.2017.00213;;28265249;;10.7763/ijmlc.2013.v3.267;;pmc4816215;;10.1038/nn.4087;;26404712;;pmc2848393;;20350028;;10.1037/a0018555;;4303377;;10.1097/00006842-196809000-00020;;10.1016/b978-0-444-53491-0.00002-x;;24095112;;10.1016/b978-0-444-53491-0.00001-8;;24095111;;1124775…	Mahmud, Md Shaad et al., SensoRing: An Integrated Wearable System for Continuous Measurement of Physiological Biomarkers, IEEE (Year: 2018).;;Mahmud, Md Shaad et al., An Integrated Wearable Sensor for Unobtrusive Continuous Measurement of Autonomic Nervous System, IEEE Internet of Things Journal, vol. 6, No. 1, pp. 1104-1113 (Year: 2019).;;Stress Market, Stress Thermometer (TM), Nov. 27, 2020, ht…	ACTIVE	X
59	US	B2	US 10188325 B2	004-777-025-114-978	43494	2019	US 201514953275 A	42335	US 201514953275 A;;US 201213416963 A;;US 201462085183 P;;US 201462085190 P	40977	Wearable, noninvasive glucose sensing methods and systems	New wearable systems for noninvasive glucose sensing include an ultrasound generator, an ultrasound detector and a feedback unit. Methods for noninvasive glucose sensing using a wearable device include measuring a thickness (geometrical and/or optical) of a target tissue or a time of flight of ultrasound or optical pulses in the target tissue and determining a glucose value from the thickness of …	ESENALIEV RINAT O	ESENALIEV RINAT O		https://lens.org/004-777-025-114-978	Granted Patent	yes	4	4	2	004-777-025-114-978;;122-965-053-385-077	US	4	122-965-053-385-077;;004-777-025-114-978;;124-817-204-518-155;;034-061-077-232-372	US	0	A61B5/14532;;A61B5/0002;;A61B5/0059;;A61B5/0095;;A61B5/1075;;A61B5/1455;;A61B5/6801;;A61B5/6803;;A61B5/681;;A61B5/7264;;A61B5/7445;;A61B5/7465;;A61B8/10;;A61B8/4227;;A61B8/5223;;G16H50/30;;A61B5/14532;;A61B5/0002;;A61B5/0059;;A61B5/0095;;A61B5/1075;;A61B5/1455;;A61B5/6801;;A61B5/6803;;A61B5/681;;A61B5/7264;;A61B5/7445;;A61B5/7465;;A61B8/10;;A61B8/4227;;A61B8/5223	A61B5/145;;A61B5/00;;A61B5/107;;A61B5/1455;;A61B8/00;;A61B8/08;;A61B8/10		0	0				ACTIVE	X
60	US	B2	US 11559228 B2	028-376-004-926-276	44950	2023	US 201715807486 A	43047	US 201715807486 A;;US 201662433756 P	42717	Augmented and virtual reality eyewear, systems, and methods for delivering polarized light and determining glucose levels	Various embodiments of a user-wearable device can comprise a frame configured to mount on a user. The device can include a display attached to the frame and configured to direct virtual images to an eye of the user. The device can also include a light source configured to provide polarized light to the eye of the user and that the polarized light is configured to reflect from the eye of the user.…	MAGIC LEAP INC	ROBAINA NASTASJA U;;SAMEC NICOLE ELIZABETH;;BAERENRODT MARK	MAGIC LEAP INC (2020-07-13)	https://lens.org/028-376-004-926-276	Granted Patent	yes	67	1	30	025-449-532-375-389;;120-179-011-050-155;;196-635-053-023-175;;043-733-632-121-280;;015-227-771-596-713;;054-303-138-210-236;;079-558-037-454-09X;;186-996-085-390-077;;042-621-699-791-390;;104-477-692-570-732;;149-142-975-146-235;;000-169-269-755-208;;068-680-231-088-88X;;112-764-708-736-875;;047-476-351-283-452;;038-193-589-265-346;;021-869-874-177-521;;029-549-568-235-605;;194-538-397-923-102;;…	CN;;KR;;EP;;JP;;US;;AU;;CA;;IL;;WO	30	025-449-532-375-389;;120-179-011-050-155;;196-635-053-023-175;;043-733-632-121-280;;015-227-771-596-713;;054-303-138-210-236;;079-558-037-454-09X;;186-996-085-390-077;;042-621-699-791-390;;104-477-692-570-732;;149-142-975-146-235;;000-169-269-755-208;;068-680-231-088-88X;;112-764-708-736-875;;047-476-351-283-452;;038-193-589-265-346;;021-869-874-177-521;;029-549-568-235-605;;194-538-397-923-102;;…	CN;;KR;;EP;;JP;;US;;AU;;CA;;IL;;WO	0	A61B5/0205;;A61B5/145;;A61B5/14558;;A61B5/14532;;A61B5/6803;;A61B5/486;;A61B5/0816;;A61B5/4266;;A61B5/024;;A61B5/02055;;A61B5/6821;;A61B2560/0462;;A61B5/14558;;A61B5/145;;A61B5/02055;;A61B5/1455;;A61B5/4266;;A61B5/0205;;A61B2560/0462;;G06T19/006;;A61B5/14532;;A61B5/024;;A61B5/0816;;A61B5/6803;;A61B5/6821;;A61B5/486;;A61B5/14558;;A61B5/02055;;A61B5/14532;;A61B5/1455;;A61B5/4266;;A61B5/486;;A61B5/6…	A61B5/1455;;A61B5/00;;A61B5/0205;;A61B5/024;;A61B5/08;;A61B5/145;;G06T19/00		21	5	049-004-482-950-013;;045-654-320-961-421;;129-941-718-264-869;;113-455-635-299-703;;146-845-514-932-69X	10.1366/0003702054615133;;16105211;;10.1117/1.1626664;;14715061;;10.1162/pres.1997.6.4.355;;10.1093/oso/9780195075557.003.0015;;10.1145/332040.332443	International Search Report and Written Opinion for PCT Application No. PCT/US2017/60695, dated Jan. 22, 2018 in 12 pages.;;International Preliminary Report on Patentability for PCT Application No. PCT/US2017/60695, dated Jun. 18, 2019. in 6 pages.;;Blamire, Prof. John “Exporing Life @ BIOdotEDU,” 2004. http://www.brooklyn.cuny.edu/bc/ahp/LAD/C4c/C4c_polarizer.html in 4 pages.;;Collett E., “The G…	ACTIVE	X
61	US	B2	US 11707262 B2	041-546-196-562-373	45132	2023	US 202117329252 A	44341	US 202117329252 A;;US 202063083403 P	44099	Systems and methods for real-time sweat sampling and analysis	Systems and methods for continuous real-time sweat sampling and analysis are disclosed. In one case, a sweat collection device and method of using the same are provided. The sweat collecting device has a main body with a sweat-collecting surface that is placed adjacent the person's skin. A sweat collecting tube is provided. The first end of the sweat collecting tube is joined to a bore in the mai…	US GOV AIR FORCE;;US AIR FORCE	HARSHMAN SEAN;;QUALLEY ANTHONY;;BOWMAN AMANDA;;STRAYER KRAIG;;PITSCH RHONDA;;BROTHERS MICHAEL	GOVERNMENT OF THE UNITED STATES AS REPRESENTED BY THE SECRETARY OF THE AIR FORCE (2020-09-25)	https://lens.org/041-546-196-562-373	Granted Patent	yes	20	0	4	170-516-649-361-575;;051-542-950-673-476;;041-546-196-562-373;;148-195-446-006-90X	US	4	170-516-649-361-575;;051-542-950-673-476;;041-546-196-562-373;;148-195-446-006-90X	US	0	A61B10/0064;;A61B5/4266;;A61B5/6824;;A61B5/6831;;A61B10/0064;;A61B5/4266;;A61B5/6831;;A61B5/6824;;A61B5/443	A61B10/00;;A61B5/00		21	21	011-357-989-921-750;;054-820-549-059-169;;049-315-069-940-434;;079-539-783-958-763;;085-893-702-561-14X;;028-218-971-992-830;;072-461-770-839-771;;093-606-765-771-211;;043-232-409-788-255;;081-725-472-695-346;;002-282-765-638-024;;063-337-647-817-855;;027-656-162-425-119;;123-894-501-479-263;;056-490-993-147-548;;109-786-070-011-240;;039-121-122-498-713;;067-577-247-734-987;;013-169-330-661-190;;…	4821728;;535594;;10.1007/bf00423292;;10.1152/jappl.1984.56.5.1302;;6327585;;9029235;;10.1152/jappl.1997.82.1.336;;10.1046/j.1365-201x.2002.00927.x;;11851595;;14985998;;10.1007/s00421-004-1057-x;;15329055;;10.1111/j.1365-201x.2004.01305.x;;16237263;;10.2114/jpa.24.541;;17225006;;10.1590/s0100-879x2007000100017;;22194922;;pmc3237544;;10.1371/journal.pone.0028824;;10.1111/ics.12019;;23075272;;10.101…	Pandolf, et al., Physiological Strain During Light Exercise in Hot-Humid Environments, Aerospace Medicine, Apr. 1974, pp. 359-365, vol. 45, No. 4, publisher unknown.;;Liappis, et al., Quantitative Study of Free Amino Acids in Human Eccrine Sweat Excreted from the Forearms of Healthy Trained and Untrained Men During Exercise, European Journal of Applied Physiology, Oct. 1979, pp. 227-234, vol. 42,…	ACTIVE	X
62	US	B1	US 11197625 B1	193-405-249-093-965	44544	2021	US 201816179057 A	43406	US 201816179057 A;;US 201762587294 P	43055	Apparatus for automated glucose tolerance testing	Devices are provided to automatically access blood from beneath or within skin. These devices include a plurality of injectors configured to drive needles into the skin and draw samples of blood into the device. These devices additionally include a plurality of sensors which can detect a target analyte in the blood samples received by the device. These devices further include a user interface, wh…	VERILY LIFE SCIENCES LLC	SCHLEICHER BRETT;;KRASNOW BENJAMIN;;PEETERS ERIC;;SMITH PETER	VERILY LIFE SCIENCES LLC (2018-10-18)	https://lens.org/193-405-249-093-965	Granted Patent	yes	4	12	1	193-405-249-093-965	US	1	193-405-249-093-965	US	0	A61B5/14532;;A61B5/14503;;A61B5/1455;;A61B5/150022;;A61B5/150099;;A61B5/150229;;A61B5/150412;;A61B5/150572;;A61B5/150854;;A61B5/150862;;A61B5/15109;;A61B5/15115;;A61B5/15151;;A61B5/15163;;A61B5/155;;A61B5/681;;A61B5/14532;;A61B5/14503;;A61B5/14546;;A61B5/1455;;A61B5/150374;;A61B5/681	A61B5/1455;;A61B5/00;;A61B5/145;;A61B5/15		5	3	016-766-211-652-464;;042-067-246-362-74X;;002-458-803-458-937	10.2337/dc12-0643;;pmc3661807;;23321216;;24876538;;10.1177/1932296813516182;;pmc4454109;;28345030;;10.1126/sciadv.1601314;;pmc5342654	National Health and Nutrition Examination Survey (NHANES), Oral Glucose Tolerance Test (OGTT) Procedures Manual, CDC, Jan. 2007.;;Bethel, MD et al., “Evaluation of a Self-Administered Oral Glucose Tolerance Test”, Diabetes Care, vol. 36, Jun. 2013.;;Sobel, MD, “Accuracy of a Novel Noninvasive Multisensor Technology to Estimate Glucose in Diabetic Subjects During Dynamic Conditions”, Journal of Di…	ACTIVE	X
64	US	B1	US 11191466 B1	154-088-649-677-66X	44537	2021	US 201916457582 A	43644	US 201916457582 A	43644	Determining mental health and cognitive state through physiological and other non-invasively obtained data	Physiological variables, metrics, biomarkers, and other data points can be used, in connection with a non-invasive wearable device, to screen for, and predict, mental health issues and cognitive states. In addition to metrics such as heart rate, sleep data, activity level, gamification data, and the like, information such as text message and email data, as well as vocal data obtained through a ph…	FITBIT INC	HENEGHAN CONOR JOSEPH;;STATAN ALEXANDER;;CHARLESWORTH JONATHAN DAVID	FITBIT INC (2019-07-01)	https://lens.org/154-088-649-677-66X	Granted Patent	yes	35	28	2	065-043-806-371-133;;154-088-649-677-66X	US	2	065-043-806-371-133;;154-088-649-677-66X	US	0	G16H50/20;;A61B5/01;;A61B5/02055;;A61B5/02416;;A61B5/1118;;A61B5/14546;;A61B5/14551;;A61B5/162;;A61B5/165;;A61B5/4815;;A61B5/6802;;A61B5/7267;;A61B5/742;;G16H10/20;;G16H20/10;;G16H20/30;;G16H20/70;;G16H40/67;;G16H50/30;;A61B5/165;;A61B5/01;;A61B5/02055;;A61B5/02416;;A61B5/1118;;A61B5/14546;;A61B5/14551;;A61B5/162;;A61B5/4815;;A61B5/6802;;A61B5/7267;;A61B5/742;;G16H50/30	A61B5/16;;A61B5/00;;A61B5/01;;A61B5/0205;;A61B5/024;;A61B5/11;;A61B5/145;;A61B5/1455;;G16H50/30		0	0				ACTIVE	X
65	US	B2	US 11363992 B2	152-583-079-449-301	44733	2022	US 201816209906 A	43438	US 201816209906 A;;US 201762594498 P	43073	Wearable device utilizing flexible electronics	A wearable device utilizing flexible electronics is disclosed. The wearable device may comprise a flexible matrix material and may include sensors for measuring biometric measurements of an individual, an accelerometer for measuring an acceleration of a body part to which the wearable device is attached, a wireless transmitter, a flexible power source, and a microcontroller. During an activity, t…	ADVANCING TECH LLC	ALPHONSE RICKY;;MELROSE KELSEY;;CHOU CATHERINE;;SCHIMMEL NOAH;;SIRIPURAM RAMAMURTHY;;TRAN ANTHONY;;FARAHDEL BRITNY;;SMITH DALTON;;WANG DANICE;;MEHAN KUNAL;;VIRTUE THEODORE	ADVANCING TECHNOLOGIES LLC (2017-11-29)	https://lens.org/152-583-079-449-301	Granted Patent	yes	6	0	5	168-649-088-488-062;;152-583-079-449-301;;026-102-233-459-48X;;197-686-240-962-959;;133-117-310-840-868	US	5	168-649-088-488-062;;152-583-079-449-301;;133-117-310-840-868;;197-686-240-962-959;;026-102-233-459-48X	US	0	A61B5/02438;;A61B2562/0219;;A61B5/7275;;A61B5/02405;;A61B5/0205;;A61B5/14514;;A61B5/4875;;A61B5/14542;;A61B5/7278;;A61B5/6802;;A61B5/1118;;A61B5/22;;A61B5/746;;A61B5/7235;;A61B5/742;;A61B5/024;;A61B2562/0219;;A61B2560/0214;;A61B5/6833;;A61B2562/164;;A61B5/0002;;A61B5/02438	A61B5/0205;;A61B5/00;;A61B5/024;;A61B5/11;;A61B5/145;;A61B5/22		0	0				ACTIVE	X
66	US	B2	US 12036035 B2	090-035-980-710-141	45489	2024	US 201916962832 A	43481	US 201916962832 A;;US 201862618013 P;;US 2019/0013876 W	43116	Systems, devices and methods for estimating blood glucose concentrations from signals of sensors deployed in tissue	Disclosed are systems, devices and methods for estimating blood glucose parameters, including blood glucose concentration glucose sensor signals. In some aspects, a method for estimating blood glucose concentration from signals of glucose sensors includes obtaining a set of time-series values that includes tissue glucose sensor values from a glucose sensor and reference blood glucose concentratio…	UNIV CALIFORNIA	GOUGH DAVID A;;ABBASI SHAGHAYEGH;;HEINZ STEFANIE	THE REGENTS OF THE UNIVERSITY OF CALIFORNIA (2019-01-17)	https://lens.org/090-035-980-710-141	Granted Patent	yes	8	0	3	098-388-759-094-399;;090-035-980-710-141;;149-324-718-568-047	US;;WO	3	098-388-759-094-399;;090-035-980-710-141;;149-324-718-568-047	US;;WO	0	A61B5/1455;;A61M5/14244;;A61M5/1723;;A61M2005/1726;;A61M2005/14208;;A61M2205/502;;A61M2205/3576;;A61M2230/201;;A61B5/14532;;A61B5/1468;;A61B5/725;;A61B5/7275;;A61B5/7221;;G16H50/30;;G16H20/17;;G16H40/67;;G16H10/40;;G16H50/30;;G16H50/70;;G16H50/20;;G16H40/40;;G06F16/2365;;A61B5/14532;;A61B5/14865;;A61B5/4839;;A61B5/681;;A61B5/6833;;A61B5/7221;;A61B5/7275;;A61M5/14244;;A61M5/1723;;A61M2205/3576;;A6…	A61M5/172;;A61B5/00;;A61B5/145;;A61B5/1486;;A61M5/142;;G06F16/23;;G16H10/40;;G16H20/17;;G16H40/40;;G16H40/67;;G16H50/20;;G16H50/30;;G16H50/70		12	9	033-386-553-196-720;;017-950-014-792-456;;147-416-484-484-339;;006-107-012-486-158;;001-214-453-138-943;;033-386-553-196-720;;021-480-225-492-198;;073-302-850-670-732;;137-925-192-709-172	pmc4607511;;10.2337/dc07-2401;;18339974;;10.2337/diabetes.48.3.445;;10078542;;23172973;;10.2337/dc12-0736;;pmc3609535;;10.1114/1.1535411;;12572659;;pmc4528300;;20668297;;10.1126/scitranslmed.3001148;;pmc4607511;;10.2337/dc07-2401;;18339974;;10.1016/j.biomaterials.2014.05.012;;24998180;;pmc4527688;;10.1109/tbme.2016.2619333;;pmc5561509;;28026743;;27775510;;10.1089/dia.2007.0256;;18260771	Kovatchev et al. “Comparison of the Numerical and Clinical Accuracy of Four Continuous Glucose Monitors” Diabetes Care, Jun. 2008: 31(6): pp. 1160-1164 (“Kovatchev”). (Year: 2008).;;Bremer et al. “Perspectives in Diabetes: Is Blood Glucose Predictable From Previous Values?” Diabetes, Mar. 1999, 48, 445-451.;;Facchinetti et al. “Real-Time Improvement of Continuous Glucose Monitoring Accuracy” Diab…	ACTIVE	X
67	US	B2	US 12076136 B2	124-926-665-592-393	45538	2024	US 202217731013 A	44678	US 202217731013 A;;US 202016743539 A	43845	Smart watch	Systems and methods are disclosed for monitoring a user by calibrating one or more noninvasive sensors to track a user glucose level at one or more user physical activity conditions; generating a calibration based on the one or more user conditions; and in real time detecting a current user condition and applying the calibration to accurately estimate the user glucose or insulin level.	TRAN BAO	TRAN BAO		https://lens.org/124-926-665-592-393	Granted Patent	yes	6	2	4	047-042-128-877-946;;062-219-995-574-550;;124-926-665-592-393;;040-847-470-500-531	US	4	047-042-128-877-946;;062-219-995-574-550;;124-926-665-592-393;;040-847-470-500-531	US	0	A61B5/14532;;A61B5/14503;;A61B5/1495;;A61B5/4839;;A61B5/14546;;A61B5/0205;;A61B5/296;;A61B2562/0219;;A61B5/6801;;A61B5/0531;;A61B5/1118;;A61B5/01;;A61B5/14532;;A61B5/0255;;A61B5/0075;;A61B2562/0238;;A61B5/0017;;A61B5/0024;;A61B5/6801;;A61B5/0006	A61B5/145;;A61B5/00;;A61B5/0255		0	0				ACTIVE	X
68	US	B2	US 11707217 B2	113-028-206-856-253	45132	2023	US 202016959212 A	43837	US 202016959212 A;;US 201962789605 P;;IB 2020050088 W	43473	Diagnosis and effectiveness of monitoring attention deficit hyperactivity disorder	A method and a system are provided for taking biomarker measurements of patients who have ADHD. Mathematical analysis (e.g., pattern recognition, machine learning and AI algorithms) of the biomarker measurements is used to create a unique personal prediction model and data set for an individual patient. The unique personal data set is used to diagnose and monitor a particular problem of the indiv…	ILURIA LTD	LEVY HAGAY;;LEVY BIRKAT KLIMSHTEIN		https://lens.org/113-028-206-856-253	Granted Patent	yes	8	0	9	173-642-897-474-903;;113-028-206-856-253;;130-788-242-990-853;;108-000-744-611-979;;032-613-924-355-34X;;083-481-804-594-539;;194-263-910-687-260;;044-108-053-777-384;;003-000-665-466-024	CN;;KR;;EP;;US;;WO	9	130-788-242-990-853;;113-028-206-856-253;;173-642-897-474-903;;083-481-804-594-539;;032-613-924-355-34X;;108-000-744-611-979;;194-263-910-687-260;;044-108-053-777-384;;003-000-665-466-024	CN;;KR;;EP;;US;;WO	0	A61B5/024;;G16H50/20;;G16H50/30;;G01N33/6896;;G01N2800/305;;A61B5/168;;A61B5/0533;;G16H20/70;;G16H20/70;;G16H50/20;;G16H50/30;;G16H50/50;;G16H50/70;;A61B5/168;;A61B5/4848;;A61B5/4839;;A61B5/7275;;G01N33/6896;;A61B5/024;;A61B5/0533;;G06N20/00;;G01N2800/305;;G16H50/70;;G16H50/20;;G16H20/70;;G06N20/00;;A61B5/02055;;A61B5/168;;A61B5/4848;;A61B5/7267;;A61B2560/0228	G16H50/70;;A61B5/00;;A61B5/0205;;A61B5/16;;G06N20/00;;G16H20/70;;G16H50/20		5	3	004-477-951-102-242;;135-408-856-839-183;;090-085-926-355-471	29154696;;10.1177/1087054717740632;;10.1177/0962280217723945;;28812439;;pmc5895541;;10.30773/pi.2019.02.26.1;;pmc6539261;;31132841	Xioa, Cao “Optimization and Machine Learning Methods for Medical and Healthcare Applications” University of Washington, ProQuest 10244899 (Year: 2017).;;PCT Search Report and Written Opinion PCT/IB2020/050088, dated May 12, 2020.;;Yasumura et al., “Applied Machine Learning Method to Predict Children With ADHD Using Prefrontal Cortex Activity: A Multicenter Study in Japan”, J Atten Disord. Nov. 1,…	ACTIVE	X
69	US	B2	US 10595777 B2	055-391-309-153-758	43914	2020	US 201715588508 A	42860	US 201715588508 A;;US 201662333011 P	42496	Method and device for hydration monitoring	Provided herein are methods and devices operable to monitor the hydration of a user. The wearable device for hydration monitoring includes an emitting component operable to emit light having at least three different wavelengths, a sensor operable to receive a reflected portion of the emitted light, and a processor operable to receive signals from the sensor. At least one of the wavelengths is in …	PERFORMANCE ATHLYTICS;;LVL TECH INC	XAVIER DA SILVEIRA PAULO E;;SCHMITT JOSEPH;;OLSON BYRON;;RAJAN NITHIN O;;FRECKLETON DUSTIN M;;CLIFT-REAVES DAVID E	HAPPY HEALTH INC (2019-10-11);;LVL TECHNOLOGIES INC (2017-07-21);;PERFORMANCE ATHLYTICS (2019-08-02)	https://lens.org/055-391-309-153-758	Granted Patent	yes	2	0	2	076-724-862-082-355;;055-391-309-153-758	US	2	076-724-862-082-355;;055-391-309-153-758	US	0	A61B5/4875;;A61B5/14542;;A61B5/14546;;A61B5/1455;;A61B5/443;;A61B5/6824;;A61B2562/043;;A61F13/42;;A61F13/84;;G01N21/359;;G01N21/49;;G01N33/49;;A61B5/4875;;A61B5/14542;;A61B5/14546;;A61B5/1455;;A61B5/443;;A61B5/6824;;A61B2562/043;;A61F13/42;;A61F13/84;;G01N21/3554;;G01N21/359;;G01N21/49;;G01N33/49	A61B5/00;;A61B5/026;;A61B5/0295;;A61B5/145;;A61B5/1455;;A61F13/42;;A61F13/537;;A61F13/84;;G01N21/3554;;G01N21/359;;G01N21/49;;G01N33/49		0	0				ACTIVE	X
70	US	B1	US 12073021 B1	115-518-546-486-011	45531	2024	US 202318170313 A	44973	US 202318170313 A	44973	Conductive matter movement tracking using RF sensors	A wearable device that tracks body movement is disclosed. The device includes a housing and a connection member. The connection member is coupled to the housing, and the connection member enables the device to be coupled to a user's body part. This body part is associated with the conductive matter. The device includes an RF sensor in the housing. The RF sensor oscillates at a preselected frequen…	MICROSOFT TECHNOLOGY LICENSING LLC	JADIDIAN JOUYA;;D'AMONE GABRIELE	MICROSOFT TECHNOLOGY LICENSING LLC (2023-02-09)	https://lens.org/115-518-546-486-011	Granted Patent	yes	5	0	4	044-843-424-906-01X;;128-251-255-680-705;;009-301-969-760-06X;;115-518-546-486-011	US;;WO	4	044-843-424-906-01X;;128-251-255-680-705;;115-518-546-486-011;;009-301-969-760-06X	US;;WO	0	G06F3/017;;G06F3/011;;A61B5/0816;;A61B5/6826;;A61B5/6838;;G06F3/014;;A61B5/05;;A61B5/6824;;A61B5/0535;;A61B5/0205;;A61B5/14532;;A61B5/024;;A61B5/021;;A61B5/1107;;A61B5/05;;A61B5/1126;;A61B5/6826;;G06F3/014;;G06T11/00	G06F3/01;;A61B5/00;;A61B5/05;;A61B5/11;;G06T11/00		3	1	189-417-900-925-593	10.1145/3526113.3545665	Invitation to Pay Additional Fees received for PCT Application No. PCT/US2024/014912, May 22, 2024, 13 pages.;;Kim, et al., “Etherpose: Continuous Hand Pose Tracking with Wrist-Worn Antenna Impedance Characteristic Sensing”, Proceedings of the 35th Annual ACM Symposium on User Interface Software and Technology, Oct. 29-Nov. 2, 2022, 12 pages.;;International Search Report and Written Opinion recei…	ACTIVE	X
71	US	B2	US 11605882 B2	148-747-259-091-689	44999	2023	US 202117248466 A	44222	US 202117248466 A;;US 201615231906 A	42591	Antenna configuration for compact glucose monitor	A wearable glucose monitor may include a compact having an antenna positioned on a housing of the glucose monitor to allow the size of the antenna to be larger than a printed circuit board of the glucose monitor positioned internal to the housing. The antenna may be communicatively coupled to a wireless communication device, such as a transceiver on the PCB, to transmit glucose level measurements…	VERILY LIFE SCIENCES LLC	JOW UEI-MING;;FATHI MARYAM	DEXCOM INC (2020-03-05);;VERILY LIFE SCIENCES LLC (2016-08-06)	https://lens.org/148-747-259-091-689	Granted Patent	yes	24	3	10	179-267-981-335-662;;134-876-133-908-422;;196-777-364-226-31X;;148-747-259-091-689;;042-410-606-898-691;;181-653-607-091-589;;141-750-502-289-322;;122-725-118-144-029;;182-656-950-406-189;;033-938-987-231-821	TW;;US;;WO	10	134-876-133-908-422;;179-267-981-335-662;;042-410-606-898-691;;148-747-259-091-689;;196-777-364-226-31X;;033-938-987-231-821;;141-750-502-289-322;;122-725-118-144-029;;182-656-950-406-189;;181-653-607-091-589	TW;;US;;WO	0	A61B5/686;;A61B5/076;;A61B5/14503;;A61B5/14532;;H01Q1/2216;;H01Q7/00;;H01Q1/273;;H04B5/70;;H04B5/26;;A61B5/076;;A61B5/14532;;A61B5/14503;;H01Q1/2216;;H01Q7/00;;A61B5/686;;H04B5/26;;H04B5/70;;H01Q1/2208;;H01Q1/273;;H01Q1/38	H01Q1/22;;A61B5/00;;A61B5/07;;A61B5/145;;H01Q1/27;;H01Q1/38;;H01Q7/00;;H04B5/00		10	0			U.S. Appl. No. 15/231,906 , “Advisory Action”, dated Feb. 6, 2020, 7 pages.;;U.S. Appl. No. 15/231,906 , “Final Office Action”, dated Oct. 21, 2019, 8 pages.;;U.S. Appl. No. 15/231,906 , “Non-Final Office Action”, dated Apr. 2, 2020, 11 pages.;;U.S. Appl. No. 15/231,906 , “Non-Final Office Action”, dated Apr. 5, 2019, 9 pages.;;U.S. Appl. No. 15/231,906 , “Notice of Allowance”, dated Oct. 13, 202…	ACTIVE	X
72	US	B2	US 11419527 B2	074-807-013-582-84X	44796	2022	US 201916591006 A	43740	KR 20180117375 A	43375	Apparatus and method for estimating blood concentration of analyte, and apparatus and method for generating model	An apparatus for estimating blood concentration may include an optical sensor configured to emit light towards a skin surface of a user, and detect an optical signal reflected by the skin surface of the user, and a processor configured to select an interval-specific blood concentration estimation model, from among a plurality of interval-specific blood concentration estimation models, based on an…	SAMSUNG ELECTRONICS CO LTD	LEE JOON HYUNG;;JUNG WON JONG;;NAMKOONG KAK;;NAM JUNG YONG;;LEE YEOL HO;;CHANG KI YOUNG	SAMSUNG ELECTRONICS CO. LTD (2019-09-23)	https://lens.org/074-807-013-582-84X	Granted Patent	yes	19	0	6	068-993-747-276-651;;051-995-939-149-990;;074-807-013-582-84X;;075-622-246-955-817;;199-629-696-177-088;;055-727-286-447-177	KR;;EP;;US	6	068-993-747-276-651;;051-995-939-149-990;;074-807-013-582-84X;;199-629-696-177-088;;055-727-286-447-177;;075-622-246-955-817	KR;;EP;;US	0	A61B5/1455;;A61B5/14532;;A61B5/1495;;A61B5/14546;;A61B5/681;;A61B5/7275;;A61B5/0075;;A61B5/1455;;A61B5/4872;;A61B5/14532;;A61B5/742;;A61B5/14532;;A61B5/14546;;A61B5/1455;;A61B2562/0238;;G05B17/02;;A61B5/7264	A61B5/1455;;A61B5/00;;A61B5/145;;G05B17/02		4	2	026-532-804-702-499;;059-812-293-873-192	16158407;;10.1002/sim.2232;;10.1038/sj.ejcn.1601466;;12428182	Lloyd J. Edwards et al., “A method for fitting regression splines with varying polynomial order in the linear mixed model”, Sep. 12, 2005, Wiley Inter Science, Statistics in Medicine DOI: 10.1002/sim.2232, pp. 513-527, (15 pages total).;;G Bedogni et al., “Accuracy of an eight-point tactile-electrode impedance method in the assessment of total body water”, European Journal of Clinical Nutrition, …	ACTIVE	X
74	US	B2	US 10631753 B2	063-488-526-133-957	43949	2020	US 201816118827 A	43343	US 201816118827 A;;US 201862646510 P	43181	Blood glucose tracking system	A blood glucose tracking system and method measures emitted microwave energy transmitted to and accepted by blood vessels in a desired target area of a patient in order to determine, in real time and in vivo, appropriate blood glucose levels. A measurement unit comprises a transmitter operatively connected to an antenna to deliver energy towards appropriate subcutaneous blood vessels. The measure…	CHASE ARNOLD	CHASE ARNOLD		https://lens.org/063-488-526-133-957	Granted Patent	yes	7	0	20	091-254-778-328-623;;054-348-821-561-582;;095-421-118-116-722;;091-857-619-302-568;;063-837-489-602-509;;108-581-770-366-071;;116-975-564-216-218;;043-164-256-969-685;;128-242-336-701-737;;009-339-319-378-081;;065-479-937-446-710;;063-488-526-133-957;;186-656-033-264-30X;;087-092-784-424-36X;;003-878-092-215-054;;031-807-450-431-054;;168-663-507-761-870;;015-223-460-380-191;;061-151-145-024-072;;…	CN;;EP;;KR;;JP;;US;;CA;;IL;;WO	25	095-421-118-116-722;;054-348-821-561-582;;068-993-877-900-563;;091-857-619-302-568;;170-059-702-309-901;;116-975-564-216-218;;143-471-162-783-498;;128-242-336-701-737;;063-488-526-133-957;;065-479-937-446-710;;186-656-033-264-30X;;003-878-092-215-054;;015-223-460-380-191;;061-151-145-024-072;;110-607-765-813-492;;091-254-778-328-623;;063-837-489-602-509;;108-581-770-366-071;;043-164-256-969-685;;…	CN;;EP;;KR;;JP;;US;;CA;;IL;;WO	0	A61B5/0507;;A61B5/14532;;A61B5/1495;;A61B5/6824;;A61B5/6831;;A61B5/7246;;A61B5/742;;A61B2562/0228;;A61B5/14517;;A61B5/0533;;A61B5/01;;A61B5/024;;A61B5/0004;;A61B5/01;;A61B5/024;;A61B5/0507;;A61B5/0533;;A61B5/14517;;A61B5/14532;;A61B5/1495;;A61B5/6824;;A61B5/6831;;A61B5/7246;;A61B5/742;;A61B2562/0228;;A61B5/14532;;A61B5/0507;;A61B5/1495;;A61B5/7246;;A61B5/6824;;A61B5/6831;;A61B5/024;;A61B5/01;;A61…	A61B5/00;;A61B5/05;;A61B5/145;;A61B5/1495		3	1	135-443-887-302-737	10.1109/6668.924919	Osepchuk, et al. “Safety Standards for Exposure to RF Electromagnetic Fields.” Microwave. Jun. 2001. pp. 57-69. (Year: 2001).;;International Search Report for International Application No. PCT/US2018/051411 dated Nov. 26, 2018.;;Written Opinion for International Application No. PCT/US2018/051411 dated Nov. 26, 2018.	ACTIVE	X
75	EP	B1	EP 3656343 B1	172-737-355-455-615	44202	2021	EP 20150140 A	42678	EP 20150140 A;;EP 16197274 A	42678	WEARABLE APPARATUS ATTACHING ON TOOTH AND THE SENSING DEVICE FIXING AT TOOTH		LEE JIN KYUN	LEE JIN KYUN		https://lens.org/172-737-355-455-615	Granted Patent	yes	6	0	8	172-737-355-455-615;;051-396-376-941-866;;193-748-007-763-051;;126-352-633-837-045;;105-735-660-521-018;;121-826-819-921-392;;077-452-945-782-058;;065-225-785-794-977	EP	8	172-737-355-455-615;;051-396-376-941-866;;193-748-007-763-051;;126-352-633-837-045;;105-735-660-521-018;;121-826-819-921-392;;077-452-945-782-058;;065-225-785-794-977	EP	0	A61C7/08;;A61B5/02;;A61B5/02055;;A61B5/14532;;A61B5/14539;;A61B5/318;;A61B5/4557;;A61B5/682;;A61C7/14	A61C7/08;;A61B5/00;;A61B5/01;;A61B5/02;;A61B5/022;;A61B5/024;;A61B5/08;;A61B5/145		0	0				ACTIVE	X
76	US	B2	US 11534587 B2	111-493-443-010-674	44922	2022	US 201816177668 A	43405	TW 106140074 A	43059	Blood glucose monitoring and controlling system	A blood glucose monitoring and controlling system includes a detecting device and a liquid supplying device. The detecting device includes a first microneedle patch, a liquid pumping actuator, a sensor and a monitoring and controlling chip. The liquid supplying device includes a second microneedle patch, a liquid supplying actuator, a liquid supplying chamber and a liquid supplying and controllin…	MICROJET TECHNOLOGY CO LTD	MOU HAO-JAN;;HUANG CHI-FENG;;HAN YUNG-LUNG;;LEE WEI-MING;;CHEN HSUAN-KAI;;TSAI CHANG-YEN	MICROJET TECHNOLOGY CO. LTD (2019-01-04)	https://lens.org/111-493-443-010-674	Granted Patent	yes	26	1	8	049-437-821-538-976;;042-736-642-779-059;;033-552-043-385-119;;177-309-906-234-378;;108-057-977-122-778;;190-490-864-267-47X;;180-258-555-214-412;;111-493-443-010-674	EP;;TW;;JP;;US	8	049-437-821-538-976;;042-736-642-779-059;;033-552-043-385-119;;177-309-906-234-378;;108-057-977-122-778;;190-490-864-267-47X;;180-258-555-214-412;;111-493-443-010-674	EP;;TW;;JP;;US	0	G16H20/17;;A61M37/0015;;A61B5/0004;;A61B5/14532;;A61B5/150221;;A61B5/150984;;A61B5/157;;A61M2037/0023;;A61M2037/0046;;A61M2230/201	A61M37/00;;A61B5/00;;A61B5/145;;A61B5/15;;A61B5/157;;G16H20/17		6	3	116-682-852-630-094;;116-682-852-630-094;;010-310-506-450-591	10.1109/jmems.2014.2327096;;10.1109/jmems.2014.2327096;;10.1002/elan.201500635	Kim, Hanseup, “An Integrated Electrostatic Peristaltic 18-Stage Gas Micropump With Active Microvalves”, Journal of Microelectromechanical Systems, vol. 24, No. 1, Feb. 2015 (Year: 2015) (Year: 2015).;;Kim, Hanseup, “An Integrated Electrostatic Peristaltic 18-Stage Gas Micropump With Active Microvalves”, Journal of Microelectromechanical Systems, vol. 24, No. 1, Feb. 2015 (Year: 2015).;;Katz, Evge…	ACTIVE	X
77	US	B2	US 9737247 B2	139-973-360-391-597	42969	2017	US 201214342536 A	41152	US 201214342536 A;;US 201161530927 P;;US 2012/0053544 W	40788	Microneedle arrays for biosensing and drug delivery	Methods, structures, and systems are disclosed for biosensing and drug delivery techniques. In one aspect, a^ device for detecting an analyte and/or releasing a biochemical into a biological fluid can include an array of hollowed needles, in which each needle includes a protruded needle structure including an exterior wall forming a hollow interior and an opening at a terminal end of the protrude…	WANG JOSEPH;;WINDMILLER JOSHUA RAY;;NARAYAN ROGER;;MILLER PHILIP;;POLSKY RONEN;;EDWARDS THAYNE L;;UNIV CALIFORNIA;;UNIV NORTH CAROLINA STATE;;SANDIA LLC NAT TECH & ENG SOLUTIONS	WANG JOSEPH;;WINDMILLER JOSHUA RAY;;NARAYAN ROGER;;MILLER PHILIP;;POLSKY RONEN;;EDWARDS THAYNE L	NATIONAL TECHNOLOGY & ENGINEERING SOLUTIONS OF SANDIA LLC (2014-02-26);;THE REGENTS OF THE UNIVERSITY OF CALIFORNIA (2011-09-09);;NORTH CAROLINA STATE UNIVERSITY (2012-09-12)	https://lens.org/139-973-360-391-597	Granted Patent	yes	84	56	18	111-913-028-756-266;;134-968-627-053-16X;;059-892-431-561-350;;072-231-495-239-726;;101-078-399-546-947;;019-610-530-153-193;;110-418-931-756-057;;183-255-421-367-080;;058-984-025-251-48X;;183-295-326-310-963;;139-973-360-391-597;;150-958-453-516-494;;108-316-607-868-71X;;034-678-554-286-024;;020-530-163-784-879;;176-979-224-379-234;;169-917-503-639-281;;148-317-940-484-993	CN;;EP;;KR;;JP;;US;;AU;;WO	18	111-913-028-756-266;;134-968-627-053-16X;;059-892-431-561-350;;072-231-495-239-726;;101-078-399-546-947;;019-610-530-153-193;;110-418-931-756-057;;183-255-421-367-080;;058-984-025-251-48X;;183-295-326-310-963;;139-973-360-391-597;;150-958-453-516-494;;108-316-607-868-71X;;034-678-554-286-024;;020-530-163-784-879;;176-979-224-379-234;;169-917-503-639-281;;148-317-940-484-993	CN;;EP;;KR;;JP;;US;;AU;;WO	0	A61M5/158;;A61B5/14532;;A61B5/276;;A61B5/685;;A61B10/0045;;A61B2010/008;;A61B2562/028;;A61B2562/046;;A61M2037/0023;;A61M2037/003;;G01N33/48785;;A61B5/1473;;A61B5/14514;;A61B5/14532;;A61B5/14546;;A61B5/14865;;A61B5/150984;;A61B5/157;;A61B5/4845;;A61B5/6833;;A61B5/685;;A61B5/7282;;A61B10/0045;;A61B2010/008;;A61B2562/028;;A61B2562/046;;A61M5/158;;A61M5/1723;;A61M2005/1726;;A61M2037/0023;;A61M2037/00…	A61B5/1473;;A61B5/00;;A61B5/145;;A61B5/1486;;A61B5/15;;A61B5/157;;A61B10/00;;A61M5/158;;A61M5/172;;A61M37/00;;G01N33/487		10	5	042-238-079-252-802;;039-909-915-800-883;;008-035-587-413-585;;076-509-527-178-307;;014-288-043-638-05X	10.1021/nl104329y;;21280644;;10.1039/c1an00012h;;21412519;;pmc2771517;;10.1177/193229680900300211;;20144361;;10.1063/1.3569945;;21522504;;pmc3082351;;10.1002/elan.201100361	Extended European Search Report for European Patent Application No. 12842020.5, May 8, 2015, 7 pages.;;G. Jeon, S. Y. Yang, J. Byun, and J. K. Kim, “Electrically Actuatable Smart Nanoporous Membrane for Pulsatile Drug Release”, Nano Lett., 2011, 11, 1284-1288.;;Han, I. H., Authorized Officer, Korean Intellectual Property Office, International Search Report and Written Opinion, International Appli…	ACTIVE	X
78	US	B2	US 10624543 B2	105-499-384-865-33X	43942	2020	US 201615553861 A	42433	SG 10201501667P A;;SG 2016050103 W	42067	Photo-acoustic sensing apparatus and methods of operation thereof	A photo-acoustic sensing apparatus (100) for non-invasive measurement of blood parameters of a subject (102) comprises a photo-acoustic sensor (104) for sensing photo-acoustic signals (106) induced when a region of the subject is illuminated by a light source (108). A first sensor processing module (112) may derive blood oxygen saturation using sensed photo-acoustic signals (114). A second sensor…	UNIV NANYANG TECH	ZHENG YUANJIN;;FENG XIAOHUA;;GAO FEI	NANYANG TECHNOLOGICAL UNIVERSITY (2017-08-29)	https://lens.org/105-499-384-865-33X	Granted Patent	yes	20	2	5	088-381-943-778-550;;011-559-581-348-351;;105-499-384-865-33X;;100-990-434-770-274;;100-779-588-061-557	CN;;US;;WO	5	088-381-943-778-550;;011-559-581-348-351;;105-499-384-865-33X;;100-990-434-770-274;;100-779-588-061-557	CN;;US;;WO	0	A61B5/0095;;A61B5/01;;A61B5/14532;;A61B5/14542;;A61B5/7278;;A61B5/0095;;A61B5/01;;A61B5/14532;;A61B5/14542;;A61B5/1477;;A61B5/7278	A61B5/00;;A61B5/01;;A61B5/145;;A61B5/1477		23	20	002-861-395-559-017;;029-575-872-713-21X;;029-001-687-891-492;;066-192-874-577-884;;029-982-915-479-725;;069-478-330-046-228;;055-612-230-105-039;;013-000-205-460-222;;105-624-043-403-487;;002-833-217-456-017;;055-189-576-388-616;;053-536-826-667-134;;037-382-022-894-746;;124-024-665-358-596;;025-417-277-403-517;;026-188-593-710-068;;082-887-488-241-283;;039-884-676-652-933;;032-198-531-726-183;;…	10.1038/nphoton.2009.157;;20161535;;pmc2802217;;pmc3322413;;22442475;;10.1126/science.1216210;;12808463;;10.1038/nbt839;;10.1097/00000539-200003000-00012;;10702437;;10.1364/boe.2.000491;;21412455;;pmc3047355;;pmc3556647;;23377004;;10.1117/1.jbo.18.2.026003;;10.1117/1.2940362;;18601569;;pmc2713867;;19895126;;pmc2774978;;10.1117/1.3247155;;10.1117/12.809973;;10.1016/j.diabres.2010.12.025;;16822081;…	L. V. Wang, “Multiscale photoacoustic microscopy and computed tomography,” Nat Photonics, vol. 3, pp. 503-509, Aug. 29, 2009.;;L. V. Wang and S. Hu, “Photoacoustic tomography: in vivo imaging from organelles to organs,” Science, vol. 335, pp. 1458-1462, Mar. 23, 2012.;;X. Wang, Y. Pang, G. Ku, X. Xie, G. Stoica, and L. V. Wang, “Noninvasive laser-induced photoacoustic tomography for structural an…	ACTIVE	X
79	US	B2	US 11832938 B2	140-735-410-178-99X	45265	2023	US 202217747779 A	44699	US 202217747779 A;;US 202017112876 A;;US 202016899503 A;;US 202016779461 A;;US 201916368100 A;;US 201862649350 P	43187	Sensor cable support device including mechanical connectors	A sensor cable support device is described. The sensor cable support device can be used to implemented in wearable monitoring device to support a proximal portion of a sensor cable and electrically connect the proximal portion with a sensing circuitry. A distal portion of the sensor cable is insertable into a person's skin. The sensor cable support device may include a rigid body defining a pair …	DEXCOM INC	KO PEY-JIUN;;LIN ARTHUR;;STOWE TIMOTHY	DEXCOM INC (2019-04-09)	https://lens.org/140-735-410-178-99X	Granted Patent	yes	22	3	27	140-469-981-164-218;;126-181-816-083-254;;082-166-918-338-852;;143-322-625-172-126;;160-303-476-628-398;;012-640-242-812-791;;058-763-338-526-190;;039-012-637-147-434;;126-473-163-480-926;;118-173-759-828-853;;198-399-670-353-680;;002-095-291-917-529;;179-188-312-954-68X;;013-183-536-904-785;;164-485-447-636-933;;140-735-410-178-99X;;053-257-630-287-357;;190-801-252-780-147;;039-825-519-930-67X;;…	DK;;CN;;EP;;JP;;US;;AU;;CA;;WO	27	140-469-981-164-218;;126-181-816-083-254;;082-166-918-338-852;;143-322-625-172-126;;160-303-476-628-398;;012-640-242-812-791;;058-763-338-526-190;;039-012-637-147-434;;126-473-163-480-926;;118-173-759-828-853;;198-399-670-353-680;;002-095-291-917-529;;179-188-312-954-68X;;013-183-536-904-785;;164-485-447-636-933;;140-735-410-178-99X;;053-257-630-287-357;;190-801-252-780-147;;039-825-519-930-67X;;…	DK;;CN;;EP;;JP;;US;;AU;;CA;;WO	0	A61B5/14503;;A61B5/14532;;A61B5/6833;;A61B2560/0462;;A61B2562/225;;A61B5/1451;;A61B5/14532;;A61B5/1473;;A61B5/6801;;A61B5/6847;;A61B2562/12;;H05K1/181;;H05K7/1427;;H05K2201/10151;;H05K2201/10356;;A61B5/6833;;A61B2562/225;;A61B2560/0462;;A61B5/14503	A61B5/00;;A61B5/145;;A61B5/1473;;H05K1/18;;H05K7/14		2	0			International Preliminary Report on Patentability for Application No. PCT/US2019/024605, dated Oct. 8, 2020, 10 pages.;;International Search Report and Written Opinion for Application No. PCT/US2019/024605 dated Aug. 21, 2019, 13 pages.	ACTIVE	X
80	US	B2	US 11253207 B2	093-774-641-329-600	44614	2022	US 201716323120 A	42955	US 201716323120 A;;US 201662372661 P;;US 2017/0045944 W	42591	Systems and methods for medical monitoring	A medical device includes a temperature sensor configured to deliver a temperature signal and an optical sensor configured to deliver an optical signal. The medical device also includes a microcontroller configured to receive the temperature signal and the optical signal. The microcontroller is configured to calculate, in real-time, a body temperature, a pulse rate, a respiratory rate, and a bloo…	NEOPENDA PBC	SHAH SONA;;CAUVEL TERESA;;PEYSER REBECCA	NEOPENDA PBC (2019-05-02)	https://lens.org/093-774-641-329-600	Granted Patent	yes	21	2	6	141-673-093-935-808;;175-308-941-731-583;;067-528-418-189-282;;186-710-224-180-074;;093-774-641-329-600;;106-234-974-943-935	EP;;JP;;US;;WO	6	141-673-093-935-808;;175-308-941-731-583;;067-528-418-189-282;;186-710-224-180-074;;093-774-641-329-600;;106-234-974-943-935	EP;;JP;;US;;WO	0	A61B5/746;;A61B5/0022;;A61B5/02055;;A61B5/02416;;A61B5/02438;;A61B5/0816;;A61B5/14551;;A61B5/6804;;A61B5/6814;;A61B5/6831;;A61B5/725;;A61B5/7257;;A61B5/7278;;A61B5/74;;A61B5/747;;G16H40/67;;A61B5/746;;A61B5/0008;;A61B5/0022;;A61B5/01;;A61B5/02055;;A61B5/02416;;A61B5/02427;;A61B5/02438;;A61B5/0816;;A61B5/14551;;A61B5/6804;;A61B5/6814;;A61B5/6831;;A61B5/725;;A61B5/7257;;A61B5/7278;;A61B5/74;;A61B5/…	A61B5/00;;A61B5/01;;A61B5/0205;;A61B5/024;;A61B5/08;;A61B5/1455;;G08B21/04;;G08B21/18;;G16H40/67		1	0			International Search Report and Written Opinion dated Nov. 17, 2017, in corresponding International Application No. PCT/US2017/045944 (10 pages).	ACTIVE	X
82	US	B2	US 9402546 B2	155-594-322-414-25X	42584	2016	US 201414444685 A	41848	US 201414444685 A;;US 201213674033 A;;US 90915807 A;;IL 2006000379 W;;US 66495705 P	38436	Optical sensor device and image processing unit for measuring chemical concentrations, chemical saturations and biophysical parameters	Optical sensor devices, image processing devices, methods and computer readable code computer-readable storage media for detecting biophysical parameters, chemical concentrations, chemical saturations, vital signs and physiological information such as a malignant condition are provided. In some embodiments, the optical sensor includes an array of photodetectors, where each photodetector is config…	CNOGA HOLDING LTD;;CNOGA HOLDINGS LTD	SEGMAN YOSEF	CNOGA MEDICAL LTD (2017-01-23);;CNOGA HOLDINGS LTD (2016-07-11)	https://lens.org/155-594-322-414-25X	Granted Patent	yes	1	14	12	102-433-109-942-969;;120-046-373-516-208;;168-338-484-216-351;;105-989-355-543-392;;005-717-600-000-187;;085-875-335-038-285;;155-594-322-414-25X;;158-434-459-001-575;;041-280-821-945-180;;153-499-362-841-928;;138-099-927-901-558;;197-154-270-058-189	CN;;EP;;US;;WO	12	102-433-109-942-969;;120-046-373-516-208;;168-338-484-216-351;;105-989-355-543-392;;005-717-600-000-187;;085-875-335-038-285;;155-594-322-414-25X;;158-434-459-001-575;;041-280-821-945-180;;153-499-362-841-928;;138-099-927-901-558;;197-154-270-058-189	CN;;EP;;US;;WO	0	A61B5/0059;;A61B5/14532;;A61B5/1455;;A61B5/411;;A61B5/417;;A61B5/4244;;A61B5/443;;A61B5/444;;A61B5/445;;G06T7/0012;;G06T2207/30004;;A61B5/0059;;A61B5/14532;;A61B5/1455;;A61B5/411;;A61B5/417;;A61B5/4244;;A61B5/443;;A61B5/444;;A61B5/445;;G06T7/0012;;G06T2207/30004;;H10F39/12;;A61B5/0077;;A61B5/02;;A61B5/0205;;A61B5/02141;;A61B5/08;;A61B5/14546;;A61B5/14552	A61B5/1455;;A61B5/00;;A61B5/02;;A61B5/0205;;A61B5/021;;A61B5/08;;A61B5/145;;G06T7/00;;H01L27/146		0	0				ACTIVE	X
83	US	B2	US 10632009 B2	021-926-975-761-936	43949	2020	US 201816195624 A	43423	US 201816195624 A;;US 2017/0033563 W;;US 201662338920 P	42509	Positional obstructive sleep apnea detection system	An obstructive sleep apnea detection device including an optical engagement surface adapted to engage a user's skin; a light source adapted to emit light from the optical engagement surface; a photodetector adapted to detect light at the optical engagement surface and to generate a detected light signal; a position sensor adapted to determine patient sleeping position; a controller adapted to det…	HANCOCK MEDICAL INC	GOFF THOMAS G;;CHIANG KIRBY;;BOWDITCH NATHANIEL L	OURA HEALTH OY (2021-04-22);;HANCOCK MEDICAL INC (2018-10-26)	https://lens.org/021-926-975-761-936	Granted Patent	yes	302	7	11	199-253-264-296-793;;021-926-975-761-936;;083-115-556-478-861;;187-094-510-125-922;;134-101-018-328-699;;108-000-755-562-99X;;199-901-784-190-047;;059-122-293-009-945;;089-561-055-988-079;;171-992-851-466-075;;062-724-666-173-753	CN;;EP;;JP;;US;;WO	11	199-253-264-296-793;;021-926-975-761-936;;187-094-510-125-922;;062-724-666-173-753;;134-101-018-328-699;;083-115-556-478-861;;199-901-784-190-047;;059-122-293-009-945;;089-561-055-988-079;;171-992-851-466-075;;108-000-755-562-99X	CN;;EP;;JP;;US;;WO	0	A61F5/56;;A61B5/01;;A61B5/0205;;A61B5/0261;;A61B5/11;;A61B5/1135;;A61B5/14552;;A61B5/4818;;A61B5/6814;;A61B5/6816;;A61B5/6817;;A61B5/6819;;A61B5/6833;;A61B5/68335;;A61B5/6898;;A61B2560/0412;;A61B2562/0219;;A61B2562/146;;A61F5/56;;A61B5/0064;;A61B5/01;;A61B5/0205;;A61B5/02416;;A61B5/0261;;A61B5/0873;;A61B5/11;;A61B5/1135;;A61B5/1455;;A61B5/14552;;A61B5/4818;;A61B5/6814;;A61B5/6816;;A61B5/6817;;A61…	A61B5/1455;;A61B5/00;;A61B5/024;;A61B5/087;;A61B5/375;;A61F5/56;;A61M16/06;;A61M16/10		11	5	122-092-350-806-165;;060-097-623-876-915;;042-013-700-103-219;;043-009-238-662-946;;021-542-086-800-621	10.1093/sleep/7.2.110;;6740055;;10.1109/phealth.2009.5754827;;11035672;;10.1378/chest.118.4.1018;;11204057;;10.1093/sleep/24.1.90;;10.1093/sleep/15.2.162;;1579791	Cartwright; Effect of sleep position on sleep apnea severity; SLEEP; 7(2); pp. 110-114; Jun. 1984.;;Colrain et al.; The use of a nasal resistance valve to treat sleep disordered breathing (Abstract No. 0518); SLEEP 2008 22nd Ann. Mtg. Assoc. Prof. Sleep Soc., LLC; Baltimore, MD; vol. 31, Abstract Suppl.; p. A172; Jun. 7-12, 2008.;;Gunaratnam et al.; U.S. Appl. No. 60/494,119 entitled “Nasal Assem…	ACTIVE	X
85	US	B2	US 8968195 B2	157-292-506-730-731	42066	2015	US 201313911077 A	41431	US 201313911077 A;;US 201113337217 A;;US 42623209 A;;US 43390006 A;;US 201213676140 A;;US 201313858855 A;;US 43963106 A;;US 48681009 A;;US 201113337219 A	38849	Health monitoring appliance	A monitoring system includes a wearable eyeglass, band, belt, patch or bandage appliance; and a processor coupled to the wearable eyeglass, band, belt, patch or bandage appliance to analyze vital data or wellness data.	TRAN BAO	TRAN BAO	KONINKLIJKE PHILIPS N.V (2016-03-16);;WEST 74TH STREET SERIES 75 OF ALLIED SECURITY TRUST I (2015-12-15);;EMPIRE IP LLC (2014-10-31)	https://lens.org/157-292-506-730-731	Granted Patent	yes	107	187	2	157-292-506-730-731;;001-616-478-760-909	US	49	171-826-664-436-07X;;113-670-858-846-163;;089-788-192-384-876;;004-586-151-456-934;;001-616-478-760-909;;197-830-071-439-385;;131-703-983-368-130;;008-143-138-636-861;;111-976-577-519-683;;053-433-442-098-911;;003-089-380-641-902;;117-065-076-855-938;;016-232-469-468-713;;092-610-462-128-988;;157-292-506-730-731;;062-200-335-892-764;;111-215-572-292-030;;079-000-410-785-821;;105-377-247-857-24X;;…	US	0	A61B5/7465;;A61B5/0006;;A61B5/0022;;A61B5/0024;;A61B5/0077;;A61B5/02055;;A61B5/021;;A61B5/02438;;A61B5/0537;;A61B5/1112;;A61B5/1113;;A61B5/1117;;A61B5/1118;;A61B5/112;;A61B5/14532;;A61B5/14551;;A61B5/339;;A61B5/349;;A61B5/4806;;A61B5/4833;;A61B5/6808;;A61B5/681;;A61B5/6814;;A61B5/6815;;A61B5/6816;;A61B5/6887;;A61B5/6898;;A61B5/7214;;A61B5/7225;;A61B5/7257;;A61B5/726;;A61B5/7264;;A61B5/7267;;A61B5…	A61B5/02;;A61B5/00;;A61B5/0205;;A61B5/021;;A61B5/024;;A61B5/0402;;A61B5/044;;A61B5/0452;;A61B5/053;;A61B5/11;;A61B5/145;;A61B5/1455;;A61B7/04;;A61B8/00;;A61B8/06;;A61B19/00	600/300	1	0			U.S. Appl. No. 10/938,783, Wen.	ACTIVE	X
86	US	B2	US 11337615 B2	070-570-206-677-054	44705	2022	US 202117193833 A	44260	US 202117193833 A;;US 202062986199 P	43896	Smart wristband for multiparameter physiological monitoring	An ergonomically designed smart wristband for clinical-grade multiparameter monitoring is disclosed. The smart wristband incorporates multiple sensors including custom-designed reflective arterial pulse sensors, a thermopile sensor, and electrocardiogram (ECG) electrodes. When the smart wristband is worn on the wrist, the biosensors contact the skin. The smart wristband may tether wirelessly to a…	THE ACCESS TECH	AHMAD SAIF;;KUMAR GARG ATUL	THE ACCESS TECHNOLOGIES (2021-03-04)	https://lens.org/070-570-206-677-054	Granted Patent	yes	29	4	6	141-384-741-393-795;;059-822-035-123-283;;070-570-206-677-054;;135-581-884-248-363;;037-806-798-992-630;;035-752-489-716-145	EP;;US;;CA;;WO	8	116-178-460-817-658;;059-822-035-123-283;;070-570-206-677-054;;037-806-798-992-630;;141-384-741-393-795;;135-581-884-248-363;;064-433-772-871-144;;035-752-489-716-145	EP;;US;;CA;;WO	0	A61B5/0006;;A61B5/02055;;A61B5/28;;A61B5/346;;A61B5/681;;A61B5/6831;;A61B5/7207;;A61B5/7228;;A61B5/7285;;A61B5/742;;A61B5/746;;A61B2562/0219;;A61B2562/0271;;A61B5/01;;A61B5/0205;;A61B5/02438;;A61B5/02125;;A61B5/0022;;A61B5/1112;;G16H40/63;;G16H50/30;;A61B5/02055;;A61B5/681;;A61B5/28;;A61B5/0006;;A61B5/6831;;A61B5/742;;A61B2562/0219;;A61B5/746;;A61B5/7228;;A61B5/7285;;A61B5/7207;;A61B2562/0271;;A6…	A61B5/0205;;A61B5/00;;A61B5/28;;A61B5/346		3	3	043-509-182-552-545;;044-459-862-731-778;;078-210-837-906-716	10.1038/s41598-019-46936-9;;31337783;;pmc6650495;;10.1136/bmjinnov-2019-000354;;pmc6603632;;10.3390/s19112557;;31167514	P. Yousefian et al., “⋅ The Potential of Wearable Limb Ballistocardiogram in Blood Pressure Monitoring via Pulse Transit Time”, Scientific report, Article No. 10666, p. 1.11, 2019.;;S. Soon et al., “⋅ Wearable Devices for Remote Vital Signs Monitoring in the Outpatient Setting: An Overview of the Field”, BMJ Innovations, vol. 6, Issue 2, p. 55-71, 2019.;;R. Lazazzera et al., “A New Wearable Devic…	ACTIVE	X
88	US	B2	US 11103140 B2	003-488-427-887-167	44439	2021	US 202017027677 A	44095	US 202017027677 A;;US 202017005259 A;;US 202016854883 A;;US 201916689929 A;;US 201916689959 A;;US 201916453993 A;;US 202016831413 A;;US 201916551654 A;;US 201916375841 A;;US 201816156493 A;;US 201715635178 A;;US 201615231276 A;;US 201715832855 A;;US 201615182592 A;;US 201615284528 A;;US 201715722434 A;;US 201615182566 A;;US 201715833115 A;;US 201816147695 A;;US 201816156586 A;;US 201715832815 A;;…	42169	Monitoring blood sugar level with a comfortable head-mounted device	Described herein are embodiments of systems and methods for calculating glucose in a non-invasive manner using head-mounted sensors. In one embodiment, a system that calculates blood glucose levels includes a head-mounted contact photoplethysmography device that measures a signal indicative of a photoplethysmogram signal (PPG signal) at a first region comprising skin on a user's head, and a head-…	FACENSE LTD	FRANK ARI M;;TZVIELI ARIE;;TZVIELI ORI;;THIEBERGER GIL	FACENSE LTD (2020-09-22)	https://lens.org/003-488-427-887-167	Granted Patent	yes	84	1	2	003-488-427-887-167;;042-800-419-644-921	US	136	199-678-758-023-481;;064-567-562-861-478;;123-322-640-103-676;;136-644-062-522-791;;079-678-461-965-098;;166-388-476-023-309;;030-177-052-192-019;;086-310-978-072-370;;154-466-905-182-072;;163-214-927-643-859;;157-609-045-161-873;;005-694-058-842-544;;186-020-409-098-538;;194-384-386-992-226;;012-043-500-417-458;;127-952-200-297-35X;;118-458-046-933-484;;166-113-822-730-987;;109-347-497-744-369;;…	CN;;US;;DE;;WO;;GB	0	A61B2576/00;;A61B5/015;;A61B5/02438;;A61B5/1477;;A61B5/0077;;A61B5/7282;;A61B5/6814;;A61B2562/0276;;A61B5/165;;A61B2562/0271;;A61B5/6803;;A61B5/14532;;A61B5/02416;;A61B5/14552;;A61B5/02055;;G01J5/0265;;G01J2005/0077;;G01J5/0025;;G01J5/485;;G01J5/064;;A61B5/015;;A61B2576/00;;A61B5/6814;;G01J5/12;;A61B5/0075;;A61B5/6803;;A61B5/7282;;A61B5/748;;G01J5/0265;;A61B2562/0271;;G01J2005/0077;;A61B5/0077;;A…	A61B5/00;;A61B5/01;;A61B5/024;;A61B5/145;;A61B5/1477;;A61B5/16;;G01J5/00;;G01J5/02;;G01J5/12		88	75	027-301-908-825-387;;038-968-253-984-313;;029-912-861-844-542;;029-819-009-387-909;;011-621-648-793-439;;032-655-573-948-121;;106-313-834-531-74X;;147-902-698-141-079;;060-961-619-267-526;;007-943-173-750-730;;041-983-102-857-994;;083-784-040-615-034;;000-979-977-144-234;;013-038-103-078-368;;077-813-580-394-845;;068-806-236-046-516;;006-286-428-513-275;;095-909-073-762-163;;025-083-584-730-633;;…	28261531;;10.4258/hir.2017.23.1.53;;pmc5334132;;10.1109/access.2017.2678521;;10.1088/0967-3334/28/3/r01;;17322588;;10.1109/access.2017.2735419;;26473860;;pmc4634442;;10.3390/s151025681;;10.1088/0967-3334/31/1/r01;;19940350;;28268418;;10.1109/embc.2016.7590792;;10.1088/0967-3334/36/3/r1;;25694235;;10.5220/0005259003570364;;30906922;;10.15406/ijbsbe.2018.04.00125;;pmc6426305;;29658894;;pmc5964362;;…	Ahn, J. M. (2017). New aging index using signal features of both photoplethysmograms and acceleration plethysmograms. Healthcare informatics research, 23(1), 53-59.;;Alghoul, K., Alharthi, S., Al Osman, H., & El Saddik, A. (2017). Heart rate variability extraction from videos signals: ICA vs. EVM comparison. IEEE Access, 5, 4711-4719.;;Allen, J. (2007). Photoplethysmography and its application in…	ACTIVE	X
90	US	B2	US 10314500 B2	166-588-463-797-299	43627	2019	US 201515118183 A	42045	US 201515118183 A;;US 201461940020 P;;US 2015/0015137 W	41684	Transcutaneous photoplethysmography	The present invention discloses a reflectance type PPG-based physiological sensing system with a close proximity triangulation approach toward robustly measuring several physiological parameters including, but is not limited to, heart rate, breathing rate, blood oxygen saturation and pulse wave velocity.	LIFEQ GLOBAL LTD	OLIVIER LAURENCE RICHARD	LIFEQ GLOBAL LIMITED (2017-11-03)	https://lens.org/166-588-463-797-299	Granted Patent	yes	5	19	4	185-054-966-529-766;;012-546-703-662-845;;060-457-036-125-662;;166-588-463-797-299	TW;;US;;WO	4	185-054-966-529-766;;012-546-703-662-845;;060-457-036-125-662;;166-588-463-797-299	TW;;US;;WO	0	A61B5/02416;;A61B5/0002;;A61B5/0285;;A61B5/0816;;A61B5/02416;;A61B5/0002;;A61B5/02;;A61B5/02116;;A61B5/02125;;A61B5/02427;;A61B5/0285;;A61B5/0295;;A61B5/0816;;A61B5/14552;;A61B5/6813;;A61B5/7235	A61B5/00;;A61B5/02;;A61B5/021;;A61B5/024;;A61B5/0285;;A61B5/0295;;A61B5/08;;A61B5/1455		0	0				ACTIVE	X
91	US	B2	US 10025917 B2	029-984-689-658-432	43298	2018	US 201715632219 A	42909	US 201715632219 A;;US 201414268245 A	41761	Biometrics for user identification in mobile health systems	A wearable device may include a sensor system capable of obtaining physiological from a user's body. Some wearable devices may include a substance delivery system. A sensor system of a wearable device may include at least one “bio-assurance sensor” capable of obtaining biometric data that may be used to identify a user. For example, the bio-assurance sensor may be used to ensure that the wearable…	QUALCOMM INC	SEZAN MUHAMMED IBRAHIM;;SCHNEIDER JOHN KEITH;;KASKOUN KENNETH;;DANTSKER EUGENE	QUALCOMM INCORPORATED (2014-05-09)	https://lens.org/029-984-689-658-432	Granted Patent	yes	44	1	15	029-215-444-773-508;;002-771-159-661-256;;089-213-797-155-200;;123-475-149-235-406;;087-243-886-093-798;;055-354-221-280-557;;063-155-895-614-662;;029-984-689-658-432;;101-553-860-097-511;;111-142-588-609-595;;088-749-701-741-90X;;075-885-984-338-508;;148-466-707-601-099;;047-938-342-229-095;;163-908-589-723-296	CN;;EP;;KR;;JP;;US;;BR;;WO	15	029-215-444-773-508;;089-213-797-155-200;;002-771-159-661-256;;123-475-149-235-406;;087-243-886-093-798;;055-354-221-280-557;;063-155-895-614-662;;029-984-689-658-432;;101-553-860-097-511;;111-142-588-609-595;;088-749-701-741-90X;;075-885-984-338-508;;148-466-707-601-099;;047-938-342-229-095;;163-908-589-723-296	CN;;EP;;KR;;JP;;US;;BR;;WO	0	G06F21/32;;A61M5/14244;;A61M5/14248;;A61M5/14276;;A61M5/1723;;A61M2205/3553;;A61M2205/3561;;A61M2205/3584;;A61M2205/3592;;A61M2205/50;;A61M2205/609;;A61M2230/04;;A61M2230/06;;A61M2230/201;;A61M2230/205;;A61M2230/30;;A61M2230/42;;A61M2230/50;;G06F21/35;;G08C17/02;;H04L63/0853;;H04L63/0861;;G06F21/32;;A61M5/14244;;A61M5/14248;;A61M5/14276;;A61M5/1723;;A61M2205/3553;;A61M2205/3561;;A61M2205/3584;;A6…	G06F21/32;;A61B5/00;;A61B5/01;;A61B5/024;;A61B5/11;;A61B5/1171;;A61B5/1172;;A61B5/145;;G06F19/00;;G06F21/35;;G16H10/60		6	1	098-629-619-591-769	pmc3403647;;10.1155/2012/546021;;22910449	US 8,613,701, 12/2013, Rao et al. (withdrawn);;International Preliminary Report on Patentability PCT/US2015/027304—ISA/EPO—dated Jul. 19, 2016.;;International Search Report and Written Opinion—PCT/US2015/027304—ISA/EPO—dated Aug. 11, 2015.;;Second Written Opinion of the IPEA—PCT-US2015/027304—ISA/EPO—dated Apr. 26, 2016.;;Shin M., “Secure Remote Health Monitoring with Unreliable Mobile Devices,” …	ACTIVE	X
92	US	B2	US 11419548 B2	003-656-791-729-181	44796	2022	US 202016829953 A	43915	CN 201910401403 A	43599	Flexible photonic skin	A flexible photonic skin is provided, including a functional layer, an adhesive layer used for fixing the functional layer and made of hypoallergenic polyvinyl ethyl ether, and a packaging layer made of a polyurethane semi-transparent film and adhered to the adhesive layer, which are arranged successively from the top down, wherein the functional layer consists of two electrodes located on two si…	TIANGONG UNIV	LI HONGQIANG;;XIE RUI;;WEI XIAOQING;;WANG JIANING	TIANGONG UNIVERSITY (2020-03-23)	https://lens.org/003-656-791-729-181	Granted Patent	yes	2	0	4	003-656-791-729-181;;136-165-092-274-751;;180-685-353-926-397;;144-081-624-509-526	CN;;US	4	003-656-791-729-181;;136-165-092-274-751;;180-685-353-926-397;;144-081-624-509-526	CN;;US	0	A61B5/01;;A61B5/02055;;A61B5/14532;;A61B5/1455;;A61B5/282;;A61B5/318;;A61B5/02055;;A61B5/01;;A61B5/021;;A61B5/02438;;A61B5/14532;;A61B5/1455;;A61B5/259;;A61B5/282;;A61B5/318;;A61B5/6832;;A61B2562/228;;G02B6/12004;;G02B6/12009;;G02B6/1221;;G02B6/125;;A61B5/6832;;A61B5/02055;;A61B5/021;;A61B5/02438;;A61B5/14532;;A61B5/259;;A61B5/282;;A61B2562/228;;G02B6/12004;;G02B6/12009;;G02B6/124;;G02B2006/12097…	A61B5/0205;;A61B5/00;;A61B5/021;;A61B5/024;;A61B5/145;;A61B5/259;;A61B5/282;;G02B6/12;;G02B6/124		3	2	121-348-137-770-773;;067-501-253-120-788	10.1364/optica.4.000692;;20941073;;10.1364/oe.18.021732	Hongqiang Li et al. (2017). Chip-scale demonstration of hybrid III-V/silicon photonic integration for an FBG interrogator. Optica. 4. 692. 10.1364/OPTICA.4.000692 (Year: 2017).;;Thomas Ferrotti. Design, fabrication and characterization of a hybrid III-V on silicon transmitter for high-speed communications. Other. Université de Lyon, 2016. English. ffNNT : 2016LYSEC054fffftel-01529424f (Year: 2016…	ACTIVE	X
93	US	B2	US 9717446 B2	102-840-936-240-918	42948	2017	US 201113807540 A	40732	US 201113807540 A;;US 36291710 P;;AU 2011/000868 W	40368	Non-invasive measurement of blood oxygen saturation	A method for non-invasive determination of oxygen saturation of blood within a deep vascular structure of a human or animal patient comprising locating on skin of the patient in a vicinity of the deep vascular structure of interest emitter and receiver elements of a light oximeter device, wherein optimal location of said elements is achieved through matching of a plethysmography trace obtained fr…	DIXON BARRY;;STODDART PAUL RANDALL;;ST VINCENT'S HOSPITAL (MELBOURNE) LTD	DIXON BARRY;;STODDART PAUL RANDALL	ST. VINCENT'S HOSPITAL (MELBOURNE) LIMITED (2013-01-15);;SENSITIVE PTY LTD (2018-10-18)	https://lens.org/102-840-936-240-918	Granted Patent	yes	30	2	20	164-493-857-597-99X;;164-758-489-264-008;;019-544-698-147-990;;076-814-545-908-263;;056-264-004-460-786;;173-012-963-550-649;;133-682-854-298-204;;008-950-462-839-071;;062-226-313-107-310;;129-111-523-861-249;;174-111-363-368-077;;106-884-339-618-708;;149-096-605-627-221;;100-963-547-839-430;;164-083-139-740-198;;054-495-464-415-025;;181-478-848-013-623;;102-840-936-240-918;;189-633-322-984-992;;…	CN;;EP;;JP;;ES;;US;;AU;;CA;;WO;;BR;;NZ	20	164-493-857-597-99X;;164-758-489-264-008;;019-544-698-147-990;;076-814-545-908-263;;056-264-004-460-786;;173-012-963-550-649;;133-682-854-298-204;;008-950-462-839-071;;062-226-313-107-310;;129-111-523-861-249;;174-111-363-368-077;;106-884-339-618-708;;149-096-605-627-221;;100-963-547-839-430;;164-083-139-740-198;;054-495-464-415-025;;181-478-848-013-623;;102-840-936-240-918;;189-633-322-984-992;;…	CN;;EP;;JP;;ES;;US;;AU;;CA;;WO;;BR;;NZ	0	A61B5/14551;;A61B5/0261;;A61B5/14552;;A61B5/1459;;A61B5/6817;;A61B5/7246;;A61B5/14551;;A61B5/0261;;A61B5/14552;;A61B5/6817;;A61B5/7246;;A61B5/14551;;A61B5/0261;;A61B5/14552;;A61B5/1459;;A61B5/6817;;A61B5/7246	A61B5/1455;;A61B5/00;;A61B5/026;;A61B5/1459		11	6	028-857-107-809-061;;065-800-694-959-922;;067-508-790-495-042;;090-622-329-846-29X;;023-488-558-976-835;;075-087-033-636-933	10648336;;10.1097/00000539-200002000-00037;;16672787;;10.1097/01.ccx.0000224872.09077.dc;;10.1056/nejmoa010307;;11794169;;23015168;;10.1117/1.429919;;10.1002/lsm.1134;;11573221;;12118601;;10.1088/0031-9155/47/12/305	Bashkatov et al.; Optical properties of human cranial bone in the spectral range from 800 to 2000 nm; Saratov Fall Meeting 2005; Optical Technologies in Biophysics and Medicine VII; vol. 6163; 11 pgs.; Aug. 4, 2006.;;Keller et al.; A pilot study of pharyngeal pulse oximetry with the laryngeal mask airway: a comparison with finger oximetry and arterial saturation measurements in healthy anesthetiz…	ACTIVE	X
94	US	B2	US 10888273 B2	056-314-891-391-256	44208	2021	US 201615160594 A	42510	US 201615160594 A;;US 201562164154 P	42144	Personal hydration monitor	Disclosed are various embodiments for a flexible hydration sensor that can be implemented in a wearable device. A hydration monitoring device can include at least one flexible electrode comprising a plurality of silver nanowires embedded within a polydimethylsiloxane (PDMS) substrate. Processing circuitry can be configured to measure a hydration level of an individual wearing the hydration monito…	UNIV NORTH CAROLINA STATE	MYERS AMANDA;;MALHOTRA ABHISHEK;;MUTH JOHN;;ZHU YONG;;YAO SHANSHAN	NORTH CAROLINA STATE UNIVERSITY (2016-05-26)	https://lens.org/056-314-891-391-256	Granted Patent	yes	3	3	2	173-967-069-573-960;;056-314-891-391-256	US	2	173-967-069-573-960;;056-314-891-391-256	US	0	A61B5/4875;;A61B5/002;;A61B5/0531;;A61B5/681;;A61B5/6824;;A61B5/6828;;A61B5/6829;;A61B2503/10;;A61B2503/40;;A61B2560/0214;;A61B2562/0215;;A61B5/4875;;A61B5/002;;A61B5/0531;;A61B5/681;;A61B2560/0214	A61B5/00;;A61B5/053		0	0				ACTIVE	X
96	US	B1	US 10959651 B1	156-042-690-368-059	44285	2021	US 201514933985 A	42313	US 201514933985 A;;US 201562245151 P;;US 201562209037 P	42240	Human gas sensing glucose monitoring and ketone fluctuation detection device	Devices and methods of detecting gas and volatile organic compounds from skin are disclosed. One system for detecting emissions through skin includes a sensing device having a housing having a top portion and a bottom portion, the bottom portion having a concave-shaped bottom surface creating a cavity region, the at least one light source arranged to emit a spectral range of wavelengths of light …	BETTER LIFE TECH GROUP INC	MCKINNEY GEORGE ANTHONY;;BATTLE GLENN ALLAN;;WALKER ROBERT CHRISTOPHER	BETTER LIFE TECHNOLOGIES GROUP INC (2015-09-29)	https://lens.org/156-042-690-368-059	Granted Patent	yes	4	4	2	043-841-665-247-590;;156-042-690-368-059	US	2	043-841-665-247-590;;156-042-690-368-059	US	0	A61B5/14532;;A61B5/0075;;A61B5/01;;A61B5/0205;;A61B5/021;;A61B5/02438;;A61B5/14542;;A61B5/14546;;A61B5/14551;;A61B5/1455;;A61B5/0004;;A61B5/72;;A61B5/742	A61B5/1455;;A61B5/00		2	1	013-397-699-746-535	pmc4068184;;24963286;;10.1186/1471-2253-14-46	Leopold, J.H., et al., Glucose prediction by analysis of exhaled metabolites—a systematic review, BMC Anesthesiology 14:46 (2014).;;Palidwar, J., et al., Optical Filters Open Up New Uses for MWIR, LWIR Systems, Photonics Spectra, http://www.photonics.com/Article.aspx?AID=56392 (2014).	ACTIVE	X
97	US	B2	US 12070309 B2	014-103-508-592-570	45531	2024	US 202117319982 A	44329	TW 110102936 A	44223	Method, computer programming product and electronic device for calculating blood oxygen saturation	A method for calculating blood oxygen saturation includes defining the extreme value point of a non-red light signal as the extreme value point of a red light signal, and calculating the blood oxygen saturation according to the extreme value point of the red light signal. The method for calculating blood oxygen saturation of the present disclosure proposes to use other light source signals to ass…	WISTRON CORP	LIU ZHENG-DE;;SYU YOU-JYUN;;CHO CHING-AN;;CHOU HAO-GONG	WISTRON CORP (2021-03-18)	https://lens.org/014-103-508-592-570	Granted Patent	yes	13	0	7	081-629-364-434-923;;014-103-508-592-570;;162-453-993-029-904;;073-614-736-961-774;;139-357-312-880-83X;;112-190-755-117-081;;185-374-554-830-125	CN;;EP;;TW;;US	7	081-629-364-434-923;;073-614-736-961-774;;162-453-993-029-904;;014-103-508-592-570;;139-357-312-880-83X;;112-190-755-117-081;;185-374-554-830-125	CN;;EP;;TW;;US	0	A61B5/14552;;A61B5/14552;;A61B5/725;;A61B5/02416;;A61B5/7203;;A61B5/7221;;A61B5/14542;;A61B5/7225	A61B5/145;;A61B5/00		0	0				ACTIVE	X
98	US	B2	US 10165968 B2	012-641-483-632-200	43466	2019	US 201615148537 A	42496	US 201615148537 A;;KR 20150117340 A;;US 201562160351 P	42136	Blood glucose measurement apparatus and blood glucose measurement method thereof	Methods and apparatuses for blood glucose measurement are provided. A first glucose concentration in a body fluid of a user is detected based on a first measurement interval. A first blood glucose level of the user is determined based on the first glucose concentration. A glucose concentration measurement interval is changed from the first measurement interval to a second measurement interval acc…	SAMSUNG ELECTRONICS CO LTD;;SAMSUNG ELECTRONICS CO LTD	CHOI HYOUNG-SEON;;CHO CHUL-HO;;CHO SEONG-JE;;KIM KWANG-BOK;;LEE SEUNG-MIN;;JUNG SUN-TAE;;CHO JAE-GEOL	SAMSUNG ELECTRONICS CO. LTD (2016-04-25)	https://lens.org/012-641-483-632-200	Granted Patent	yes	14	4	5	016-661-799-865-290;;002-359-455-531-400;;111-427-529-535-054;;012-641-483-632-200;;059-722-362-931-490	US;;WO	5	016-661-799-865-290;;002-359-455-531-400;;111-427-529-535-054;;012-641-483-632-200;;059-722-362-931-490	US;;WO	0	A61B5/14532;;A61B5/02055;;A61B5/02438;;A61B5/11;;A61B5/14514;;A61B5/14517;;A61B5/14546;;A61B5/4809;;A61B5/681;;A61B5/6833;;A61B5/7275;;A61B5/7282;;A61B5/7435;;A61B5/7465;;A61B5/749;;A61B2503/10;;A61B2562/0219;;A61B2562/0223;;G16H50/30;;G16H80/00;;G16Z99/00;;A61B5/14532;;A61B5/02055;;A61B5/02438;;A61B5/11;;A61B5/14514;;A61B5/14517;;A61B5/14546;;A61B5/4809;;A61B5/681;;A61B5/6833;;A61B5/7275;;A61B5/…	A61B5/145;;A61B5/00;;A61B5/0205;;A61B5/024;;A61B5/11;;G16Z99/00		2	0			International Search Report dated Jun. 24, 2016 issued in counterpart application No. PCT/KR2016/003298, 12 pages.;;European Search Report dated Feb. 23, 2018 issued in counterpart application No. 16792846.4-1115, 11 pages.	ACTIVE	X
99	US	B2	US 12011178 B2	124-954-118-321-250	45461	2024	US 202318298659 A	45027	US 202318298659 A;;US 202016834807 A;;US 201916695114 A;;US 201962857454 P;;US 201962790473 P;;US 201862781516 P;;US 201862772097 P	43432	Apparatus for displacement of blood to mitigate peripheral nerve neuropathy	Embodiments of the present invention are directed to devices, systems and methods adapted for implementing intermittent displacement of blood to mitigate peripheral nerve neuropathy such as that induced by chemotherapeutic agents (i.e., chemotherapy-induced neuropathy (CIN)) that are administered to a patient. Such devices, systems and methods advantageously provide for precise, uniform and contr…	EVERETT STEVE EUGENE	EVERETT JAY DEAN;;EVERETT STEVE EUGENE	EVERETT MEDICAL TECHNOLOGIES LLC (2024-10-29);;EVERETT STEVE EUGENE (2021-02-02)	https://lens.org/124-954-118-321-250	Granted Patent	yes	35	1	17	114-128-254-193-874;;097-666-037-490-796;;185-061-640-453-840;;119-480-421-820-367;;001-066-698-262-713;;087-094-685-940-579;;100-792-322-318-905;;146-983-068-015-482;;014-102-575-654-968;;102-698-960-429-089;;132-891-232-802-570;;051-769-516-483-481;;157-439-376-406-354;;025-043-404-276-546;;121-341-326-877-009;;079-527-628-946-529;;124-954-118-321-250	US	17	114-128-254-193-874;;097-666-037-490-796;;185-061-640-453-840;;119-480-421-820-367;;001-066-698-262-713;;087-094-685-940-579;;146-983-068-015-482;;100-792-322-318-905;;014-102-575-654-968;;102-698-960-429-089;;132-891-232-802-570;;051-769-516-483-481;;025-043-404-276-546;;157-439-376-406-354;;121-341-326-877-009;;079-527-628-946-529;;124-954-118-321-250	US	0	A61H9/0007;;A61H9/0092;;A61H2033/143;;A61B17/1355;;A61H2205/106;;A61H9/0071;;A61B17/1355;;A61H2033/143;;A61H9/0092;;A61H9/0007;;A61B5/00	A61B17/135;;A61H9/00;;A61H33/14		0	0				ACTIVE	X
100	US	B2	US 11864923 B2	181-972-950-941-999	45300	2024	US 202218087519 A	44917	US 202218087519 A;;US 202217883068 A;;US 202163230815 P	44417	Method for reducing melanin bias in pulse oximeters	The melanin bias reducing pulse oximeter system reduces melanin interference when obtaining pulse oximetry readings for individuals with higher skin concentrations of melanin. The system incorporates optics reducing the melanin bias through hardware and software designed using extensive testing, via a proprietary testing method. The physical pulse oximeter includes different mechanical designs, f…	JMAD CREATIONS LLC	MADERIC JONATHAN M;;ELDUFF SAMANTHA ROSE;;JOYCE JACOB MARTIN	JMAD CREATIONS LLC (2021-08-06)	https://lens.org/181-972-950-941-999	Granted Patent	yes	19	0	14	076-668-670-402-066;;089-265-225-429-215;;027-705-131-393-132;;127-363-697-580-373;;181-972-950-941-999;;136-606-944-240-270;;169-623-224-808-042;;026-188-442-582-45X;;071-779-236-344-297;;070-845-724-482-273;;015-611-981-333-109;;075-112-556-221-405;;158-432-326-944-984;;199-911-616-088-851	CN;;KR;;EP;;JP;;US;;AU;;CA;;WO;;IL;;MX	16	076-668-670-402-066;;089-265-225-429-215;;027-705-131-393-132;;127-363-697-580-373;;181-972-950-941-999;;104-949-267-740-502;;136-606-944-240-270;;169-623-224-808-042;;026-188-442-582-45X;;071-779-236-344-297;;070-845-724-482-273;;015-611-981-333-109;;145-568-631-310-989;;075-112-556-221-405;;158-432-326-944-984;;199-911-616-088-851	CN;;KR;;EP;;JP;;US;;AU;;CA;;WO;;IL;;MX	0	A61B5/14552;;A61B5/6826;;A61B5/02416;;A61B5/7221;;A61B5/14551;;A61B5/0022;;A61B5/02433;;A61B5/681;;A61B5/6824;;A61B5/742;;A61B5/7203;;A61B2562/0219;;A61B5/002;;A61B5/0205;;A61B5/02433;;A61B5/14552;;A61B5/681;;A61B5/7203;;A61B5/7225;;A61B5/742;;A61B5/14552;;A61B5/6826;;A61B5/6824;;A61B5/6831;;A61B5/0002;;A61B5/11;;A61B5/742;;A61B2562/0219;;A61B5/7203;;A61B5/0205;;A61B5/14552;;A61B5/02433;;A61B5/72…	A61B5/0205;;A61B5/00;;A61B5/024;;A61B5/1455		5	1	027-388-126-225-963	10.3390/s18103457;;30326552;;pmc6211094	International Search Report and Written Opinion of PCT International Application No. PCT/US2022/039703, dated Dec. 6, 2022.;;Ohad Yossef Hay et al., “Pulse Oximetry with Two Infrared Wavelengths without Calibration in Extracted Arterial Blood”, MDPI Journal, Sensors 2018, 18, 3457, pp. 1-13.;;NONIN Technical Bulletin, “The Effects of Dark Skin Pigmentation and Low Saturation in Oximetry” “NONIN P…	ACTIVE	X
101	US	B2	US 11096608 B2	028-864-325-266-822	44432	2021	US 201415100067 A	41976	EP 13195469 A;;EP 2014076457 W	41611	Device and method for non-invasive measuring of analytes	The present disclosure relates to devices and methods for non-invasive measuring of analytes. At least one embodiment relates to a wearable system for non-invasive measuring of a concentration of an analyte in skin tissue. The wearable system includes an integrated circuit that includes a first optical unit. The first optical unit includes a Raman spectrometer. The first optical unit also include…	IMEC VZW	VAN DORPE POL;;PEUMANS PETER	IMEC VZW (2016-06-15)	https://lens.org/028-864-325-266-822	Granted Patent	yes	16	4	7	076-638-217-588-205;;001-433-880-590-408;;028-864-325-266-822;;097-000-220-214-844;;149-603-310-585-419;;074-658-093-104-488;;004-637-824-688-746	EP;;JP;;US;;WO	7	076-638-217-588-205;;001-433-880-590-408;;028-864-325-266-822;;097-000-220-214-844;;149-603-310-585-419;;074-658-093-104-488;;004-637-824-688-746	EP;;JP;;US;;WO	0	A61B5/0066;;A61B5/14532;;A61B5/443;;G01J3/0256;;G01J3/44;;G01N21/65;;A61B2562/0233;;G01N2201/0633;;G01N2201/0636;;G01J3/0291;;A61B5/1455;;A61B5/0066;;A61B5/14532;;G01N21/65;;A61B2562/0233;;G01J3/0256;;A61B5/443;;G01J3/44;;G01N2201/0636;;G01N2201/0633;;G01J3/0291;;A61B5/1455;;A61B5/0075;;A61B5/1451;;A61B5/681;;G01B9/02091;;G01N21/35;;G01N2201/12	A61B5/00;;A61B5/145;;A61B5/1455;;G01B9/02;;G01J3/02;;G01J3/44;;G01N21/35;;G01N21/65		4	2	050-509-346-574-411;;153-079-280-374-114	10.1364/boe.1.000310;;10.1364/boe.1.000310/;;pmc3005160;;21258468;;10.1002/jbio.200910022;;19569116;;pmc2785873	PCT International Search Report and Written Opinion, PCT International Application No. PCT/EP2014/076457, dated Feb. 18, 2015.;;Larin, Kirill V. et al., “Monitoring Refractive Index Variations in Turbid Media Using Phase-Sensitive Frequency-Domain OCT”, Proceedings of SPIE, vol. 5690, Apr. 13, 2005, pp. 422-425.;;Robles, Francisco et al., “Assessing Hemoglobin Concentration Using Spectroscopic Op…	ACTIVE	X
102	US	B2	US 10339781 B2	136-208-517-828-885	43648	2019	US 201816035971 A	43297	US 201816035971 A;;US 201715510031 A;;US 2015/0048881 W;;US 201462047893 P;;US 201562155124 P	41891	Methods and apparatus for monitoring alterness of an individual utilizing a wearable device and providing notification	Methods and apparatus for monitoring fatigue and notifying an individual are described. The individual may be an operator of a vehicle, equipment, or machine, a student, or other person that may experience fatigue. Motion of the individual is monitored to detect a predescribed motion in response to a stimulus to first determine a base responsiveness profile. Afterwards, a current responsiveness p…	TORVEC INC;;CURAEGIS TECH INC	KAPLAN RICHARD A;;HEMINK DOUGLAS A;;KENYON MATT	CURGROUP INC (2022-10-18);;TORVEC INC (2015-09-01)	https://lens.org/136-208-517-828-885	Granted Patent	yes	182	4	15	015-786-760-701-099;;036-798-012-198-600;;163-076-337-663-822;;136-208-517-828-885;;187-366-297-233-639;;144-491-517-774-377;;196-679-320-283-233;;147-325-918-544-244;;036-098-320-890-108;;197-745-190-631-621;;114-057-067-908-648;;145-132-096-306-752;;090-076-114-489-090;;073-335-238-925-98X;;055-429-169-039-224	CN;;KR;;EP;;JP;;US;;CA;;BR;;WO;;MX	15	015-786-760-701-099;;163-076-337-663-822;;036-798-012-198-600;;136-208-517-828-885;;187-366-297-233-639;;144-491-517-774-377;;196-679-320-283-233;;147-325-918-544-244;;036-098-320-890-108;;073-335-238-925-98X;;145-132-096-306-752;;114-057-067-908-648;;090-076-114-489-090;;197-745-190-631-621;;055-429-169-039-224	CN;;KR;;EP;;JP;;US;;CA;;BR;;WO;;MX	0	A61B5/1104;;A61B5/18;;A61B5/6801;;A61B5/74;;B60K28/066;;B60W40/08;;G08B21/06;;G08B25/016;;G08B21/0453;;G08B21/0446;;G08B21/043;;A61B5/02055;;A61B5/1112;;A61B5/162;;A61B5/6831;;A61B5/7275;;A61B2560/0242;;G16Z99/00;;A61B5/6831;;A61B5/74;;A61B5/02055;;A61B5/1104;;A61B5/1112;;A61B5/162;;A61B5/18;;A61B5/6801;;A61B5/7275;;A61B2560/0242;;G08B21/043;;G08B21/0446;;G08B25/016;;G08B21/06;;G08B21/0453;;G16H5…	G08B21/06;;A61B5/00;;A61B5/0205;;A61B5/024;;A61B5/11;;A61B5/16;;A61B5/18;;A61B5/352;;B60K28/06;;B60W40/08;;G08B21/04;;G08B25/01;;G16Z99/00		16	2	027-183-612-864-948;;137-486-695-132-529	10.1007/978-3-642-25167-2_5;;18427159;;10.1088/0967-3334/29/5/002	International Search Report dated Nov. 24, 2015 for International Application No. PCT/US2015/048881.;;International Preliminary Report and Written Opinion dated Mar. 23, 2017 for International Application No. PCT/US2015/048881.;;2014 Bluetooth Watch New Wearable Electronic Device L12 Wristband NFC Handsfree Car Kit Wireless Smart Watch for iPhone, Nov. 13, 2014, pp. 1-6, retrieved from http://sma…	ACTIVE	X
103	US	B2	US 11766183 B2	073-430-363-936-800	45195	2023	US 202016994084 A	44057	MY PI2020002350 A	43964	System and method for analyzing a physiological condition of a user	A system (100) and a method for analyzing a physiological condition of a user. The system (100) comprises one or more sensors (102a, 102b) to measure one or more parameters including temperature and relative humidity from the user's skin and/or a corresponding temperature and relative humidity from the user's environment via an air gap. A signal representative of the measured parameters is genera…	TAN GEOFFRY WENG LENG;;YEOH ENG KONG	TAN GEOFFRY WENG LENG;;YEOH ENG KONG		https://lens.org/073-430-363-936-800	Granted Patent	yes	22	0	7	162-527-468-680-415;;045-242-703-780-125;;073-430-363-936-800;;134-947-886-872-503;;144-425-260-926-13X;;131-025-128-936-379;;196-143-219-794-893	CN;;US;;AU;;SG;;WO	7	162-527-468-680-415;;045-242-703-780-125;;073-430-363-936-800;;134-947-886-872-503;;144-425-260-926-13X;;131-025-128-936-379;;196-143-219-794-893	CN;;US;;AU;;SG;;WO	0	G01D21/02;;G06F18/24;;G06N20/00;;G06N20/10;;A61B5/01;;A61B5/0022;;A61B5/4266;;A61B5/486;;A61B5/681;;A61B5/6896;;A61B5/6897;;A61B5/6898;;A61B5/7264;;A61B5/746;;A61B5/747;;A61B2560/0242;;A61B5/02055;;A61B5/0022;;A61B5/0024;;A61B5/6831;;A61B5/7267;;A61B5/7275;;A61B5/746;;A61B5/7465;;A61B2562/0271;;A61B2562/029	A61B5/0205;;A61B5/00		7	1	020-313-964-147-799	10.1152/ajpregu.00178.2018;;30134737	Vargas, “Skin wettedness is an important contributor to thermal behavior during exercise and recovery” [URL: https://doi.org/10.1152/ajpregu.00178.2018, accessed Nov. 14, 2022, published Oct. 20, 2018]. (Year: 2018).;;Lee, “Regional Variation of Human Skin Surface Temperature” [URL: https://www.ncbi.nlm.nih.gov/pmc/articles/PMC7992731/, accessed Nov. 14, 2022, published Jun. 2019], (Year: 2019).;…	ACTIVE	X
104	US	B2	US 11998305 B2	154-154-233-461-323	45447	2024	US 202117178886 A	44245	US 202117178886 A;;US 202063022711 P	43962	Systems and methods for using a wearable health monitor	A system and method for using algorithms and acoustic input to control, monitor, annotate, and configure a wearable patch that monitors physiological signals. The method comprises the receiving a transmission at a wearable device wherein the transmission can identify a mode of operation, an annotation to the data in the device, a request for data from the device, a modification of the configurati…	BRAVEHEART WIRELESS INC	MACEACHERN STUART P;;JENKEL MARTIN W	BRAVEHEART WIRELESS INC (2021-02-17)	https://lens.org/154-154-233-461-323	Granted Patent	yes	6	0	3	154-154-233-461-323;;158-152-778-631-579;;128-266-112-287-123	EP;;US	3	154-154-233-461-323;;158-152-778-631-579;;128-266-112-287-123	EP;;US	0	A61B5/4803;;A61B5/16;;A61B5/0205;;A61B5/7264;;A61B5/6833;;A61B2562/0204;;A61B5/749;;A61B5/002;;A61B5/0022;;A61B5/0024;;A61B5/02055;;A61B5/6802;;A61B5/7264;;A61B5/741;;A61B5/746;;A61B2562/0204;;G16H80/00	A61B5/0205;;A61B5/00;;G16H80/00		1	0			Extended European Search Report for Application No. 21171276.5-1113 dated Oct. 7, 2021, 11 pages.	ACTIVE	X
105	US	B2	US 11883135 B2	093-188-734-156-786	45321	2024	US 202117512672 A	44497	US 202117512672 A	44497	Wearable three-dimensional auricular multi-point bio-signal acquisition, health status monitoring, and bio-stimulation device	The present invention provides a personalized, three-dimensional printed, human auricle-specific multiple auricular points' bio-signal acquisition, health status monitoring, and bio-stimulation device, including an artificial ear model made of at least one bio-compatible, flexible polymer, a plurality of sensing and stimulating electrodes with at least one sensing end and a signal acquisition/pro…	UNIV CITY HONG KONG	CHAN HO-YIN;;HUANG QING YUN;;LI WEN JUNG	CITY UNIVERSITY OF HONG KONG (2021-10-07)	https://lens.org/093-188-734-156-786	Granted Patent	yes	9	0	2	071-799-537-548-435;;093-188-734-156-786	US	2	071-799-537-548-435;;093-188-734-156-786	US	0	A61N1/36036;;A61B5/02055;;A61B5/02438;;A61B5/0531;;A61B5/0537;;A61B5/14551;;A61B5/251;;A61B5/28;;A61B5/291;;A61B5/4848;;A61B5/4854;;A61B5/4875;;A61B5/6803;;A61B5/6815;;A61B5/7282;;A61B2562/12;;A61B2562/164;;A61B2562/166;;A61N1/3603;;B33Y80/00;;A61B5/02055;;A61B5/0002;;A61B5/0531;;A61B5/25;;A61B5/318;;A61B5/369;;A61B5/6815;;A61N1/36036;;B33Y10/00;;B33Y50/00;;B33Y80/00	A61B5/0205;;A61B5/00;;A61B5/0531;;A61B5/25;;A61B5/318;;A61B5/369;;A61N1/36;;B33Y10/00;;B33Y50/00;;B33Y80/00		0	0				ACTIVE	X
106	US	B2	US 11998304 B2	174-847-241-280-992	45447	2024	US 202017123248 A	44181	US 202017123248 A;;US 201916439467 A	43628	Ring for optically measuring biometric data	Disclosed herein is a ring-shaped wearable device for detecting biometrics with a light source and a photodetector directed towards a digit wearing the ring-shaped device. The ring can thus detect oxygen saturation of a wearer based on light transmitted through the wearer's finger. The ring can include power saving measures to extend the battery life. A motion sensor can help determine opportune …	FITBIT INC	WASSON JACLYN LEVERETT;;RICHARDS PETER W;;SUNDEN LINDSEY MICHELLE;;O'CONNOR COREY STEPHEN;;HENEGHAN CONOR JOSEPH;;ZHANG XI;;VAVADI HAMED;;SARANTOS CHRIS HANRAHAN;;DESS PETER COLIN	FITBIT INC (2019-06-13)	https://lens.org/174-847-241-280-992	Granted Patent	yes	39	0	3	174-847-241-280-992;;126-053-092-852-786;;156-704-773-813-736	US	3	174-847-241-280-992;;126-053-092-852-786;;156-704-773-813-736	US	0	G01N33/4925;;G01N2201/0221;;G01N2021/3155;;G01N2021/3181;;G01N21/3151;;G01N2201/066;;A61B2562/0219;;A61B5/6826;;A61B5/14552;;A61B5/02438;;A61B5/14535;;A61B5/021;;A61B5/0205;;A61B5/14532;;A61B5/14546;;A61B5/0022;;A61B5/0205;;A61B5/0002;;A61B5/14552;;A61B5/6826;;A61B5/14532;;A61B5/02438;;A61B5/14546;;G01N33/4925;;G01N21/3577;;A61B2562/0219;;A61B5/021;;A61B5/14535	A61B5/1455;;A61B5/00;;A61B5/0205;;A61B5/021;;A61B5/024;;A61B5/145;;G01N21/3577;;G01N33/49		6	0			U.S. Appl. No. 62/006,835, filed Jun. 2, 2014 for “Wearable Computing Device” in the name of Motiv, Inc.;;U.S. Appl. No. 61/910,201, filed Nov. 29, 2013 for “Finger Ring Device for Activity Monitoring or Gestural Input” in the name of Motiv, Inc.;;Non-Final Office Action issued in U.S. Appl. No. 16/439,467, dated Jul. 22, 2019.;;Final Office Action issued in U.S. Appl. No. 16/439,467, dated Nov. …	ACTIVE	X
107	US	B2	US 11998326 B2	187-573-451-379-671	45447	2024	US 202217585841 A	44588	US 202217585841 A;;CN 201610945334 A;;US 201916346743 A;;CN 2017070888 W	42676	Smart wearable device	A smart wearable device includes a detection apparatus and a case, the detection apparatus specifically includes one set of measuring parts and a plurality of sets of light emitting parts; the one set of measuring parts and the plurality of sets of light emitting parts are inlaid into the case and arranged into a polygon, where each of the plurality of sets of light emitting parts and the one set…	HUAWEI TECH CO LTD	NI XIAODONG;;XI YI;;SHEN AO;;WEI WENXIONG	HUAWEI TECHNOLOGIES CO. LTD (2019-09-18)	https://lens.org/187-573-451-379-671	Granted Patent	yes	44	0	23	197-045-415-768-059;;130-191-961-388-058;;130-861-917-597-282;;052-601-381-366-591;;090-903-319-323-744;;029-946-186-836-658;;162-271-118-296-484;;117-256-983-707-615;;064-323-155-038-942;;004-646-334-960-000;;168-180-760-895-956;;177-347-185-590-432;;160-157-032-153-747;;025-377-703-319-251;;129-409-907-281-878;;160-111-194-480-667;;069-259-807-535-951;;014-047-791-514-653;;194-527-303-187-279;;…	CN;;KR;;EP;;JP;;ES;;US;;BR;;WO	23	197-045-415-768-059;;130-191-961-388-058;;130-861-917-597-282;;052-601-381-366-591;;090-903-319-323-744;;029-946-186-836-658;;162-271-118-296-484;;117-256-983-707-615;;064-323-155-038-942;;004-646-334-960-000;;168-180-760-895-956;;177-347-185-590-432;;160-157-032-153-747;;025-377-703-319-251;;129-409-907-281-878;;160-111-194-480-667;;069-259-807-535-951;;014-047-791-514-653;;194-527-303-187-279;;…	CN;;KR;;EP;;JP;;ES;;US;;BR;;WO	0	A61B5/0205;;A61B5/14551;;A61B5/683;;A61B5/14542;;A61B5/02416;;A61B5/02433;;A61B5/02438;;A61B5/0004;;H02J50/10;;A61B5/02;;A61B5/0205;;A61B5/0255;;A61B5/14552;;A61B5/681;;A61B5/25;;H02J50/00;;A61B5/02427;;A61B5/02438;;A61B5/14552;;A61B5/681;;A61B5/332;;A61B2560/0209;;A61B5/0205;;A61B5/02416;;A61B5/02438;;A61B5/14552;;A61B5/681;;A61B2560/0209;;A61B2560/0214;;G06F1/163;;A61B5/25;;H02J50/10	A61B5/0205;;A61B5/00;;A61B5/024;;A61B5/1455;;A61B5/25;;G06F1/16;;H02J50/10		15	0			Anonymous [online], “Apple patent: Let Apple Watch monitor heart rate more accurately,” retrieved from internet on Oct. 7, 2019, retrieved from URL <http://www.keke289.com/news/145482.html>, 4 pages (partial English translation).;;Extended European Search Report issued in European Application No. 17867213.5 dated Aug. 5, 2019, 7 pages.;;Office Action issued in Chinese Application No. 201780003527…	ACTIVE	X
108	US	B2	US 11925784 B2	080-343-474-452-065	45363	2024	US 202016932471 A	44029	CN 201810054424 A;;CN 2018121415 W	43119	Insulin injection device	This invention provides an insulin injection device, comprising: a wearable module, a detection module and a drug administration module, wherein the wearable module is used for fixing the detection module and the drug administration module to a body of a user; the detection module is used for detecting a blood glucose concentration of the user, determining a dose of required insulin according to …	INNOMD MEDICAL TECH SERVICES CO LTD	JIANG FENG;;JIANG HAOTIAN	INNOMD MEDICAL TECHNOLOGY SERVICES CO. LTD (2020-07-15)	https://lens.org/080-343-474-452-065	Granted Patent	yes	11	0	4	086-045-008-607-683;;049-229-158-420-448;;109-659-022-837-425;;080-343-474-452-065	CN;;US;;WO	4	109-659-022-837-425;;049-229-158-420-448;;080-343-474-452-065;;086-045-008-607-683	CN;;US;;WO	0	A61M5/3007;;A61M5/31;;A61M5/31511;;A61B5/14532;;A61B5/1455;;A61M2005/3022;;A61M5/30;;A61M5/3007;;A61M5/31511;;A61M2005/3022;;A61M2205/50;;A61M2230/20;;A61M2005/1726;;A61M2005/14208;;A61M5/31;;A61B5/0075;;A61B5/0084;;A61B5/14532;;A61B5/1455;;A61M5/42;;A61B5/0075;;A61B5/0084;;A61B5/14532;;A61M5/14244;;A61M5/1723;;A61M5/3155;;A61M5/31581;;A61M2005/14208;;A61M2005/1726	A61M5/142;;A61B5/00;;A61B5/145;;A61M5/172;;A61M5/315		1	0			International Search Report issued for International Patent Application No. PCT/CN2018/121415, dated Mar. 15, 2019, 7 pages including English translation.	ACTIVE	X
109	US	B1	US 11051706 B1	155-645-149-346-018	44383	2021	US 201815948970 A	43199	US 201815948970 A;;US 201762482997 P	42832	Multiple source-detector pair photoplethysmography (PPG) sensor	Systems, devices, and methods for tracking one or more physiological metrics (e.g., heart rate, blood oxygen saturation, and the like) of a user are described. For example, one or more light sources and one or more light detectors may be positioned on a wearable device such that light can be emitted towards the user's skin and further such that light reflected back to the wearable device can be m…	FITBIT INC	NADEAU KYLE P;;SARANTOS CHRIS H;;WEEKLY KEVIN PU;;PRIETO JAVIER L;;RICHARDS PETER W;;STETSON PAUL FRANCIS;;DESHPANDE ANIKET SANJAY	FITBIT INC (2018-04-10)	https://lens.org/155-645-149-346-018	Granted Patent	yes	287	17	3	103-338-057-824-24X;;044-601-040-395-861;;155-645-149-346-018	US	4	103-338-057-824-24X;;108-984-690-215-229;;044-601-040-395-861;;155-645-149-346-018	US	0	A61B5/0059;;A61B5/02433;;A61B5/02438;;A61B5/1118;;A61B5/1455;;A61B5/6824;;A61B5/721;;A61B2560/0252;;A61B2562/0219;;A61B2562/046;;A61B5/02433;;A61B5/0059;;A61B5/02438;;A61B5/11;;A61B5/1455;;A61B5/6824	A61B5/1455;;A61B5/00;;A61B5/02;;A61B5/024;;A61B5/11		189	6	051-701-958-704-981;;042-113-400-583-394;;066-496-407-030-962;;024-116-610-637-566;;048-811-002-527-975;;001-328-165-302-337	23397303;;10.1183/09031936.00134312;;10.1139/h07-001;;17510675;;18209228;;10.1123/jpah.4.4.359;;10.1609/aimag.v33i2.2408;;10.1155/2012/643653;;10.1007/s00421-004-1041-5;;14985994	U.S. Office Action, dated Aug. 4, 2014, issued in U.S. Appl. No. 13/924,784.;;U.S. Notice of Allowance, dated Nov. 19, 2014, issued in U.S. Appl. No. 13/924,784.;;U.S. Office Action, dated Oct. 22, 2014, issued in U.S. Appl. No. 14/290,884.;;U.S. Notice of Allowance, dated Feb. 6, 2015, issued in U.S. Appl. No. 14/290,884.;;U.S. Office Action, dated Jun. 22, 2015, issued in U.S. Appl. No. 14/693,…	ACTIVE	X
110	US	B2	US 12137756 B2	118-874-301-532-008	45608	2024	US 202117307233 A	44320	TW 109115433 A	43959	Smart cloth	A smart cloth includes a cloth body, a control body, actuation air-permeable components, temperature sensing components, and a health-monitoring device. The health-monitoring device includes a bio-sensing module, a blood glucose sensor, a blood pressure measurement module, and a gas bag. The temperature information of the wearer is detected by the temperature sensing components and outputted to t…	MICROJET TECHNOLOGY CO LTD	MOU HAO-JAN;;LIN CHING-SUNG;;CHEN CHIH-KAI;;HUANG CHI-FENG;;HAN YUNG-LUNG;;HSIEH CHIN-WEN	MICROJET TECHNOLOGY CO. LTD (2022-10-05)	https://lens.org/118-874-301-532-008	Granted Patent	yes	20	0	4	197-815-847-788-713;;118-874-301-532-008;;173-205-440-250-277;;146-565-473-590-462	TW;;US	4	173-205-440-250-277;;118-874-301-532-008;;146-565-473-590-462;;197-815-847-788-713	TW;;US	0	A61B5/02055;;A61B5/02233;;A61B5/14532;;A61B5/332;;A61B5/4836;;A61F7/00;;A61F2007/006;;A61F2007/0093;;G01N15/06;;G16H20/30;;G16H40/63;;A61F2007/0234;;A61F2007/0096;;A61B5/6805;;A61B5/02416;;G01N15/0205;;G01N15/075;;A41D1/005;;G01N2015/1493;;A61F7/00;;A61B5/02233;;A61B5/6804;;A61B5/02055;;A61B5/4836;;G16H40/67;;G16H50/20;;G16H20/30;;G01N15/06;;G01N15/14;;G01N33/0047;;A41D13/0025;;A61B5/14532;;A61F2…	A41D1/00;;A41D13/002;;A41D27/28;;A61B5/00;;A61B5/0205;;A61B5/022;;A61B5/145;;A61B5/1455;;A61B5/332;;A61F7/00;;G01N15/06;;G01N15/075;;G01N15/14;;G01N33/00;;G16H20/30;;G16H40/67;;G16H50/20		0	0				ACTIVE	X
111	US	B2	US 11426102 B2	178-577-033-475-590	44803	2022	US 202016917421 A	44012	US 202016917421 A	44012	Diabetes prediction using glucose measurements and machine learning	Diabetes prediction using glucose measurements and machine learning is described. In one or more implementations, the observation analysis platform includes a machine learning model trained using historical glucose measurements and historical outcome data of a user population to predict a diabetes classification for an individual user. The historical glucose measurements of the user population ma…	DEXCOM INC	FRANK SPENCER;;PRICE DAVID;;STROYECK CHUCK;;HAMES KAZANNA CALAIS	DEXCOM INC (2020-08-10)	https://lens.org/178-577-033-475-590	Granted Patent	yes	8	2	10	189-950-708-331-90X;;178-577-033-475-590;;133-812-914-614-583;;195-159-910-758-395;;077-724-832-132-75X;;012-151-375-447-049;;050-377-081-623-422;;000-648-257-625-420;;117-441-000-218-883;;011-456-507-930-296	CN;;EP;;JP;;US;;CA;;AU;;WO	10	189-950-708-331-90X;;178-577-033-475-590;;133-812-914-614-583;;077-724-832-132-75X;;195-159-910-758-395;;012-151-375-447-049;;050-377-081-623-422;;000-648-257-625-420;;117-441-000-218-883;;011-456-507-930-296	CN;;EP;;JP;;US;;CA;;AU;;WO	0	G16H50/20;;G16H50/30;;G16H40/67;;G16H20/00;;G16H15/00;;A61B5/0022;;A61B5/14532;;A61B5/14503;;A61B5/14865;;A61B5/6833;;A61B5/7267;;A61B5/7275;;A61B5/7282;;A61B5/746;;A61B5/14532;;A61B5/7267;;A61B5/0024;;A61B5/6847;;A61B5/7275;;G16H50/20;;A61B5/14865;;G16H20/00;;G16H10/60;;G16H15/00	A61B5/145;;A61B5/00;;A61B5/1486;;G16H10/60;;G16H15/00;;G16H20/00;;G16H50/20		0	0				ACTIVE	X
112	US	B2	US 10995366 B2	022-771-987-494-399	44320	2021	US 201615367015 A	42705	US 201615367015 A;;US 201314106661 A;;US 201261737237 P	41257	Methods and devices for detection and acquisition of biomarkers	The present invention provides devices and methods for detecting and capturing molecular biomarkers from a subject in situ. Specifically, the devices contain an array of microneedles to which are attached probes specific for one or more biomarkers of interest. The devices can be used directly on a subject (e.g., via skin piercing) in detecting the biomarkers in the body of the subject (e.g., tiss…	MINDERA CORP;;SCRIPPS RESEARCH INST	MAHMOOD TAHIR A;;DICKERSON TOBIN J;;MAHMOOD NADIR A;;CAPEK PETR	THE SCRIPPS RESEARCH INSTITUTE (2016-12-08);;MINDERA CORPORATION (2016-12-14)	https://lens.org/022-771-987-494-399	Granted Patent	yes	47	2	36	133-771-424-373-360;;141-826-335-773-755;;127-807-350-650-656;;086-498-562-610-339;;118-311-404-115-97X;;026-193-438-255-209;;065-607-464-546-861;;062-950-062-042-74X;;076-645-193-555-462;;017-291-782-748-320;;082-614-191-034-212;;172-939-292-690-84X;;019-090-197-680-814;;090-088-520-439-492;;093-617-483-537-455;;037-777-597-634-570;;022-771-987-494-399;;069-380-121-416-362;;067-349-915-868-709;;…	CN;;KR;;EP;;JP;;HK;;US;;AU;;CA;;WO	36	133-771-424-373-360;;141-826-335-773-755;;127-807-350-650-656;;086-498-562-610-339;;118-311-404-115-97X;;026-193-438-255-209;;065-607-464-546-861;;062-950-062-042-74X;;076-645-193-555-462;;017-291-782-748-320;;082-614-191-034-212;;172-939-292-690-84X;;019-090-197-680-814;;090-088-520-439-492;;093-617-483-537-455;;037-777-597-634-570;;022-771-987-494-399;;069-380-121-416-362;;067-349-915-868-709;;…	CN;;KR;;EP;;JP;;HK;;US;;AU;;CA;;WO	2	A61B5/150015;;A61B5/150022;;A61B5/150984;;A61B5/685;;A61B5/14514;;A61B5/1468;;A61B2562/046;;A61K9/0021;;C12Q1/6806;;A61B10/0045;;A61B10/0233;;A61B2010/008;;C12Q1/6837;;C12Q1/6841;;G01N33/54366;;G01N33/553;;C12Q1/6837;;C12Q1/6841;;A61B5/14514;;G01N2800/20;;A61B5/150984;;A61B5/685;;G01N2800/16;;C12Q2543/10;;A61K9/0021;;C12Q1/6806;;A61B5/150015;;A61B5/150022;;A61B5/150984;;A61B5/685;;A61B5/14514;;A6…	C12Q1/6841;;A61B5/00;;A61B5/145;;A61B5/1468;;A61B5/15;;A61B10/00;;A61B10/02;;A61K9/00;;C12Q1/6806;;C12Q1/6837;;C12Q1/6876;;G01N1/08		60	51	035-466-798-530-742;;016-590-136-897-288;;106-883-216-086-487;;038-599-138-507-721;;014-583-412-527-761;;019-278-757-718-935;;015-205-178-404-015;;152-909-055-620-503;;146-606-185-618-094;;006-442-436-248-354;;015-668-402-278-262;;126-531-154-996-616;;146-475-788-415-66X;;028-955-494-503-343;;146-437-632-186-752;;014-524-302-477-134;;144-037-542-728-540;;109-553-992-963-291;;038-301-608-488-605;;…	10.1038/nmeth.1315;;19349980;;10.1006/abio.1999.4363;;10660453;;19457569;;10.1016/j.lungcan.2009.04.009;;10.1042/bj2780735;;1898362;;pmc1151408;;10.1101/gr.1.1.17;;1842916;;10.1126/science.1990438;;1990438;;20334955;;10.1016/j.gastrohep.2009.12.011;;19968820;;10.1111/j.1755-148x.2009.00660.x;;pmc2879036;;2308948;;10.1073/pnas.87.5.1874;;pmc53586;;7816638;;10.1093/nar/22.24.5456;;pmc332096;;10.102…	Tang et al. (Nature Methods, vol. 6, No. 5, May 2009, pp. 377-382, and online methods (Year: 2009).;;Arenkov, et al. Protein Microchips: Use for Immunoassay and Enzymatic Reactions. Analytical Biochemistry. 2000; 278(2):123-131.;;Chen, et al. Analysis of GD2/GM2 synthase mRNA as a biomarker for small cell lung cancer. Lung Cancer. Feb. 2010; 67(2):216-20. doi: 10.1016/j.lungcan.2009.04.009. Epub …	ACTIVE	X
113	US	B2	US 9943264 B2	053-096-002-184-467	43207	2018	US 201314051440 A	41557	US 201314051440 A;;US 201261712100 P	41192	Wearable wireless patches containing electrode pair arrays for gastrointestinal electrodiagnostics	A system and method for profiling electrical activity in smooth muscle of the gastrointestinal tract muscular of a patient are disclosed. The system includes electromyographic-sensing patches adapted for placement on the skin of the abdomen of the patient. Each patch has at least one bipolar electrode pair, or a multitude arranged in an array, and is enabled for communication of a signal indicati…	GTECH;;G TECH MEDICAL INC	AXELROD STEVE;;NAVALGUND ANAND;;HOFFMAN ERIC A;;DEVANABOYINA UDAY SANKAR	GTECH (2016-11-03)	https://lens.org/053-096-002-184-467	Granted Patent	yes	32	11	2	082-188-196-744-900;;053-096-002-184-467	US	23	086-103-591-798-255;;021-149-097-171-487;;183-861-090-006-415;;057-409-914-828-27X;;042-842-583-516-88X;;180-545-688-106-070;;132-895-322-525-94X;;043-258-750-948-107;;069-701-737-188-227;;181-940-025-020-360;;156-286-840-685-81X;;060-701-195-678-098;;053-851-662-350-893;;039-311-485-866-05X;;075-516-180-574-19X;;021-163-346-469-905;;046-221-882-646-282;;058-598-199-154-860;;160-833-560-178-666;;…	EP;;US;;WO	0	A61B5/6823;;A61B5/0004;;A61B5/296;;A61B5/392;;A61B5/6823;;A61B5/0004;;A61B5/296;;A61B5/392	A61B5/00;;A61B5/296		15	11	177-760-217-405-430;;011-698-383-106-984;;075-662-752-117-265;;003-741-038-104-030;;016-329-567-993-969;;042-294-383-432-986;;066-447-745-297-618;;122-960-711-104-052;;053-181-183-186-758;;143-645-159-564-443;;112-533-552-584-407	10.2478/v10048-009-0022-6;;10444457;;10.1152/ajpgi.1999.277.2.g424;;10817025;;10.3349/ymj.2000.41.2.230;;15977728;;10.1109/tbme.2005.846730;;10.1109/10.237682;;8262544;;19359425;;10.1152/ajpgi.90581.2008;;10.1111/j.1572-0241.1999.01007.x;;10201477;;10.1016/s0002-9270(99)00062-3;;6532268;;10.1007/bf02407776;;10.1046/j.1365-2982.2003.00430.x;;14507347;;10.1109/issmdbs.2008.4575018;;16460275;;10.114…	Haddab, S. et al. “Microcontroller-Based System for Electrogastrography Monitoring Through Wireless Transmission”; Measurement Science Review, vol. 9, No. 5, 2009, p. 122-126.;;Chen, JDZ et al.; “Detection of gastric slow wave propagation from the cutaneous electrogastrogram”; Am. J. Physiol. 277 (Gastronintest. Liver Physiol. 40): G424-G430, 1999.;;Kim, D, W; et al. “Usefulness of a Developed Fo…	ACTIVE	X
115	US	B2	US 11647954 B2	119-336-447-351-726	45062	2023	US 201916677881 A	43777	US 201916677881 A	43777	Ear device for heat stroke detection	A method is presented for predicting heat stroke of a subject. The method includes an earbud covered with a waterproof moisture permeable membrane allowing for moisture penetration, the earbud including an infrared (IR) temperature sensor for measuring core body temperature of the subject, wherein the IR temperature sensor is covered with a waterproof IR transmittable film to inhibit water drops …	IBM	MATSUMOTO KEIJI;;MICHEL BRUNO	INTERNATIONAL BUSINESS MACHINES CORPORATION (2019-11-08)	https://lens.org/119-336-447-351-726	Granted Patent	yes	12	0	2	008-127-014-778-489;;119-336-447-351-726	US	2	008-127-014-778-489;;119-336-447-351-726	US	0	A61B5/0008;;A61B5/0006;;A61B5/0022;;A61B5/01;;A61B5/02433;;A61B5/02438;;A61B5/332;;A61B5/389;;A61B5/4266;;A61B5/6817;;A61B5/746;;A61B2562/0276;;A61B2562/029;;A61B5/6817;;A61B5/0008;;A61B5/01;;A61B5/02433;;A61B5/0878;;A61B5/4266	A61B5/00;;A61B5/01;;A61B5/024;;A61B5/087		8	0			Burrows, “The future is ear: Why “hearables” are finally tech's next big thing”, https://www.fastcompany.com/90212065/the-future-is-ear-why-hearables-are-finally-techs-next-big-thing. Aug. 14, 2 019. pp. 1-14.;;Daiichi-Kagaku, “Extreme Humidity! Part 21 . . . Type and Selection of Humidity Sensor | Temperature x Humidity x Pressure =”, https://www.daiichi-kagaku.co.jp/blog/labo/?p=603&doing_wp_cr…	ACTIVE	X
116	US	B2	US 10229754 B2	054-098-727-327-360	43536	2019	US 201615552383 A	42437	US 201615552383 A;;EP 15177458 A;;US 201562130226 P;;EP 2016054837 W	42072	Wearable device obtaining audio data for diagnosis	Systems, devices, and methods for providing audio database for health systems that may utilize wearable devices that monitor wearable sensor readings for symptoms associated with a disease and that may prompt a user of the wearable device to place a microphone from the wearable device on a specific location on the user's body for recording an audio file that may be sent to a health professional f…	KONINKLIJKE PHILIPS NV	CRONIN JOHN E;;PHILBIN STEVEN M	KONINKLIJKE PHILIPS N.V (2017-10-05)	https://lens.org/054-098-727-327-360	Granted Patent	yes	7	1	7	131-418-612-610-773;;105-001-961-641-395;;054-098-727-327-360;;197-842-830-376-118;;040-268-224-625-447;;027-843-895-255-026;;194-246-213-209-461	CN;;EP;;JP;;US;;WO	7	131-418-612-610-773;;105-001-961-641-395;;054-098-727-327-360;;040-268-224-625-447;;197-842-830-376-118;;027-843-895-255-026;;194-246-213-209-461	CN;;EP;;JP;;US;;WO	0	A61B5/746;;A61B5/0024;;A61B5/02055;;A61B5/021;;A61B5/024;;A61B5/0816;;A61B5/0823;;A61B5/11;;A61B5/14532;;A61B5/14542;;A61B5/681;;A61B2560/0242;;G16Z99/00;;G16H40/63;;A61B5/00;;A61B5/0024;;A61B5/02055;;A61B5/021;;A61B5/024;;A61B5/0816;;A61B5/0823;;A61B5/11;;A61B5/14532;;A61B5/14542;;A61B5/681;;A61B5/746;;A61B2560/0242;;G16H40/67;;G16H50/20;;G16H70/60;;G16Z99/00;;G16H40/63;;A61B5/00;;A61B5/0022;;A6…	G16H40/63;;A61B5/00;;A61B5/0205;;A61B5/021;;A61B5/024;;A61B5/08;;A61B5/11;;A61B5/145;;G16Z99/00		0	0				ACTIVE	X
117	US	B2	US 11889994 B2	123-099-483-089-954	45328	2024	US 202017013337 A	44078	US 202017013337 A;;US 201916441536 A;;US 201862691355 P	43279	Menstrual cycle tracking	Health information for a woman can be used to predict timing of events related to the woman's menstrual cycle. If available, historical cycle information for a woman can be used to predict upcoming cycle events, such as the start and stop of menstruation. To improve the accuracy of those predictions, one or more health metrics are monitored for the woman that can be correlated with the menstrual …	FITBIT INC	LAFON BELEN;;SARANTOS CHRIS HANRAHAN;;HENEGHAN CONOR JOSEPH;;NIEHAUS LOGAN;;WASSON JACLYN LEVERETT;;DESS PETER COLIN;;FARJADIAN AMIR BAHADOR;;BEATTIE ZACHARY TODD;;GHOREYSHI ATIYEH;;WU ALLISON SHIH	FITBIT INC (2019-06-14)	https://lens.org/123-099-483-089-954	Granted Patent	yes	4	0	6	082-876-590-114-404;;194-850-276-835-17X;;123-099-483-089-954;;116-441-252-666-707;;009-234-394-384-640;;042-457-181-569-216	EP;;US;;WO	6	194-850-276-835-17X;;082-876-590-114-404;;123-099-483-089-954;;116-441-252-666-707;;009-234-394-384-640;;042-457-181-569-216	EP;;US;;WO	0	A61B5/4325;;A61B5/02416;;A61B5/02438;;A61B5/14551;;A61B5/681;;A61B5/7267;;A61B5/7275;;A61B5/7278;;A61B5/7282;;A61B10/0012;;A61B2010/0019;;A61B2010/0029;;G16H40/63;;G16H50/30;;A61B10/0012;;A61B5/01;;A61B5/02055;;A61B5/02405;;A61B5/02433;;A61B5/1118;;A61B5/14546;;A61B5/14551;;A61B5/4815;;A61B5/681;;A61B5/742;;A61B2010/0019	A61B5/01;;A61B5/00;;A61B5/0205;;A61B5/024;;A61B5/11;;A61B5/145;;A61B5/1455;;A61B10/00		10	6	066-085-560-962-946;;011-048-427-107-352;;016-853-781-486-272;;180-030-945-877-51X;;000-162-807-552-001;;013-257-884-246-909	10.1046/j.1365-2281.2000.00285.x;;11100398;;10.1007/s00421-002-0634-0;;12172867;;28465583;;pmc5431053;;10.1038/s41598-017-01433-9;;30998226;;10.2196/13404;;pmc6495289;;10.1073/pnas.071511098;;pmc31850;;11287650;;15189092;;10.1117/1.1691028	Moran et al., “Cardiovascular Functioning During the Menstrual Cycle”, Department of Nursing Studies, St. Martin's College, Lancaster LA1 3JD, UK and Unilever Research Colworth, Colworth House, Shambrook, Bedford, MK44 1LQ, UK; Clinical Physiology 20, vol. 6, pp. 496-504, Blackwell Science Ltd., 2000.;;Seebauer et al., “Changes of Respiratory Sinus Arrhythmia During the Menstrual Cycle Depend on …	ACTIVE	X
118	US	B2	US 10156867 B2	163-485-352-923-562	43452	2018	US 201715444217 A	42793	US 201715444217 A;;US 201414556062 A;;US 201462006835 P;;US 201361910201 P	41607	Wearable computing device	The present disclosure describes a wearable computing device (WCD) in the form of a ring that can be worn on the finger of a human user.	MOTIV INC;;MOTIV INC	VON BADINSKI CURT C;;STRASSER MICHAEL J;;TWISS PETER	MOTIVE (ABC) LLC (2020-03-27);;TWIN MERGER SUB II LLC (2023-05-22);;OURARING INC (2023-05-26);;MOTIV INC (2018-08-22);;PROXY INC (2020-03-27)	https://lens.org/163-485-352-923-562	Granted Patent	yes	85	39	106	037-369-053-973-459;;187-526-534-209-529;;046-894-293-679-947;;192-112-096-062-002;;189-195-944-710-622;;158-783-389-300-769;;125-590-472-787-389;;136-870-372-559-632;;015-399-115-708-001;;127-180-989-378-773;;048-059-636-939-194;;152-784-707-738-229;;109-672-270-927-135;;057-614-437-140-909;;016-252-646-803-69X;;157-915-694-034-319;;062-734-814-152-161;;175-337-493-631-863;;121-628-237-594-806;;…	CN;;EP;;JP;;US;;CA;;WO	110	037-369-053-973-459;;046-894-293-679-947;;187-526-534-209-529;;192-112-096-062-002;;189-195-944-710-622;;158-783-389-300-769;;125-590-472-787-389;;154-762-169-827-616;;136-870-372-559-632;;127-180-989-378-773;;015-399-115-708-001;;048-059-636-939-194;;152-784-707-738-229;;109-672-270-927-135;;057-614-437-140-909;;016-252-646-803-69X;;157-915-694-034-319;;062-734-814-152-161;;121-628-237-594-806;;…	CN;;EP;;JP;;US;;CA;;WO	0	A61B5/681;;A61B5/6826;;A61B2560/0214;;A61B2560/0412;;A61B2562/146;;A61B2562/164;;A61B2562/166;;Y02E10/52;;G06F1/163;;G08C17/02;;A61B5/681;;A61B5/6826;;A61B2560/0214;;A61B2560/0412;;A61B2562/146;;A61B2562/164;;A61B2562/166;;Y02E10/52;;H02J7/35;;A61B5/332;;A61B5/349;;G06V40/10;;G06V40/70;;G06V40/15;;G06V10/751;;G01P15/00;;G04G21/02;;G06F1/163;;G06F3/014;;G06F3/017;;G08B21/02;;G08C17/02;;G06F1/1635;…	G06F7/04;;A61B5/00;;A61B5/01;;A61B5/0205;;A61B5/021;;A61B5/024;;A61B5/11;;A61B5/145;;A61B5/1455;;A61B5/332;;G01P15/00;;G02B19/00;;G04G21/02;;G06F1/16;;G06F3/01;;G06F3/14;;G06F12/00;;G06F12/14;;G06F13/00;;G06F17/30;;G06F21/32;;G06K9/00;;G06K9/62;;G08B5/36;;G08B21/02;;G08C17/02;;G11C7/00;;H02J7/00;;H02J7/35;;H02S40/22;;H02S99/00		2	0			SAMEDAYFLASH, “Set of 10 2GB/4GB/8GB/16GB Wooden Bamboo Flash Drive—Bulk Pack 0 USB 2.0 Wood Bamboo Stick Design—Wood USB Flash Drive”, “www.etsy.com/listing/248051205/set-of-10-2gb4gb8gb16gb-wooden-bamboo?ref+m”, Jun. 2, 2016, Publisher: Etsy, Published in: US.;;Leef, “Leef Magnet USB 3.0 Flash Drive”, “www.leefco.com/magnet-copper”, Jun. 2, 2016, Publisher: Leef Group Limited, Published in: US.	ACTIVE	X
119	US	B2	US 10729388 B2	044-666-552-418-956	44047	2020	US 201414524919 A	41939	US 201414524919 A;;US 201361896597 P	41575	Devices used in connection with continuous analyte monitoring that provide the user with one or more notifications, and related methods	Devices and methods for providing a user with alerts are provided. The alerts may take different forms, such as an output to a display, a speaker, a vibration module, a shock module, etc. The alerts provide the user with sufficient information to take appropriate action, but the devices may be of limited functionality to enhance their compactness, discreetness, wearability, etc., while also lower…	DEXCOM INC	REIHMAN ELI;;BLACKWELL JENNIFER;;BOWMAN LEIF N;;HALL THOMAS;;GRUBSTEIN KATHERINE YERRE;;MCDANIEL ZEBEDIAH L;;WIGHTLIN MATTHEW D	DEXCOM INC (2014-12-16)	https://lens.org/044-666-552-418-956	Granted Patent	yes	16	18	12	126-340-746-256-062;;131-077-081-056-554;;044-666-552-418-956;;142-427-408-320-596;;008-076-584-547-941;;151-789-951-271-225;;073-191-084-127-896;;151-937-600-965-753;;115-626-720-090-353;;025-377-261-144-406;;191-110-263-443-377;;182-174-715-328-000	EP;;US;;WO	12	126-340-746-256-062;;131-077-081-056-554;;142-427-408-320-596;;044-666-552-418-956;;008-076-584-547-941;;151-789-951-271-225;;073-191-084-127-896;;151-937-600-965-753;;115-626-720-090-353;;025-377-261-144-406;;191-110-263-443-377;;182-174-715-328-000	EP;;US;;WO	0	A61B5/743;;A61B5/0002;;A61B5/6802;;A61B5/7257;;G16H40/63;;G16H50/50;;A61B5/746;;A61B5/14532;;G16H40/67;;Y02A90/10;;A61B5/746;;A61B5/14532;;A61B5/6824;;A61B5/6831;;A61B5/7445;;A61B5/7282;;A61B5/0004;;A61B5/743;;A61B5/0002;;A61B5/7257;;A61B5/6802;;G16H40/63;;G16H50/50;;Y02A90/10;;G16H20/17;;G16H40/67	A61B5/00;;A61B5/145;;G16H40/63;;G16H50/50		0	0				ACTIVE	X
120	US	B1	US 10252058 B1	194-362-053-525-972	43564	2019	US 201514825391 A	42229	US 201514825391 A;;US 201414205980 A;;US 201361901259 P;;US 201361861779 P;;US 201361776910 P	41345	System and method for lifestyle management	A system and method that includes receiving data from sensors such as electroencephalography, heart rate, accelerometer, blood oxygen saturation, pressure, temperature, and galvanic skin response sensors; determining user physiological information such as brain activity patterns during sleep, quantity of movement during sleep, breathing depth and rate, blood pressure, heart rate and stroke volume…	FUERST OREN;;ECO FUSION	FUERST OREN	ECO-FUSION (2015-09-22)	https://lens.org/194-362-053-525-972	Granted Patent	yes	5	44	2	028-587-896-187-076;;194-362-053-525-972	US	2	028-587-896-187-076;;194-362-053-525-972	US	0	A63F13/212;;A61B5/0022;;A61B5/01;;A61B5/0205;;A61B5/021;;A61B5/024;;A61B5/026;;A61B5/14542;;A61B5/165;;A61B5/369;;A61B5/4266;;A61B5/4806;;A61B5/4836;;A61B5/6803;;A61B5/681;;A61B2562/0219;;A61M21/02;;A61M2021/005;;A61M2021/0072;;A61M2205/18;;A61M2205/332;;A61M2205/3553;;A61M2205/3584;;A61M2205/3592;;A61M2205/502;;A61M2205/52;;A61M2209/088;;A61M2230/04;;A61M2230/06;;A61M2230/10;;A61M2230/205;;A61M2…	A61N1/36;;A61B5/00;;A61B5/0205;;A61B5/021;;A61B5/0476;;A61B5/145;;A61B5/16;;A61M21/02;;A63F13/212		0	0				ACTIVE	X
121	US	B2	US 11309083 B2	087-239-133-058-507	44670	2022	US 202016907134 A	44001	US 202016907134 A;;US 202016896184 A;;US 201916721389 A;;US 201816140080 A;;US 201715699427 A;;US 201615295144 A;;US 201514862033 A;;US 201514862081 A;;US 201514860646 A;;US 202063026368 P;;US 201962882094 P;;US 201962880262 P;;US 201962875684 P;;US 201962825514 P;;US 201962793293 P;;US 201862690413 P;;US 201862690341 P;;US 201862618782 P;;US 201762580952 P;;US 201762531863 P;;US 201762500419 P;;…	41904	Systems for identification and tracking vital signs in the field with redundant electronic/visual security mechanisms	A system for identifying, monitoring the health of an individual and providing for the retrieval of information relating to said individual by a plurality of authorized users The system comprises an identification device and associated hardware and software components. The identification device a skin wearable, waterproof, non-transferable frangible individual identification device comprising (1)…	IDION LLC	COSTANTINO PETER;;GILVARY MICHAEL	AION BIOSYSTEMS INC (2024-07-19);;IDION LLC (2021-03-27)	https://lens.org/087-239-133-058-507	Granted Patent	yes	2	2	2	087-239-133-058-507;;016-475-295-920-410	US	27	097-610-110-879-632;;093-156-131-375-027;;048-650-329-471-120;;192-768-216-757-805;;056-971-949-565-31X;;087-239-133-058-507;;146-965-103-214-323;;140-839-040-874-854;;016-455-962-898-176;;018-061-076-706-660;;017-965-762-382-155;;141-282-764-331-717;;028-092-606-765-495;;167-582-817-688-022;;093-281-421-184-432;;016-475-295-920-410;;144-005-807-827-127;;067-643-526-124-025;;009-613-562-958-931;;…	EP;;JP;;US;;WO	0	G06Q30/0185;;A61B5/0022;;A61B5/0205;;A61B5/6833;;A61B90/96;;A61B90/98;;G06F21/36;;G06K19/0723;;G06K19/07762;;G06Q50/265;;G16H10/65;;G16H15/00;;G16H40/67;;G16H50/30;;G16H50/80;;H04W4/029;;H04W4/80;;H04W4/90;;G16H40/67;;A61B5/0022;;A61B5/0205;;A61B5/02438;;A61B5/1112;;A61B5/14551;;A61B5/6833;;A61B90/90;;A61B90/96;;A61B90/98;;A61B2562/166;;A61B2562/18;;G06F21/44;;G06K7/1417;;G06Q30/0185;;G06Q50/265;…	G06K7/14;;A61B5/00;;A61B5/0205;;A61B5/024;;A61B5/11;;A61B5/1455;;A61B90/90;;A61B90/96;;A61B90/98;;G06F21/44;;G06Q30/00;;G06Q50/26;;G16H10/65;;G16H40/67;;G16H50/30;;G16H50/80;;H04W4/029;;H04W4/38;;H04W4/80		0	0				ACTIVE	X
122	US	B2	US 11389096 B2	146-271-350-147-133	44761	2022	US 201715453920 A	42803	EP 16188227 A	42623	Bio-fluid collection and sensing device, system and method	An on-body wearable bio-fluid collection and sensing device including an interface or interface surface comprising at least one biocompatible material for contacting a bodily part; at least one inlet for receiving the bio-fluid, at least one outlet for evacuating the bio-fluid, a plurality of semiconductor sensors configured to analyze the received bio-fluid, at least one reference electrode for …	ECOLE POLYTECHNIQUE FED LAUSANNE EPFL	IONESCU MIHAI ADRIAN;;GUERIN HOËL;;GARCÍA CORDERO ERICK;;BELLANDO FRANCESCO	ECOLE POLYTECHNIQUE FEDERALE DE LAUSANNE (EPFL) (2022-07-11)	https://lens.org/146-271-350-147-133	Granted Patent	yes	33	2	6	128-970-000-944-116;;178-287-479-299-805;;003-240-464-907-068;;187-590-234-703-206;;146-271-350-147-133;;129-628-553-503-807	EP;;US;;WO	7	128-970-000-944-116;;178-287-479-299-805;;187-590-234-703-206;;146-271-350-147-133;;094-415-127-909-516;;129-628-553-503-807;;003-240-464-907-068	EP;;US;;WO	0	A61B5/1477;;A61B5/150022;;A61B5/150969;;A61B5/157;;A61B5/4266;;A61B10/0045;;A61B2562/0247;;A61B2562/0271;;A61B2562/028;;A61B2562/0285;;A61B2562/0295;;G01N27/4145;;G01N33/54366;;A61B5/1477;;A61B5/150022;;A61B5/150358;;A61B5/150969;;A61B5/157;;A61B5/4266;;A61B10/0045;;A61B2562/0247;;A61B2562/0271;;A61B2562/028;;A61B2562/0285;;A61B2562/0295;;G01N27/122;;G01N27/4145;;G01N33/54366	A61B10/00;;A61B5/00;;A61B5/1477;;A61B5/15;;A61B5/157;;G01N27/12;;G01N27/414;;G01N33/543		20	13	018-231-930-647-524;;076-819-830-896-014;;057-058-378-163-11X;;038-245-584-298-183;;084-847-930-679-410;;094-420-329-633-446;;014-524-893-347-63X;;097-073-358-871-852;;013-594-049-775-302;;030-681-607-709-919;;114-078-819-019-855;;177-303-146-121-84X;;060-345-846-492-652	pmc1769313;;14624612;;10.1021/ja0354566;;10.1038/nature05061;;16871206;;10.1038/nature16521;;26819044;;pmc4996079;;10.1109/essderc.2016.7599683;;10.1002/elan.201600018;;10.1117/2.1201605.006498;;17180214;;10.1039/b609813d;;10.1016/j.proeng.2012.09.273;;10.1039/c3lc50691f;;23978958;;10.1109/mikon.2016.7491935;;22113811;;10.1109/titb.2011.2176498;;10.1109/nfc.2011.11;;10.1109/mwscas.2012.6292180	Song H, Ismagilov RF. “Millisecond Kinetics on a Microfluidic Chip Using Nanoliters of Reagents.”;Journal of the American Chemical Society. 2003;125 (47), 14613-14619 (Year: 2003).;;European Search Report dated Feb. 8, 2017.;;Craighead, Harold. “Future lab-on-a-chip technologies for interrogating individual molecules.” Nature 442.7101 (2006): 387-393.;;Gao, Wei, et al. “Fully integrated wearable …	ACTIVE	X
123	US	B2	US 11540750 B2	082-414-009-242-239	44929	2023	US 201816225768 A	43453	US 201816225768 A	43453	Systems and methods for physiological characteristic monitoring	A physiological characteristic monitoring system includes a physiological characteristic sensor that observes a physiological characteristic and generates sensor signals based on the observation. The physiological characteristic sensor includes a sensor connector. The physiological characteristic monitoring system includes a wearable device to be worn by a user in a first configuration and having…	MEDTRONIC MINIMED INC	VADDIRAJU SANTHISAGAR;;DARBANDI BEJAN M;;MAIRS NICHOLAS S;;ROSS BRIAN	MEDTRONIC MINIMED INC (2019-01-17)	https://lens.org/082-414-009-242-239	Granted Patent	yes	91	0	3	082-414-009-242-239;;172-193-624-903-795;;184-133-913-071-607	US	3	082-414-009-242-239;;172-193-624-903-795;;184-133-913-071-607	US	0	A61B5/0022;;A61B5/01;;A61B5/0205;;A61B5/14532;;A61B5/14546;;A61B5/681;;A61B5/7275;;A61B2562/0219;;A61B5/14532;;A61B5/0022;;A61B5/01;;A61B5/0205;;A61B5/14546;;A61B5/681;;A61B5/7275;;A61B2562/0219	A61B5/145;;A61B5/00;;A61B5/01;;A61B5/0205		0	0				ACTIVE	X
126	US	B2	US 11596329 B2	081-751-336-916-65X	44992	2023	US 202016872522 A	43963	US 202016872522 A;;US 201715625087 A;;US 201662351734 P;;US 201662422536 P	42538	Soft, wearable microfluidic systems capable of capture, storage and sensing of biofluids	The invention provides systems for handling biofluids including the transport, capture, collection, storage, sensing, and/or evaluation of biofluids released by tissue. Systems of some aspects provide a versatile platform for characterization of a broad range of physical and/or chemical biofluid attributes in real time and over clinically relevant timeframes. Systems of some aspects provide for c…	UNIV ILLINOIS;;UNIV NORTHWESTERN	ROGERS JOHN A;;CHOI JUNGIL;;KIM SUNGBONG	THE BOARD OF TRUSTEES OF THE UNIVERSITY OF ILLINOIS (2017-07-21);;NORTHWESTERN UNIVERSITY (2017-07-21)	https://lens.org/081-751-336-916-65X	Granted Patent	yes	136	1	5	053-215-561-673-08X;;193-181-619-788-28X;;081-751-336-916-65X;;132-012-151-817-830;;009-838-858-571-32X	US;;WO	5	053-215-561-673-08X;;193-181-619-788-28X;;081-751-336-916-65X;;132-012-151-817-830;;009-838-858-571-32X	US;;WO	0	A61B5/14517;;A61B5/6833;;B01L3/5027;;B01L2300/0627;;B01L2300/0803;;B01L2300/0864;;B01L2300/0883;;B01L2300/123;;B01L2400/0406;;A61B5/14517;;A61B5/0059;;A61B5/6833;;A61B2560/0214;;A61B2560/0462;;B01L3/5027;;B01L2300/0627;;B01L2300/0803;;B01L2300/0864;;B01L2300/0883;;B01L2300/123;;B01L2400/0406;;G01N33/50	A61B5/145;;A61B5/00;;B01L3/00;;G01N33/50		98	92	076-271-727-828-469;;049-512-331-323-822;;017-328-706-854-275;;022-706-801-398-796;;050-667-049-913-441;;037-795-241-983-904;;001-480-673-852-884;;025-756-800-030-409;;049-315-069-940-434;;078-558-477-976-426;;105-801-700-996-599;;002-123-540-661-647;;028-709-552-602-62X;;022-354-975-824-891;;036-956-164-476-252;;073-942-268-355-038;;038-666-958-357-746;;054-682-627-295-261;;021-410-786-777-261;;…	16158367;;10.1055/s-2004-830380;;30746477;;10.1126/sciadv.aav3294;;pmc6357758;;10.1002/adma.201902109;;31206791;;24333582;;10.1016/j.bios.2013.11.039;;10.1039/c2an36422k;;23113321;;10.1088/0960-1317/17/5/023;;10.1002/bmc.2713;;22311625;;10.1063/1.1289816;;10.1152/jappl.1984.56.5.1302;;6327585;;10.1039/c1lc20714h;;22041708;;10.1109/jmems.2002.805055;;10.1007/s10404-007-0196-x;;10.1016/j.jcis.2006.…	U.S. Appl. No. 15/625,087, filed Jun. 16, 2017.;;Alvear-Ordenes, I. et al., “Sweat lactate, ammonia, and urea in rugby players,” Int J Sports Med, 26 (2005), pp. 632-637.;;Bandodkar et al. “Battery-free, skin-interfaced microfluidic/electronic systems for simultaneous electrochemical, colorimetric, and volumetric analysis of sweat,” Sci. Adv. 5: eaav3294, Jan. 18, 2019, 15 pages.;;Bandodkar et al…	ACTIVE	X
127	US	B2	US 11678818 B2	199-997-842-336-34X	45097	2023	US 201816332477 A	43300	CN 201711349086 A;;CN 2018096237 W	43084	Blood glucose detection device and method of determining blood glucose level	The present disclosure generally relates to the field of blood glucose monitoring. A device for determining a blood glucose level includes a first light emitting unit configured to emit a first light; a second light emitting unit configured to emit a second light, wherein one of the first light and the second light is configured to be insensitive to glucose content in blood; a first light receivi…	BOE TECHNOLOGY GROUP CO LTD	HAN LITONG	BOE TECHNOLOGY GROUP CO. LTD (2019-03-06)	https://lens.org/199-997-842-336-34X	Granted Patent	yes	24	0	4	199-997-842-336-34X;;145-597-235-926-653;;024-360-176-199-106;;018-062-111-246-730	CN;;US;;WO	4	199-997-842-336-34X;;145-597-235-926-653;;024-360-176-199-106;;018-062-111-246-730	CN;;US;;WO	0	G01N21/3577;;G01N21/359;;A61B5/14532;;A61B5/1455;;A61B5/6826;;G01N21/3151;;G01N21/3577;;G01N2021/3181;;A61B5/14532;;A61B5/1455;;A61B5/6826;;A61B5/6838;;A61B5/7225;;A61B5/7278;;A61B2562/0238	A61B5/1455;;A61B5/00;;A61B5/145		2	0			Search Report and Written Opinion, dated Nov. 1, 2018, issued in counterpart International Application No. PCT/CN2018/096237 (11 pages; in English).;;Office Action dated Dec. 25, 2019 issued in counterpart Chinese Application No. 201711349086.9 (w/ English machine translation; 22 pages).	ACTIVE	X
128	US	B2	US 11331020 B2	152-547-228-905-975	44698	2022	US 202117169193 A	44232	US 202117169193 A;;US 202062971012 P	43867	Enzyme-based electrochemical nicotine biosensor	Described herein is an amperometric biosensor, e.g., chronoamperometric biosensor for the measurement of the concentration of nicotine. Also disclosed herein is a wearable nicotine biosensor device and a biosensor that detects nicotine in smoke. The biosensor disclosed herein comprises a nicotine-catalyzing enzyme, such as NicA2 or mutant NicA2 enzymes. Also described herein are systems comprisin…	UNIV BOSTON	GALAGAN JAMES;;GRINSTAFF MARK W;;KUZMANOVIC UROS;;CHEN MINGFU;;TARARINA MARGARITA ALEXANDROVNA;;ALLEN KAREN NAZARETIAN	TRUSTEES OF BOSTON UNIVERSITY (2021-02-14)	https://lens.org/152-547-228-905-975	Granted Patent	yes	55	1	3	046-942-664-341-894;;152-547-228-905-975;;172-839-071-097-921	US;;WO	3	046-942-664-341-894;;152-547-228-905-975;;172-839-071-097-921	US;;WO	7	A61B5/14517;;A61B5/1486;;A61B5/4845;;A61B10/0064;;C12Q1/004;;C12Q1/005;;C12Q1/26;;G01N27/3272;;G01N33/48714;;A61B10/0045;;A61B5/1486;;A61B5/4845;;A61B5/14517;;G01N33/48714;;A61B10/0064;;C12Q1/26;;C12Q1/004;;G01N27/3272;;C12Q1/005	A61B5/1486;;A61B5/00;;A61B5/145;;A61B10/00;;C12Q1/00;;C12Q1/26;;G01N27/327;;G01N33/487		109	104	042-181-679-676-655;;011-093-378-192-45X;;042-184-881-513-933;;080-700-142-516-838;;089-494-270-625-003;;039-966-793-797-41X;;058-238-114-384-634;;044-929-074-524-376;;014-453-319-154-520;;132-540-076-355-443;;011-300-695-022-488;;033-000-087-305-664;;000-710-457-174-745;;091-528-757-579-269;;129-425-501-620-825;;123-786-557-488-910;;024-539-242-578-834;;020-214-316-223-024;;114-508-813-620-284;;…	11959464;;10.1016/s0956-5663(01)00313-x;;10.1080/00032719.2011.565445;;27374974;;10.1038/srep29230;;pmc4931682;;10.1039/c6ra03399g;;25897989;;10.1021/acs.analchem.5b00774;;10.1016/j.chembiol.2012.06.009;;22921067;;26156958;;10.5664/jcsm.5288;;pmc4661339;;pmc4296904;;25419960;;10.1038/nmeth.3179;;10.1016/j.jelechem.2016.12.009;;10356264;;10.1021/bp990037r;;9010705;;10.1007/s002280050204;;10.1093/n…	A. Chaubey, et al. “Mediated Biosensors”, Biosensors and Bioelectronics, 17(6-7), p. 441-456, (Jun. 2002).;;K. Kivirand, et al. “Biosensors for Biogenic Amines: The Present State of the Art Mini-Review”, Analytical Letters, 44(17), p. 2821-2833, (Nov. 2011).;;Application Note E-4 Subject: A Review of Techniques for Electrochemical Analysis, Princeton Applied Research, accessed on Jul. 6, 2021; 15…	ACTIVE	X
129	US	B2	US 11154223 B2	096-712-872-592-831	44495	2021	US 202017008577 A	44074	US 202017008577 A;;US 201962894155 P	43707	Biomarker monitoring fitness system	Disclosed herein are systems and processes for measuring, monitoring, processing, and visualizing biological data including blood glucose levels. In various embodiments, a biomarker monitoring fitness system may facilitate one or more of the monitoring of fitness data including blood glucose levels measured by continuous glucose monitoring (CGM) sensor for an individual user or group of users, th…	TT1 PRODUCTS INC	SOUTHERLAND III HAROLD PHILPOTT;;FURNEAUX TODD;;FRIAS JUAN PABLO;;MAZZE ROGER STEVEN	TT1 INC (2020-10-14);;TT1 PRODUCTS INC (2020-10-14)	https://lens.org/096-712-872-592-831	Granted Patent	yes	18	3	7	011-039-307-321-691;;154-268-215-736-595;;096-712-872-592-831;;185-401-251-189-802;;144-375-658-888-070;;080-850-549-078-52X;;046-690-550-522-189	EP;;US;;WO	7	011-039-307-321-691;;154-268-215-736-595;;096-712-872-592-831;;185-401-251-189-802;;144-375-658-888-070;;080-850-549-078-52X;;046-690-550-522-189	EP;;US;;WO	0	A61B5/14532;;A61B5/0816;;A61B5/0205;;A61B5/02055;;A61B5/021;;A61B5/024;;A61B5/14542;;A61B5/14546;;A61B5/1451;;A61B5/14539;;A61B5/4806;;A61B5/165;;A61B5/4266;;A61B5/4875;;A61B5/6833;;A61B5/6831;;A61B5/6803;;A61B5/681;;A61B5/6867;;A61B5/1118;;A61B2503/10;;A61B5/7475;;A61B5/002;;A61B5/14532;;A61B5/742;;A61B5/0004;;A61B5/7292;;A61B5/1112;;A61B5/6801;;A61B5/0024	A61B5/145;;A61B5/00;;A61B5/11		1	0			International Search Report & Written Opinion dated Jan. 25, 2021 for International Patent Application No. PCT/US20/48851.	ACTIVE	X
130	US	B2	US 10441201 B2	147-488-891-083-471	43753	2019	US 201414470386 A	41878	US 201414470386 A;;US 201461982577 P;;US 201361870529 P	41513	Noninvasive mid-infrared in vivo glucose sensor	A noninvasive mid-infrared in vivo glucose sensor for use in connection with the skin of a test subject is disclosed. The sensor includes a mid-infrared light source configured to deliver a light beam to the skin of the test subject, a collector element configured to collect backscattered light from the skin and direct it to the detector, and a detector element configured to measure the collected…	LIAKAT SABBIR;;GMACHL CLAIRE F;;MICHEL ANNA P M;;BORS KEVIN;;THE TRUSTEES OF PRINCETON UNIVERISITY	LIAKAT SABBIR;;GMACHL CLAIRE F;;MICHEL ANNA P M;;BORS KEVIN	THE TRUSTEES OF PRINCETON UNIVERSITY (2014-08-28)	https://lens.org/147-488-891-083-471	Granted Patent	yes	6	0	3	134-292-538-627-814;;147-488-891-083-471;;183-724-710-585-366	US	3	134-292-538-627-814;;147-488-891-083-471;;183-724-710-585-366	US	0	A61B5/14532;;A61B5/1455;;A61B5/1495;;A61B5/14532;;A61B5/1455;;A61B5/1495	A61B5/1455;;A61B5/145;;A61B5/1495		41	37	077-128-610-778-669;;127-468-121-010-299;;018-679-195-980-966;;120-384-379-233-016;;024-672-258-988-769;;082-544-923-987-65X;;005-785-037-120-933;;004-670-726-157-890;;089-705-824-887-177;;093-275-373-619-882;;057-745-219-423-660;;157-343-105-441-362;;028-790-531-559-002;;105-889-137-472-161;;078-590-585-660-904;;120-375-590-241-316;;020-645-939-459-994;;032-836-067-703-941;;029-625-194-566-208;;…	10.2337/diacare.10.5.622;;3677983;;10.1021/ac00162a020;;10.1007/bf02458048;;8412382;;10.1016/0169-7439(93)85002-x;;9931037;;10.1093/clinchem/45.2.165;;10.1016/s0002-9378(99)70099-2;;10561636;;10.1089/15209150152607132;;11762514;;14639751;;10.1366/000370203769699090;;10.1366/0003702054411580;;16053558;;10.1016/j.vibspec.2005.02.025;;16613642;;10.1366/000370206776593780;;21046025;;10.1039/c0an00532…	William L. Clarke et al., “Evaluating Clinical Accuracy of Systems for Self-Monitoring of Blood Glucose”, Technical Articles, 10, 622-628, Sep.-Oct. 1987.;;David M. Haaland and Edward V. Thomas, “Partial Least-Squares Methods for Spectral Analyses. 1. Relation to Other Quantitative Calibration Methods and the Extraction of Qualitative Information”, Anal. Chem., 60, 1193-1202, 1988.;;Hristison, H.…	ACTIVE	X
131	US	B2	US 11478158 B2	097-125-601-135-188	44859	2022	US 201916568580 A	43720	US 201916568580 A;;US 201815963061 A;;US 201715725330 A;;US 201715431769 A;;US 201715418620 A;;US 201615294746 A;;US 201414550953 A;;US 201514951475 A;;US 201615206215 A;;US 201314071112 A;;US 201313901131 A;;US 201962857942 P;;US 201962814713 P;;US 201962814692 P;;US 201762549587 P;;US 201662439147 P;;US 201662349277 P;;US 201662311462 P;;US 201662297827 P;;US 201562245311 P	41417	Wearable ring of optical biometric sensors	This invention is a wearable ring of optical biometric sensors comprising an arcuate array of light emitters and light receivers which is configured to collectively span at least half of the circumference of a person's wrist, finger, or arm. Light energy from the light emitters which has passed through the person's body tissue and/or has been reflected from the person's body tissue is analyzed in…	CONNOR ROBERT A;;MEDIBOTICS LLC	CONNOR ROBERT A		https://lens.org/097-125-601-135-188	Granted Patent	yes	79	1	2	097-125-601-135-188;;058-786-745-960-658	US	130	006-018-253-611-699;;111-360-680-444-91X;;192-964-403-543-966;;044-744-656-836-301;;125-025-880-844-205;;045-706-168-766-702;;149-841-851-229-795;;115-294-957-804-627;;199-808-275-111-607;;023-416-545-978-820;;055-981-660-762-542;;177-108-014-417-194;;045-393-651-592-082;;183-846-580-379-761;;064-528-870-768-61X;;083-906-446-542-675;;168-940-023-803-272;;051-264-033-245-186;;091-277-111-579-91X;;…	US	0	A61B5/681;;A61B5/0059;;A61B5/0205;;A61B5/021;;A61B5/02416;;A61B5/02438;;A61B5/14532;;A61B2562/0233;;A61B5/0205;;A61B5/021;;A61B5/02405;;A61B5/02416;;A61B5/02438;;A61B5/14532;;A61B5/14551;;A61B5/4875;;A61B5/681;;A61B5/6824;;A61B5/6826;;A61B2562/0233;;A61B2562/043	A61B5/1455;;A61B5/00;;A61B5/0205;;A61B5/021;;A61B5/024;;A61B5/145		0	0				ACTIVE	X
132	US	B2	US 11696683 B2	039-605-596-627-725	45118	2023	US 202117173181 A	44237	US 202117173181 A	44237	Medical device system	A system for interfacing an in-body medical device with an external network includes a subdermal wideband on-body network (WON) hub, which in turn includes a hub rechargeable battery, a hub processor coupled to the hub rechargeable battery, a device interface configured to communicate with the in-body medical device, and coupled to the hub processor, and a hub-satellite near field communications …	IBM	WEN BO;;DANG BING;;ROGERS JEFFREY L;;LIU DUIXIAN	INTERNATIONAL BUSINESS MACHINES CORPORATION (2021-02-09)	https://lens.org/039-605-596-627-725	Granted Patent	yes	16	1	3	026-681-508-844-811;;005-043-758-297-20X;;039-605-596-627-725	US	3	026-681-508-844-811;;005-043-758-297-20X;;039-605-596-627-725	US	0	A61B5/0024;;A61B5/0028;;A61B5/0031;;H04B13/005;;A61B5/0024;;A61B5/0022;;A61B5/0028;;A61B5/6833;;A61B5/7225;;A61B2562/046	A61B5/00		7	2	065-387-920-159-135;;045-581-824-306-24X	21728728;;pmc4156009;;10.1586/erd.11.16;;10.1145/3230543.3230566	Ferguson et al., “Wireless communication with implanted medical devices using the conductive properties of the body.” Expert Review of Medical Devices, vol. 8, 4, pp. 427-433, 2011, doi:10.1586/erd.11.16.;;Ma et al., “Enabling deep-tissue networking for miniature medical devices.” In Proceedings of the 2018 Conference of the ACM Special Interest Group on Data Communication (SIGCOMM '18). ACM, New…	ACTIVE	X
133	US	B2	US 11510582 B2	012-877-964-509-386	44894	2022	US 201916580409 A	43732	KR 20180154619 A	43438	Method for guiding measurement of biological signal in wearable device	An electronic device may include a display, a photoplethysmogram (PPG) sensor, a wireless communication circuit, a processor operatively connected to the display, the PPG sensor, and the wireless communication circuit, and a memory operatively connected to the processor. The electronic device implements the method, including monitoring blood glucose values of a user using the PPG sensor, displayi…	SAMSUNG ELECTRONICS CO LTD	KIM MINJI;;SEO HYEJUNG;;JE SEONGMIN	SAMSUNG ELECTRONICS CO. LTD (2019-09-02)	https://lens.org/012-877-964-509-386	Granted Patent	yes	41	0	9	124-437-877-525-937;;018-879-157-977-850;;145-842-303-173-849;;012-877-964-509-386;;191-763-723-717-454;;108-915-056-790-446;;062-350-163-044-841;;036-256-362-560-642;;131-570-499-852-426	CN;;EP;;KR;;US;;WO	9	124-437-877-525-937;;145-842-303-173-849;;018-879-157-977-850;;012-877-964-509-386;;191-763-723-717-454;;108-915-056-790-446;;062-350-163-044-841;;036-256-362-560-642;;131-570-499-852-426	CN;;EP;;KR;;US;;WO	0	A61B5/0205;;A61B5/14551;;A61B5/14542;;A61B5/14532;;A61B5/681;;A61B5/02416;;A61B5/02438;;A61B5/021;;A61B5/0004;;A61B2560/0238;;A61B2505/07;;A61B5/14532;;A61B5/42;;A61B5/4809;;A61B5/002;;A61B5/0022;;A61B5/7275;;A61B5/7282;;A61B5/681;;A61B2560/0223;;A61B5/0002;;A61B5/02416;;A61B5/742;;A61B5/4806;;A61B5/14532;;A61B5/7235;;A61B5/7275;;A61B5/7225;;A61B5/746;;A61B5/02427;;A61B5/14532;;A61B5/7465;;G06F1/…	A61B5/00;;A61B5/024;;A61B5/145;;G06F1/16		2	0			International Search Report dated Jan. 15, 2020.;;European Search Report dated Apr. 9, 2020.	ACTIVE	X
134	EP	B1	EP 2967415 B1	159-239-468-658-31X	45070	2023	EP 14710565 A	41715	US 201361802500 P;;US 201361802519 P;;EP 2014055304 W	41349	APPARATUS AND METHOD FOR ELECTRODERMAL ACTIVITY MEASUREMENT WITH CURRENT COMPENSATION		EMPATICA SRL	TOGNETTI SIMONE;;CENCI IVAN;;RESNATI DANIELE;;GARBARINO MAURIZIO;;LAI MATTEO	EMPATICA SRL (2016-12-21)	https://lens.org/159-239-468-658-31X	Granted Patent	yes	5	0	21	029-011-013-037-539;;015-569-186-248-11X;;132-963-466-709-053;;001-100-968-343-860;;044-667-861-542-867;;123-130-584-875-121;;077-450-659-174-415;;159-239-468-658-31X;;129-939-574-796-408;;046-005-579-827-551;;079-296-938-123-450;;106-825-933-579-991;;057-037-081-282-481;;129-368-208-459-501;;060-236-237-878-856;;154-369-527-056-073;;176-861-767-836-207;;012-325-155-942-846;;017-786-347-322-40X;;…	CN;;EP;;JP;;HK;;ES;;US;;CA;;WO	21	029-011-013-037-539;;015-569-186-248-11X;;132-963-466-709-053;;001-100-968-343-860;;044-667-861-542-867;;129-939-574-796-408;;077-450-659-174-415;;123-130-584-875-121;;159-239-468-658-31X;;046-005-579-827-551;;079-296-938-123-450;;106-825-933-579-991;;057-037-081-282-481;;129-368-208-459-501;;012-325-155-942-846;;176-861-767-836-207;;154-369-527-056-073;;060-236-237-878-856;;017-786-347-322-40X;;…	CN;;EP;;JP;;HK;;ES;;US;;CA;;WO	0	A61B5/0205;;A61B5/02405;;A61B5/02438;;A61B5/0531;;A61B5/0533;;A61B5/681;;A61B2562/0219;;A61B2562/0215;;A61B5/0205;;A61B5/02405;;A61B5/0533;;A61B2562/0219;;A61B5/0531;;A61B5/681;;A61B5/02438;;A61B2562/0215;;A61B5/053;;A61B5/6802	A61B5/053;;A61B5/00;;A61B5/0205;;A61B5/024		0	0				ACTIVE	X
136	US	B2	US 10092225 B2	101-710-054-744-549	43382	2018	US 201615043454 A	42412	US 201615043454 A	42412	Non-invasive system and method for measuring blood glucose in the human body utilizing a modified ceramic coaxial resonator	A system and method for measuring glucose levels in a user's blood without having to draw a blood sample. A wave energy source emits wave energy. A modified ceramic coaxial resonator is provided that receives the wave energy and produces a frequency oscillation. An opening is formed in a conductive layer surrounding the ceramic coaxial resonator. Skin tissue is pressed against the opening. The sa…	BHARJ SARIJIT S	BHARJ SARIJIT S		https://lens.org/101-710-054-744-549	Granted Patent	yes	5	2	2	144-105-160-863-191;;101-710-054-744-549	US	2	144-105-160-863-191;;101-710-054-744-549	US	0	A61B5/14532;;A61B5/0507;;A61B5/6826;;A61M5/14244;;A61M5/1723;;A61M2005/1726;;A61B5/14532;;A61B5/0507;;A61B5/6826;;A61B5/742;;A61M5/14244;;A61M5/1723;;A61M2005/1726	A61B5/145;;A61B5/00;;A61M5/142;;A61M5/172		0	0				ACTIVE	X
140	US	B2	US 10448831 B2	019-085-329-937-823	43760	2019	US 201815921971 A	43174	US 201815921971 A;;US 201762479448 P	42825	Wearable sensor	A wearable health sensor and methods of operating the same are herein described, the wearable health sensor and methods of operation having a variety of clinical and non-clinical uses.	MCCALMONT STEPHEN A;;MACEACHERN STUART P;;BECK RALPH L;;BRAVEHEART WIRELESS INC	MCCALMONT STEPHEN A;;MACEACHERN STUART P;;BECK RALPH L	BRAVEHEART WIRELESS INC (2018-03-14)	https://lens.org/019-085-329-937-823	Granted Patent	yes	10	0	2	019-085-329-937-823;;130-278-696-943-752	US	2	019-085-329-937-823;;130-278-696-943-752	US	0	A61B5/0022;;A61B5/0024;;A61B5/352;;G16H10/60;;G16H40/63;;A61B5/0022;;A61B5/0024;;A61B5/02055;;A61B5/02405;;A61B5/0533;;A61B5/0816;;A61B5/1116;;A61B5/1118;;A61B5/14532;;A61B5/14542;;A61B5/352;;A61B5/7214;;A61B5/747;;A61B2560/0214;;G16H10/60;;G16H40/63;;H04B1/00	A61B5/00;;A61B5/0205;;A61B5/024;;A61B5/08;;A61B5/11;;A61B5/145;;A61B5/352;;G16H10/60;;G16H40/63;;H04B1/00		0	0				ACTIVE	X
141	US	B1	US 12029553 B1	114-068-556-980-492	45482	2024	US 202016930837 A	44028	US 202016930837 A;;US 201816224887 A;;US 201815964227 A;;US 201762490970 P	42852	Electrically-isolated and moisture-resistant designs for wearable devices	An example continuous glucose monitor includes a printed circuit board (“PCB”) having first and second outer layers and an inner layer; a semiconductor package having a plurality of pins coupled to the first outer layer of the PCB; an electrical contact formed on the second outer layer of the PCB; a trace having a first portion disposed on the first outer layer, a second portion disposed on the i…	VERILY LIFE SCIENCES LLC;;DEXCOM INC	PHILIPPINE MANDY;;MATULA SCOTT;;VANDERHAEGEN JOHAN;;JUNG LOUIS;;ARUMUGAM NIVI	DEXCOM INC (2020-03-05);;VERILY LIFE SCIENCES LLC (2018-04-29)	https://lens.org/114-068-556-980-492	Granted Patent	yes	33	0	4	089-887-700-379-015;;165-266-053-447-618;;114-068-556-980-492;;101-662-324-450-679	US	4	101-662-324-450-679;;089-887-700-379-015;;114-068-556-980-492;;165-266-053-447-618	US	0	A61B5/14865;;A61B2562/166;;A61B5/14532;;A61B5/6801;;A61B5/14532;;A61B5/6801;;A61B5/157;;A61B5/1486;;A61B5/14865;;A61B2562/166;;H05K3/284	A61B5/00;;A61B5/01;;A61B5/021;;A61B5/022;;A61B5/024;;A61B5/145;;A61B5/1486;;A61B5/157;;A61B5/24;;A61B5/30;;H01L21/44;;H01L23/34;;H01L23/36;;H01L23/48;;H05K3/28		5	0			“Chapter 12: Printed Circuit Board (PCB) Design Issues”, Analog Devices (2012), Available online at : : http://www.analog.com/library/ analogdialogue/ archives/43-09/edch%2012%20pc%20issues.pdf, 2012, 97 pages.;;U.S. Appl. No. 15/964,227 , “Notice of Allowance”, Sep. 26, 2018, 11 pages.;;U.S. Appl. No. 16/224,887 , “Final Office Action”, Feb. 7, 2020, 13 pages.;;U.S. Appl. No. 16/224,887 , “Non-F…	ACTIVE	X
142	US	B2	US 10238289 B2	026-747-472-536-495	43550	2019	US 201314035022 A	41541	JP 2011068627 A;;JP 2011006947 W	40627	Body fluid component measuring system	A body fluid component measuring system which is capable of continuous measurement and reduces downtime includes a sensor unit which is positionable indwelling in the skin of a subject and which measures a predetermined body fluid component included in the body fluid of the subject; and a transmission unit which is detachably attached to the sensor unit and which calculates blood glucose level ba…	TERUMO CORP	HAGI KOUJI	TERUMO KABUSHIKI KAISHA (2013-09-20)	https://lens.org/026-747-472-536-495	Granted Patent	yes	17	18	5	045-171-191-985-999;;088-328-106-798-893;;183-499-652-487-697;;026-747-472-536-495;;165-452-991-649-282	JP;;US;;WO	5	088-328-106-798-893;;045-171-191-985-999;;183-499-652-487-697;;026-747-472-536-495;;165-452-991-649-282	JP;;US;;WO	0	A61B5/14532;;A61B5/0002;;A61B5/14503;;A61B5/1459;;A61B5/6833;;A61B5/6848;;A61B2560/0412;;A61B5/0004;;A61B5/0002;;A61B5/14503;;A61B5/14532;;A61B5/1459;;A61B5/6833;;A61B5/6848;;A61B5/7405;;A61B5/742;;A61B2560/0412	A61B5/1459;;A61B5/00;;A61B5/145		1	0			International Search Report (PCT/ISA/210) dated Feb. 28, 2012, by the Japanese Patent Office as the International Searching Authority for International Application No. PCT/JP2011/006947.	ACTIVE	X
143	US	B2	US 9713447 B2	018-823-998-199-878	42941	2017	US 8439209 A	39847	CH 2005000666 W	38666	Device for determining the glucose level in body tissue	The apparatus for the non-invasive glucose detection comprises an electrical detection device (2) for measuring the response of the tissue or blood to an electric field at low frequencies below 1 MHz and at high frequencies above 10 MHz. The former is primarily dominated by skin hydration and sweat, while the latter contains contributions from the current glucose level. Combining the two signals …	CADUFF ANDREAS;;TALARY MARK STUART;;DEWARRAT FRANCOIS;;HUBER DANIEL;;STALDER GIANLUCA;;BIOVOTION AG	CADUFF ANDREAS;;TALARY MARK STUART;;DEWARRAT FRANCOIS;;HUBER DANIEL;;STALDER GIANLUCA	BIOFOURMIS AG (2019-11-29);;SOLIANIS HOLDING AG (2008-07-19);;ACTIGRAPH L.L.C (2024-12-31);;BIOSIGNS PTE LTD (2020-02-04);;BIOVOTION AG (2012-01-27)	https://lens.org/018-823-998-199-878	Granted Patent	yes	88	14	9	052-189-515-748-084;;001-470-008-995-392;;088-652-559-845-861;;137-061-274-461-822;;122-416-225-355-519;;028-605-118-490-956;;065-597-688-055-379;;018-823-998-199-878;;185-198-461-645-051	EP;;JP;;US;;WO	9	052-189-515-748-084;;088-652-559-845-861;;001-470-008-995-392;;137-061-274-461-822;;122-416-225-355-519;;028-605-118-490-956;;065-597-688-055-379;;018-823-998-199-878;;185-198-461-645-051	EP;;JP;;US;;WO	0	A61B5/0261;;A61B5/0531;;A61B5/11;;A61B5/14532;;A61B5/721;;A61B2560/0242;;A61B2562/0219;;A61B2562/0247;;A61B5/6843;;A61B5/0261;;A61B5/0531;;A61B5/11;;A61B5/14532;;A61B5/721;;A61B2560/0242;;A61B2562/0219;;A61B2562/0247;;A61B5/6843	A61B5/00;;A61B5/026;;A61B5/11;;A61B5/145;;A61B5/296		23	10	140-526-450-450-715;;015-863-210-892-800;;044-179-057-363-144;;092-125-390-268-009;;032-928-990-399-531;;060-097-944-243-035;;116-257-115-412-25X;;069-676-374-842-231;;026-058-282-435-489;;085-774-509-911-126	15007452;;10.1039/b308888j;;10.1039/b400663a;;15269807;;10.1039/b103933b;;15100895;;10.1039/b313761a;;15159786;;10.1016/s0263-2241(98)00054-2;;10.1089/dia.2004.6.660;;15628820;;10.2337/diabetes.51.11.3263;;12401718;;10.1007/bf00776148;;10.1109/tim.2002.808013;;10.1016/s0956-5663(03)00196-9;;14611756	M. Brischwein et al, “Functional cellual assays with multiparametric silicon sensor chips” Lab Chip, 2003, 3, 234-240.;;Z. Wang et al, “Measurements of scattered light on a microchip flow cytometer with integrated polymer based optical elements” Lab Chip, 2004, 4, 372-377.;;S. Gawad et al; “Micromachined impedance spectroscopy flow cytometer for cell analysis and particle sizing” Lab on a Chip, 2…	ACTIVE	X
144	US	B2	US 11000233 B2	109-365-258-977-148	44327	2021	US 201715412916 A	42758	EP 14178704 A;;EP 2015067222 W	41848	Medical sensor assembly	A medical sensor assembly comprises a flexible plaster adapted for adhesion on the skin of a patient and a sensor configured for transdermal measuring a physiological parameter, wherein the sensor has a measuring part insertable into the skin and a contact part for providing a signal connection to a measuring unit. It is proposed that the plaster has a flap which is adhered to an intermediate sec…	ROCHE DIABETES CARE INC	FREY STEPHAN-MICHAEL;;KUBE OLIVER;;WALTER HELMUT	ROCHE DIABETES CARE GMBH (2017-04-11);;ROCHE DIABETES CARE INC (2017-04-12)	https://lens.org/109-365-258-977-148	Granted Patent	yes	24	0	17	068-746-741-037-950;;138-695-886-788-114;;034-615-855-337-990;;035-076-106-338-474;;109-365-258-977-148;;160-257-154-586-514;;169-620-046-328-017;;043-821-331-546-306;;073-683-849-436-086;;026-530-842-425-710;;004-253-829-866-262;;144-492-415-823-048;;075-949-280-330-946;;029-886-537-162-121;;164-791-776-116-934;;133-138-532-218-305;;063-931-752-377-195	CN;;DK;;EP;;SI;;PL;;ES;;RU;;US;;CA;;WO	17	068-746-741-037-950;;138-695-886-788-114;;034-615-855-337-990;;035-076-106-338-474;;109-365-258-977-148;;160-257-154-586-514;;169-620-046-328-017;;043-821-331-546-306;;073-683-849-436-086;;026-530-842-425-710;;004-253-829-866-262;;144-492-415-823-048;;075-949-280-330-946;;029-886-537-162-121;;164-791-776-116-934;;133-138-532-218-305;;063-931-752-377-195	CN;;DK;;EP;;SI;;PL;;ES;;RU;;US;;CA;;WO	0	A61B5/14865;;A61B5/6833;;A61B5/6849;;A61B5/6833;;A61B5/14865;;A61M25/02;;A61M2025/0246;;A61M2025/0266;;A61M2025/028;;A61B5/6849;;A61B5/14532;;A61B5/1473;;A61B5/14865;;A61B5/6833;;A61M25/02;;A61B5/6833;;A61B5/14865;;A61M25/02;;A61M2025/0266;;A61M2025/028;;A61M2025/0246;;A61B5/6849;;A61B5/14532;;A61B5/1473;;A61B5/6832	A61B5/145;;A61B5/00;;A61B5/1473;;A61B5/1486;;A61M25/02		2	1	079-950-953-213-343	10.1016/s0004-9514(14)60637-1;;25026315	EPO machine translation of DE3924599. Retrieved on Jul. 29, 2019. (Year: 2019).;;Drew, J. H., Padoms, K., & Clabburn, S. L. (1986). Endotracheal Tube Management in Newborn Infants with Hyaline Membrane Disease. Australian Journal of Physiotherapy, 32(1), 3-5. doi: 10.1016/s0004-9514(14)60637-1 (Year: 1986).	ACTIVE	X
146	US	B2	US 11185261 B2	004-057-901-219-249	44530	2021	US 201916262836 A	43495	US 201916262836 A;;US 201862623771 P	43130	System and method for non-invasive blood glucose monitoring	A system and method for continuous glucose monitoring (CGM) of blood in a blood vessel of a patient using a non-invasive sensor composed of a patch antenna operating in the Industrial, Scientific and Medical (ISM) Radio band (5.725 GHz-5.875 GHz). The device determines the blood glucose concentration of the blood in the blood vessel based on the measured shift of the resonant frequency of the non…	UNIV SOUTH FLORIDA	SADDOW STEPHEN E;;CESPEDES FABIOLA ARAUJO;;MUMCU GOKHAN;;FREWIN CHRISTOPHER LEROY	UNIVERSITY OF SOUTH FLORIDA (2019-02-13)	https://lens.org/004-057-901-219-249	Granted Patent	yes	5	3	2	026-321-389-637-545;;004-057-901-219-249	US	2	026-321-389-637-545;;004-057-901-219-249	US	0	A61B5/14532;;A61B5/0507;;A61B5/6833;;H01Q1/273;;H01Q9/0407;;A61B5/14532;;A61B5/0507;;A61B5/6813;;A61B5/742;;H01Q1/273;;H01Q9/0407	A61B5/145;;A61B5/00;;A61B5/0507;;H01Q1/27;;H01Q9/04		6	5	036-396-194-161-339;;005-529-256-342-891;;043-871-347-330-601;;062-966-830-026-774;;035-765-780-481-276	10.1109/icsens.2013.6688379;;22254961;;10.1109/iembs.2011.6090582;;10.1109/ner.2013.6696021;;24593110;;10.7748/ns2014.03.28.27.52.e650;;23166457;;pmc3500977;;10.2147/mder.s28134	Afroz, S. et al., Implantable SiC based RF antenna biosensor for continuous glucose monitoring, IEEE Sensors, Baltimore, Maryland USA, 2013.;;Afroz, S., A Biocompatible SiC RF Antenna for In-vivo Sensing Applications, Electrical Engineering, University of South Florida, 2013.;;Frewin, C. L. et al., Single-Crystal Cubic Silicon Carbide: An in vivo biocompatible semiconductor for brain machine inte…	ACTIVE	X
147	US	B2	US 11724130 B2	055-534-243-419-802	45153	2023	US 201414900000 A	41814	US 201414900000 A;;US 201361838773 P;;US 201361838811 P;;US 2014/0043953 W	41449	Wearable ultrasound device	A wearable ultrasound device and method of using the device includes a power controller with a power source and at least one integrated circuit that delivers electrical power to an applicator. The applicator is electrically coupled to the power controller and a surface of the applicator transmits ultrasound to a wearer for a given duration. The applicator includes radio frequency (RF) drive elect…	ZETROZ INC;;ZETROZ SYSTEMS LLC	LEWIS JR GEORGE K;;GUFFEY BRYANT;;GUARINO JOANNE;;FLESHMAN SHANE;;LANGER MATTHEW	ZETROZ INC (2014-03-26);;ZETROZ SYSTEMS LLC (2016-01-29)	https://lens.org/055-534-243-419-802	Granted Patent	yes	15	5	7	064-315-980-229-511;;001-452-836-395-983;;055-534-243-419-802;;065-841-750-165-838;;140-353-058-146-396;;115-648-275-419-33X;;067-634-676-483-627	EP;;ES;;US;;WO	7	001-452-836-395-983;;064-315-980-229-511;;055-534-243-419-802;;065-841-750-165-838;;115-648-275-419-33X;;067-634-676-483-627;;140-353-058-146-396	EP;;ES;;US;;WO	0	A61N7/00;;A61B2017/00106;;A61B2017/2253;;A61B2018/00791;;A61H23/0245;;A61H2201/0176;;A61H2201/0184;;A61H2201/5015;;A61H2201/5043;;A61H2201/5058;;A61H2201/5097;;A61H2230/207;;A61H2230/25;;A61H2230/505;;A61N2007/006;;A61N2007/0073;;A61N2007/0078;;A61N7/00;;A61B2017/00106;;A61B2017/2253;;A61B2018/00791;;A61H23/0245;;A61H2201/0176;;A61H2201/0184;;A61H2201/5015;;A61H2201/5043;;A61H2201/5058;;A61H2201/…	A61N7/00;;A61B17/00;;A61B17/225;;A61B18/00;;A61H23/02		2	0			European Patent Office, Supplementary European Search Report, issued in European Patent Application No. 14818371, dated Jan. 26, 2017.;;ISA/KR International Search Report, issued in PCT/US2014/043953, dated Oct. 14, 2014.	ACTIVE	X
150	US	B2	US 10154805 B2	053-394-579-874-660	43452	2018	US 201715725562 A	43013	US 201715725562 A;;US 201662407670 P	42656	Disposable glucose biosensor including an activity sensor	Example disposable biosensor devices having an activity sensor are disclosed. One example device includes a disposable biosensor that has a first electrode having a distal end to be inserted into a subcutaneous layer beneath a person's skin, the first electrode having a reactive material disposed on the distal end, and a second electrode. The disposable biosensor device also includes an activity …	VERILY LIFE SCIENCES LLC	BIEDERMAN WILLIAM;;DRUMOND MIGUEL	DEXCOM INC (2020-03-05);;VERILY LIFE SCIENCES LLC (2017-10-04)	https://lens.org/053-394-579-874-660	Granted Patent	yes	14	0	6	021-072-656-245-620;;176-375-962-577-227;;182-411-730-181-859;;088-427-532-340-993;;199-531-336-064-930;;053-394-579-874-660	CN;;EP;;US;;WO	6	021-072-656-245-620;;053-394-579-874-660;;088-427-532-340-993;;182-411-730-181-859;;199-531-336-064-930;;176-375-962-577-227	CN;;EP;;US;;WO	0	A61B5/14532;;A61B5/01;;A61B5/02;;A61B5/1118;;A61B5/1451;;A61B2562/0219;;C12Q1/006;;G16H40/63;;G16Z99/00;;A61B5/14532;;A61B5/0002;;A61B5/01;;A61B5/02;;A61B5/1118;;A61B5/14514;;A61B2562/0219;;A61M2205/3592;;C12Q1/001;;C12Q1/006;;G01N27/3275;;G16H40/63;;G16Z99/00;;H04L7/0079	G01N27/327;;A61B5/00;;A61B5/145;;C12Q1/00;;G16Z99/00;;H04L7/00		1	0			International Application No. PCT/US2017/055784 , “International Search Report and Written Opinion”, Feb. 28, 2018, 7 pages.	ACTIVE	X
152	US	B2	US 9955911 B2	117-404-769-312-622	43221	2018	US 201715406550 A	42748	US 201715406550 A;;US 201615181082 A;;US 201314082102 A;;US 201314080717 A;;US 201314080725 A;;US 201361882403 P	41542	Electrocardiography and respiratory monitor recorder	An electrocardiography and respiratory monitor recorder is provided. The recorder includes a sealed housing adapted to be removably secured into a non-conductive receptacle on a disposable extended wear electrode patch and an electronic circuitry comprised within the sealed housing. The electronic circuitry includes an electrocardiographic front end circuit electrically interfaced to an externall…	BARDY DIAGNOSTICS INC;;BARDY DIAGNOSTICS INC	BARDY GUST H;;BISHAY JON MIKALSON;;FELIX JASON		https://lens.org/117-404-769-312-622	Granted Patent	yes	410	52	12	193-431-620-445-267;;055-193-098-065-709;;199-522-216-927-688;;077-133-749-932-428;;085-881-041-016-866;;045-042-910-508-793;;188-591-111-867-949;;064-121-500-369-676;;117-404-769-312-622;;003-035-004-238-497;;161-965-275-425-913;;196-225-953-614-702	US	313	162-172-523-420-270;;011-929-815-322-759;;104-882-794-993-161;;008-576-091-821-747;;176-888-667-828-322;;189-270-741-421-481;;083-038-788-448-323;;021-590-609-171-200;;049-646-241-442-08X;;096-977-936-983-107;;005-071-129-429-386;;009-973-446-893-789;;072-214-406-977-184;;164-813-481-434-286;;077-133-749-932-428;;085-881-041-016-866;;198-651-301-044-868;;072-900-300-732-314;;107-579-690-824-096;;…	EP;;HK;;JP;;US;;CA;;WO	0	A61B5/4818;;A61B5/0006;;A61B5/0022;;A61B5/02055;;A61B5/03;;A61B5/087;;A61B5/1118;;A61B5/14532;;A61B5/14551;;A61B5/259;;A61B5/282;;A61B5/335;;A61B5/7282;;G16H40/67;;A61B5/4818;;A61B5/0006;;A61B5/0022;;A61B5/02055;;A61B5/021;;A61B5/03;;A61B5/0816;;A61B5/087;;A61B5/1118;;A61B5/14532;;A61B5/14551;;A61B5/14552;;A61B5/28;;A61B5/282;;A61B5/335;;A61B5/6832;;A61B5/7282;;A61B7/003;;G16H40/67	A61B5/00;;A61B5/0205;;A61B5/021;;A61B5/0408;;A61B5/08;;A61B5/087;;A61B5/11;;A61B5/145;;A61B5/1455;;A61B7/00		34	12	030-428-072-726-122;;025-946-988-506-778;;026-130-942-686-659;;015-857-010-298-849;;059-575-959-794-874;;114-783-948-722-866;;032-017-593-851-03X;;139-128-374-833-167;;025-919-670-407-178;;094-637-167-702-329;;006-542-033-030-340;;064-754-301-990-101	10.1145/2221924.2221960;;10.1016/j.jacc.2008.02.032;;18498951;;10.1016/j.jacc.2007.01.024;;17349896;;18557568;;10.12968/bjcn.2008.13.3.28676;;23220686;;10.1016/j.hrthm.2012.12.001;;pmc3698570;;10530830;;10.1016/s1386-5056(99)00027-1;;10.1109/embc.2013.6610948;;24111135;;10.5220/0004640900150021;;18289975;;10.1109/83.366473;;10.1109/indcon.2011.6139329;;10.1109/10.245608;;8288278;;10.1111/j.1399-5…	US 6,527,714, 03/2003, Bardy (withdrawn);;BIOPAC Systems, Inc. #AS148—Automated ECG Analysis , Mar. 24, 2006.;;https://web.archive.org/web/20130831204020/http://www.biopac.com/research.asp?CatID=37&Main=Software (Aug. 2013).;;Adinstruments:ECG Analysis Module for LabChart & PowerLab, 2008.;;15 of the Hottest Wearable Gadgets, URL <http://thehottestgadgets.com/2008/09/the-15-hottest-wearable-gadge…	ACTIVE	X
153	US	B2	US 10725652 B2	000-608-049-992-764	44040	2020	US 201615391366 A	42731	US 201615391366 A;;US 201562271843 P	42366	Wearable apparatus for continuous blood glucose monitoring	A system, a method, and a computer program product for providing wearable continuous blood glucose monitoring. In some embodiments, there is provided a method that includes receiving, at a smartwatch, an alert representative of a glucose state of a host-patient coupled to a glucose sensor; detecting, at the smartwatch, a predetermined action indicative of a request to generate a glance view provi…	DEXCOM INC	BHAVARAJU NARESH C;;COHEN ERIC;;GARCIA ARTURO;;KOEHLER KATHERINE YERRE;;MENSINGER MICHAEL ROBERT;;REIHMAN ELI;;SMITH BRIAN CHRISTOPHER;;HEDLUND PETER;;CABRERA JR ESTEBAN	DEXCOM INC (2017-02-07)	https://lens.org/000-608-049-992-764	Granted Patent	yes	35	4	17	125-658-619-470-369;;120-668-327-495-49X;;118-583-559-339-766;;098-005-206-993-190;;005-424-583-730-495;;109-804-023-445-202;;117-875-701-863-947;;000-608-049-992-764;;156-172-227-779-564;;179-036-945-121-730;;042-130-591-256-39X;;032-844-447-376-524;;128-163-082-533-28X;;022-976-817-643-784;;055-230-001-978-748;;139-998-677-305-635;;075-982-249-799-10X	EP;;US;;AU;;CA;;WO	17	125-658-619-470-369;;120-668-327-495-49X;;118-583-559-339-766;;098-005-206-993-190;;005-424-583-730-495;;109-804-023-445-202;;117-875-701-863-947;;000-608-049-992-764;;156-172-227-779-564;;179-036-945-121-730;;042-130-591-256-39X;;032-844-447-376-524;;128-163-082-533-28X;;022-976-817-643-784;;055-230-001-978-748;;139-998-677-305-635;;075-982-249-799-10X	EP;;US;;AU;;CA;;WO	0	A61B5/0022;;A61B2560/0295;;G08B21/043;;H04W4/80;;A61B5/6898;;A61B5/742;;A61B5/0004;;A61B5/14503;;A61B5/486;;G06F1/163;;G06F1/1684;;G06F3/04883;;G08B21/0453;;A61B5/14532;;A61B5/681;;A61B5/7275;;A61B5/7405;;A61B5/7455;;A61B5/746;;A61B5/7475;;G16H40/67;;G06F3/04883;;G08B21/0453;;A61B5/0024;;A61B5/14532;;A61B5/681;;A61B5/7275;;A61B5/7405;;A61B5/7435;;A61B5/7445;;A61B5/7455;;A61B5/746;;A61B5/7475;;A61…	A61B5/00;;A61B5/145;;G06F1/16;;G06F3/0488;;G08B21/04;;H04W4/80		0	0				ACTIVE	X
154	US	B2	US 12069437 B2	109-449-819-496-730	45524	2024	US 202017621580 A	44007	US 202017621580 A;;US 201962868071 P;;US 2020/0039677 W	43644	Direct informative communication through an ear-wearable device	A method and system are described for providing high-priority notification messages to a user of an ear-wearable device system. The ear-wearable device system includes a physiological sensor present on, within, or carried with the user and an ear-wearable device comprising a speaker, a microphone, a processor, a memory storage, and a wireless communication device. The system is capable of receivi…	STARKEY LABS INC	STAPF MICHAEL D;;JASNOCH COLLIN STEVEN	STARKEY LABORATORIES INC (2023-04-10)	https://lens.org/109-449-819-496-730	Granted Patent	yes	27	1	6	066-066-850-845-947;;126-466-161-919-653;;109-449-819-496-730;;071-332-526-757-347;;112-267-688-641-360;;174-635-874-812-384	EP;;US;;WO	6	174-635-874-812-384;;126-466-161-919-653;;071-332-526-757-347;;112-267-688-641-360;;109-449-819-496-730;;066-066-850-845-947	EP;;US;;WO	0	H04R25/55;;H04R2225/55;;A61B5/741;;A61B5/14532;;A61B5/0205;;A61B5/0022;;H04M1/72412;;H04M1/72454;;A61B5/0026;;A61B5/746;;H04R25/554;;H04R2225/55	H04R25/00;;A61B5/00		2	0			“International Preliminary Report on Patentability,” for PCT Application No. PCT/US2020/039677 mailed Jan. 6, 2022 (8 pages).;;“International Search Report and Written Opinion,” for PCT Application No. PCT/US2020/039677 mailed Sep. 16, 2020 (12 pages).	ACTIVE	X
155	US	B2	US 11547356 B2	132-623-387-351-021	44936	2023	US 202016887959 A	43980	US 202016887959 A;;US 201962856465 P	43619	Wearable device for healthcare and method thereof	A wearable device for healthcare and a method thereof, wherein the device is worn on a finger for measuring the health data of the user, including but not limited to, the heart rate, blood oxygen saturation, etc. The wearing size of the device is adjustable for different sizes of fingers. In one embodiment, the device includes a main body at least partially worn on a digit of a user; at least one…	BELUN TECH IP COMPANY LIMITED	KWOK KA CHEUNG;;FUNG WANG KIN;;NG LUIS;;SZE NGOK MAN;;TO KWAN WAI	BELUN TECHNOLOGY (IP) COMPANY LTD (2020-05-28)	https://lens.org/132-623-387-351-021	Granted Patent	yes	3	1	11	178-942-352-571-582;;137-569-207-096-527;;020-074-743-112-044;;052-064-560-489-836;;132-623-387-351-021;;095-602-422-001-703;;072-900-683-010-019;;133-076-754-414-191;;133-832-753-138-886;;198-448-366-322-167;;109-963-283-841-410	CN;;EP;;TW;;JP;;US;;WO	11	178-942-352-571-582;;137-569-207-096-527;;020-074-743-112-044;;052-064-560-489-836;;132-623-387-351-021;;095-602-422-001-703;;072-900-683-010-019;;133-076-754-414-191;;133-832-753-138-886;;198-448-366-322-167;;109-963-283-841-410	CN;;EP;;TW;;JP;;US;;WO	0	A61B5/6826;;A61B5/14551;;A61B5/02438;;A61B5/002;;A61B5/4815;;A61B5/7264;;A61B5/6826;;A61B5/6838;;A61B2562/0238;;A61B5/14551;;A61B5/4806;;A61B5/1455	A61B5/1455;;A61B5/00		0	0				ACTIVE	X
156	US	B2	US 11883134 B2	176-768-139-168-985	45321	2024	US 202017127791 A	44183	US 202017127791 A	44183	System for monitoring a physiological parameter in a person that involves coherently combining data generated from an RF-based sensor system	Embodiments of the present technology may include a system for monitoring a physiological parameter in a person, the system including a frequency synthesizer configured to generate radio waves across a range of radio frequencies. Embodiments may also include at least one transmit antenna configured to transmit the radio waves below the skin surface of a person. Embodiments may also include a two-…	MOVANO INC	LEABMAN MICHAEL A	MOVANO INC (2020-12-17)	https://lens.org/176-768-139-168-985	Granted Patent	yes	91	3	2	176-768-139-168-985;;162-793-369-351-183	US	21	036-199-540-572-251;;010-191-199-313-490;;162-793-369-351-183;;127-517-883-319-514;;155-619-630-396-258;;068-278-521-521-519;;141-474-550-031-539;;176-768-139-168-985;;188-774-406-162-50X;;008-696-199-389-26X;;110-511-808-756-277;;044-013-477-299-601;;151-317-688-264-312;;115-125-004-012-228;;187-448-668-379-258;;108-217-263-305-791;;061-432-756-546-663;;176-448-829-095-434;;066-647-216-020-556;;…	EP;;US;;WO	0	H01Q1/273;;A61B5/0205;;A61B5/02108;;A61B5/14532;;A61B5/681;;A61B2560/0209;;A61B2560/0214;;H01Q1/2283;;H01Q21/28;;A61B5/0205;;A61B5/02108;;A61B5/05;;A61B5/14532;;A61B5/681;;A61B2560/0209;;A61B2560/0214;;H01Q1/273;;H01Q5/307;;H01Q21/061	A61B5/0205;;A61B5/00;;A61B5/021;;A61B5/05;;A61B5/145;;H01Q1/27;;H01Q5/307;;H01Q21/06		46	28	003-997-746-479-107;;016-813-088-091-348;;015-863-144-193-031;;020-761-321-454-137;;084-897-621-690-830;;030-642-885-975-465;;012-759-055-427-140;;041-481-795-211-108;;018-158-077-402-985;;112-672-561-456-722;;081-194-784-011-943;;054-532-151-256-588;;005-747-446-184-535;;028-556-024-970-977;;064-340-573-720-551;;085-358-523-417-21X;;070-899-542-503-487;;052-313-483-258-595;;073-873-924-460-877;;…	10.3390/s17081866;;28805693;;pmc5579887;;10.1007/s10762-018-0502-6;;10.1088/1742-6596/588/1/012046;;pmc6412701;;30781431;;10.3390/s19040800;;10.1007/978-1-4419-6775-6_6;;10.1145/2897824.2925953;;10.1109/jssc.2016.2585621;;10.3390/rs12030385;;pmc5537249;;28761121;;10.1038/s41598-017-06926-1;;10.1109/irmmw-thz.2014.6956294;;10.1109/access.2019.2904493;;10.3390/diagnostics9010006;;pmc6468903;;306261…	Shay, Oliver, “Arterial Pulse Measurement with a Contactless Radar Sensor”, (2019), 1 pg.;;American Diabetes Association, “Economic Costs of Diabetes in the U.S. in 2017”, https://doi.org/10.2337/dci18-0007, Mar. 22, 2018, 12 pgs.;;Bruen, Danielle et al. “Glucose Sensing for Diabetes Monitoring: Recent Developments”, Sensors 2017, 21 pgs.;;Cano-Garcia, Helena et al. “Millimeter-Wave Sensing of Di…	ACTIVE	X
158	US	B2	US 9913601 B2	012-436-138-927-064	43172	2018	US 201313758511 A	41309	US 201313758511 A;;US 201261594752 P	40942	Method and apparatus for monitoring a blood oxygen saturation level relative to a saturation threshold value	A method and apparatus for monitoring a blood oxygen saturation level within a subject's tissue is provided. The method includes the steps of: a) sensing the subject's tissue using a near infrared spectrophotometric oximeter, and producing a value representative of the oxygen saturation level within the sensed tissue; b) comparing the determined saturation value to a predetermined threshold oxyge…	CAS MEDICAL SYSTEMS INC	BENNI PAUL B	EDWARDS LIFESCIENCES CORPORATION (2019-09-23);;CAS MEDICAL SYSTEMS INC (2017-12-08)	https://lens.org/012-436-138-927-064	Granted Patent	yes	14	7	2	065-117-359-282-081;;012-436-138-927-064	US	2	065-117-359-282-081;;012-436-138-927-064	US	0	A61B5/7282;;A61B5/14553;;A61B5/7275;;A61B5/743;;A61B5/746;;G16H40/63;;G16H50/30;;G16H50/70;;A61B5/14551;;A61B5/14553;;A61B5/7275;;A61B5/7282;;A61B5/743;;A61B5/746;;G16H40/63;;G16H50/30;;G16H50/70	A61B5/1455;;A61B5/00		1	1	001-461-454-232-710	10.1016/j.jtcvs.2010.05.017;;20579669	Fischer et al. “Noninvasive Cerebral Oxygenation May Predict Outcome in Patients Undergoing Aortic Arch Surgery”, Journal of Thoracic and Cardiovascular Surgery, vol. 141, No. 3, Jun. 25, 2010.	ACTIVE	X
159	US	B2	US 11076805 B2	099-397-312-157-198	44411	2021	US 201916371930 A	43556	US 201916371930 A;;US 201715856504 A	43097	Wearable diagnostic device	A wearable diagnostic device worn on a user's body that can provide various types of health-related information to the user is described. The wearable diagnostic device can provide real-time, non-invasive, accurate, and continuous data regarding a user's heart rate, hemoglobin level, body temperature, oxygen level, glucose level, and blood pressure. In some implementations, the wearable diagnosti…	SAYANI SALEEM	SAYANI SALEEM;;MUQEET MUHAMMAD ABDUL;;AHMED HAFIZ IMTIAZ	SALEEM SAYANI (2017-12-28)	https://lens.org/099-397-312-157-198	Granted Patent	yes	19	2	3	088-991-863-532-989;;099-397-312-157-198;;094-182-328-846-887	US	3	088-991-863-532-989;;099-397-312-157-198;;094-182-328-846-887	US	0	A61B5/681;;A61B5/0006;;A61B5/0008;;A61B5/0205;;A61B5/021;;A61B5/02438;;A61B5/1101;;A61B5/14532;;A61B5/318;;A61B5/681;;A61B5/0006;;A61B5/0008;;A61B5/0024;;A61B5/0205;;A61B5/021;;A61B5/02438;;A61B5/11;;A61B5/1101;;A61B5/14532;;A61B5/318;;A61B5/742	A61B5/00;;A61B5/0205;;A61B5/021;;A61B5/024;;A61B5/11;;A61B5/145;;A61B5/318		2	1	148-783-649-047-753	10.4093/dmj.2015.39.5.353;;pmc4641964;;26566492	“Parhofer, Klaus G., Interaction between Glucose and Lipid Metabolism: More than Diabetic Dyslipidemia, 2015, Diabetes and Metabolism Journal, 39, pp. 353-362” (Year: 2015).;;PCT International Preliminary Report on Patentability in International Appln. No. PCT/US2017/068692, dated Jun. 30, 2020, 8 pages.	ACTIVE	X
160	US	B2	US 10321879 B2	099-456-855-908-848	43634	2019	US 201615134553 A	42481	US 201615134553 A;;US 201562151152 P	42116	Multiple sensor wireless wearable pulse oximeter-based device	A multiple sensor wireless wearable device measuring oxygen saturation and/or heart rate includes a single housing, two or more sensors, each having a pick up beam, an alarm generator, and a timer generator. The two or more sensors, the alarm generator, and the timer generator are all housed inside the single housing, and the two or more sensors are placed in specifically selected placements that…	DELIA DIEGO ALEJANDRO	DELIA DIEGO ALEJANDRO	APN INTELECTUAL PROPERTY LLC (2018-09-11)	https://lens.org/099-456-855-908-848	Granted Patent	yes	12	1	2	099-456-855-908-848;;046-369-973-511-149	US	2	099-456-855-908-848;;046-369-973-511-149	US	0	A61B5/746;;A61B5/02405;;A61B5/02438;;A61B5/1112;;A61B5/14551;;A61B5/18;;A61B5/4818;;A61B5/6806;;A61B5/7203;;A61B5/7445;;A61B5/7455;;A61B5/746;;A61B5/02405;;A61B5/02438;;A61B5/1112;;A61B5/14551;;A61B5/18;;A61B5/4818;;A61B5/6804;;A61B5/6806;;A61B5/7203;;A61B5/742;;A61B5/7445;;A61B5/7455	A61B5/00;;A61B5/024;;A61B5/11;;A61B5/1455;;A61B5/18		0	0				ACTIVE	X
162	US	B2	US 11684298 B2	075-890-563-794-739	45104	2023	US 202217860070 A	44749	US 202217860070 A;;US 202163219325 P	44384	Wearable, non-intrusive microneedle sensor	Disclosed here are devices, systems, and methods for continuous monitoring of biomarkers using a wearable, non-intrusive microneedle sensor patch platform. In some aspects, a wearable, non-intrusive microneedle sensor device includes a microneedle sensor unit couplable to an electronics unit, where the microneedle sensor unit comprises a substrate, an array of spiked microneedle structures config…	UNIV CALIFORNIA	TEHRANI FARSHAD;;WANG JOSEPH;;TEYMOURIAN HAZHIR	THE REGENTS OF THE UNIVERSITY OF CALIFORNIA (2023-03-03)	https://lens.org/075-890-563-794-739	Granted Patent	yes	16	2	15	156-634-521-426-990;;034-340-905-829-249;;060-959-925-183-424;;082-998-493-974-328;;104-080-200-548-550;;075-890-563-794-739;;193-815-226-404-363;;113-286-477-422-715;;062-744-728-587-280;;163-444-501-171-691;;111-990-459-699-08X;;046-403-441-376-931;;044-507-493-195-853;;175-467-168-630-969;;192-309-140-460-948	CN;;EP;;JP;;US;;CA;;AU;;WO;;MX	15	156-634-521-426-990;;034-340-905-829-249;;060-959-925-183-424;;082-998-493-974-328;;104-080-200-548-550;;075-890-563-794-739;;193-815-226-404-363;;113-286-477-422-715;;062-744-728-587-280;;163-444-501-171-691;;111-990-459-699-08X;;046-403-441-376-931;;044-507-493-195-853;;175-467-168-630-969;;192-309-140-460-948	CN;;EP;;JP;;US;;CA;;AU;;WO;;MX	0	A61B5/14514;;A61B5/685;;A61B2562/166;;A61B5/14532;;A61B5/14546;;A61B5/1486;;A61B5/14865;;A61B5/14503;;A61B5/14735;;A61B5/685;;A61B2562/046;;A61B2562/125;;A61B5/0022	A61B5/1473;;A61B5/00		44	42	011-231-628-275-120;;049-512-331-323-822;;049-180-221-166-362;;014-497-499-043-282;;029-367-953-734-630;;082-709-017-167-556;;022-816-115-405-690;;142-638-494-708-158;;031-788-736-073-896;;106-400-214-142-730;;057-058-378-163-11X;;009-356-309-057-641;;067-056-605-080-001;;041-021-158-366-628;;009-506-097-832-36X;;068-681-124-906-861;;060-786-957-321-876;;018-811-279-230-885;;027-395-516-120-564;;…	24853270;;10.1016/j.tibtech.2014.04.005;;10.1126/sciadv.aav3294;;pmc6357758;;30746477;;10.1021/ac504300n;;25496376;;30688433;;10.1021/acs.accounts.8b00555;;10.2337/diaspect.21.2.112;;10.1021/acs.chemrev.8b00573;;30689360;;10.2217/pme-2018-0044;;30259801;;pmc12294383;;28416667;;pmc5422810;;10.1073/pnas.1701740114;;10.1111/acer.14172;;31469451;;pmc6779481;;10.1016/j.snb.2019.02.020;;10.1038/nature1…	ISA, International Search Report and Written Opinion for PCT Application No. PCT/US2020/036424, dated Oct. 14, 2022. 13 pages.;;Bandodkar, A. J. et al. Non-invasive wearable electrochemical sensors: a review. Trends Biotechnol. 32, 363-371 (2014).;;Bandodkar, A. J. et al. Battery-free, skin-interfaced microfluidic/electronic systems for simultaneous electrochemical, colorimetric, and volumetric a…	ACTIVE	X
163	US	B2	US 11944409 B2	024-606-938-570-192	45384	2024	US 202117368547 A	44383	US 202117368547 A;;US 201916513738 A;;US 201862700532 P	43300	Wearable device for threat evaluation and data collection	Systems and methods for threat evaluation and data collection are described herein. An example method may commence with collecting, by a wearable device, sensor data from one or more sensors installed on the wearable device. The wearable device may be worn by a user and be communicatively coupled to a central data portal and one or more external sources. The method may include receiving external …	HDWB LLC	HOFFMANN ERIC WILLIAM;;WARREN JOHN MYRL;;HALL NICHOLAS M		https://lens.org/024-606-938-570-192	Granted Patent	yes	8	0	2	024-606-938-570-192;;177-522-277-277-692	US	10	089-468-203-008-743;;168-864-960-390-968;;025-873-816-690-180;;198-661-041-961-393;;139-532-106-596-972;;178-368-378-449-24X;;177-522-277-277-692;;024-606-938-570-192;;131-927-957-616-236;;139-820-746-155-186	US	0	H04Q9/00;;H04Q2209/10;;H04Q2209/40;;H04Q2209/50;;H04Q2209/823;;A61B5/0022;;A61B5/0024;;A61B5/0205;;A61B5/6802;;A61B5/7246;;A61B2560/0242;;A61B5/0205;;A61B5/0024;;A61B2560/0242;;A61B5/7246;;A61B5/6802;;A61B5/0022	A61B5/0205;;A61B5/00		0	0				ACTIVE	X
164	US	B2	US 10918332 B2	029-875-659-081-625	44243	2021	US 201916387446 A	43572	US 201916387446 A;;US 2017/0059286 W;;US 201762455986 P;;US 201662415155 P	42674	Systems and methods for monitoring physical therapy of the knee and other joints	Systems, devices, and methods for post-surgical joint range of motion measurement, activity monitoring, as well as monitoring compliance with post-operative extremity elevation and cooling recommendations are provided. The system comprises sensor(s) to be attached adjacent a joint of the patient, with limb attachment element(s), applications running on a computing device of the patient and medica…	ZIPLINE MEDICAL INC	BELSON AMIR;;ICHIRYU KEIICHIRO;;KIMURA ZACHARY;;SHUGHART MARK;;SAMPSON HAROLD;;STEWART DAREN;;STORNE ERIC;;TIGHE JOHN	ZIPLINE MEDICAL INC (2019-04-20)	https://lens.org/029-875-659-081-625	Granted Patent	yes	247	85	8	023-648-496-027-73X;;029-875-659-081-625;;097-503-301-512-418;;160-115-755-543-698;;158-817-176-334-482;;001-024-100-795-158;;159-083-885-844-318;;140-946-650-307-316	US;;WO	8	023-648-496-027-73X;;029-875-659-081-625;;097-503-301-512-418;;160-115-755-543-698;;158-817-176-334-482;;001-024-100-795-158;;159-083-885-844-318;;140-946-650-307-316	US;;WO	0	A41D13/1281;;A61B5/00;;A61B5/0002;;A61B5/1121;;A61B5/4528;;G06F3/0481;;A41D1/002;;A61B5/0004;;A61B5/002;;A61B5/1121;;A61B5/4585;;A61B5/4848;;A61B5/4878;;A61B2505/09;;G06F3/0484;;A61B5/0002;;A41D13/1281;;A61B5/00;;A61B5/4528;;G06F3/0481	G08B1/08;;A41D1/00;;A41D13/12;;A61B5/00;;A61B5/11;;G06F3/0481;;G06F3/0484		89	2	104-649-564-057-57X;;057-072-951-112-747	10.7759/cureus.3102;;30338178;;pmc6173276;;27882274;;pmc5106206;;10.7759/cureus.827	U.S. Appl. No. 10/159,825, filed Dec. 25, 2018, Amir et al.;;Ann; Davis et al., “Effect of Surgical Incision Closure Device on Skin Perfusion Following Total Ankle Arthroplasty”, UFHealth, 2017, Poster.;;Bauback; Safa et al., “In Vivo Efficacy Study Showing Comparative Advantage of Bacterial Infection Prevention with Zip-type Skin Closure Device vs. Subcuticular Sutures”, Cureus, Aug. 4, 2018, 31…	ACTIVE	X
165	US	B2	US 11969264 B2	113-979-548-305-164	45412	2024	US 202017072446 A	44120	US 202017072446 A;;TW 106115201 A;;US 201715648989 A	42863	Adaptive controller used in photoplethysmography sensing system	An adaptive controller used in a photoplethysmography sensing system, comprises a plurality of hardware circuits which are configured to: receive a photoplethysmography signal (hereinafter, “PPG signal”) processed; determine whether the PPG signal processed satisfies with a requirement; output the PPG signal processed if the PPG signal processed satisfies with a requirement; and adjust a gain of …	AMENGINE CORP	CHAO PAUL C P;;TU TSE-YI;;PAN BO-WEI;;WU YAN-HWA	NATIONAL CHIAO TUNG UNIVERSITY (2017-07-05);;AMENGINE CORPORATION (2020-09-29)	https://lens.org/113-979-548-305-164	Granted Patent	yes	4	0	6	113-979-548-305-164;;142-819-384-859-433;;055-997-726-953-728;;025-428-713-273-282;;095-602-292-997-548;;076-761-523-313-115	TW;;US	6	113-979-548-305-164;;025-428-713-273-282;;142-819-384-859-433;;055-997-726-953-728;;095-602-292-997-548;;076-761-523-313-115	TW;;US	0	A61B5/7225;;A61B5/021;;A61B5/02416;;A61B5/0261;;A61B5/14532;;A61B5/14551;;A61B5/7221;;A61B5/7225;;A61B5/021;;A61B5/02416;;A61B5/0261;;A61B5/14532;;A61B5/14551;;A61B5/7221;;A61B5/0059	A61B5/00;;A61B5/021;;A61B5/024;;A61B5/026;;A61B5/145;;A61B5/1455		1	0			Office Action of corresponding TW applicaiton, published on Apr. 27, 2018.	ACTIVE	X
166	US	B2	US 10292646 B2	106-749-533-736-466	43606	2019	US 201514699536 A	42123	KR 20140152085 A	41947	Mobile health care device and operating method thereof	Provided are a health care device and a method of operating the health care device. The method includes: detecting, by the health care device, biosignal information of a user through skin of the user; obtaining health status information of the user by using the detected biosignal information; providing a task of the user for improving a health status, according to the obtained health status infor…	SAMSUNG ELECTRONICS CO LTD	EOM KUNSUN	SAMSUNG ELECTRONICS CO. LTD (2015-04-06)	https://lens.org/106-749-533-736-466	Granted Patent	yes	26	4	4	136-457-522-843-358;;106-749-533-736-466;;107-628-828-615-368;;117-790-199-151-668	KR;;US	4	136-457-522-843-358;;106-749-533-736-466;;107-628-828-615-368;;117-790-199-151-668	KR;;US	0	A61B5/486;;A61B5/0205;;A61B5/021;;A61B5/02416;;A61B5/053;;A61B5/1102;;A61B5/14532;;A61B5/332;;A61B5/389;;A61B5/4519;;A61B5/4806;;A61B5/4866;;A61B5/4872;;A61B5/4875;;A61B5/6824;;A61B5/7246;;A61B5/7282;;A61B5/742;;A61B5/7475;;A61B5/0205;;A61B5/02416;;A61B5/053;;A61B5/14532;;A61B5/4519;;A61B5/4806;;A61B5/4866;;A61B5/4872;;A61B5/4875;;A61B5/6824;;A61B5/742;;A61B5/7475;;A61B5/486;;A61B5/0205;;A61B5/02…	A61B5/00;;A61B5/0205;;A61B5/021;;A61B5/024;;A61B5/11;;A61B5/145;;A61B5/332		0	0				ACTIVE	X
167	US	B2	US 10653343 B2	180-660-471-045-477	43970	2020	US 201314042517 A	41547	US 201314042517 A;;US 201261706384 P	41179	System and method for non-invasive glucose monitoring using near infrared spectroscopy	A method for noninvasively measuring blood concentration of a substance, such as, for example, blood glucose levels, is described herein. The method may comprise measuring an initial absorption data using near infrared spectroscopy (NIR), and obtaining a second set of absorption data. The initial absorption data, along with the second set of absorption data, may then be adjusted by applying a con…	NEW JERSEY INST TECHNOLOGY	DHAWAN ATAM	NEW JERSEY INSTITUTE OF TECHNOLOGY (2016-11-20)	https://lens.org/180-660-471-045-477	Granted Patent	yes	7	2	3	186-483-049-551-984;;180-660-471-045-477;;097-236-167-850-374	US	3	186-483-049-551-984;;180-660-471-045-477;;097-236-167-850-374	US	0	A61B5/14532;;A61B5/0075;;A61B5/02438;;A61B5/14546;;A61B5/14551;;A61B5/6816;;A61B5/14532;;A61B5/0075;;A61B5/02438;;A61B5/14546;;A61B5/1455;;A61B5/14551;;A61B5/6816	A61B5/00;;A61B5/024;;A61B5/145;;A61B5/1455		9	5	001-078-021-460-177;;015-528-580-818-861;;001-078-021-460-177;;004-670-726-157-890;;167-357-028-847-042	20639166;;10.1109/tbme.2010.2059025;;22275202;;10.1109/rbme.2010.2081975;;20639166;;10.1109/tbme.2010.2059025;;14639751;;10.1366/000370203769699090;;10.1016/0169-2607(95)01640-f;;7587160	D'Alessandro, Brian, and Atam P. Dhawan. “Depth-dependent hemoglobin analysis from multispectral transillumination images.”IEEE Transactions on Biomedical Engineering 57.10 (2010): 2568-2571.;;Atam P. Dhawan, et al., “Optical Imaging Modalities for Biomedical Applications”, IEEE Transactions on Reviews in Biomedical Engineering, vol. 3(1), pp. 69-92, 2010.;;Brian D'Alessandro, et al., Depth-Depen…	ACTIVE	X
168	US	B2	US 10912519 B2	156-765-471-334-333	44236	2021	US 201815972787 A	43227	US 201815972787 A;;US 201762501995 P	42860	Personal healthcare device	A method and system for measuring personal health, the method comprising detecting a photoplethysmograph (PPG) wave, the PPG wave generated based on a combination of infra-red and red lights, transmitting the PPG wave to a server, the server processing the PPG wave to infer biometric statistics based on machine learned correlations generated from a training set of PPG waves and biometric data, re…	GALDI FABIO;;HELO CORP	GALDI FABIO	HELO CORP (2020-10-20)	https://lens.org/156-765-471-334-333	Granted Patent	yes	9	0	10	142-893-046-583-839;;078-941-031-957-046;;000-510-311-027-658;;131-986-452-737-219;;151-778-765-637-154;;050-154-469-213-763;;118-307-115-549-876;;156-765-471-334-333;;003-995-813-266-402;;051-002-107-481-166	EP;;JP;;US;;WO	10	142-893-046-583-839;;078-941-031-957-046;;000-510-311-027-658;;050-154-469-213-763;;151-778-765-637-154;;131-986-452-737-219;;118-307-115-549-876;;156-765-471-334-333;;003-995-813-266-402;;051-002-107-481-166	EP;;JP;;US;;WO	0	A61B5/02;;A61B5/0205;;A61B5/021;;A61B5/024;;A61B5/0002;;A61B5/1118;;A61B5/165;;A61B5/4815;;A61B5/681;;A61B2562/0238;;A61B5/7267;;A61B5/02433;;A61B5/02438;;A61B5/165;;A61B5/4815;;A61B5/681;;A61B2562/0238;;A61B5/0013;;A61B5/7246;;A61B5/742;;G16H50/20;;G16H20/30;;A61B5/7278;;A61B5/02;;A61B5/021;;A61B5/024;;A61B5/0205;;A61B5/0002;;A61B5/1118;;A61B5/14532;;A61B5/1455;;G16H40/67;;G16H50/30;;A61B2562/02…	A61B5/00;;A61B5/02;;A61B5/0205;;A61B5/021;;A61B5/024;;A61B5/11;;A61B5/145;;A61B5/1455;;A61B5/16;;G16H20/30;;G16H50/20		0	0				ACTIVE	X
169	US	B1	US 10004434 B1	023-473-446-977-305	43277	2018	US 201313834199 A	41348	US 201313834199 A	41348	Microfluidic systems for electrochemical transdermal analyte sensing using a capillary-located electrode	A sensing device, designed to be used in contact with the skin, contains a plurality of individually controllable sites for electrochemically monitoring an analyte, such as glucose, in interstitial fluid of a user. The device includes at least a hydrophobic layer designed to contact the skin; a capillary channel providing an opening adjacent the skin; a metal electrode layer having a sensor layer…	UNIV GEORGETOWN	PARANJAPE MAKARAND	GEORGETOWN UNIVERSITY (2013-04-12)	https://lens.org/023-473-446-977-305	Granted Patent	yes	49	4	3	078-400-962-528-66X;;079-196-653-994-289;;023-473-446-977-305	US;;WO	3	078-400-962-528-66X;;079-196-653-994-289;;023-473-446-977-305	US;;WO	0	A61B5/14532;;A61B5/14514;;A61B5/1486;;A61B5/14532;;A61B5/14514;;A61B5/1477;;A61B5/1486;;A61B5/1491	A61B5/145;;A61B5/1477;;A61B5/1491		33	19	008-618-600-720-104;;106-247-639-218-456;;104-708-072-253-467;;010-454-564-458-527;;045-927-151-729-373;;077-956-361-069-039;;090-413-991-610-766;;061-433-789-590-913;;022-986-834-453-594;;059-179-798-883-803;;074-027-011-567-69X;;065-937-168-775-805;;016-211-505-991-876;;085-057-091-113-263;;081-877-059-101-447;;020-740-726-329-577;;088-448-449-925-344;;014-417-498-830-724;;012-566-965-513-477	10.1117/2.1200808.1247;;10.1016/s0924-4247(03)00049-9;;9032952;;10.1016/s0379-0738(96)02035-x;;10.1159/000210747;;3272746;;7004238;;10.1111/j.1530-0277.1980.tb04837.x;;4686102;;4356588;;pmc2604941;;19064929;;10.1073/pnas.0810903105;;10.1021/ac9013989;;20000334;;10.1021/ac800604v;;18698798;;19551982;;10.1021/ac801729t;;10.1016/j.polymer.2006.01.032;;10.1166/jnn.2010.3073;;21133069;;10.1016/j.aca.2…	Paranjape, Makarand, “Pain-Free Diabetic Monitoring Using Transdermal Patches,” SPIE Newsroom, 2008. 2 pp.;;International Search Report and Written Opinion for Application No. PCT/US14/19183, dated May 14, 2014, 7 pp.;;Paranjape et al. “A PDMS dermal patch for non-intrusive transdermal glucose sensing” Sens. Actuat. A; 2003; vol. 104; p. 195-204 (2003), Entire Document.;;Connolly et al. “Minimall…	ACTIVE	X
171	US	B2	US 12150778 B2	115-312-663-091-912	45622	2024	US 201916258352 A	43490	US 201916258352 A;;US 201615043330 A	42412	Method and apparatus for providing biofeedback during meditation exercise	A method and apparatus for providing biofeedback during a meditation exercise are disclosed. In one aspect, the wearable device includes one or more biometric sensors and a user interface. The method may involve prompting the user, via the user interface, to perform a meditation exercise, the meditation exercise being associated with a target physiological metric related to the physiology of the …	FITBIT INC	VENKATRAMAN SUBRAMANIAM;;PANTELOPOULOS ALEXANDROS	FITBIT INC (2016-02-12)	https://lens.org/115-312-663-091-912	Granted Patent	yes	35	2	5	115-312-663-091-912;;156-722-664-087-260;;163-506-445-495-050;;061-230-787-123-123;;160-264-661-538-117	CN;;US	5	115-312-663-091-912;;156-722-664-087-260;;163-506-445-495-050;;061-230-787-123-123;;160-264-661-538-117	CN;;US	0	G06F1/163;;A61B5/7435;;A61B5/0205;;A61B5/16;;A61B5/681;;A61B5/486;;A61B5/7271;;A61B5/7246;;A61B5/742;;A61B5/7405;;A61B5/7455;;A61B5/0022;;A61B5/02055;;A61B5/11;;A61B5/0059;;A61B5/14532;;A61B5/14542;;A61B5/02405;;A61B5/0816;;A61B5/021;;A61B5/389;;A61B5/369;;A61B5/486;;A61B5/7271;;A61B5/7246;;A61B5/742;;A61B5/7405;;A61B5/7455;;A61B5/0022;;A61B5/02055;;A61B5/11;;A61B5/0059;;A61B5/14532;;A61B5/14542;…	A61B5/05;;A61B5/00;;A61B5/0205;;A61B5/021;;A61B5/024;;A61B5/08;;A61B5/11;;A61B5/145;;A61B5/16;;A61B5/369;;A61B5/389		9	0			HeartMath, Inc. 2016, Minimize stress in just minutes a day, http://heartmath.com, 3 pp.;;MIT CSAIL, Jun. 2015, Video Magnification, http://people.csail.mit.edu/mrub/vidmag, 4 pp.;;US Notice of Allowance dated Nov. 20, 2018 issued in U.S. Appl. No. 15/043,330.;;US Office Action dated Jul. 13, 2016 issued in U.S. Appl. No. 15/043,330.;;US Office Action dated Aug. 3, 2018 issued in U.S. Appl. No. 1…	ACTIVE	X
174	US	B2	US 11977358 B2	039-867-596-069-903	45419	2024	US 202117404617 A	44425	US 202117404617 A	44425	Systems and methods for dynamic biometric control of IoT devices	Systems and methods of dynamic IoT device regulation and control can aid in shifting a user's emotional state from a first state of mind to a preferred second state of mind, using the user's biomarker response to device settings. Particularly, an IoT device controller may be embedded within a wearable device that is wirelessly connected to a computing device and one or more IoT devices. Initially…	STEWART ROBIN H;;LI QILIANG	STEWART ROBIN H;;LI QILIANG		https://lens.org/039-867-596-069-903	Granted Patent	yes	10	0	2	068-168-981-366-858;;039-867-596-069-903	US	2	068-168-981-366-858;;039-867-596-069-903	US	0	G05B2219/2642;;G05B15/02;;G06N3/0464;;A61B5/14551;;A61B5/021;;A61B5/02416;;A61B5/14532;;A61B2503/12;;A61B5/0022;;A61B5/02055;;A61B5/681;;A61B5/6823;;A61B5/6824;;A61B5/6826;;A61B5/7267;;A61B2560/0223;;A61B5/486;;A61B5/165;;A61B5/4836;;G05B13/0265;;A61B5/0022;;G16Y30/00;;G06N20/00;;A61B2503/12;;A61B5/02416;;A61B5/14532;;A61B5/14551;;A61B5/02055;;A61B5/021	G05B13/02;;A61B5/00;;A61B5/0205;;A61B5/021;;A61B5/024;;A61B5/145;;A61B5/1455;;G06N20/00;;G16Y30/00		1	1	014-761-745-994-455	10.1093/mnras/stab632	Swanson, R., Lamb, M., Correia, C. M., Sivanandam, S., Kutulakos, K. (2021). Closed loop predictive control of adaptive optics systems with Convolutional Neural Networks. Monthly Notices of the Royal Astronomical Society, 503(2), 2944-2954. https://doi.org/10.1093/mnras/stab632 (Year: 2021).	ACTIVE	X
175	EP	B1	EP 3928687 B1	184-104-195-457-923	45469	2024	EP 21179782 A	43396	US 201762576560 P;;EP 18869622 A;;US 2018/0057011 W	43032	WEARABLE DEVICE WITH PRE-CONNECTED ANALYTE SENSOR		DEXCOM INC	HALAC JASON;;BARRY JOHN CHARLES;;CLARK BECKY L;;DRING CHRIS W;;GRAY JOHN MICHAEL;;HIGLEY KRIS ELLIOT;;JACKSON JEFF;;KELLER DAVID A;;LEE TED TANG;;MITCHELL JASON;;PIRONDINI KENNETH;;REGO DAVID;;SCHOONMAKER RYAN EVERETT;;SIMPSON PETER C;;GADD CRAIG THOMAS;;STEWART KYLE THOMAS;;HAYES JOHN STANLEY		https://lens.org/184-104-195-457-923	Granted Patent	yes	4	1	38	121-346-356-700-629;;157-384-635-378-998;;054-266-414-394-888;;119-463-085-270-516;;151-582-460-915-913;;160-688-407-856-928;;065-970-041-318-409;;190-789-500-380-961;;163-849-292-591-539;;116-584-106-697-044;;051-351-277-579-452;;067-613-618-277-558;;147-621-635-653-391;;144-054-381-684-202;;143-845-093-297-595;;066-551-556-123-459;;085-101-142-025-964;;070-996-400-550-792;;149-525-538-031-120;;…	CN;;DK;;EP;;JP;;US;;CA;;AU;;WO	40	157-384-635-378-998;;121-346-356-700-629;;113-855-819-031-878;;051-351-277-579-452;;116-584-106-697-044;;160-688-407-856-928;;065-970-041-318-409;;190-789-500-380-961;;054-266-414-394-888;;163-849-292-591-539;;151-582-460-915-913;;147-621-635-653-391;;067-613-618-277-558;;144-054-381-684-202;;085-101-142-025-964;;066-551-556-123-459;;143-845-093-297-595;;007-913-965-764-412;;149-525-538-031-120;;…	DK;;CN;;EP;;JP;;US;;CA;;AU;;WO	0	A61B2562/085;;A61B2562/12;;A61B5/1473;;A61B5/14865;;A61B5/14532;;A61B5/1495;;A61B2562/16;;A61B2562/043;;A61B2562/125;;A61B2562/227;;A61B2560/0412;;A61B5/6833;;Y02A90/10;;A61B5/14865;;A61B5/14532;;G01N27/3273;;A61B5/1495;;A61B2562/085;;A61B2562/12;;A61B2562/08;;A61B5/6849;;A61M15/0068;;A61M15/008;;A61M15/0083;;G16H20/17;;G16H40/63;;A61B5/0031;;A61B5/14546;;A61M5/003;;A61M5/14244;;A61M5/14276;;A61M…	A61B5/00;;A61B5/145;;A61B5/1473;;A61B5/1486;;A61B5/1495		0	0				ACTIVE	X
177	US	B2	US 11363975 B2	125-952-348-053-949	44733	2022	US 202117526645 A	44515	US 202117526645 A;;US 202117461215 A;;US 202117207347 A;;US 201916355919 A;;US 201514747583 A;;US 201113283562 A;;US 26578705 A	38657	Analyte monitoring device and methods of use	An analyte monitor includes a sensor, a sensor control unit, and a display unit. The sensor has, for example, a substrate, a recessed channel formed in the substrate, and conductive material disposed in the recessed channel to form a working electrode. The sensor control unit typically has a housing adapted for placement on skin and is adapted to receive a portion of an electrochemical sensor. Th…	ABBOTT DIABETES CARE INC	PEYSER THOMAS A;;HELLER ADAM	ABBOTT DIABETES CARE INC (2007-11-20)	https://lens.org/125-952-348-053-949	Granted Patent	yes	2769	3	33	107-743-412-163-744;;125-952-348-053-949;;126-186-962-313-815;;017-456-438-573-229;;003-032-822-232-19X;;010-874-822-600-268;;099-984-086-270-657;;117-019-434-908-255;;149-724-388-584-660;;025-619-481-278-990;;086-621-581-533-560;;136-841-370-064-078;;173-773-084-313-571;;079-502-491-605-350;;053-338-412-051-527;;067-164-981-516-559;;029-908-931-201-71X;;083-138-017-019-334;;169-258-794-566-505;;…	DK;;EP;;LT;;ES;;US;;CA;;WO	33	107-743-412-163-744;;125-952-348-053-949;;126-186-962-313-815;;017-456-438-573-229;;003-032-822-232-19X;;010-874-822-600-268;;099-984-086-270-657;;117-019-434-908-255;;149-724-388-584-660;;025-619-481-278-990;;086-621-581-533-560;;136-841-370-064-078;;173-773-084-313-571;;079-502-491-605-350;;053-338-412-051-527;;067-164-981-516-559;;029-908-931-201-71X;;169-258-794-566-505;;185-023-885-850-580;;…	DK;;EP;;LT;;ES;;US;;CA;;WO	0	A61B5/0031;;A61B5/14546;;A61B5/4839;;A61B5/7445;;A61B5/14532;;A61B5/14865;;A61B5/1495;;A61B5/0031;;A61B5/14546;;A61B5/4839;;A61B5/7445;;A61B5/14532;;A61B5/14865;;A61B5/742;;A61B5/0002;;A61B5/1473	A61B5/1486;;A61B5/00;;A61B5/145;;A61B5/1473		778	348	136-791-935-548-81X;;062-360-289-025-864;;010-601-725-111-91X;;101-292-518-663-191;;056-703-879-057-297;;030-155-762-644-019;;004-149-141-436-651;;016-731-054-793-457;;080-559-561-995-335;;044-807-213-528-815;;027-538-525-436-179;;015-020-161-517-40X;;025-919-454-564-785;;014-700-576-603-812;;004-851-060-590-788;;075-958-432-122-199;;052-356-140-149-389;;035-090-282-884-790;;033-562-815-299-181;;…	10.1016/s0956-5663(02)00099-4;;12392956;;10.1021/ja00391a001;;2889225;;10.1098/rstb.1987.0021;;10.1109/51.294001;;10.1016/0022-0728(65)85063-x;;10.2337/diab.39.12.1519;;2245876;;10.2337/diabetes.39.12.1519;;10.1016/s0956-5663(03)00220-3;;14611755;;18615658;;10.1002/bit.260430310;;10.1016/s0956-5663(97)00025-0;;9366023;;9451795;;10.1016/s0956-5663(97)00083-3;;10.1016/0956-5663(93)80028-n;;8311939;…	U.S. Appl. No. 11/265,787 (U.S. Pat. No. 8,974,386), filed Nov. 1, 2005 (Mar. 10, 2015).;;U.S. Appl. No. 13/283,562 (U.S. Pat. No. 9,066,697), filed Oct. 27, 2011 (Jun. 30, 2015).;;U.S. Appl. No. 14/747,583 (U.S. Pat. No. 10,231,654), filed Jun. 23, 2015 (Mar. 19, 2019).;;U.S. Appl. No. 16/355,919 (U.S. Pat. No. 10,952,652), filed Mar. 18, 2019 (Mar. 23, 2021).;;U.S. Appl. No. 17/207,347 (U.S. Pa…	ACTIVE	X
178	US	B2	US 9642538 B2	021-114-412-256-641	42864	2017	US 201615275444 A	42638	US 201615275444 A;;US 201514866500 A;;US 201615275388 A;;US 201562194264 P;;US 201662276934 P;;US 201662307375 P;;US 201662312614 P;;US 201662373283 P;;US 201662383313 P	42204	System and method for a biosensor monitoring and tracking band	A health care band operably attaches a biosensor to a patient. The biosensor includes one or more sensors for collecting vitals of a patient and a wireless transmitter that is configured to communicate with an EMR network that stores and maintains an EMR of the patient. The biosensor stores a unique identification associated with the patient's EMR such that vitals measured by the biosensor may be…	SANMINA CORP	NEWBERRY ROBERT STEVEN	TRILINEAR BIOVENTURES LLC (2021-05-11);;SANMINA CORPORATION (2017-03-30)	https://lens.org/021-114-412-256-641	Granted Patent	yes	26	14	4	122-336-741-407-071;;086-424-349-698-317;;057-556-230-178-595;;021-114-412-256-641	US	131	179-070-786-682-854;;051-423-668-728-46X;;192-775-441-955-889;;193-721-990-482-423;;049-949-122-953-635;;022-557-424-110-032;;122-336-741-407-071;;030-118-234-652-67X;;047-112-106-269-991;;083-647-744-364-439;;137-631-319-430-993;;197-036-189-056-47X;;156-423-012-420-259;;075-956-629-088-247;;123-321-065-252-100;;092-644-301-869-908;;192-460-711-332-694;;074-107-887-275-421;;107-487-756-852-930;;…	CN;;EP;;US;;CA;;WO	0	A61B5/02438;;A61B5/0008;;A61B5/002;;A61B5/01;;A61B5/02055;;A61B5/021;;A61B5/024;;A61B5/02416;;A61B5/1118;;A61B5/117;;A61B5/14532;;A61B5/14546;;A61B5/14551;;A61B5/681;;A61B5/6823;;A61B5/6824;;A61B5/6825;;A61B5/6826;;A61B90/96;;A61B90/98;;G16H40/63;;G16Z99/00;;A61B5/02438;;A61B5/0002;;A61B5/0008;;A61B5/002;;A61B5/01;;A61B5/02;;A61B5/02055;;A61B5/021;;A61B5/024;;A61B5/02416;;A61B5/02427;;A61B5/1118;…	A61B5/1455;;A61B5/00;;A61B5/0205;;A61B5/021;;A61B5/024;;A61B5/11;;A61B5/117;;A61B5/145;;A61B90/96;;G16Z99/00		8	4	048-694-324-312-846;;019-257-479-508-897;;013-038-103-078-368;;044-616-361-583-881	10.1109/tiiec.2013.18;;10.1055/s-0028-1119378;;19214922;;10.2174/157340312801215782;;pmc3394104;;22845812;;10.1887/0750304677/b470c4	PCT/US2016/053532. Int'l Search Report & Written Opinion (Dec. 9, 2016).;;KC Manhesh et al., Wearable Wireless Intelligent Multi-Parameter Health Monitoring Watch, 2013, Texas Instruments India Educators' Conference, IEEE, p. 61-64.;;Abdallah et al., Design of a Compact Multi-Sensor System for Non-Invasive Glucose Monitoring Using Optical Spectroscopy, International Conference on Electronics, Bio…	ACTIVE	X
179	US	B2	US 10842390 B2	132-854-860-745-906	44159	2020	US 201615547548 A	42403	US 201615547548 A;;US 201562111431 P;;EP 2016052214 W	42038	Methods, systems, and wearable apparatus for obtaining multiple health parameters	The present invention includes systems and methods directed towards a wearable device (100, 200) that can measure health parameters in two levels. The wearable device can measure a health parameter of a user using an attached sensor (112). This sensor measurement is checked against a threshold database (126, 146, 156) that details an action to be taken if the sensor measurement satisfies a health…	KONINKLIJKE PHILIPS NV	CRONIN JOHN;;BODKIN JOSEPH GEORGE	KONINKLIJKE PHILIPS N.V (2017-08-02)	https://lens.org/132-854-860-745-906	Granted Patent	yes	6	3	11	148-243-124-720-696;;147-538-059-795-975;;196-453-690-652-866;;030-584-324-929-79X;;145-761-516-762-132;;132-854-860-745-906;;029-510-130-842-744;;039-566-388-236-237;;136-295-124-407-13X;;008-454-549-385-946;;191-827-098-753-125	CN;;EP;;JP;;RU;;US;;WO	11	191-827-098-753-125;;196-453-690-652-866;;147-538-059-795-975;;030-584-324-929-79X;;145-761-516-762-132;;132-854-860-745-906;;029-510-130-842-744;;039-566-388-236-237;;136-295-124-407-13X;;008-454-549-385-946;;148-243-124-720-696	CN;;EP;;JP;;RU;;US;;WO	0	A61B5/486;;A61B5/0006;;A61B5/002;;A61B5/6802;;A61B5/7405;;A61B5/742;;A61B5/0006;;A61B5/002;;A61B5/486;;A61B5/7405;;A61B5/742;;G16H40/63;;G16H40/67;;G16H50/20;;A61B5/0255;;A61B5/486;;A61B5/6802;;A61B5/681;;G16H50/30;;A61B5/0006;;A61B5/0002;;A61B5/002;;A61B5/01;;A61B5/02055;;A61B5/02438;;A61B5/14532;;A61B5/486;;A61B5/681;;A61B5/7405;;A61B5/742;;A61B5/7455;;G16H40/63;;G16H40/67;;G16H50/20;;G16H50/30	A61B5/0205;;A61B5/00;;A61B5/01;;A61B5/024;;A61B5/145;;G16H40/63;;G16H50/20;;G16H50/30		0	0				ACTIVE	X
181	US	B2	US 12042299 B2	078-777-455-414-553	45496	2024	US 201817052769 A	43223	CN 2018085472 W	43223	Electronic patch	Provided herein is an electronic patch for applying to a wearable item. The electronic patch includes a sensor comprising a sensor pad and a sensor base that together define a stepped arrangement, an electrically conductive underlayer disposed under the sensor base, a circuit layer disposed under the underlayer and electrically coupled to the sensor via the underlayer, a first elastic layer overl…	AAG WEARABLE TECH PTY LTD	EDGINGTON SEAN;;BACCALINI FRANK;;MCCLOSKEY PAUL	AAG WEARABLE TECHNOLOGIES PTY LTD (2020-11-16)	https://lens.org/078-777-455-414-553	Granted Patent	yes	7	0	14	166-759-508-559-088;;146-425-207-591-986;;078-777-455-414-553;;035-499-963-420-194;;175-255-689-519-33X;;000-017-214-009-133;;198-505-211-997-088;;075-754-798-407-143;;197-551-520-210-745;;009-817-156-835-578;;074-465-243-650-492;;040-694-488-395-747;;085-648-090-984-563;;115-579-022-183-924	CN;;EP;;TW;;US;;CA;;AU;;WO;;NZ	14	166-759-508-559-088;;146-425-207-591-986;;078-777-455-414-553;;035-499-963-420-194;;175-255-689-519-33X;;000-017-214-009-133;;198-505-211-997-088;;075-754-798-407-143;;197-551-520-210-745;;009-817-156-835-578;;074-465-243-650-492;;040-694-488-395-747;;085-648-090-984-563;;115-579-022-183-924	CN;;EP;;TW;;US;;CA;;AU;;WO;;NZ	0	A61B5/68335;;A61B2560/0412;;A61B2562/164;;C09J5/06;;A61B5/6804;;C09J7/29;;C09J2301/304;;C09J2301/314;;C09J2203/358;;C09J2400/266;;A61B5/257;;A61B5/256;;A61B5/263;;A61B5/265;;A61B5/266;;A61B2562/125;;A61B5/68335;;C09J7/255;;C09J7/40;;A61B5/02055;;A61B5/0816;;A61B5/14551;;A61B5/6833;;A61B5/688;;A61B2560/0412;;A61B2562/14;;A61B2562/164;;C09J5/06;;C09J175/04	A61B5/00;;A61B5/0205;;A61B5/08;;A61B5/1455;;C09J5/06;;C09J7/25;;C09J7/40;;C09J175/04		2	0			Patent Cooperation Treaty: International Preliminary Report on Patentability for PCT/CN2018/085472 dated Nov. 3, 2020; 5 pages.;;Patent Cooperation Treaty: International Search Report and Written Opinion for PCT/CN2018/085472 dated Feb. 2, 2019; 7 pages.	ACTIVE	X
182	US	B2	US 10076254 B2	193-011-445-898-371	43361	2018	US 201414572587 A	41989	US 201414572587 A	41989	Optical communication with optical sensors	A wearable computing device includes an electro-optical sensor to translate received light into an electrical signal. During a first mode of operation of the wearable computing device, a physical parameter of a wearer of the wearable computing device is assessed from the electrical signal. During a second mode of operation of the wearable computing device, encoded communication data is extracted …	MICROSOFT TECHNOLOGY LICENSING LLC	WOO KEVIN;;DE LEON CEASAR BARCENAS;;HINGORANI VINOD L;;HOLVERSON ERIK	MICROSOFT TECHNOLOGY LICENSING LLC (2014-12-10)	https://lens.org/193-011-445-898-371	Granted Patent	yes	26	0	11	028-708-458-302-36X;;062-172-845-198-54X;;039-997-501-732-203;;100-827-915-984-417;;170-335-540-371-590;;036-214-072-603-602;;037-539-523-712-106;;134-453-768-307-079;;060-041-641-119-149;;089-009-279-118-313;;193-011-445-898-371	CN;;EP;;KR;;TW;;JP;;US;;WO	11	028-708-458-302-36X;;062-172-845-198-54X;;039-997-501-732-203;;100-827-915-984-417;;170-335-540-371-590;;036-214-072-603-602;;134-453-768-307-079;;037-539-523-712-106;;060-041-641-119-149;;089-009-279-118-313;;193-011-445-898-371	CN;;EP;;KR;;TW;;JP;;US;;WO	0	H04B10/1143;;A61B5/02427;;A61B5/02438;;A61B5/14552;;A61B5/681;;A61B2560/0214;;A61B2560/0456;;A61B2562/222;;A61B2562/228;;H04B10/1143;;A61B5/02427;;A61B5/02438;;A61B5/14552;;A61B5/681;;A61B2560/0214;;A61B2560/0456;;A61B2562/222;;A61B2562/228;;H04B10/1143;;A61B5/02427;;A61B5/02438;;A61B5/14552;;A61B5/681;;A61B2560/0214;;A61B2560/0456;;A61B2562/222;;A61B2562/228;;H04B10/1143	A61B5/1455;;A61B5/00;;A61B5/024;;H04B10/114		8	0			Fingas, Jon, “TomTom's new GPS watches track your heart rate without a chest strap (update: US pricing)”, http://www.engadget.com/2014/04/03/tomtom-cardio-gps-watches/, Apr. 3, 2014, 10 pages.;;Goode, Lauren, “Samsung's New Gear Fit Needs to Work on the “Fit” Part”, http://recode.net/2014/04/08/samsungs-new-gear-fit-needs-to-work-on-the-fit-part/, Apr. 8, 2014, 10 pages.;;“Samsung Gear Fit, Gear …	ACTIVE	X
183	US	B2	US 11508476 B2	091-221-672-921-540	44887	2022	US 202117464304 A	44440	US 202117464304 A;;US 202117354343 A;;US 201816017480 A;;US 201514730047 A;;US 201314042629 A;;US 55520706 A	39021	Infusion devices and methods	Medical devices, systems, and methods related thereto a glucose monitoring system having a first display unit in data communication with a skin-mounted assembly, the skin-mounted assembly including an in vivo sensor and a transmitter. The first display unit and a second display unit are in data communication with a data management system. The first display unit comprises memory that grants a firs…	ABBOTT DIABETES CARE INC	REGGIARDO CHRISTOPHER V;;KIAIE NAMVAR;;THOMSON JAMES	ABBOTT DIABETES CARE INC (2007-07-12)	https://lens.org/091-221-672-921-540	Granted Patent	yes	1219	0	29	193-727-144-219-535;;132-764-820-104-494;;193-624-800-555-448;;006-928-148-660-467;;051-410-710-105-803;;139-603-726-475-528;;188-130-383-483-306;;020-653-974-869-518;;093-317-928-805-295;;004-380-116-674-22X;;138-857-183-183-943;;116-114-245-747-068;;181-133-571-168-839;;043-956-105-873-18X;;022-940-122-500-731;;065-465-724-696-479;;132-593-911-854-844;;180-331-542-514-369;;091-221-672-921-540;;…	CN;;EP;;JP;;RU;;US;;CA;;AU;;WO;;BR;;MX	29	193-727-144-219-535;;132-764-820-104-494;;193-624-800-555-448;;006-928-148-660-467;;051-410-710-105-803;;139-603-726-475-528;;188-130-383-483-306;;020-653-974-869-518;;093-317-928-805-295;;004-380-116-674-22X;;138-857-183-183-943;;116-114-245-747-068;;181-133-571-168-839;;043-956-105-873-18X;;022-940-122-500-731;;065-465-724-696-479;;132-593-911-854-844;;180-331-542-514-369;;091-221-672-921-540;;…	CN;;EP;;JP;;RU;;US;;CA;;AU;;WO;;BR;;MX	0	A61B5/14532;;A61M5/14244;;A61M5/14276;;A61M5/31525;;A61M5/31546;;A61M2205/276;;A61M2205/3561;;A61M2205/3569;;G16H40/63;;G16H20/17;;G16H40/67;;G16Z99/00;;A61B5/14532;;A61M5/14244;;A61M5/14276;;A61M5/31525;;A61M5/31546;;A61M2205/276;;A61M2205/3561;;A61M2205/3569;;H04W12/08;;H04L63/104;;G16H40/67;;G16Z99/00;;H04L63/105;;G06F21/44;;A61M5/1723;;G06F21/30;;G16H40/63;;G16H20/17	G06F21/30;;A61B5/145;;A61M5/142;;A61M5/172;;A61M5/315;;G06F21/44;;G16H20/17;;G16H40/63;;G16H40/67;;G16Z99/00;;H04L9/40;;H04W12/08		36	3	101-616-131-798-743;;018-802-969-903-114;;035-499-417-163-864	10.1039/an9962101789;;9008404;;10.1201/9781315274263-6;;2917764;;10.1109/10.16465	Barbosa, R. M., et al., “Electrochemical Studies of Zinc in Zinc-Insulin Solution”, Journal of the Royal Society of Chemistry, Analyst, vol. 121, No. 12, 1996, pp. 1789-1793.;;Bard, A. J., et al., “Methods Involving Forced Convection—Hydrodynamic Methods”, Electrochemical Methods—Fundamentals and Applications, 2001, pp. 331-367.;;Kissinger, P. T., “Introduction to Analog Instrumentation”, Laborat…	ACTIVE	X
184	US	B2	US 11857338 B2	095-348-086-823-474	45293	2024	US 201716338077 A	43010	FR 1659545 A;;EP 2017075012 W	42647	System for analysing the physico-chemical properties of a skin surface	The invention relates to a system for analysing physico-chemical properties of a skin surface, comprising: at least one contact sensor for applying to said skin surface to be analysed in order to determine specific information, once or twice a day, about a particular area of the skin surface; at least one environment sensor designed to accompany a user throughout the day and to measure, throughou…	IEVA	TREGUER YANN	IEVA (2019-03-03)	https://lens.org/095-348-086-823-474	Granted Patent	yes	8	0	8	145-904-084-305-135;;138-122-533-789-391;;088-336-607-251-968;;168-498-554-644-195;;182-281-754-447-305;;066-517-368-385-209;;095-348-086-823-474;;159-065-913-217-751	CN;;EP;;US;;FR;;WO	8	145-904-084-305-135;;138-122-533-789-391;;088-336-607-251-968;;168-498-554-644-195;;182-281-754-447-305;;066-517-368-385-209;;095-348-086-823-474;;159-065-913-217-751	CN;;EP;;US;;FR;;WO	0	A61B5/6801;;A45D2044/007;;A61B5/0004;;A61B5/0015;;A61B5/0071;;A61B5/4272;;A61B5/441;;A61B5/4836;;A61B5/4857;;A61B5/4875;;A61B5/7246;;A61B5/7264;;A61B2560/0242;;A61B2562/028;;G16H50/20;;A61B5/6801;;A61B5/0071;;A61B5/4272;;A61B5/441;;A61B5/4857;;A61B5/4875;;A61B5/7246;;A61B5/7264;;A61B2560/0242;;A61B2562/028	A61B5/00		2	0			Neuman, M. R. (2000, Biopotential Electrodes, J.D. Bronzino Ed., Second Edition, CRC Press LLC, Boca Raton) (Year: 2000).;;International Search Report issued in PCT Patent Application No. PCT/EP2017/075012 dated Dec. 21, 2017.	ACTIVE	X
185	US	B2	US 11452457 B2	033-817-992-880-702	44831	2022	US 202016735743 A	43837	US 202016735743 A;;US 201614913894 A;;IB 2013003256 W	41509	Method and device for improving prediction and detection of change in a physiological condition	Devices, methods and systems for predicting and detecting a change in a physiological condition of a subject are disclosed. A device for detecting and predicting a change in physiological condition of a subject may include one or more processors configured to: (i) analyze changes in a heart rhythm of a subject; (ii) analyze a signal from one or more biomarkers that are associated with a physiolog…	MEDICUS ENG APS	FLEISCHER JESPER;;CICHOSZ SIMON LEBECH	MEDICUS ENGINEERING APS (2016-03-22)	https://lens.org/033-817-992-880-702	Granted Patent	yes	11	0	8	045-038-812-853-647;;007-791-311-082-129;;112-245-588-412-192;;034-334-277-999-130;;158-411-160-096-934;;030-619-117-176-024;;033-817-992-880-702;;159-246-082-612-015	EP;;US;;WO	8	045-038-812-853-647;;007-791-311-082-129;;112-245-588-412-192;;034-334-277-999-130;;158-411-160-096-934;;030-619-117-176-024;;033-817-992-880-702;;159-246-082-612-015	EP;;US;;WO	0	G16Z99/00;;A61B5/02405;;A61B5/14532;;A61B5/7267;;A61B5/7275;;A61B5/746;;A61M5/1723;;G16H50/20;;A61B5/0205;;A61B5/02405;;A61B5/14532;;A61B5/7267;;A61B5/7275;;A61B5/7405;;A61B5/742;;A61B5/746;;A61M5/1723;;G16H50/20;;G16Z99/00	A61B5/02;;A61B5/00;;A61B5/0205;;A61B5/024;;A61B5/145;;A61M5/172;;G16H50/20;;G16Z99/00		3	2	005-201-014-043-54X;;086-621-953-880-476	10.1186/1687-6180-2011-33;;10.1186/1687-6180-2012-215	FJ Gimeno-Blanes et al., “On the feasibility of tilt test outcome early prediction using ECG and pressure parameters”, EURASIP Journal on Advances in Signal Processing, vol. 33, Jan. 1, 2011, pp. 1-17, XP055132750.;;International Search Report and Written Opinion dated Aug. 11, 2014 in International Application PCT/IB2013/003256.;;Mostefa Mesbah et al., “Automatic Seizure Detection Based on the C…	ACTIVE	X
186	US	B2	US 10799173 B2	189-686-060-330-030	44117	2020	US 201314057676 A	41565	US 201314057676 A	41565	Fall prediction assessment	Methods, apparatuses, and computer readable mediums for fall prediction assessment are provided. In a particular embodiment, a fall prediction controller is configured to compare a hydration indicator associated with a person to a hydration threshold and based on a result of the comparison of the hydration indicator to the hydration threshold, generate a fall prediction assessment of the patient.	CAREPREDICT INC	WILMINK GERALD J	CAREPREDICT INC (2018-08-09);;WISEWEAR CORPORATION (2013-10-17)	https://lens.org/189-686-060-330-030	Granted Patent	yes	28	0	2	189-686-060-330-030;;112-325-333-145-168	US	2	189-686-060-330-030;;112-325-333-145-168	US	0	A61B5/443;;A61B5/1117;;A61B5/7275;;G16H10/60;;G16H40/63;;G16H50/30;;A61B5/443;;A61B5/1117;;A61B5/7275;;G16H10/60;;G16H40/63;;G16H50/30	A61B5/00;;A61B5/11;;G16H10/60;;G16H40/63;;G16H50/30		5	5	082-224-594-150-898;;038-927-772-201-594;;007-845-858-156-532;;027-385-111-321-094;;093-614-309-458-782	23174546;;10.1016/j.pmrj.2012.08.007;;22710422;;10.1123/ijsnem.22.4.257;;10.4108/icst.bodynets2009.5873;;10.1080/07315724.2007.10719661;;17921468;;10.1109/bsn.2009.29	Concannon, Leah G., Matthew J. Grierson, and Mark A. Harrast. “Exercise in the older adult: from the sedentary elderly to the masters athlete.” PM&R 4.11 (2012): 833-839.;;Carter, et al. “Hydration Status of Arabic Adolescents and Young Men: Measurement, Evaluation, and a School-Based Initiative to Improve Drinking Behavior”, International Journal of Sport Nutrition and Exercise Metabolism, vol. …	ACTIVE	X
188	US	B2	US 11596348 B2	135-796-276-650-744	44992	2023	US 201615085452 A	42459	US 201615085452 A;;US 201562140989 P	42094	Wearable devices configured to support measurement and transmission apparatus	Devices that take a novel approach to parameter measurement and output or transmission of signals, medicine, heat, etc. These devices are compact, versatile, relatively inexpensive, and require minimal training to be effectively used. These devices can be configured as interchangeable devices incorporated into a wearable article or device.	GEELUX HOLDINGS LTD	ABREU MARCIO MARC	GEELUX HOLDINGS LTD (2016-03-30)	https://lens.org/135-796-276-650-744	Granted Patent	yes	25	1	8	108-493-635-526-212;;174-044-565-791-765;;100-982-771-811-874;;082-818-999-585-599;;020-088-872-497-857;;135-796-276-650-744;;194-023-999-685-217;;155-975-694-202-548	EP;;JP;;US;;CA;;AU;;WO	8	108-493-635-526-212;;174-044-565-791-765;;100-982-771-811-874;;082-818-999-585-599;;020-088-872-497-857;;135-796-276-650-744;;194-023-999-685-217;;155-975-694-202-548	EP;;JP;;US;;CA;;AU;;WO	0	A61B5/6806;;A61B5/0002;;A61B5/01;;A61B5/021;;A61B5/6826;;A61B5/441;;A61B5/0002;;A61B5/0015;;A61B5/01;;A61B5/021;;A61B5/6806;;A61B5/6826	A61B5/00;;A61B5/01;;A61B5/021		5	0			International Preliminary Report on Patentability dated Oct. 12, 2017, in corresponding PCT Application No. PCT/US16/25000, 9 pp.;;Notification of Transmittal of the International Search Report and the Written Opinion of the International Searching Authority; PCT/US2016/025000 dated Jul. 1, 2016.;;International Search Report dated Jul. 1, 2016, in corresponding PCT Application No. PCT/US16/25000,…	ACTIVE	X
190	US	B2	US 10278591 B2	150-106-341-387-106	43592	2019	US 201514779857 A	42123	KR 20140051420 A;;KR 2015004324 W	41758	Blood glucose measurement method and apparatus using multiple body signals	Blood glucose measurement methods and apparatuses are provided using multiple body signals. The methods and apparatuses are employed to estimate blood glucose in a noninvasive manner by using a change in the absorbance of glucose according to a blood glucose level and to correct the estimated blood glucose using different types of blood glucose measurement methods. The blood glucose measurement a…	HUINNO CO LTD	GIL YEONG JOON	HUINNO CO. LTD (2015-09-23)	https://lens.org/150-106-341-387-106	Granted Patent	yes	6	25	8	033-353-097-128-511;;047-444-579-959-328;;068-108-397-193-13X;;185-690-780-190-853;;061-175-821-324-756;;117-984-912-031-801;;196-139-402-965-425;;150-106-341-387-106	CN;;EP;;KR;;US;;AU;;WO	8	068-108-397-193-13X;;047-444-579-959-328;;033-353-097-128-511;;185-690-780-190-853;;061-175-821-324-756;;117-984-912-031-801;;196-139-402-965-425;;150-106-341-387-106	CN;;EP;;KR;;US;;AU;;WO	0	A61B5/0205;;A61B5/01;;A61B5/0245;;A61B5/0285;;A61B5/0533;;A61B5/0816;;A61B5/14532;;A61B5/1455;;A61B5/14551;;A61B5/352;;A61B5/6824;;A61B5/6826;;A61B5/7225;;A61B5/0205;;A61B5/01;;A61B5/0245;;A61B5/0285;;A61B5/0533;;A61B5/0816;;A61B5/14532;;A61B5/1455;;A61B5/14551;;A61B5/33;;A61B5/352;;A61B5/6824;;A61B5/6826;;A61B5/7225	A61B5/1455;;A61B5/00;;A61B5/01;;A61B5/0205;;A61B5/0245;;A61B5/0285;;A61B5/08;;A61B5/145;;A61B5/352		1	0			International Search Report issued in corresponding International Application No. PCT/KR2015004324 dated Aug. 11, 2015, 3 pages.	ACTIVE	X
191	US	B2	US 11529098 B2	147-146-670-551-593	44915	2022	US 202016904755 A	44000	CN 201811185859 A;;CN 2019110383 W	43384	Contact lens, system and method for monitoring glucose	A contact lens includes a contact lens body and a glucose detection sheet disposed on the contact lens body. The glucose detection sheet includes a glucose recognition layer, a photonic crystal array is provided in the glucose recognition layer, and the glucose recognition layer is configured to recognize glucose.	BEIJING BOE TECHNOLOGY DEV CO LTD;;BOE TECHNOLOGY GROUP CO LTD	ZHU LIN	BEIJING BOE TECHNOLOGY DEVELOPMENT CO. LTD (2020-02-13);;BOE TECHNOLOGY GROUP CO. LTD (2020-02-13)	https://lens.org/147-146-670-551-593	Granted Patent	yes	11	0	4	134-876-476-341-608;;111-344-306-399-039;;044-361-381-824-003;;147-146-670-551-593	CN;;US;;WO	4	134-876-476-341-608;;111-344-306-399-039;;044-361-381-824-003;;147-146-670-551-593	CN;;US;;WO	0	G01N21/31;;G01N21/01;;G01N21/78;;A61B3/10;;A61B5/14532;;A61B5/1455;;A61B5/6821;;G01N21/7743;;G06T7/0012;;G06T7/90;;G06T2207/10024;;G06T2207/30041;;A61B5/6821;;A61B3/101;;A61B5/14507;;A61B5/14532;;A61B5/1455;;A61B2562/0233;;A61B2562/046;;G01N21/31;;G06T7/0012;;G06T7/90;;G06T2207/30041;;G08B21/02	A61B5/00;;A61B3/10;;A61B5/145;;A61B5/1455;;G01N21/31;;G06T7/00;;G06T7/90;;G08B21/02		6	0			First Office Action issued in Chinese Patent Application No. 201811185859.9, dated Nov. 1, 2019; with English translation.;;Second Office Action issued in Chinese Patent Application No. 201811185859 9, dated Apr. 20, 2020; with English translation.;;Third Office Action issued in Chinese Patent Application No. 201811185859 9, dated Aug. 27, 2020; with English translation.;;Decision of Rejection is…	ACTIVE	X
193	US	B2	US 12036008 B2	009-922-278-956-17X	45489	2024	US 202117396946 A	44417	US 202117396946 A;;US 201615344571 A;;US 201562255529 P	42324	Gigahertz frequency fringing near-field biomedical sensor	A near-field sensor method and device for obtaining biomedical information is disclosed. A transmission-line aperture arrangement configured to guide electromagnetic waves and emit near-field fringing energy, is placed near the skin. The transmission line is excited at a narrow-band Gigahertz frequency. The near-field fringing energy emitted by the sensor device penetrates at least partially into…	CHIEN JUN CHAU;;CHEN STANLEY YUANSHIH	CHIEN JUN-CHAU;;CHEN STANLEY YUANSHIH		https://lens.org/009-922-278-956-17X	Granted Patent	yes	4	0	2	069-987-785-148-074;;009-922-278-956-17X	US	5	166-755-213-900-439;;009-922-278-956-17X;;069-987-785-148-074;;121-723-221-161-657;;107-031-117-592-612	US;;WO	0	A61B5/02438;;A61B5/0507;;A61B5/6893;;A61B5/6898;;A61B5/7225;;A61B2562/0228;;A61B5/14532;;A61B5/6833;;A61B5/02427;;A61B5/7203;;A61B5/02438;;A61B2562/0295;;A61B5/0507;;A61B2562/166;;A61B5/021	A61B5/00;;A61B5/021;;A61B5/024;;A61B5/0507		4	4	027-256-959-573-589;;084-338-557-469-785;;018-035-785-237-861;;124-883-677-213-592	10.1109/tbme.2015.2441951;;pmc4515215;;26057530;;10.1109/jssc.2014.2384037;;10.1109/jsen.2021.3069460;;10.1109/mwsym.2015.7167141	R. Mukkamala et al., “Toward Ubiquitous Blood Pressure Monitoring via Pulse Transit Time: Theory and Practice,” IEEE Trans. Biomed. Eng., vol. 62, No. 8, pp. 1879-1901, 2015, doi: 10.1109/TBME.2015.2441951.;;K. Song, U. Ha, S. Park, J. Bae, and H. J. Yoo, “An Impedance and Multi-Wavelength Near-Infrared Spectroscopy IC for Non-Invasive Blood Glucose Estimation,” IEEE J. Solid-State Circuits, vol.…	ACTIVE	X
194	US	B2	US 10722160 B2	047-597-868-641-508	44040	2020	US 201515531982 A	42341	US 201515531982 A;;US 201462087172 P;;US 201562112608 P;;US 2015/0063836 W	41976	Non-invasive and wearable chemical sensors and biosensors	A non-invasive epidermal electrochemical sensor device includes an adhesive membrane; a flexible or stretchable substrate disposed over the adhesive membrane; and an anodic electrode assembly disposed over the flexible or stretchable substrate including an iontophoretic electrode. The device includes a cathodic electrode assembly disposed adjacent to the anodic electrode assembly over the flexibl…	UNIV CALIFORNIA	WANG JOSEPH;;BANDODKAR AMAY JAIRAJ;;MERCIER PATRICK	THE REGENTS OF THE UNIVERSITY OF CALIFORNIA (2019-06-12)	https://lens.org/047-597-868-641-508	Granted Patent	yes	41	9	5	047-597-868-641-508;;118-095-004-952-513;;109-446-158-102-154;;011-616-378-135-455;;112-277-325-403-418	US;;WO	5	047-597-868-641-508;;118-095-004-952-513;;109-446-158-102-154;;011-616-378-135-455;;112-277-325-403-418	US;;WO	0	G01N33/66;;A61B2562/00;;A61B5/6833;;A61B5/14532;;A61B5/6833;;A61B5/14532;;G01N33/66;;A61B2562/00;;A61B2562/0215;;A61B5/14521;;A61B5/1486	A61B5/1486;;A61B5/00;;A61B5/145;;G01N33/66		46	42	084-943-987-603-564;;050-071-841-548-604;;022-706-801-398-796;;011-231-628-275-120;;050-667-049-913-441;;025-597-893-727-890;;003-690-143-043-420;;077-077-959-101-880;;009-506-097-832-36X;;106-417-804-518-137;;024-836-747-302-412;;031-693-467-027-522;;049-213-858-488-869;;029-760-799-434-103;;137-547-577-047-266;;025-668-297-283-82X;;163-551-153-357-257;;014-842-693-241-623;;101-719-075-998-039;;…	10.3390/s20400127;;10.1002/(sici)1096-9136(199712)14:5+<s7::aid-dia522>3.0.co;2-r;;9450510;;10.1002/(sici)1096-9136(199712)14:5+<s7::aid-dia522>3.3.co;2-i;;10.1016/j.bios.2013.11.039;;24333582;;24853270;;10.1016/j.tibtech.2014.04.005;;10.1039/c2an36422k;;23113321;;10.1007/s10439-010-9918-4;;20087770;;12052350;;10.1016/s0956-5663(01)00304-9;;10.1089/152091500316737;;11467320;;10.1021/ac401573r;;23…	Zhu, et al. 2002. Planar Amperometric glucose sensor based on glucose oxidase immobilized by chitosan film on prussian blue layer. (Year: 2002).;;PCT Application No. PCT/US2015/063836, International Search Report and Written Opinion, dated Feb. 12, 2016, 13 pages.;;Amos, A.F. et al., “The Rising Global Burden of Diabetes and its Complications: Estimates and Projections to the Year 2010”, Diabetic…	ACTIVE	X
195	US	B2	US 12150741 B2	076-787-704-476-154	45622	2024	US 201916961793 A	43478	US 201916961793 A;;US 201862617273 P;;IB 2019050252 W	43114	Fully non-invasive blood sugar level monitoring apparatus integrated with real-time health support system	A non-invasive continuous blood sugar level monitoring apparatus integrated with a real-time health support system. The blood sugar levels and other vital physiological information of the user can also be tracked wirelessly through the apparatus. The apparatus has an integrated real-time alert and reminder feature for notifying the user during medication and unusual physiological conditions. An a…	GOPALAKRISHNAN MURALIDHARAN;;MURALIDHARAN GOPALAKRISHNAN	GOPALAKRISHNAN MURALIDHARAN		https://lens.org/076-787-704-476-154	Granted Patent	yes	3	0	8	076-787-704-476-154;;035-927-795-408-10X;;064-631-173-417-238;;127-516-745-131-009;;094-295-391-971-374;;099-937-330-328-717;;123-559-039-302-223;;087-798-054-717-122	US;;CA;;WO	8	076-787-704-476-154;;035-927-795-408-10X;;064-631-173-417-238;;127-516-745-131-009;;094-295-391-971-374;;099-937-330-328-717;;123-559-039-302-223;;087-798-054-717-122	US;;CA;;WO	0	A61B5/1455;;A61B5/0075;;A61B5/14532;;G16H40/67;;G16H40/20;;G16H50/30;;G16H50/70;;G16H50/20;;G16H20/10;;G16H40/40;;G16H20/60;;G16H20/70;;G16H70/20;;G16H10/65;;A61B5/0002;;A61B5/02055;;A61B5/021;;A61B5/024;;A61B5/053;;A61B5/1112;;A61B5/14532;;A61B5/14551;;A61B5/165;;A61B5/4809;;A61B5/486;;A61B5/4872;;A61B5/6803;;A61B5/681;;A61B5/721;;A61B5/742;;A61B5/746;;A61B5/748;;A61B2560/0214;;A61B2560/0223;;A6…	A61B5/0205;;A61B5/00;;A61B5/01;;A61B5/021;;A61B5/024;;A61B5/053;;A61B5/11;;A61B5/145;;A61B5/1455;;A61B5/16;;A61J7/04;;G01J3/02;;G01J3/10;;G01J3/28;;G01J3/45;;G01P15/18;;G05B19/042;;G06F3/01;;G06F3/0488;;G06Q50/00;;G16H10/65;;G16H20/10;;G16H20/60;;G16H20/70;;G16H40/20;;G16H40/40;;G16H40/67;;G16H50/20;;G16H50/30;;G16H50/50;;G16H50/70;;G16H70/20;;H02J7/00;;H02J7/02;;H02J7/34;;H02J50/10		0	0				ACTIVE	X
196	US	B1	US 10998101 B1	153-552-136-734-77X	44320	2021	US 201916714759 A	43814	US 201916714759 A	43814	Health management	A method includes capturing continuously vital signs and motion data from one or more sensors adapted to be coupled to a user; capturing food consumption of the user; predicting a predetermined health condition of the user based on the vital signs; generating a plan for the predetermined health condition; and prompting the user to execute the plan with a closed-loop feedback based on sensor data.	TRAN BAO;;TRAN HA	TRAN BAO;;TRAN HA		https://lens.org/153-552-136-734-77X	Granted Patent	yes	25	76	3	003-576-532-230-036;;053-027-461-711-386;;153-552-136-734-77X	US	3	003-576-532-230-036;;053-027-461-711-386;;153-552-136-734-77X	US	0	G06Q50/01;;G16H40/67;;G16H50/30;;G16H20/60;;G16H20/30;;G16H40/63;;G16H50/20;;A61B5/0205;;A61B5/021;;A61B5/0537;;A61B5/1118;;A61B5/14532;;A61B5/4836;;A61B5/486;;A61B5/4866;;A61B5/7267;;A61B5/7275;;G06N3/08;;G06N7/01;;G06N3/045;;G16H40/67;;A61B5/0537;;G16H20/30;;G16H50/50;;G06Q50/01;;G16H20/60;;G16H10/60;;G06N3/08;;G06N3/04;;A61B5/486;;A61B5/4866;;A61B5/14532;;A61B5/1118;;A61B5/0205;;A61B5/7267;;A6…	G16H40/67;;A61B5/00;;A61B5/0205;;A61B5/021;;A61B5/0537;;A61B5/11;;A61B5/145;;G06N3/04;;G06N3/08;;G06Q50/00;;G16H10/60;;G16H20/30;;G16H20/60;;G16H50/30;;G16H50/50		2	2	156-539-615-220-12X;;020-718-062-616-600	pmc2584181;;18835944;;10.2337/dc08-1239;;10.3945/ajcn.2008.26354;;19056599	Atkinson, F. S., Foster-Powell, K., & Brand-Miller, J. C. (2008). International tables of glycemic index and glycemic load values: 2008. Diabetes care, 31(12), 2281-2283. doi:10.2337/dc08-1239.;;Jennie Brand-Miller et al., “Moreover, Glycemic index, postprandial glycemia, and the shape of the curve in healthy subjects: analysis of a database of more than 1000 foods”, Am J Clin Nutr 2009;89:97-105.	ACTIVE	X
197	US	B2	US 11727771 B2	134-560-590-182-275	45153	2023	US 202117484663 A	44463	US 202117484663 A;;US 202063083699 P	44099	Tamper-resistant wearable caretaking device	Techniques are described herein for a wearable device that is configured to prevent unauthorized removal and to facilitate detection of unauthorized removal attempts or tampering with a band of the device. The wearable device includes one or more circuit systems, each of which is configured to conduct an electric current. Attempts to remove the device cause components of one or more of the circui…	GREGORY D OLSEN DDS MSD LLC	OLSEN GREGORY DAVID	GREGORY D. OLSEN DDS MSD LLC (2020-10-31)	https://lens.org/134-560-590-182-275	Granted Patent	yes	7	0	3	134-560-590-182-275;;036-564-667-790-697;;068-259-311-407-79X	US;;WO	3	134-560-590-182-275;;036-564-667-790-697;;068-259-311-407-79X	US;;WO	0	A44C5/145;;A44C5/0061;;A61B5/02438;;A61B5/1112;;A61B5/1118;;A61B5/14542;;A61B5/4833;;A61B5/681;;A61B5/6831;;A61B5/6843;;A61B5/6844;;A61B2505/07;;A61B2560/0276;;G06F21/86;;G08B13/06;;A44C5/0061;;A44C5/145;;A61B5/0205;;A61B5/681;;G06F1/163;;G08B25/016	G08B13/06;;A44C5/00;;A44C5/14;;A61B5/00;;A61B5/0205;;G06F1/16;;G08B25/01		1	0			The International Searching Authority, “Search Report” in Application No. PCT/US21/52082 , dated Dec. 23, 2021 18 pages.	ACTIVE	X
198	US	B2	US 11681886 B2	059-681-592-290-723	45097	2023	US 201916560599 A	43712	US 201916560599 A;;US 201862727589 P	43349	Genomic and environmental blockchain sensors	A system is described to create customized unique identification (UID) codes combined with customized printable optical or NFC sensors and to combine these unique sensors and unique IDs with unique environmental events, traceability, unique data from cell phones (including geolocation) and person-specific unique indicators such as biomarkers to create completely unique, low cost and proprietary p…	PEETERS JOHN P	PEETERS JOHN P		https://lens.org/059-681-592-290-723	Granted Patent	yes	63	1	7	059-681-592-290-723;;110-385-353-651-377;;131-488-349-756-380;;074-372-918-827-610;;197-980-525-783-636;;070-206-151-387-488;;040-491-315-246-620	US;;WO	7	059-681-592-290-723;;040-491-315-246-620;;131-488-349-756-380;;197-980-525-783-636;;074-372-918-827-610;;110-385-353-651-377;;070-206-151-387-488	US;;WO	0	H04N1/00307;;H04N2201/006;;A61B5/1032;;A61B5/0059;;A61B5/14514;;A61B5/14532;;A61B5/1455;;A61B2562/08;;A61B5/6833;;A61B5/0022;;A61B5/01;;A61B5/4833;;A61B2562/029;;A61B5/442;;A61B5/1112;;A61B2560/0242;;A61B2562/0247;;H04N1/00342;;G16H40/67;;G06Q20/0655;;G06Q20/29;;G06Q20/321;;G06Q2220/00;;G06Q20/02;;G06Q20/308;;G06Q30/0601;;G06Q10/087;;G06Q30/018;;H04L9/50;;G06Q20/401;;G06K7/1413;;G06K7/1417;;G06Q2…	A61B5/00;;A61B5/01;;A61B5/103;;A61B5/145;;A61B5/1455;;G01N33/53;;G06K7/10;;G06K7/14;;G06Q20/40;;H04L9/00;;H04N1/00		0	0				ACTIVE	X
199	US	B2	US 11529097 B2	049-371-171-015-911	44915	2022	US 201916694288 A	43794	US 201916694288 A;;US 201862770887 P;;US 201862770940 P;;US 201862770951 P	43427	Micro-coherence network strength and deep behavior modification optimization application	A subject's Default Mode Network is accessed through corresponding measurements of the Micro-Coherence Oximetry Network Strength (MCO-S). An associated MCO-S system (100) includes a wearable (102), a user device (112) and a processing platform (123). The wearable (102) collects subject information sufficient to enable monitoring and optimization of the subject's Default Mode Network include senso…	WELLNESS IP INC	HICKEY MICHAEL PETER	WELLNESS IP INC (2020-07-27)	https://lens.org/049-371-171-015-911	Granted Patent	yes	10	0	9	084-880-491-311-837;;106-702-654-769-346;;126-196-489-063-353;;049-371-171-015-911;;024-419-478-913-33X;;086-313-750-755-187;;020-650-454-209-168;;187-055-532-586-840;;056-140-985-043-140	EP;;US;;AU;;CA;;WO	9	024-419-478-913-33X;;084-880-491-311-837;;126-196-489-063-353;;106-702-654-769-346;;049-371-171-015-911;;086-313-750-755-187;;020-650-454-209-168;;187-055-532-586-840;;056-140-985-043-140	EP;;US;;AU;;CA;;WO	0	A61B5/05;;A61B5/02405;;A61B5/4064;;A61B5/14542;;A61B5/6831;;A61B5/349;;A61B5/389;;A61B5/369;;A61B5/0205;;A61B5/02405;;A61B5/0533;;A61B5/14551;;A61B5/165;;A61B5/486;;A61B5/4884;;A61B5/6803;;A61B5/7267;;A61B5/7278;;A61B5/372	A61B5/00;;A61B5/0205;;A61B5/024;;A61B5/0533;;A61B5/1455;;A61B5/16;;A61B5/369		1	0			Anderson et al., “Stress in America TM: Missing the Heath Care Connection”, Survey Report, Feb. 7, 2013, American Psychological Association, 64 pages.	ACTIVE	X
202	US	B2	US 10182748 B2	090-156-462-725-408	43487	2019	US 201214002341 A	40987	GB 201104513 A;;GB 201111126 A;;GB 2012050595 W	40619	System for the self-monitoring and regulation of blood glucose	The present invention relates to a self monitoring device for attachment to the body, which incorporates real-time and correlated measurement of body movement and physiological analytes of metabolism (e.g. glucose) that can be modulated by physical activity. The system enables real time and personalized modulation of the selected physiological analyte(s) through appropriately selected cued activi…	CATT MICHAEL;;TRENELL MICHAEL;;UNIV NEWCASTLE	CATT MICHAEL;;TRENELL MICHAEL	UNIVERSITY OF NEWCASTLE UPON TYNE (2013-09-06)	https://lens.org/090-156-462-725-408	Granted Patent	yes	11	11	6	172-510-527-140-331;;106-294-085-913-992;;131-052-438-081-912;;138-122-316-293-47X;;037-641-870-963-293;;090-156-462-725-408	DK;;EP;;US;;WO	8	172-510-527-140-331;;106-294-085-913-992;;132-710-638-247-276;;156-633-634-694-719;;037-641-870-963-293;;138-122-316-293-47X;;131-052-438-081-912;;090-156-462-725-408	DK;;EP;;US;;WO;;GB	0	A61B5/14532;;A61B5/1118;;A61B2562/0219;;A61B2562/028;;G16H20/17;;G16H20/30;;G16H50/20;;G16Z99/00;;A61B5/14532;;A61B5/0022;;A61B5/01;;A61B5/0531;;A61B5/1112;;A61B5/1118;;A61B5/14503;;A61B5/1459;;A61B5/7246;;A61B5/7405;;A61B5/742;;A61B5/7455;;A61B5/746;;A61B2562/0219;;A61B2562/028;;G16H20/10;;G16H20/17;;G16H20/30;;G16H20/40;;G16H50/20;;G16Z99/00	A61B5/145;;A61B5/00;;A61B5/01;;A61B5/053;;A61B5/11;;A61B5/1459;;G16H50/20		36	23	023-762-615-575-915;;061-771-912-661-118;;035-364-993-137-252;;014-221-364-799-325;;038-220-656-095-633;;033-900-484-751-274;;141-499-621-007-263;;134-438-254-318-648;;005-394-477-661-508;;018-360-596-362-355;;166-684-833-666-529;;058-081-491-520-432;;007-885-643-254-174;;047-020-925-654-73X;;046-432-643-692-636;;142-447-868-131-380;;013-050-565-612-037;;000-176-901-465-761;;046-946-270-070-014;;…	21084931;;10.1249/mss.0b013e3181eeb61c;;pmc2939842;;10.1089/dia.2008.0053;;19216684;;pmc2636965;;19191984;;10.1111/j.1365-2702.2008.02533.x;;12749557;;10.1093/sleep/26.3.342;;18690903;;10.2174/157339908785294352;;18628358;;10.1136/bjsm.2008.048868;;10.1152/japplphysiol.00150.2009;;19556460;;pmc2769890;;10.1177/193229680900300504;;20144414;;pmc2858164;;20200307;;10.2337/dc09-2303;;18325176;;10.125…	American College of Sports Medicine & American Diabetes Association; “Exercise and Type 2 Diabetes”; Medicine & Science in Sports & Exercise, vol. 42, No. 12; Dec. 2010; pp. 2282-2303.;;Allen, Nancy A., et al.; “Continuous Glucose Monitoring in Non-Insulin-Using Individuals with Type 2 Diabetes: Acceptability, Feasibility, and Teaching Opportunities”; Diabetes Technology & Therapeutics, vol. 11, …	ACTIVE	X
203	EP	B1	EP 2865325 B1	145-516-254-933-616	43061	2017	EP 13189895 A	41570	EP 13189895 A	41570	SKIN-ADHERABLE CRADLE FOR INFUSION PUMP OR CONTINUOUS BLOOD GLUCOSE MONITOR HAVING OPTICAL INDICATION MEANS		HOFFMANN LA ROCHE;;ROCHE DIABETES CARE GMBH	GESCHEIT ILLAI J	F. HOFFMANN-LA ROCHE AG (2016-09-07);;ROCHE DIABETES CARE GMBH (2016-09-07)	https://lens.org/145-516-254-933-616	Granted Patent	yes	7	0	5	103-456-334-311-82X;;075-394-966-017-974;;145-516-254-933-616;;178-934-628-336-103;;164-921-342-388-126	DK;;EP;;US	5	164-921-342-388-126;;075-394-966-017-974;;145-516-254-933-616;;178-934-628-336-103;;103-456-334-311-82X	DK;;EP;;US	0	A61B5/742;;A61B5/14532;;A61B5/6823;;A61B2090/0807;;A61B2560/04;;A61M5/1413;;A61M5/14248;;A61M2005/14268;;A61M2205/0227;;A61M2205/0238;;A61M2205/3303;;A61M2205/3561;;A61M2205/3569;;A61M2205/3592;;A61M2205/50;;A61M2205/502;;A61M2205/52;;A61M2205/583;;A61M2205/584;;A61M2209/01;;A61M2230/201;;A61M25/02;;A61B5/14532;;A61B5/4839;;A61B5/6802;;A61B5/6823;;A61B5/742;;A61B2090/0807;;A61B2560/04;;A61M5/1413…	A61B5/00;;A61B5/145;;A61M5/14;;A61M5/142		0	0				ACTIVE	X
204	US	B2	US 11517261 B2	067-520-680-081-297	44901	2022	US 201515511197 A	42257	CN 201410468258 A;;CN 201410468266 A;;CN 201410468268 A;;CN 201410468272 A;;CN 201410468521 A;;CN 201410468701 A;;CN 201410468705 A;;CN 201410788423 A;;CN 2015089303 W	41897	Method and device for determining inner and outer sides of limbs	The present application provides a method and device for determining inner and outer sides of limbs, and relates to the field of wearable devices. The method comprises: acquiring first somatosensory information of a first side of a limb of a user, the first side being an inner side or an outer side of the limb; and determining whether the first side is the inner side of the limb according to the …	BEIJING ZHIGU TECH CO LTD	LIU HAO	BEIJING ZHIGU TECH CO. LTD (2016-04-25)	https://lens.org/067-520-680-081-297	Granted Patent	yes	26	0	3	067-520-680-081-297;;059-093-355-594-538;;060-426-494-292-861	US;;WO	17	067-520-680-081-297;;060-426-494-292-861;;147-245-697-402-321;;105-243-442-282-732;;198-541-924-370-371;;123-757-622-878-884;;195-603-728-869-775;;070-300-129-558-632;;030-323-990-055-873;;172-435-760-014-73X;;014-516-297-489-48X;;000-666-134-325-144;;176-586-926-677-167;;059-093-355-594-538;;096-612-042-946-188;;094-696-203-985-953;;196-447-754-416-264	CN;;US;;WO	0	A61B5/7246;;A61B5/01;;A61B5/0531;;A61B5/14551;;A61B5/4872;;A61B5/681;;A61B5/01;;A61B5/02416;;A61B5/0531;;A61B5/14539;;A61B5/14542;;A61B5/14551;;A61B5/4872;;A61B5/7246;;A61B2562/029	A61B5/00;;A61B5/01;;A61B5/024;;A61B5/0531;;A61B5/145;;A61B5/1455		4	0			International Search Report and Written Opinion for Application No. PCT/CN2015/089303, dated Dec. 3, 2015, 10 pages.;;Sanxin Yu, Chapter 2—Basic Principals, Functional Diagnostics, Mar. 1, 1997, p. 204 (with English Translation), 4 pages.;;Office Action for Chinese Application No. 201410468266.9, dated Nov. 15, 2016, (with English Translation), 12 pages.;;Office Action for Chinese Application No.…	ACTIVE	X
206	US	B2	US 10251597 B2	085-714-891-654-057	43564	2019	US 201615135110 A	42481	US 201615135110 A	42481	Health tracking device	A device may receive, from a plurality of sensors, sensor data relating to a user. The device may include a plurality of types of sensors including a spectrometer and one or more of an accelerometer, a heart rate sensor, a blood pressure sensor, a blood sugar sensor, a perspiration sensor, a skin conductivity sensor, or an imaging sensor. The device may process the sensor data, from the plurality…	VIAVI SOLUTIONS INC	O'BRIEN NADA A;;HRUSKA CURTIS R;;VON GUNTEN MARC K;;PEDERSON CHRISTOPHER G;;HSIUNG CHANGMENG	VIAVI SOLUTIONS INC (2016-04-07)	https://lens.org/085-714-891-654-057	Granted Patent	yes	5	3	26	163-617-531-119-985;;050-784-468-261-348;;111-241-094-427-066;;041-781-148-624-859;;034-030-863-610-615;;023-691-361-138-778;;049-717-497-969-315;;156-471-035-348-41X;;038-821-496-442-408;;052-488-613-144-663;;091-368-098-507-56X;;179-244-500-014-277;;058-985-566-309-116;;126-223-822-482-051;;052-465-077-449-161;;075-003-248-350-309;;135-560-055-476-120;;085-714-891-654-057;;065-542-727-537-154;;…	CN;;EP;;JP;;HK;;US;;CA	26	163-617-531-119-985;;050-784-468-261-348;;111-241-094-427-066;;041-781-148-624-859;;034-030-863-610-615;;023-691-361-138-778;;049-717-497-969-315;;156-471-035-348-41X;;038-821-496-442-408;;052-488-613-144-663;;091-368-098-507-56X;;179-244-500-014-277;;058-985-566-309-116;;126-223-822-482-051;;052-465-077-449-161;;075-003-248-350-309;;135-560-055-476-120;;085-714-891-654-057;;065-542-727-537-154;;…	CN;;EP;;JP;;HK;;US;;CA	0	A61B5/0075;;A61B5/053;;A61B5/14532;;A61B5/4266;;G16H20/30;;G16H20/60;;G16H50/30;;A61B5/02055;;A61B5/14517;;A61B5/1118;;A61B5/746;;A61B5/4866;;A61B5/02438;;A61B5/021;;A61B2562/0219;;G16H40/63;;G16H50/20;;G16H40/67;;G16H20/30;;G16H20/60;;G01N33/02;;G16H20/70;;G16H30/40;;G16H40/63;;G16H50/20;;G16H40/67;;G16H20/30;;G16H20/60;;A61B5/0075;;A61B5/0205;;A61B5/021;;A61B5/02438;;A61B5/0531;;A61B5/1118;;A61…	A61B5/02;;A61B5/00;;A61B5/0205;;A61B5/021;;A61B5/024;;A61B5/053;;A61B5/11;;A61B5/145;;G01N21/27;;G01N33/02;;G06F3/0484;;G16H40/63;;G16H50/20		5	2	021-739-247-287-558;;007-829-933-818-322	10.1002/cem.877;;10.1016/s1389-1286(99)00033-x	J. A. FERNANDEZ PIERNA, BAETEN V., MICHOTTE RENIER A., COGDILL R. P., DARDENNE P.: "Combination of support vector machines (SVM) and near-infrared (NIR) imaging spectroscopy for the detection of meat and bone meal (MBM) in compound feeds", JOURNAL OF CHEMOMETRICS., WILEY, CHICHESTER, SUSSEX, ENGLAND., GB, vol. 18, no. 7-8, 1 July 2004 (2004-07-01), GB, pages 341 - 349, XP055330182, ISSN: 0886-938…	ACTIVE	X
207	US	B2	US 9855000 B2	140-288-546-012-073	43102	2018	US 201615158258 A	42508	US 201615158258 A;;US 201562163284 P	42142	Transdermal analyte sensing device	There is disclosed a transdermal analyte sensor device. The device includes a sensor cartridge having a membrane permeable to a target analyte transdermally received from a subject, a reservoir containing a fluid to receive the target analyte through the membrane and an enzyme to react with the target analyte to form a byproduct, a working electrode to generate an electrical current based on a co…	MILO SENSORS INC	LANSDORP BOB;;STRENK EVAN;;ARROYO NETZ;;IMBERMAN DANIEL	MILO SENSORS INC (2016-05-18)	https://lens.org/140-288-546-012-073	Granted Patent	yes	10	23	5	140-288-546-012-073;;022-208-135-395-398;;054-552-912-839-138;;145-258-190-282-869;;013-859-652-743-904	US;;WO	5	140-288-546-012-073;;022-208-135-395-398;;054-552-912-839-138;;145-258-190-282-869;;013-859-652-743-904	US;;WO	0	A61B5/1486;;A61B5/14532;;A61B5/14546;;A61B5/681;;A61B5/1486;;A61B5/14532;;A61B5/14546;;A61B5/681	A61B5/05;;A61B5/00;;A61B5/145;;A61B5/1486		1	0			World Intellectual Property Organization, International Search Report and Written Opinion for International Application No. PCT/2016/033105, dated Aug. 19, 2016, 10 total pages.	ACTIVE	X
208	US	B1	US 11426100 B1	147-618-722-833-895	44803	2022	US 201615363983 A	42703	US 201615363983 A;;US 201562264374 P	42346	Blood glucose trend meter	A system for obtaining and outputting real time blood glucose values or one or more indicators related thereto is described. The system comprises a sensor for obtaining blood glucose data from an individual in real time. The system includes an analyzer for comparing in a first comparison some or all of the blood glucose data obtained in real time and for generating an indicator in real time when …	SOCRATES HEALTH SOLUTIONS INC	SUTHERLAND DOUGLAS F;;SMITH SCOTT J	SOCRATES HEALTH SOLUTIONS INC (2016-11-01)	https://lens.org/147-618-722-833-895	Granted Patent	yes	73	0	1	147-618-722-833-895	US	1	147-618-722-833-895	US	0	A61B5/14532;;A61B5/7275;;A61B5/742;;A61B5/14532;;A61B5/742;;A61B5/7275	A61B5/145;;A61B5/00		12	0			International Search Report dated Nov. 22, 2013 in corresponding PCT application PCT/US13/65228, 2 pages.;;Written Opinion dated Nov. 22, 2013 in corresponding PCT Application No. PCT/US2013/065228; 6 pages.;;Supplementary European Search Report for corresponding EP Patent Application No. EP13846901 dated Apr. 29, 2016, 10 pages.;;Kozaitis, et al., “Laser Polarimetry for Measurement of Drugs in t…	ACTIVE	X
210	US	B2	US 10353996 B2	069-669-555-882-43X	43662	2019	US 201715424997 A	42772	US 201715424997 A	42772	Automated summarization based on physiological data	A computer-implemented method for generating an automated summary of a document based on physiological data annotation includes receiving a textual transcript, by a computer. Physiological data is received from one or more devices. Passages of the textual transcript are scored based on received physiological data. A summary of the textual transcript is automatically created, in response to said s…	IBM	BELLAMY RACHEL;;DIBIA VICTOR C	INTERNATIONAL BUSINESS MACHINES CORPORATION (2017-01-25)	https://lens.org/069-669-555-882-43X	Granted Patent	yes	12	3	2	027-576-359-247-512;;069-669-555-882-43X	US	2	027-576-359-247-512;;069-669-555-882-43X	US	0	G10L15/26;;A61B5/01;;A61B5/021;;A61B5/024;;A61B5/0531;;A61B5/0816;;A61B5/14542;;A61B5/165;;A61B5/681;;A61B2503/12;;G06F16/345;;G06F40/169;;G06F40/169;;A61B5/01;;A61B5/021;;A61B5/024;;A61B5/0531;;A61B5/0816;;A61B5/14542;;A61B5/165;;A61B5/681;;A61B2503/12;;G06F16/345;;G10L15/26	G06F17/27;;A61B5/00;;A61B5/01;;A61B5/021;;A61B5/024;;A61B5/053;;A61B5/08;;A61B5/145;;A61B5/16;;G06F16/34;;G06F17/24;;G10L15/26		0	0				ACTIVE	X
212	US	B2	US 11786153 B2	090-951-334-506-190	45216	2023	US 201916556540 A	43707	US 201916556540 A;;US 201862754603 P	43406	Wearable sensor	A wearable sensor system includes a flexible patch, an electronic circuit disposed on the flexible patch, and a disposable sensor disposed on the flexible patch and connected to the electronic circuit via a socket. The disposable sensor detects a chemical compound. The electronic circuit generates a detection signal commensurate with the chemical compound detected by the disposable sensor. The di…	UNIV JOHNS HOPKINS	GERASOPOULOS KONSTANTINOS;;PATRONE JULIA B;;HAMILTON LESLIE H;;CURRANO LUKE J;;HAGEDON MATTHEW A;;SAGE FELIX CONNOR;;ASTATKE MEKBIB	JOHNS HOPKINS UNIVERSITY (2019-08-27)	https://lens.org/090-951-334-506-190	Granted Patent	yes	11	0	2	063-066-389-622-411;;090-951-334-506-190	US	2	063-066-389-622-411;;090-951-334-506-190	US	0	A61B5/6833;;A61B5/0002;;A61B5/14517;;A61B5/14532;;A61B5/14546;;A61B5/1486;;A61B5/1486;;A61B5/0002;;A61B5/14517;;A61B5/14532;;A61B5/14546;;A61B5/1477;;A61B5/4266;;A61B5/6833;;A61B5/685;;A61B2560/0214	A61B5/1486;;A61B5/00;;A61B5/145;;A61B5/1477		43	41	018-022-226-575-271;;046-116-603-654-243;;093-137-537-132-902;;000-432-103-737-996;;097-282-301-806-321;;043-939-695-989-005;;099-977-482-503-058;;006-365-522-191-693;;114-206-043-258-624;;072-845-978-589-655;;039-415-999-052-674;;016-738-544-107-255;;009-506-097-832-36X;;102-293-633-845-020;;135-603-351-043-423;;057-058-378-163-11X;;041-021-158-366-628;;027-395-516-120-564;;072-745-827-117-660;;…	10.1002/admt.201600042;;10.1002/smll.201400483;;24706477;;10.1038/ncomms5779;;25182939;;10.1126/science.1206157;;21836009;;pmc5545889;;28798658;;10.1002/adfm.201770007;;10.1002/adfm.201604373;;25494220;;10.1038/ncomms6745;;10.1002/adma.201204426;;23440975;;10.1109/tbme.2014.2369991;;25398174;;10.1063/1.4921039;;26045728;;pmc4433483;;10.1002/elan.201400537;;10.1002/elan.201600106;;10.1039/c3an0167…	Ji, X. et al. (Aug. 2016). “Highly sensitive metabolite biosensor based on organic electrochemical transistor integrated with microfluidic channel and poly(N-vinyl-2-pyrrolidone)-capped platinum nanoparticles”. Advanced Materials Technologies, (Year: 2016).;;Huang, X. et al., Stretchable, Wireless Sensors and Functional Substrates for Epidermal Characterization of Sweat, Small 10, 2014, 3083-3090…	ACTIVE	X
213	US	B1	US 11723564 B1	105-202-304-987-821	45153	2023	US 202117164353 A	44228	US 202117164353 A	44228	Optical sensor light filtering in a wearable device	A compact optical sensor is used to determine heart rate, hemoglobin, hydration, peptides, or oxygen saturation using a light source and a single photodiode. The single photodiode has a first filter and a second filter. The first filter is closer to the light source and is transparent to green light and blocks red light. The second filter is farther from the light source and is transparent to red…	AMAZON TECH INC	SHVERDIN MIRO YAKOV;;KESTELLI NEVZAT AKIN	AMAZON TECHNOLOGIES INC (2021-01-28)	https://lens.org/105-202-304-987-821	Granted Patent	yes	5	0	1	105-202-304-987-821	US	1	105-202-304-987-821	US	0	A61B5/14552;;A61B5/681;;A61B2560/0247;;A61B2560/0406;;A61B2562/0233;;A61B2562/185;;G01J1/0204;;G01J1/0488;;G01J1/0492;;A61B5/14552;;A61B5/0205;;A61B5/02433;;A61B5/332;;A61B5/681;;A61B5/7278;;A61B2562/0238;;A61B2562/043;;A61B2562/185;;G01J3/51	A61B5/1455;;A61B5/00;;A61B5/0205;;A61B5/024;;A61B5/332;;G01J3/51		4	0			“Band-stop filter”, Wikipedia, 4 pages. Retrieved from the Internet: URL: https://en.wikipedia.org/wiki/Band-stop_filter.;;“Flat-Top Comb Filters Data Sheet”, Optoplex Corporation, 2 pgs. Retrieved from the Internet: URL: http://optoplex.com/download/Optoplex%20Flat-Top%20Comb%20Filter%20Brochure_2020EN.pdf.;;“Flat-Top Comb Filters”, Optoplex Corporation, 2 pgs. Retrieved from the Internet: URL: …	ACTIVE	X
214	US	B2	US 11024423 B2	108-774-009-549-32X	44348	2021	US 202017103666 A	44159	US 202017103666 A;;US 201916663915 A	43763	Systems and methods for monitoring health metrics	A method for measuring health metrics of a user is provided. A base of an electronic device is attached to the skin of the user. A housing of the electronic device is attached to the base, such that (i) the housing is secured to the base, and (ii) a window of the housing is positioned outside an opening in the base. One or more sensors within the housing generates first physiological data associa…	ANEXA LABS LLC	REYKHERT ALEXEY	ANEXA LABS LLC (2019-10-30);;BIOTRICITY INC (2025-03-21)	https://lens.org/108-774-009-549-32X	Granted Patent	yes	12	5	9	108-774-009-549-32X;;049-713-332-990-839;;078-230-284-356-694;;085-741-789-054-42X;;157-882-628-285-760;;182-102-495-802-889;;039-232-373-547-77X;;110-841-795-194-51X;;086-258-496-265-932	EP;;US;;WO	9	086-258-496-265-932;;049-713-332-990-839;;078-230-284-356-694;;085-741-789-054-42X;;157-882-628-285-760;;182-102-495-802-889;;039-232-373-547-77X;;110-841-795-194-51X;;108-774-009-549-32X	EP;;US;;WO	0	G16H50/30;;G16H40/63;;A61B5/6831;;A61B5/282;;A61B5/6832;;A61B2560/0443;;A61B5/6833;;A61B5/6838;;A61B5/01;;A61B5/1118;;A61B5/1116;;A61B5/1123;;A61B5/1126;;A61B5/0075;;A61B5/02108;;A61B5/14542;;A61B5/14532;;A61B5/02427;;A61B5/257;;A61B5/332;;A61B5/33;;A61B5/721;;G16H50/30;;G16H40/63;;A61B5/6832;;A61B5/6831;;A61B5/282	G16H40/63;;A61B5/00;;A61B5/282;;G16H50/30		1	0			International Search Report and Written Opinion in International Patent Application No. PCT/US2020/056884, dated Nov. 30, 2020 (11 pages).	ACTIVE	X
215	EP	B1	EP 4103079 B1	043-953-703-984-142	45357	2024	EP 22701714 A	44582	IB 2022050536 W;;US 202117156318 A	44218	PREDICTION OF ADHESIONS BASED ON BIOMARKER MONITORING		CILAG GMBH INT	SHELTON IV FREDERICK E;;HARRIS JASON L;;ECKERT CHAD E		https://lens.org/043-953-703-984-142	Granted Patent	yes	4	0	7	180-785-737-011-717;;071-151-752-961-693;;163-386-435-837-500;;068-384-730-267-018;;043-953-703-984-142;;145-768-701-088-890;;054-159-725-886-78X	CN;;EP;;JP;;US;;WO;;BR	7	180-785-737-011-717;;163-386-435-837-500;;071-151-752-961-693;;068-384-730-267-018;;043-953-703-984-142;;145-768-701-088-890;;054-159-725-886-78X	CN;;EP;;JP;;US;;WO;;BR	0	A61B17/320068;;A61B2017/00017;;A61B18/1442;;A61B34/10;;A61B34/20;;A61B34/25;;A61B2090/502;;A61B2090/365;;A61B17/34;;A61B2017/00818;;A61B2017/00809;;A61B2034/252;;A61B2017/00221;;G16H50/30;;G16H50/20;;A61B2090/365;;A61B5/0205;;A61B5/02405;;A61B5/026;;A61B5/0531;;A61B5/0816;;A61B5/0833;;A61B5/091;;A61B5/1107;;A61B5/14542;;A61B5/14546;;A61B5/4035;;A61B5/41;;A61B5/4266;;A61B5/7275;;A61B17/3421;;A61B2…	A61B18/14;;A61B17/068;;A61B17/32;;A61B17/34;;A61B34/10;;A61B34/20;;A61B90/50;;G16H50/20;;G16H50/30		0	0				ACTIVE	X
217	US	B2	US 11389090 B2	020-105-188-264-928	44761	2022	US 201916718008 A	43816	US 201916718008 A;;US 201916717834 A;;US 201862782291 P	43453	Intermittent monitoring	Various examples are directed to systems and methods for monitoring a patient. For example, patient data of a first type may be monitored with a low-fidelity monitoring technique over a first time period. Patient behavior may be evaluated based on the monitored first type of patient data. Patient data of a second type may be monitored over a second time period with a continuous glucose monitor de…	DEXCOM INC	KAMATH APURV ULLAS;;CRAWFORD MARGARET A;;GRAY JOHN MICHAEL;;HAMPAPURAM HARI;;JOHNSON MATTHEW LAWRENCE;;PAI SUBRAI GIRISH;;SANDERS SHAWN CLAY;;MIKAMI SUMITAKA	DEXCOM INC (2020-02-26)	https://lens.org/020-105-188-264-928	Granted Patent	yes	50	4	18	066-321-876-969-142;;057-191-418-971-289;;080-903-086-386-193;;147-116-017-733-83X;;051-174-794-916-096;;114-009-806-672-733;;135-085-190-236-090;;020-105-188-264-928;;043-910-045-636-364;;137-122-830-775-539;;066-835-017-003-268;;192-243-613-914-34X;;191-412-392-803-264;;145-385-579-056-271;;103-331-920-285-127;;108-409-113-141-265;;056-165-113-196-95X;;026-736-492-587-878	CN;;EP;;JP;;US;;AU;;CA;;WO	24	058-143-266-823-817;;087-171-872-890-868;;199-095-607-175-627;;147-116-017-733-83X;;051-174-794-916-096;;123-933-306-576-77X;;114-009-806-672-733;;135-085-190-236-090;;020-105-188-264-928;;043-910-045-636-364;;137-122-830-775-539;;026-000-543-582-291;;066-835-017-003-268;;192-243-613-914-34X;;191-412-392-803-264;;145-385-579-056-271;;103-331-920-285-127;;056-165-113-196-95X;;108-409-113-141-265;;…	CN;;EP;;JP;;US;;AU;;CA;;WO	0	G16H40/67;;G16H50/30;;G16H20/30;;G16H20/60;;A61M2230/201;;A61M5/1723;;A61M2205/3584;;A61M2205/50;;A61M2205/502;;A61M2205/52;;A61M2230/62;;A61M2230/40;;A61M2230/04;;A61M2230/63;;A61M2205/8206;;A61M2205/3303;;A61M5/14244;;A61B5/0024;;A61B5/02055;;A61B5/14532;;A61B5/7221;;A61B5/7267;;A61B5/7475;;A61B5/1118;;A61B5/14546;;G06F11/1004;;A61B5/14532;;A61B5/14546;;A61B2560/0209;;A61B5/0205;;G16H20/17;;G16…	G16H10/60;;A61B5/00;;A61B5/0205;;A61B5/024;;A61B5/11;;A61B5/145;;A61B5/1455;;A61M5/172;;G06F11/10;;G16H20/17;;G16H40/67		8	0			Extended European Search Report for Application No. 17776704.3 dated Oct. 18, 2019, 09 pages.;;International Preliminary Report on Patentability for Application No. PCT/US2017/025170 dated Oct. 11, 2018, 13 pages.;;International Search Report and Written opinion for Application No. PCT/US2017/025170 dated Jul. 21, 2017, 14 pages.;;Office Action for European Application No. 17776704.3, dated Sep. …	ACTIVE	X
218	US	B2	US 11937946 B2	151-588-184-986-922	45377	2024	US 201916573606 A	43725	US 201916573606 A;;US 201313837748 A;;US 201261710768 P	41189	Wearable cardiac monitor	Systems, methods and devices for reducing noise in cardiac monitoring including wearable monitoring devices having at least one electrode for cardiac monitoring; in some implementations, the wearable device using a composite adhesive having at least one conductive portion applied adjacent the electrode; and, in some implementations, including circuitry adaptations for the at least one electrode t…	RDS	GOLDA GEORGE STEFAN;;MOYER DANIEL VAN ZANDT;;MARRIOTT MARK P;;ELETR SAM;;O'NEIL BRUCE	RDS (2020-08-18);;RHYTHM DIAGNOSTIC SYSTEMS INC (2013-08-30)	https://lens.org/151-588-184-986-922	Granted Patent	yes	473	0	37	016-236-796-929-888;;032-789-051-733-207;;176-125-203-623-462;;039-746-065-837-28X;;047-979-201-304-179;;131-400-632-721-061;;014-943-079-816-637;;151-429-285-024-206;;175-676-133-211-001;;070-591-908-138-971;;098-742-942-358-005;;062-632-179-324-456;;095-351-700-430-839;;085-809-219-265-514;;019-805-855-634-251;;011-097-846-915-881;;110-638-432-807-168;;024-386-727-126-102;;091-923-073-465-180;;…	CN;;EP;;JP;;US;;CA;;WO	82	134-184-385-152-361;;155-848-666-910-297;;134-135-790-963-685;;047-979-201-304-179;;151-429-285-024-206;;176-125-203-623-462;;032-789-051-733-207;;086-498-052-670-876;;077-121-773-249-321;;085-809-219-265-514;;070-591-908-138-971;;095-351-700-430-839;;065-721-469-469-702;;174-297-591-560-165;;019-805-855-634-251;;034-400-264-044-661;;127-563-086-893-377;;091-923-073-465-180;;038-368-533-993-987;;…	CN;;EP;;JP;;ES;;US;;CA;;WO	0	A61B5/0002;;A61B5/0059;;A61B5/0205;;A61B5/02125;;A61B5/02141;;A61B5/0261;;A61B5/0295;;A61B5/08;;A61B5/11;;A61B5/14552;;A61B5/6828;;A61B5/72;;A61B5/7207;;A61B5/721;;A61B5/7214;;A61B5/7275;;A61B5/0006;;A61B5/14551;;A61B5/1118;;A61B5/02438;;A61B2560/0412;;A61B2560/0295;;A61B5/318;;A61B5/282;;A61B5/259;;A61B5/335;;A61B5/352;;A61B5/0006;;A61B5/02438;;A61B5/1118;;A61B2560/0295;;A61B2560/0412;;A61B5/145…	A61B5/00;;A61B5/0205;;A61B5/021;;A61B5/024;;A61B5/026;;A61B5/0295;;A61B5/08;;A61B5/11;;A61B5/1455;;A61B5/259;;A61B5/282;;A61B5/318;;A61B5/335;;A61B5/352		27	3	141-548-458-813-684;;023-286-603-614-329;;029-912-861-844-542	10.1109/jssc.1980.1051404;;10.1109/jssc.2009.2034440;;10.1088/0967-3334/28/3/r01;;17322588	Kansy, Robert J., Response of a Correlated Double Sampling Circuity to 1/f Noise, IEEE Journal of Solid-State Circuits, Jun. 1980, pp. 373-375, vol. SC-15, No. 3, IEEE, New York, NY, USA.;;Supplementary European Search Report for Application No. EP16815429 issued by the European Patent Office, dated Jan. 17, 2019, 4 pages, EPO, Munich, Germany.;;Partial European Search Report for Application No. …	ACTIVE	X
220	US	B2	US 10813575 B2	111-317-962-927-270	44131	2020	US 201414915270 A	41939	CN 2014089569 W	41939	Dynamic blood glucose data acquiring device and host	A dynamic blood glucose data acquiring device and a host are provided, wherein the collecting device comprises a portable host and a probe assembly; the probe assembly includes two glucolase micro electrode needles and a first circuit board; a first electrode terminal is provided on the first circuit board; the host includes an outer shell and a second circuit board which is located in the outer …	GLUTALOR MEDICAL INC	YU DONGFANG	SHENZHEN WAVEGUIDER OPTICAL TELECOM TECHNOLOGY INC (2016-02-22);;GLUTALOR MEDICAL INC (2019-03-03)	https://lens.org/111-317-962-927-270	Granted Patent	yes	8	0	13	093-240-595-368-88X;;153-035-553-178-924;;137-343-557-952-977;;111-317-962-927-270;;073-966-394-297-023;;024-027-100-636-972;;167-447-781-978-682;;057-790-565-062-098;;074-485-002-115-542;;146-190-897-262-990;;136-679-062-128-428;;036-450-890-295-52X;;074-814-879-994-760	DK;;CN;;EP;;JP;;ES;;US;;WO	13	093-240-595-368-88X;;153-035-553-178-924;;137-343-557-952-977;;111-317-962-927-270;;073-966-394-297-023;;024-027-100-636-972;;167-447-781-978-682;;057-790-565-062-098;;074-485-002-115-542;;146-190-897-262-990;;136-679-062-128-428;;036-450-890-295-52X;;074-814-879-994-760	DK;;CN;;EP;;JP;;ES;;US;;WO	0	A61B5/14532;;A61B5/0004;;A61B5/14865;;A61B5/6833;;A61B5/685;;A61B2560/0412;;A61B2560/0443;;A61B2562/0217;;A61B2562/164;;A61B5/14532;;A61B5/0004;;A61B5/14865;;A61B5/6833;;A61B5/685;;A61B5/72;;A61B2562/08	A61B5/145;;A61B5/00;;A61B5/1486		1	0			International Search Report of PCT Patent Application No. PCT/CN2014/089569 dated Jul. 17, 2015.	ACTIVE	X
221	US	B1	US 10046114 B1	113-165-382-729-959	43326	2018	US 201514719980 A	42146	US 201514719980 A	42146	Control of a peripheral device with a bandage-type analyte sensor	An example system includes a flexible substrate configured to be mounted to a skin surface. The system includes a sensor probe that has a first end attached to the flexible substrate and a second end configured to extend beneath the skin surface to contact interstitial fluid. A sensor is configured to measure a physiological property and is disposed at the second end of the sensor probe. A transm…	VERILY LIFE SCIENCES LLC	BIEDERMAN WILLIAM JAMES;;OTIS BRIAN;;WASSON JACLYN LEVERETT;;LIU ZENGHE	GOOGLE INC (2015-05-22);;VERILY LIFE SCIENCES LLC (2015-08-05)	https://lens.org/113-165-382-729-959	Granted Patent	yes	9	46	2	148-294-781-398-801;;113-165-382-729-959	US	2	148-294-781-398-801;;113-165-382-729-959	US	0	A61M5/1723;;A61B5/0024;;A61B5/1451;;A61B5/14532;;A61B5/1473;;A61B2562/164;;A61M5/1723;;A61B5/0024;;A61B5/1451;;A61B5/14532;;A61B5/1473;;A61B2562/164	A61M5/172;;A61B5/00;;A61B5/145;;A61B5/1473		5	0			Dexcom G4 Platform, Continuous Glucose Monitoring System, Quick Start Guide, Dexcom, Inc. copyright 2013, 2 pages.;;Dexcom G4 Platform Professional, Professional Continuous Glucose Monitoring System, User's Guide, Dexcom, Inc. copyright 2014, 258 pages.;;Medtronic with Guardian Real-Time Continuous Glucose Monitoring-Getting Started, Medtronic MiniMed, Inc., copyright 2009, 28 pages.;;Medtronic G…	ACTIVE	X
222	US	B2	US 11484234 B2	106-814-637-872-989	44866	2022	US 202217834004 A	44719	US 202217834004 A;;US 202117556894 A;;US 202117328768 A;;US 202017097022 A;;US 201715604648 A;;US 201414285575 A;;US 201213544934 A;;US 24282308 A	39721	Optimizing analyte sensor calibration	Method and apparatus for optimizing analyte sensor calibration including receiving a current blood glucose measurement, retrieving a time information for an upcoming scheduled calibration event for calibrating an analyte sensor, determining temporal proximity between the current blood glucose measurement and the retrieved time information for the upcoming calibration event, initiating a calibrati…	ABBOTT DIABETES CARE INC	BUDIMAN ERWIN SATRYA;;HARPER WESLEY SCOTT;;DUNN TIMOTHY CHRISTIAN	ABBOTT DIABETES CARE INC (2009-03-13)	https://lens.org/106-814-637-872-989	Granted Patent	yes	1189	1	23	199-387-633-925-131;;179-115-475-477-972;;008-663-793-355-598;;162-649-862-984-746;;111-052-136-609-915;;024-357-717-362-459;;101-101-795-981-898;;004-953-788-350-303;;065-854-447-956-138;;156-441-077-028-265;;106-814-637-872-989;;007-014-197-181-476;;050-729-191-703-219;;009-512-662-729-535;;092-059-515-332-527;;143-684-439-200-179;;117-895-855-393-501;;045-653-727-568-053;;079-575-282-311-927;;…	EP;;US;;WO	336	037-380-145-124-865;;110-536-529-664-346;;140-417-409-776-454;;144-042-740-522-953;;123-084-765-808-425;;192-820-036-420-91X;;125-150-898-567-640;;129-974-591-351-666;;008-547-766-304-308;;056-713-812-570-394;;164-272-697-852-859;;079-128-793-502-202;;004-127-361-302-949;;119-262-823-122-726;;042-977-930-930-507;;066-777-643-737-207;;055-330-263-339-274;;093-526-869-891-349;;114-299-288-981-285;;…	DK;;CN;;EP;;LT;;JP;;ES;;US;;AU;;CA;;FI;;WO;;IL	0	A61B5/14532;;A61B5/1495;;A61B5/14532;;A61B5/1495;;A61B5/7221	A61B5/1495;;A61B5/00;;A61B5/145		144	76	030-155-762-644-019;;068-536-985-004-738;;052-356-140-149-389;;009-259-102-370-919;;004-510-877-389-207;;082-626-907-191-554;;090-348-305-613-628;;081-249-097-078-543;;078-354-084-865-19X;;007-549-562-816-54X;;003-690-143-043-420;;103-273-155-548-977;;007-500-825-916-378;;154-074-007-186-079;;022-304-621-280-326;;051-750-708-397-190;;061-786-187-274-992;;126-645-248-443-639;;088-345-548-139-259;;…	10.2337/diab.39.12.1519;;2245876;;10.2337/diabetes.39.12.1519;;pmc2769645;;19885107;;10.1177/193229680700100402;;10.1089/15209150252924058;;12017416;;10.1007/s11892-003-0068-z;;12762970;;14578298;;10.2337/diabetes.52.11.2790;;10.1089/15209150152607196;;11762520;;10.1016/0265-928x(87)80012-3;;10.1021/ac00268a018;;6721151;;12392950;;10.1016/s0956-5663(02)00093-3;;12450441;;10.1089/15209150232079822…	U.S. Appl. No. 12/242,823 (U.S. Pat. No. 8,219,173), filed Sep. 30, 2008 (Jul. 10, 2012).;;U.S. Appl. No. 13/544,934 (U.S. Pat. No. 8,744,547), filed Jul. 9, 2012 (Jun. 3, 2014).;;U.S. Appl. No. 14/285,575 (U.S. Pat. No. 9,662,056), filed May 22, 2014 (May 30, 2017).;;U.S. Appl. No. 15/604,648 (US 2017/0258379), filed May 24, 2017 (Sep. 14, 2017).;;U.S. Appl. No. 17/097,022 (U.S. Pat. No. 11,013,…	ACTIVE	X
223	US	B2	US 11363974 B2	113-066-765-138-415	44733	2022	US 201916426913 A	43615	SE 1850652 A	43250	Method and device for blood glucose level monitoring	A method for monitoring a blood glucose level of an individual comprises the steps of receiving (S1) a first glucose value, which has been measured in a body fluid of the individual other than the individual's blood, the first glucose value representing the blood glucose level of the individual with a first delay; receiving (S6) speech of the individual; analyzing (S7) the individual's speech; an…	SONY MOBILE COMMUNICATIONS INC;;SONY GROUP CORP	RASMUSSON JIM;;KARLSSON PETER C;;SVENSSON MAGNUS;;NILSSON CLAES;;EKLUND JIMMY	SONY GROUP CORPORATION (2019-03-25);;SONY MOBILE COMMUNICATIONS INC (2018-06-02)	https://lens.org/113-066-765-138-415	Granted Patent	yes	16	0	4	134-855-548-484-227;;113-066-765-138-415;;107-130-926-079-978;;062-294-529-035-189	EP;;US	4	134-855-548-484-227;;062-294-529-035-189;;107-130-926-079-978;;113-066-765-138-415	EP;;US	0	A61B5/14532;;A61B5/1451;;A61B5/4803;;A61B5/14532;;A61B5/4803;;A61B5/681;;A61B5/6822;;A61B5/6824;;A61B5/6831;;A61B5/72;;A61B5/7282	A61B5/145;;A61B5/00		6	0			Machine translation of Saeltzer et al. (DE 102015218948 A1) (Year: 2022).;;European Search Report for corresponding European Patent Application No. 19 17 1632 dated Oct. 16, 2019.;;European Search Opinion for corresponding European Patent Application No. 19 171 632.3.;;Audrey Farley, Speech Recognition Software Improves Bolus Calculation, Another Study Suggest, http://insulinnation.com/treatment/…	ACTIVE	X
224	US	B2	US 10588562 B2	045-497-016-679-281	43907	2020	US 201816022025 A	43279	US 201816022025 A	43279	Detecting allergic reaction and alerting a guardian device	A method for detecting allergic reaction and alerting a guardian device includes registering a wearable device to associate the wearable device with the guardian device. The wearable device then monitors vital signs to determine whether the vital signs are within an acceptable range. Based on the vital signs being outside the acceptable range, the wearable device sends an alert to the guardian de…	AETNA INC	GANESAN SRIRAM	AETNA INC (2018-06-24)	https://lens.org/045-497-016-679-281	Granted Patent	yes	4	4	4	089-862-197-614-784;;045-497-016-679-281;;052-831-065-654-86X;;119-397-355-939-265	US	4	089-862-197-614-784;;045-497-016-679-281;;052-831-065-654-86X;;119-397-355-939-265	US	0	G08B25/005;;A61B5/0022;;A61B5/0024;;A61B5/02055;;A61B5/411;;A61B5/681;;A61B5/746;;A61B2503/06;;G08B21/0211;;G08B21/0236;;G08B21/0269;;A61B5/411;;A61B5/0022;;A61B5/02055;;A61B5/021;;A61B5/024;;A61B5/0816;;A61B5/14552;;A61B5/746;;G08B21/0211;;G08B21/0236;;G08B21/0269	A61B5/00;;A61B5/0205;;A61B5/021;;A61B5/024;;A61B5/08;;A61B5/1455;;G08B21/02		0	0				ACTIVE	X
225	US	B2	US 11445974 B2	032-533-301-146-314	44824	2022	US 201715653067 A	42934	EP 2015050855 W	42023	System and method for adjusting the blood glucose level of a person	A system for adjusting blood glucose level including an insulin delivery device configured to release insulin into the body of a person, and an EEG monitor having an EEG sensing part including EEG electrodes. The EEG monitor can be arranged in the ear region of the person with the EEG sensing part arranged subcutaneously at the scalp or arranged in the ear canal. The EEG monitor includes an EEG s…	T&W ENG A/S	JENSEN RASMUS STIG;;TOPHOLM RICHARD;;CHRISTENSEN ERIK SKOV;;MADSEN RASMUS ELSBORG	T&W ENGINEERING A/S (2017-06-13)	https://lens.org/032-533-301-146-314	Granted Patent	yes	18	2	14	018-987-830-529-977;;019-295-134-022-944;;178-951-946-850-188;;017-094-852-322-526;;184-318-929-563-607;;032-533-301-146-314;;090-043-383-547-470;;042-308-174-997-598;;035-228-459-744-312;;099-726-138-811-960;;150-998-820-792-500;;007-917-387-206-133;;012-521-034-893-185;;116-984-040-572-865	DK;;CN;;KR;;EP;;JP;;US;;CA;;AU;;SG;;WO	14	018-987-830-529-977;;019-295-134-022-944;;178-951-946-850-188;;017-094-852-322-526;;184-318-929-563-607;;032-533-301-146-314;;090-043-383-547-470;;042-308-174-997-598;;035-228-459-744-312;;099-726-138-811-960;;150-998-820-792-500;;007-917-387-206-133;;012-521-034-893-185;;116-984-040-572-865	DK;;CN;;KR;;EP;;JP;;US;;CA;;AU;;SG;;WO	0	A61M5/1723;;A61B5/150022;;A61B5/15087;;A61B5/150877;;A61B5/155;;A61B5/157;;A61M5/14244;;A61M5/14276;;A61B5/4839;;A61B5/14532;;A61B5/150022;;A61B5/15087;;A61B5/150877;;A61B5/155;;A61B5/157;;A61B5/369;;A61M5/14244;;A61M5/14276;;A61M5/1723;;A61B5/369;;A61B5/14532;;A61B5/291;;A61B5/4839;;A61M5/14244;;A61M5/14276;;A61M5/1723;;A61B5/4839;;A61B5/14532;;A61B5/150022;;A61B5/15087;;A61B5/150877;;A61B5/155;…	A61B5/00;;A61B5/145;;A61B5/15;;A61B5/155;;A61B5/157;;A61B5/291;;A61B5/369;;A61M5/142;;A61M5/172		7	0			Communication dated Jul. 3, 2018 from the Japanese Patent Office in counterpart application No. 2017-537476.;;International Search Report of PCT/EP2015/050855, dated Sep. 22, 2015. [PCT/ISA/210].;;Written Opinion of PCT/EP2015/050855, dated Sep. 22, 2015. [PCT/ISA/237].;;Communication dated Feb. 28, 2019, from the Canadian Intellectual Property Office in corresponding Application No. 2,973,275.;;…	ACTIVE	X
226	US	B2	US 11896402 B2	176-256-902-221-833	45335	2024	US 202217985287 A	44876	US 202217985287 A;;KR 20180143463 A;;US 201916689258 A	43424	Electronic device and method for obtaining information regarding blood glucose of user	An electronic device may include a housing and a PhotoPlethysmoGram (PPG) sensor disposed inside the housing. The PPG sensor may include a first Light Emitting Diode (LED) configured to generate light in a first wavelength band, a second LED configured to generate light in a second wavelength band, a third LED configured to generate light in a third wavelength band, a fourth LED configured to gen…	SAMSUNG ELECTRONICS CO LTD	SEO HYEJUNG;;KIM MINJI;;KIM JINHO;;JEON TAEHAN;;PARK JEONGMIN		https://lens.org/176-256-902-221-833	Granted Patent	yes	39	0	11	009-891-416-481-573;;182-428-073-345-067;;108-497-155-326-981;;021-212-266-254-160;;065-804-198-212-385;;170-403-135-764-536;;007-512-903-653-445;;176-256-902-221-833;;134-731-892-307-276;;109-658-242-856-906;;096-193-436-147-14X	CN;;KR;;EP;;US;;WO	11	009-891-416-481-573;;065-804-198-212-385;;108-497-155-326-981;;021-212-266-254-160;;182-428-073-345-067;;170-403-135-764-536;;007-512-903-653-445;;176-256-902-221-833;;134-731-892-307-276;;109-658-242-856-906;;096-193-436-147-14X	CN;;KR;;EP;;US;;WO	0	A61B5/14532;;A61B2562/046;;A61B5/681;;A61B5/742;;A61B5/443;;A61B2562/0238;;A61B5/7278;;A61B5/14552;;A61B5/7475;;A61B5/055;;A61B5/14532;;A61B5/14551;;A61B5/0059;;A61B5/02416;;A61B5/7278;;A61B5/14532;;A61B5/681;;A61B5/14552;;A61B2562/046;;A61B5/742;;A61B5/02433;;A61B2562/0238;;A61B5/443	A61B5/00;;A61B5/024;;A61B5/145;;A61B5/1455		7	2	016-830-529-485-751;;012-000-020-820-408	10.1117/1.2844710;;18315375;;24589959	George Zionis, Aikaterini Dimou, Ioannis Bassukas, Dimitrios Galaris, Aygyrios Tsolakidis, Efthimios Kaxiras, “Melanin absorption spectroscopy: new method for noninvasive skin investigation and melanoma detection”, Journal of Biomedical Optics 13(1), 014017 (Year: 2008).;;Lowndes; “Blood interference in fluorescence spectrum Experiment, analysis and comparison with intraoperative measurements on …	ACTIVE	X
228	US	B2	US 12042252 B2	049-801-922-086-081	45496	2024	US 202318447121 A	45147	US 202318447121 A;;US 202117207441 A;;US 202063056925 P;;US 202063106273 P;;US 202063065961 P;;US 202063010669 P;;US 202062992808 P;;US 202063049478 P;;US 202062992779 P	43910	Remote patient management and monitoring systems and methods	Systems and methods are provided for remote patient management and monitoring. The patient is monitored with a wireless sensor system connected to an application executing on a patient user computing device. The system continuously monitors physiological parameters, such as, but not limited to, blood oxygen saturation (SpO2), pulse rate, perfusion index, pleth variability index, and/or respiratio…	MASIMO CORP	AHMED OMAR;;BARKER NICHOLAS EVAN;;INDORF KEITH WARD;;CHA SUNGWHAN;;FREY SEBASTIAN T;;CHO HYEJIN	MASIMO CORPORATION (2018-02-08)	https://lens.org/049-801-922-086-081	Granted Patent	yes	755	1	25	104-876-719-755-445;;049-801-922-086-081;;104-453-693-074-910;;024-294-457-995-528;;097-024-293-366-570;;055-241-166-359-674;;139-486-566-550-030;;006-039-666-759-184;;089-936-907-151-665;;089-911-725-911-992;;132-768-725-230-095;;154-138-801-357-795;;117-215-457-156-111;;101-302-223-133-173;;109-581-065-048-47X;;002-164-086-645-436;;067-210-634-146-666;;069-601-482-840-093;;120-442-836-808-325;;…	KR;;EP;;JP;;US;;WO	25	104-876-719-755-445;;049-801-922-086-081;;104-453-693-074-910;;097-024-293-366-570;;024-294-457-995-528;;055-241-166-359-674;;139-486-566-550-030;;006-039-666-759-184;;089-936-907-151-665;;089-911-725-911-992;;117-215-457-156-111;;154-138-801-357-795;;067-210-634-146-666;;101-302-223-133-173;;109-581-065-048-47X;;132-768-725-230-095;;002-164-086-645-436;;069-601-482-840-093;;120-442-836-808-325;;…	KR;;EP;;JP;;US;;WO	0	G16H40/67;;A61B5/0008;;A61B5/6833;;A61B5/01;;A61B2560/0242;;A61B2562/166;;A61B2560/0214;;G01K13/20;;G16H50/80;;A61B5/0205;;A61B5/746;;A61B2562/0219;;A61B5/4839;;A61B5/01;;A61B5/0008;;A61B5/746;;A61B5/6833;;G16H40/67;;G16H50/80;;A61B2560/0214;;A61B2560/0242;;A61B2562/0271;;A61B2562/0219;;A61B2562/166;;A61B5/0004;;A61B5/002;;A61B5/02055;;A61B5/0816;;A61B5/14542;;A61B5/6814;;A61B5/6823;;A61B5/6824;;…	A61B5/00;;A61B5/01;;A61B5/0205;;A61B5/024;;A61B5/026;;A61B5/08;;A61B5/145;;A61B5/1455;;G06F3/04842;;G06F9/451;;G16H10/60;;G16H15/00;;G16H40/20;;G16H40/67;;G16H50/20;;G16H50/30;;G16H50/70;;G16H50/80;;H04B17/318;;H04W4/021		19	3	091-474-969-977-911;;085-628-959-412-177;;024-441-279-629-679	30626717;;10.1126/scitranslmed.aau8914;;10.1109/aeect.2013.6716427;;10.1186/s40779-020-0233-6;;32029004;;pmc7003341	US 2022/0192529 A1, 06/2022, Al-Ali et al. (withdrawn);;A “Second Chance” to Prevent Opioid Deaths, Technology Networks, Informatics News, This App Uses Sonar to Detect Opioid Overdoses, University of Washington, Jan. 10, 2019, in 3 pages, https://www.technologynetworks.com/informatics/news/a-second-chance-to-prevent-opioid-deaths-313744.;;Announcing the Winner of the 2016 FDA Naloxone APP Compet…	ACTIVE	X
229	EP	B1	EP 3893732 B1	108-689-446-139-023	45476	2024	EP 19839255 A	43812	EP 18212723 A;;EP 2019085198 W	43448	DEVICE FOR USE IN DETERMINING A HYDRATION LEVEL OF SKIN		KONINKLIJKE PHILIPS NV	VARGHESE BABU;;EZERSKAIA ANNA		https://lens.org/108-689-446-139-023	Granted Patent	yes	3	0	9	037-624-135-894-194;;110-365-103-257-184;;179-750-192-979-916;;177-810-112-283-687;;181-497-561-305-358;;052-267-864-650-633;;024-490-130-431-251;;108-689-446-139-023;;077-824-873-778-053	CN;;EP;;JP;;US;;WO;;BR	9	037-624-135-894-194;;110-365-103-257-184;;179-750-192-979-916;;177-810-112-283-687;;181-497-561-305-358;;052-267-864-650-633;;024-490-130-431-251;;108-689-446-139-023;;077-824-873-778-053	CN;;EP;;JP;;US;;WO;;BR	0	A61B5/0082;;A61B5/443;;A61B5/4875;;A61B5/0082;;A61B5/443;;A61B5/4875;;A61B5/7278;;A61B2562/0233;;A61B2576/02	A61B5/00		0	0				ACTIVE	X
231	US	B2	US 11642055 B2	043-307-522-541-282	45055	2023	US 202217892707 A	44795	US 202217892707 A;;US 202217592216 A;;US 202117446279 A;;US 201615387088 A;;US 201662412100 P;;US 201562272983 P	42368	Transcutaneous analyte sensor systems and methods	Systems for applying a transcutaneous monitor to a person can include a telescoping assembly, a sensor, and a base with adhesive to couple the sensor to skin. The sensor can be located within the telescoping assembly while the base protrudes from a distal end of the system. The system can be configured to couple the sensor to the base by compressing the telescoping assembly.	DEXCOM INC	HALAC JASON;;GRAY JOHN MICHAEL;;ENGLAND JUSTEN DEERING;;NEALE PAUL V;;BLACKWELL JENNIFER;;WELLS MARIA NOEL BROWN;;PIRONDINI KENNETH	DEXCOM INC (2017-02-07)	https://lens.org/043-307-522-541-282	Granted Patent	yes	269	1	82	014-904-436-002-243;;188-331-908-375-14X;;151-835-924-137-105;;038-129-473-721-737;;194-250-952-496-750;;030-639-174-319-683;;129-535-095-227-338;;191-731-132-830-897;;167-173-933-549-719;;062-242-208-579-295;;162-295-492-702-717;;131-703-302-258-471;;118-682-753-342-567;;153-625-935-627-908;;110-034-256-537-527;;166-029-418-515-853;;021-611-888-815-848;;179-388-459-535-486;;141-959-967-297-864;;…	CN;;DK;;EP;;JP;;ES;;US;;AU;;CA;;DE;;WO;;HU	82	014-904-436-002-243;;188-331-908-375-14X;;151-835-924-137-105;;038-129-473-721-737;;194-250-952-496-750;;030-639-174-319-683;;131-703-302-258-471;;191-731-132-830-897;;167-173-933-549-719;;062-242-208-579-295;;162-295-492-702-717;;129-535-095-227-338;;118-682-753-342-567;;153-625-935-627-908;;110-034-256-537-527;;166-029-418-515-853;;021-611-888-815-848;;179-388-459-535-486;;141-959-967-297-864;;…	CN;;DK;;EP;;JP;;ES;;US;;AU;;CA;;DE;;WO;;HU	0	A61B5/14865;;A61B5/14503;;A61B5/14532;;A61B5/6849;;A61B2560/063;;A61B5/68335;;A61B2560/063;;A61B5/6849;;A61B5/14865;;A61B5/68335;;A61B5/14532;;A61B5/14503;;A61B2560/045;;A61B2562/227;;A61B2562/222;;A61B5/68335;;A61B5/14865;;A61B5/6849;;A61B2560/063;;A61B5/14546;;A61B5/6848;;A61B5/688;;A61B5/6832;;A61B5/14532	A61B5/1486;;A61B5/00;;A61B5/145		2	0			International Preliminary Report on Patentability for Application No. PCT/US2016/068102 dated Jul. 12, 2018, 08 pages.;;International Search Report and Written Opinion for Application No. PCT/US2016/068102 dated May 18, 2017, 10 pages.	ACTIVE	X
233	US	B1	US 11717232 B1	136-225-367-649-033	45146	2023	US 202016829846 A	43915	US 202016829846 A	43915	Devices, systems, and methods for predictive analytics for chronic health condition management	Systems, methods, and devices of a health device network may include: a non-invasive glucometer that non-invasively measures analyte levels; an invasive glucometer communicatively coupled directly to the non-invasive glucometer; a cloud-based server communicatively coupled to the non-invasive glucometer or the invasive glucometer; a user device communicatively coupled to the cloud-based server; a…	TULA HEALTH INC	MILLER DAVID;;MILLER DEVIN;;JONES MICHAEL;;DERRICK DAVID	TULA HEALTH INC (2021-04-14);;JRE STAR INVESTMENT HOLDINGS LLC (2024-02-15)	https://lens.org/136-225-367-649-033	Granted Patent	yes	18	1	1	136-225-367-649-033	US	1	136-225-367-649-033	US	0	A61B5/681;;A61B5/14532;;A61B5/1455;;A61B5/150969;;A61B5/155;;A61B5/157;;A61B5/7275;;A61B2562/0233;;G16H10/20;;G16H40/63;;G16H40/67;;G16H50/70;;A61B5/7275;;A61B5/002;;A61B5/0022;;A61B5/0205;;A61B5/021;;A61B5/024;;A61B5/1118;;A61B5/14532;;A61B5/14551;;A61B5/151;;A61B5/443;;A61B5/4875;;A61B5/7246;;A61B5/7267;;A61B5/742;;A61B5/746;;A61B2562/0242;;G16H10/40;;G16H50/30	A61B5/00;;A61B5/0205;;A61B5/021;;A61B5/024;;A61B5/11;;A61B5/145;;A61B5/1455;;A61B5/151;;G16H10/40;;G16H50/30		0	0				ACTIVE	X
234	US	B2	US 9986979 B2	047-501-001-236-375	43256	2018	US 201013202038 A	40228	CA 2655017 A;;CA 2010000235 W	39864	Non-invasive biomedical detection and monitoring systems	The present disclosure relates to a non-invasive and continuous biomedical detections and non-invasive and continuous monitoring methods and devices for extracting and analyzing interstitial fluid extracted non-invasively and continuously from the skin of a subject comprising non-invasively electroporating the skin using a non pulsed voltage in combination with a pulsed voltage and applying negat…	ESSALIK ABDELTIF;;DUSSAULT ANDRE;;ESSALIK JALALEDDINE;;INVAFREE HMS INC	ESSALIK ABDELTIF;;DUSSAULT ANDRÉ;;ESSALIK JALALEDDINE	INVAFREEHMS INC (2011-08-05);;6976514 CANADA INC (2018-05-18);;ESSALIK ABDELTIF (2018-02-26);;KIFFIK INC (2019-04-16)	https://lens.org/047-501-001-236-375	Granted Patent	yes	18	4	13	090-541-978-777-154;;161-032-724-898-94X;;047-501-001-236-375;;114-389-312-356-842;;171-978-693-665-755;;066-075-182-085-931;;197-193-522-053-897;;099-113-936-547-330;;169-874-363-519-079;;043-190-193-403-420;;182-872-806-836-412;;090-601-269-989-682;;199-643-026-004-12X	CN;;EP;;JP;;MA;;US;;CA;;AU;;WO	13	090-541-978-777-154;;161-032-724-898-94X;;047-501-001-236-375;;114-389-312-356-842;;171-978-693-665-755;;066-075-182-085-931;;197-193-522-053-897;;099-113-936-547-330;;169-874-363-519-079;;043-190-193-403-420;;182-872-806-836-412;;090-601-269-989-682;;199-643-026-004-12X	CN;;EP;;JP;;MA;;US;;CA;;AU;;WO	0	A61B10/0045;;A61B5/14514;;A61B5/14532;;A61B5/14546;;A61B5/150022;;A61B5/150099;;A61B5/150221;;A61B5/150229;;A61B5/15087;;A61B5/150954;;A61B5/15134;;A61B5/155;;A61B18/14;;A61B2010/008;;A61B2018/00613;;A61N1/0412;;A61N1/0424;;A61N1/327;;C12Q1/006;;A61B10/0045;;A61B5/14514;;A61B5/14532;;A61B5/14546;;A61B5/150022;;A61B5/150099;;A61B5/150221;;A61B5/150229;;A61B5/15087;;A61B5/150954;;A61B5/15134;;A61B5…	A61B5/05;;A61B5/145;;A61B5/15;;A61B5/151;;A61B5/155;;A61B10/00;;A61B18/00;;A61B18/14;;A61N1/04;;A61N1/32;;C12Q1/00		4	1	022-669-320-861-129	21103304;;10.5009/gnl.2010.4.s1.s99;;pmc2989557	DermaWave Systems History, 2007.;;501(k) Summary Statement for the DermaWave 5000 Combi Max System, Mar. 17, 2004.;;International Search Report for PCT/CA2010/000235.;;Lee et al., 2010, Gut and Liver, 4(suppl. 1): S99-S104.	ACTIVE	X
235	US	B2	US 11129556 B2	062-281-048-606-777	44467	2021	US 201616065817 A	42732	US 201616065817 A;;US 201562273517 P;;US 201662349681 P;;US 201662372341 P;;IL 2016051386 W	42369	Device, system and method for non-invasive monitoring of physiological measurements	System and method for non-invasive monitoring of physiological measurements of a subject, including at least one monitoring device, to detect changes in measured physiological signals, the monitoring device including at least one measuring unit, wherein each measuring unit includes: at least two light emitting sources, and at least one sensor, to detect light beams emitted from the at least two l…	WEAR2B LTD	BASHAN OHAD;;BASHAN ODED;;KLEIN AHARON;;DEKEL BEN ZION	WEAR2B LTD (2018-06-26)	https://lens.org/062-281-048-606-777	Granted Patent	yes	55	0	17	135-976-827-207-967;;112-981-590-175-064;;079-204-802-676-012;;000-900-554-217-847;;056-825-406-176-160;;000-335-724-331-177;;044-351-587-186-036;;028-663-220-016-199;;117-865-112-806-961;;029-429-310-530-053;;109-985-533-290-816;;124-136-263-114-480;;088-974-542-963-580;;037-186-085-330-253;;062-281-048-606-777;;063-456-249-352-804;;030-245-053-862-733	CN;;EP;;JP;;US;;AU;;CA;;IL;;WO	17	135-976-827-207-967;;112-981-590-175-064;;079-204-802-676-012;;056-825-406-176-160;;044-351-587-186-036;;000-900-554-217-847;;000-335-724-331-177;;028-663-220-016-199;;117-865-112-806-961;;029-429-310-530-053;;037-186-085-330-253;;124-136-263-114-480;;109-985-533-290-816;;088-974-542-963-580;;062-281-048-606-777;;063-456-249-352-804;;030-245-053-862-733	CN;;EP;;JP;;US;;AU;;CA;;IL;;WO	0	A61B5/6843;;A61B5/0075;;A61B5/1075;;A61B5/14551;;A61B5/441;;A61B5/489;;A61B5/0002;;A61B5/14532;;A61B5/14546;;A61B5/14558;;A61B5/684;;A61B5/746;;A61B8/0858;;A61B2560/0223;;A61B2562/0204;;A61B2562/0238;;A61B2562/0247;;A61B2562/043;;A61B5/00;;A61B2562/0204;;A61B5/0002;;A61B5/14546;;A61B5/489;;A61B8/0858;;A61B2562/0238;;A61B5/0075;;A61B5/14551;;A61B5/684;;A61B2562/0247;;A61B5/1075;;A61B5/14558;;A61B5…	A61B5/1455;;A61B5/00;;A61B5/107;;A61B5/145;;A61B8/08		10	0			CN Office Action from corresponding CN Appl No. 2016800817753, dated Aug. 5, 2020.;;Notice of Allowance of U.S. Appl. No. 15/644,855, dated Feb. 19, 2020.;;International Search Report of Application No. PCT/IL2016/051386 dated Apr. 4, 2017.;;PCT International Search Report and Written Opinion from corresponding PCT Appl No. PCT/IL2018/050748, dated Dec. 13, 2018.;;Office Action from corresponding…	ACTIVE	X
236	US	B2	US 10357191 B2	027-314-584-586-625	43669	2019	US 201414775693 A	41708	US 201414775693 A;;US 201361782148 P;;US 2014/0022637 W	41347	Continuous glucose monitoring on-body sensor	An on-body sensor (OBS) (5610) having a continuous monitoring (CGM) device is disclosed for use in identifying an analyte, such as glucose in blood or interstitial fluid (ISF), using a biomaterial, such as glucose binding protein (GBP), that is brought into contact with the analyte. The on-body sensor (5610) incorporating the CGM device includes a housing (5625′) which provides protection to the …	BECTON DICKINSON CO	DI RESTA ELLEN;;PRUDDEN JOHN;;SALEMME JAMES;;GUNDLACH JACK;;SULLIVAN TREACY ANN;;LINNANE JENNIFER	EMBECTA CORP (2022-03-31);;BECTON DICKINSON AND COMPANY (2019-06-09)	https://lens.org/027-314-584-586-625	Granted Patent	yes	24	3	19	032-289-300-105-252;;003-997-508-801-981;;161-124-248-569-974;;098-680-352-102-121;;061-083-287-173-91X;;075-801-994-356-143;;007-252-251-676-271;;055-704-534-636-670;;114-155-417-585-703;;100-902-094-829-352;;114-852-060-579-004;;072-183-682-571-237;;159-971-837-140-012;;070-460-278-290-249;;177-908-446-562-796;;126-677-672-072-079;;016-484-476-683-949;;027-314-584-586-625;;149-716-380-290-342	CN;;EP;;JP;;ES;;US;;CA;;WO	19	032-289-300-105-252;;003-997-508-801-981;;161-124-248-569-974;;098-680-352-102-121;;061-083-287-173-91X;;075-801-994-356-143;;007-252-251-676-271;;055-704-534-636-670;;114-155-417-585-703;;100-902-094-829-352;;114-852-060-579-004;;072-183-682-571-237;;159-971-837-140-012;;070-460-278-290-249;;126-677-672-072-079;;177-908-446-562-796;;016-484-476-683-949;;027-314-584-586-625;;149-716-380-290-342	CN;;EP;;JP;;ES;;US;;CA;;WO	0	A61B5/6833;;A61B5/14532;;A61B5/6832;;A61B5/68335;;A61B5/6848;;A61B5/1459;;A61B5/14532;;A61B5/6832;;A61B5/6833;;A61B5/68335;;A61B5/6848	A61B5/1459;;A61B5/00;;A61B5/145		1	0			Medtronic, “A Practical Guide to Continuous Glucose Monitoring.” Dec. 2011, pp. 11-12 [online]. Retrieved on Jun. 21, 2014 from http://www.medtronic-diabetes.com.au/wcm/groups/mdtcom_sg/@mdt/@ap/@au/@diabetes/documents/documents/contrib_107974.pdf.	ACTIVE	X
237	US	B2	US 11207008 B2	166-523-110-375-907	44558	2021	US 201716492541 A	43059	CN 2017094762 W;;CN 2017111938 W	42943	Method and system for detecting the oxygen saturation within the blood	The present disclosure provides a system and method for analyzing a physiological parameter of a vital sign signal. The method may include acquiring a vital sign signal, storing data, computing and analyzing, processing, and outputting a result. The system may compute and analyze the physiological parameter of the vital sign signal, especially a blood oxygen saturation, via a plurality of algorit…	VITA COURSE TECH HAINAN CO LTD	LU YING;;WEI CHUANMIN;;ZHAO JIWEI;;PENG HENG;;DENG ZIMING;;HUANG ZIJIAN;;WANG ZHIYONG	CHENGDU ZHIGUAN TECHNOLOGY CO. LTD (2025-01-13);;VITA-COURSE TECHNOLOGIES (HAINAN) CO. LTD (2018-01-10)	https://lens.org/166-523-110-375-907	Granted Patent	yes	35	0	10	154-822-944-374-403;;001-347-125-088-851;;105-536-778-500-149;;158-968-257-024-185;;166-523-110-375-907;;122-522-442-347-928;;045-950-584-362-955;;083-914-651-931-979;;160-232-949-624-202;;096-351-766-970-682	CN;;US;;WO	10	154-822-944-374-403;;122-522-442-347-928;;166-523-110-375-907;;105-536-778-500-149;;158-968-257-024-185;;045-950-584-362-955;;001-347-125-088-851;;083-914-651-931-979;;160-232-949-624-202;;096-351-766-970-682	CN;;US;;WO	0	A61B5/0022;;A61B5/02;;A61B5/021;;A61B5/145;;A61B5/1455;;A61B5/318;;A61B5/6802;;G16H40/67;;A61B5/14551;;A61B5/0022;;A61B5/021;;A61B5/02125;;A61B5/02416;;A61B5/6802;;A61B5/7257;;A61B5/726;;A61B5/7271;;A61B5/7275;;A61B5/7475;;G16H10/60;;G16H40/67;;G16H50/20;;G16H50/30;;G16H50/70	A61B5/1455;;A61B5/00;;A61B5/021;;A61B5/024;;A61B5/318;;G16H10/60;;G16H40/67;;G16H50/20;;G16H50/30;;G16H50/70		10	0			International Search Report in International Application No. PCT/CN2017/111938 dated Apr. 28, 2018, 16 pages.;;International Search Report in International Application No. PCT/CN2017/094762 dated May 3, 2018, 4 pages.;;Written Opinion in International Application No. PCT/CN2017/094762 dated May 3, 2018, 4 pages.;;Written Opinion in International Application No. PCT/CN2017/111938 dated Apr. 28, 20…	ACTIVE	X
239	US	B2	US 10478108 B2	125-434-171-965-431	43788	2019	US 201615017565 A	42405	US 201615017565 A;;US 201313927099 A;;US 73767107 A;;US 7067798 A	35915	Analyte monitoring device and methods of use	An analyte monitor includes a sensor, a sensor control unit, and a display unit. The sensor has, for example, a substrate, a recessed channel formed in the substrate, and conductive material disposed in the recessed channel to form a working electrode. The sensor control unit typically has a housing adapted for placement on skin and is adapted to receive a portion of an electrochemical sensor. Th…	ABBOTT DIABETES CARE INC	WOLPERT HOWARD;;HELLER ADAM	ABBOTT DIABETES CARE INC (2007-09-26)	https://lens.org/125-434-171-965-431	Granted Patent	yes	2754	0	7	028-267-804-518-913;;043-220-061-645-756;;099-234-877-461-713;;125-434-171-965-431;;057-668-841-687-395;;075-382-700-510-739;;013-125-583-725-450	US	221	087-811-442-993-202;;155-495-141-949-729;;122-465-007-173-582;;043-931-484-500-939;;109-356-915-693-221;;039-225-703-422-49X;;043-951-932-271-817;;199-220-800-110-315;;065-118-078-581-100;;034-591-163-326-381;;054-852-538-290-249;;083-636-658-954-842;;061-170-414-062-59X;;091-648-904-506-200;;010-352-823-887-83X;;071-544-416-432-757;;015-449-263-524-119;;079-933-317-171-07X;;183-887-029-287-890;;…	DK;;EP;;JP;;US;;AU;;WO	0	A61B5/14532;;A61B5/0002;;A61B5/14546;;A61B5/1473;;A61B5/14865;;A61B5/7275;;A61B5/7445;;A61B2560/0252;;A61B2560/063;;A61M5/14244;;A61M5/1723;;A61M2205/3569;;H01L23/3107;;H01L23/49548;;H01L2924/0002;;H01L2924/19041;;H01L2924/3011;;A61B5/1486;;A61B5/0002;;A61B5/1118;;A61B5/14532;;A61B5/14546;;A61B5/1473;;A61B5/14865;;A61B5/4839;;A61B5/7275;;A61B5/7445;;A61B2560/0252;;A61B2560/063;;A61M5/14244;;A61M5…	A61B5/00;;G01N27/30;;A61B5/11;;A61B5/145;;A61B5/1473;;A61B5/1477;;A61B5/1486;;A61B5/1495;;A61M5/142;;A61M5/172;;G01N27/416;;H01L23/31;;H01L23/495		805	348	136-791-935-548-81X;;062-360-289-025-864;;010-601-725-111-91X;;101-292-518-663-191;;056-703-879-057-297;;030-155-762-644-019;;004-149-141-436-651;;016-731-054-793-457;;080-559-561-995-335;;044-807-213-528-815;;027-538-525-436-179;;015-020-161-517-40X;;025-919-454-564-785;;014-700-576-603-812;;004-851-060-590-788;;075-958-432-122-199;;052-356-140-149-389;;035-090-282-884-790;;033-562-815-299-181;;…	10.1016/s0956-5663(02)00099-4;;12392956;;10.1021/ja00391a001;;2889225;;10.1098/rstb.1987.0021;;10.1109/51.294001;;10.1016/0022-0728(65)85063-x;;10.2337/diab.39.12.1519;;2245876;;10.2337/diabetes.39.12.1519;;10.1016/s0956-5663(03)00220-3;;14611755;;18615658;;10.1002/bit.260430310;;10.1016/s0956-5663(97)00025-0;;9366023;;9451795;;10.1016/s0956-5663(97)00083-3;;10.1016/0956-5663(93)80028-n;;8311939;…	“Poretics Polycarbonate Membrane”, Osmonics Filtration and Separation Group, 2002.;;Abel, P. U., et al., “Biosensors for In Vivo Glucose Measurement: Can We Cross the Experimental Stage”, Biosensors and Bioelectronics, vol. 17, 2002, pp. 1059-1070.;;Abruna, H. D., et al., “Rectifying Interfaces Using Two-Layer Films of Electrochemically Polymerized Vinylpyridine and Vinylbipyridine Complexes of R…	ACTIVE	X
244	US	B2	US 12102878 B2	131-497-476-401-528	45566	2024	US 202117395639 A	44414	US 202117395639 A;;US 202016869954 A;;US 202163168175 P;;US 201962858244 P;;US 201962846434 P	43595	Method and system for using artificial intelligence to determine a user's progress during interval training	A method is disclosed for using an artificial intelligence engine to perform a control action. The control action is based on measurements from a wearable device. The method includes generating, by the artificial intelligence engine, a machine learning model trained to receive the measurements as input, and outputting, based on the measurements, a control instruction that causes the control actio…	REHAB2FIT TECH INC	BISSONNETTE MICHAEL;;BERGA LUIS;;MASON STEVEN;;POWERS PHILIP;;STEIDL JAMES D		https://lens.org/131-497-476-401-528	Granted Patent	yes	1208	0	3	131-497-476-401-528;;155-374-845-225-517;;045-969-011-119-472	US	26	125-650-834-643-473;;065-051-242-073-682;;063-478-053-623-462;;041-591-495-181-418;;135-047-824-536-267;;189-547-348-071-349;;024-380-410-860-90X;;155-374-845-225-517;;138-198-624-598-065;;069-538-716-592-266;;101-554-053-818-516;;167-054-464-841-634;;109-137-986-136-860;;112-702-833-457-396;;013-072-115-759-91X;;131-497-476-401-528;;124-288-637-077-18X;;156-325-897-065-557;;012-700-977-958-46X;;…	US;;WO	0	A61B5/6802;;A63B24/0006;;A63B24/0062;;A63B24/0087;;A63B2024/0009;;A63B2024/0065;;A63B2024/0093;;G06N20/00;;A61B5/7267;;A61B5/02055;;A61B2505/09;;A63B23/03533;;A63B2022/0038;;A63B2220/805;;A63B2024/0096;;A63B71/0622;;A63B2022/0094;;A63B2225/15;;A63B2230/50;;A63B2225/20;;A63B2022/0617;;A63B22/0605;;A63B22/18;;A63B2071/0683;;A63B23/0355;;A63B2220/51;;A63B2230/42;;A63B2071/063;;A63B2230/06;;A63B2220/…	A63B24/00;;A61B5/00;;A63B71/06;;G06N20/00		59	32	083-655-573-187-297;;061-475-121-262-704;;038-441-613-001-19X;;004-446-359-385-798;;043-639-741-133-861;;020-743-093-005-479;;061-475-121-262-704;;083-655-573-187-297;;050-797-836-744-021;;053-770-699-494-28X;;010-292-986-456-119;;030-597-535-228-363;;032-388-876-484-615;;001-435-638-498-549;;108-760-913-423-066;;148-680-297-546-820;;079-520-829-998-649;;005-427-790-527-178;;046-813-353-293-951;;…	10.7861/futurehosp.6-2-94;;31363513;;pmc6616181;;32185396;;10.1093/database/baaa010;;pmc7078068;;10.1080/21681163.2020.1795929;;pmc7349532;;32604829;;10.3390/s20123601;;10.1155/2016/9276508;;pmc4806653;;27034953;;10.1016/j.apmr.2003.08.088;;15179662;;32185396;;10.1093/database/baaa010;;pmc7078068;;10.7861/futurehosp.6-2-94;;31363513;;pmc6616181;;31832118;;10.1007/s13167-019-00188-9;;pmc6882991;;1…	Claris Healthcare Inc., Claris Reflex Patient Rehabilitation System Brochure, retrieved on Oct. 2, 2019, 5 pages, https://clarisreflex.com/.;;Fysiomed, 16983—Vario adjustable pedal arms, retrieved on Aug. 4, 2020, 1 page, https://www.fysiomed.com/en/products/16983-vario-adjustable-pedal-arms.;;HCL Fitness, HCI Fitness PhysioTrainer Upper Body Ergonometer, announced 2009 [online], retrieved on Aug…	ACTIVE	X
245	EP	B1	EP 2142097 B1	023-467-838-948-713	43474	2019	EP 08733446 A	39570	AU 2008/000624 W;;AU 2007/902315 A;;US 91610807 P	39204	NON-INVASIVE MEASUREMENT OF BLOOD OXYGEN SATURATION		SENSITIVE PTY LTD	DIXON BARRY	SENSITIVE PTY LTD (2018-12-19)	https://lens.org/023-467-838-948-713	Granted Patent	yes	13	0	12	135-386-095-031-889;;093-123-938-142-821;;085-477-605-608-409;;084-572-681-899-876;;074-967-323-485-706;;050-809-355-179-901;;162-323-480-442-925;;029-812-961-640-346;;023-467-838-948-713;;098-180-159-270-309;;037-143-035-435-452;;107-430-074-531-403	EP;;JP;;US;;AU;;CA;;WO	13	135-386-095-031-889;;093-123-938-142-821;;050-809-355-179-901;;162-323-480-442-925;;023-467-838-948-713;;109-665-284-864-096;;037-143-035-435-452;;107-430-074-531-403;;085-477-605-608-409;;074-967-323-485-706;;029-812-961-640-346;;084-572-681-899-876;;098-180-159-270-309	EP;;JP;;ES;;US;;AU;;CA;;WO	0	A61B5/14551;;A61B5/4064;;A61B5/412;;A61B5/14551;;A61B5/4064;;A61B5/412	A61B5/00;;A61B5/1455		0	0				ACTIVE	X
246	US	B2	US 11534086 B2	103-000-669-921-747	44922	2022	US 202017086171 A	44134	US 202017086171 A	44134	Low-profile wearable medical device	Wearable medical devices are provided. An exemplary wearable medical device includes a printed circuit board assembly (PCBA) comprising a dielectric layer having a top surface and conductive features on the top surface of the dielectric layer. Further, the exemplary wearable medical device includes a top housing mounted directly to the top surface of the PCBA. Also, the wearable medical device in…	MEDTRONIC MINIMED INC	GARAI ELLIS;;BURGETT JAMES E;;FERRARO CLAIRE F	MEDTRONIC MINIMED INC (2020-10-29)	https://lens.org/103-000-669-921-747	Granted Patent	yes	117	9	4	110-137-059-528-498;;169-415-894-358-70X;;103-000-669-921-747;;140-306-332-877-262	EP;;US;;WO	4	110-137-059-528-498;;169-415-894-358-70X;;103-000-669-921-747;;140-306-332-877-262	EP;;US;;WO	0	A61B5/14532;;A61B2560/0412;;A61B2562/166;;A61B5/14532;;A61B5/0015;;A61B5/6833;;A61B2560/0412	A61B5/145;;A61B5/00		1	1	034-323-930-404-627	29596359;;10.3390/ma11040522;;pmc5951368	Yanfei Chen, et al., Advanvces in Materials for Recent Low-Profile Implantable Bioelectronics, Mar. 29, 2018, ncbi.hlm.nih.gov/pmc/articles/PMC5951368/.	ACTIVE	X
248	US	B2	US 12064238 B2	071-608-155-274-796	45524	2024	US 201917261243 A	43620	KR 20180089336 A;;KR 20180114775 A;;KR 2019006742 W	43312	Body attachable unit for continuous blood glucose measurement	A continuous blood glucose measurement body attachment unit is manufactured in an assembled state in an applicator so as to minimize additional operations, such that the body attachment unit can be attached to the body with only a simple operation of the applicator. The body attachment unit has a wireless communication chip so as to be capable of communicating with an external terminal, thereby e…	I SENS INC	CHAE KYUNG CHUL;;CHOI HYUN HO;;RYU GOANG YEL;;WANG JI HOON;;KANG YOUNG JEA	I-SENS INC (2021-01-07)	https://lens.org/071-608-155-274-796	Granted Patent	yes	15	0	19	089-501-329-607-006;;193-775-280-063-084;;117-823-236-100-711;;195-973-895-090-53X;;086-340-613-801-865;;159-781-557-058-893;;197-008-416-371-528;;142-396-072-659-625;;071-608-155-274-796;;148-395-614-777-356;;196-004-002-083-580;;061-032-402-351-583;;005-032-595-921-018;;044-480-013-621-44X;;055-207-054-629-810;;004-990-519-196-339;;086-015-391-418-414;;124-865-298-389-601;;092-740-638-165-762	EP;;KR;;JP;;US;;AU;;NZ	20	089-501-329-607-006;;193-775-280-063-084;;117-823-236-100-711;;195-973-895-090-53X;;086-340-613-801-865;;098-281-721-983-959;;159-781-557-058-893;;197-008-416-371-528;;142-396-072-659-625;;071-608-155-274-796;;148-395-614-777-356;;196-004-002-083-580;;061-032-402-351-583;;005-032-595-921-018;;044-480-013-621-44X;;055-207-054-629-810;;004-990-519-196-339;;086-015-391-418-414;;124-865-298-389-601;;…	EP;;KR;;JP;;US;;AU;;WO;;NZ	0	A61B5/14532;;A61B2560/0406;;A61B5/0024;;A61B5/150206;;A61B5/14532;;A61B5/0024;;A61B5/6846;;A61B5/68335;;A61B5/14503;;A61B5/14532;;A61B2562/166;;A61B2560/063;;A61B2562/227	A61B5/145;;A61B5/00		15	0			Extended European Search Report dated Sep. 2, 2021 for European Patent Application No. 19843118.1.;;Examination Report dated Oct. 26, 2021 for Australian Patent Application No. 2019313135.;;International Preliminary Report on Patentability (Chapter I) for PCT/KR2019/006742 issued on Feb. 2, 2021 and its English translation from WIPO (now published as WO2020/027422).;;International Search Report f…	ACTIVE	X
249	US	B2	US 10803721 B2	049-775-831-023-935	44117	2020	US 201916358727 A	43544	EP 18164053 A	43185	Method for supporting a user and user device	The present disclosure proposes a method for supporting a user. The method contains providing an acceleration measurement of the user and measuring at least one vital parameter of the user if the acceleration measurement is above a predefined acceleration threshold. A need of assistance for the user is signaled if the measured vital parameter of the user deviates from a standard vital parameter o…	SONY CORP	KHAC TRI VU;;CEULEMANS GERT;;MEYVIS FRANCIS;;EMBRECHTS HUGO;;BONDARENKO IGOR	SONY CORPORATION (2019-04-16)	https://lens.org/049-775-831-023-935	Granted Patent	yes	19	0	4	102-236-265-877-860;;070-876-361-345-035;;049-775-831-023-935;;171-055-108-613-319	EP;;US	4	102-236-265-877-860;;070-876-361-345-035;;049-775-831-023-935;;171-055-108-613-319	EP;;US	0	A61B5/746;;A61B5/0022;;A61B5/02055;;A61B5/02438;;A61B5/1112;;A61B5/1117;;A61B5/112;;A61B5/681;;A61B5/6898;;A61B5/7405;;A61B5/742;;A61B5/747;;G08B21/0446;;G08B21/0453;;G16H80/00;;H04M3/5116;;G08B21/043;;A61B5/0022;;A61B5/02055;;A61B5/02438;;A61B5/1112;;A61B5/1117;;A61B5/112;;A61B5/681;;A61B5/6898;;A61B5/7405;;A61B5/742;;A61B5/746;;A61B5/747;;G06F3/015;;G06F3/017;;G08B5/223;;G08B21/0446;;G08B21/045…	G08B21/04;;A61B5/00;;A61B5/0205;;A61B5/024;;A61B5/11;;G06F3/01;;G08B5/22;;G08B21/18;;G08B27/00;;H04M3/51		5	1	019-020-856-022-505	10.1145/2162081.2162089	Extended Search Report issued in European Application 19159879.6-1115 dated Jun. 27, 2019.;;Devpost, “Connected Intersections”, available at <https://intersections.devpost.com/submissions/26533-tug>, 7 pages.;;Wang et al., “WalkSafe: A pedestrian safety app for mobile phone users who walk and talk while crossing roads”, Hotmobile, Feb. 28-29, 2012, San Diego, CA, USA, 7 pages.;;Sant, “Why drivers…	ACTIVE	X
250	US	B2	US 12089914 B2	044-701-294-491-069	45552	2024	US 202017026929 A	44095	US 202017026929 A;;US 201916593354 A;;US 201815889992 A;;US 201514812696 A;;US 201462081185 P;;US 201462030314 P	41849	Enhanced physiological monitoring devices and computer-implemented systems and methods of remote physiological monitoring of subjects	Physiological sign monitoring devices, and systems and computer-implemented methods of remote physiological monitoring of subjects. A monitoring device includes a plurality of physiological sign monitoring portions. Each physiological sign monitoring portion of the device is configured for deployment on a different, respective surface of a subject including a surface on the back of an ear of the …	SEMPULSE CORP	STUMP KURT		https://lens.org/044-701-294-491-069	Granted Patent	yes	53	0	3	180-858-982-565-232;;044-701-294-491-069;;001-888-741-183-539	US	8	014-896-055-435-056;;044-701-294-491-069;;001-888-741-183-539;;151-416-340-726-436;;188-627-369-415-159;;180-858-982-565-232;;093-112-346-137-267;;007-494-118-453-492	US;;WO	0	G16H40/63;;A61B5/0022;;A61B5/6822;;A61B5/6814;;A61B5/14552;;A61B5/7275;;A61B5/02055;;A61B5/0533;;A61B5/28;;A61B5/1118;;A61B5/1102;;A61B5/6803;;A61B2562/0219;;A61B5/14517;;A61B5/14532;;A61B5/02108;;A61B5/02405;;A61B5/0022;;A61B5/02444;;A61B5/021;;A61B5/14551;;A61B5/742;;A61B5/11;;A61B2560/0257;;A61B5/7475;;G16H50/30;;A61B5/72;;G16H40/20;;A61B5/0205;;A61B5/33	A61B5/024;;A61B5/00;;A61B5/0205;;A61B5/021;;A61B5/11;;A61B5/1455;;A61B5/33;;G16H40/20;;G16H50/30		5	3	043-334-309-241-305;;027-256-959-573-589;;066-276-615-077-007	26054058;;10.1109/tbme.2015.2440291;;pmc4626385;;10.1109/tbme.2015.2441951;;pmc4515215;;26057530;;25571158;;10.1109/embc.2014.6944790;;pmc4605430	Kim, C.S., et al., “Ballistocardiogram as Proximal Timing Reference for Pulse Transit Time Measurement: Potential for Cuffless Blood Pressure Monitoring,” IEEE Transactions on Biomedical Engineering, vol. 62, No. 11, Nov. 2015, 10pgs http://www.ncbi.nlm.nih.gov/pubmed/26054058.;;Mukkamala, R., et al., “Toward Ubiquitous Blood Pressure Monitoring via Pulse Transit Time: Theory and Practice”, IEEE …	ACTIVE	X
252	US	B2	US 11642490 B2	000-324-637-169-710	45055	2023	US 201916258472 A	43490	US 201916258472 A;;US 201862621898 P;;US 201862692292 P	43125	Patch system for monitoring and enhancing sleep and circadian rhythm alignment	Disclosed are novel compositions, devices, patches, systems and methods that are useful for estimating, determining, modulating and/or improving the sleep/wake and/or circadian phase of a subject (e.g., a human subject) by the dispensing of measured quantities of agents to a subject or into an environment of the subject and the continuous monitoring and/or tracking of the subject's consciousness …	CIRCADIAN POSITIONING SYSTEMS INC	FERNANDES GUSTAVO E;;VAN REEN ELIZA	CIRCADIAN POSITIONING SYSTEMS INC (2019-07-18)	https://lens.org/000-324-637-169-710	Granted Patent	yes	19	0	10	134-703-531-352-305;;006-534-646-551-368;;000-324-637-169-710;;154-633-605-429-972;;048-664-135-259-460;;158-353-019-546-227;;155-561-928-772-149;;042-078-502-910-244;;123-029-418-579-304;;149-255-032-746-500	EP;;US;;FI;;WO	11	015-931-557-176-397;;134-703-531-352-305;;000-324-637-169-710;;006-534-646-551-368;;154-633-605-429-972;;158-353-019-546-227;;048-664-135-259-460;;155-561-928-772-149;;042-078-502-910-244;;123-029-418-579-304;;149-255-032-746-500	EP;;US;;FI;;WO	0	A61B5/6833;;A61B5/4809;;A61B5/163;;A61B5/4839;;A61B2562/0219;;A61B5/01;;A61B5/02055;;A61B5/14517;;A61B5/1455;;A61M21/02;;A61M2021/0016;;A61M2021/0044;;A61M2205/52;;A61M2230/04;;A61M2230/10;;A61M2230/14;;A61M2230/204;;A61M2230/50;;A61M2205/3561;;A61M2205/588;;A61M2205/8206;;A61B5/398;;A61B5/291;;A61M21/02;;A61B5/01;;A61B5/4815;;A61M2021/0005;;A61B2562/0219;;A61B5/4821;;A61K9/7023;;A61B5/4839;;A61B…	A61M21/02;;A61B5/00;;A61B5/01;;A61B5/0205;;A61B5/145;;A61B5/1455;;A61B5/16;;A61B5/291;;A61B5/398;;A61K9/70;;A61M21/00		1	0			International Search Report issued in International Application No. PCT/US2019/015292, dated Jun. 6, 2019.	ACTIVE	X
253	US	B2	US 10156686 B2	090-916-895-158-989	43452	2018	US 201013320549 A	40302	US 201013320549 A;;US 18521609 P;;IB 2010051959 W	39973	Disposable SpO2 grips	When monitoring blood oxygen levels in a patient during a magnetic resonance scan, detachable and reusable fiber optic cable heads (16, 18, 98, 131, 132) are coupled to an SpO2 monitor and to a hinged finger clip (40, 70, 90, 110, 190) on a patient. The finger clip (40, 70, 90, 110, 190) includes apertures (94, 196) and a retaining structure (44, 95, 198) to which a coupling portion of the fiber …	KAESTLE SIEGFRIED;;KONINKLIJKE PHILIPS NV	KAESTLE SIEGFRIED	KONINKLIJKE PHILIPS ELECTRONICS N.V (2009-05-29)	https://lens.org/090-916-895-158-989	Granted Patent	yes	23	12	9	090-916-895-158-989;;156-226-737-937-877;;146-096-740-359-953;;040-959-009-255-669;;171-972-791-679-133;;184-240-071-648-206;;174-483-312-555-507;;009-579-444-416-131;;146-818-898-979-855	CN;;EP;;JP;;US;;WO	9	090-916-895-158-989;;156-226-737-937-877;;146-096-740-359-953;;040-959-009-255-669;;171-972-791-679-133;;184-240-071-648-206;;009-579-444-416-131;;174-483-312-555-507;;146-818-898-979-855	CN;;EP;;JP;;US;;WO	0	A61B5/14552;;A61B5/6826;;A61B5/6838;;G02B6/0008;;A61B5/14552;;A61B5/6826;;A61B5/6838;;G02B6/0008	A61B5/1455;;A61B5/00;;F21V8/00;;G02B6/38		0	0				ACTIVE	X
254	US	B2	US 11109781 B2	080-355-256-370-940	44446	2021	US 201815890206 A	43137	US 201815890206 A;;US 201762457646 P	42776	Arrayed waveguide grating (AWG)-based Raman spectroscopy for glucose monitoring	Various embodiments of the invention provide systems and methods for low-cost, low-power Array Waveguide Grating (AWG)-based miniaturized Raman spectroscopy for use in non-invasive glucose monitoring systems, such as in wearable devices that require no replenishment of chemicals or enzymes. The AWG may be manufactured using VLSI processing technology, which significantly reduces manufacturing cos…	YANG SHENG;;YEH YEN CHUN;;SCHMIDT DOMINIK	YANG SHENG;;YEH YEN-CHUN;;SCHMIDT DOMINIK		https://lens.org/080-355-256-370-940	Granted Patent	yes	1	0	2	132-953-234-229-991;;080-355-256-370-940	US	2	132-953-234-229-991;;080-355-256-370-940	US	0	A61B5/1455;;A61B5/0075;;A61B5/14532;;A61B2562/0242;;A61B2562/12;;G01J3/0256;;G01J3/1895;;G01J3/44;;G01J2003/282;;G01N21/65;;G02B6/12002;;G02B6/12004;;G02B6/12014;;G02B6/136;;G02B6/4214;;G02B6/4298;;A61B5/1455;;A61B5/0075;;A61B5/14532;;A61B2562/0242;;A61B2562/12;;G01J3/0256;;G01J3/1895;;G01J3/44;;G01J2003/282;;G01N21/65;;G02B6/12002;;G02B6/12004;;G02B6/12014;;G02B6/136;;G02B6/4214;;G02B6/4298	A61B5/1455;;A61B5/00;;A61B5/145;;G01J3/02;;G01J3/18;;G01J3/28;;G01J3/44;;G01N21/65;;G02B6/12;;G02B6/136;;G02B6/42		24	20	130-199-274-693-022;;025-736-876-395-270;;035-773-498-051-563;;008-531-035-241-773;;146-628-738-222-485;;048-702-040-830-171;;089-741-874-028-504;;029-258-453-158-814;;102-729-907-848-056;;018-869-905-112-504;;045-967-329-864-764;;002-833-217-456-017;;003-641-209-483-197;;035-597-772-842-203;;029-635-689-992-38X;;012-238-535-801-994;;007-955-935-016-777;;010-351-811-418-927;;032-145-383-903-977;;…	15972203;;10.1016/j.ultrasmedbio.2005.04.004;;10.1016/j.molstruc.2004.10.115;;12421129;;10.1117/1.1501893;;16229636;;10.1117/1.1922147;;10.1016/j.aca.2012.03.043;;23062426;;10.1089/dia.2007.0288;;pmc2979340;;18715199;;18319874;;10.1364/ao.38.002916;;10.1364/ol.36.004629;;22139265;;10.1063/1.107703;;10.1366/0003702981944553;;10.1117/12.2213556;;10.1016/j.diabres.2010.12.025;;10.1016/s0925-4005(99)…	Sensors and Actuators B: Chemical. Papers 60(1), 19-26,1999. (2 pgs).;;Lee et al.,“Glucose measurements with sensors and ultrasound,” Ultrasound Med Biol. Papers 31(7), 971-977 , 2005. (2 pgs).;;Schrader et al.“Non-invasive glucose determination in the human eye,” J. Mol. Struct. Papers 735-736, 299-306, 2005. (2 pgs).;;Martin et al.,“Using two discrete frequencies within the middle infrared to q…	ACTIVE	X
255	US	B2	US 12042282 B2	020-540-701-809-471	45496	2024	US 202318197275 A	45061	US 202318197275 A;;US 202263342100 P	44695	Ear-wearable oxygen monitoring system	An apparatus for monitoring an oxygen saturation level of a wearer includes a first body portion, a second body portion, and a connection member. The first body portion contains a processor, a memory operably coupled to the processor, at least one light-emitting diode, and at least one optical sensor configured to detect, during operation, a reflected portion of light emitted from the at least on…	OXIWEAR INC	FERNANDO SHAVINI;;BECKSTEIN III GEORGE DONALD;;SALTHOUSE BEN;;WILCOX KEELINE	OXIWEAR INC (2024-02-16)	https://lens.org/020-540-701-809-471	Granted Patent	yes	172	2	12	047-894-190-405-472;;099-234-338-417-027;;162-764-702-190-596;;164-835-044-090-857;;005-265-771-219-12X;;030-123-195-868-588;;198-520-278-167-973;;024-894-615-665-567;;161-954-385-661-163;;020-540-701-809-471;;185-556-019-270-506;;033-586-665-684-143	CN;;KR;;EP;;JP;;US;;AU;;WO;;IL;;MX	12	047-894-190-405-472;;033-586-665-684-143;;005-265-771-219-12X;;164-835-044-090-857;;162-764-702-190-596;;198-520-278-167-973;;030-123-195-868-588;;099-234-338-417-027;;024-894-615-665-567;;020-540-701-809-471;;185-556-019-270-506;;161-954-385-661-163	CN;;KR;;EP;;JP;;US;;AU;;WO;;IL;;MX	0	A61B5/14552;;A61B5/6816;;A61B2560/0456;;A61B5/14552;;A61B2560/0456;;A61B5/746;;A61B5/6815;;A61B5/6816;;A61B5/14552;;A61B5/6815;;A61B5/746;;A61B2560/0456;;A61B5/14552;;A61B2560/0456;;A61B5/746;;A61B5/6815	A61B5/1455;;A61B5/00		19	0			Extended European Search Report for European Application No. EP20200827530 dated May 25, 2023, 7 pages.;;International Preliminary Report on Patentability for International Application No. PCT/US2020/038146 dated Dec. 30, 2021, 8 pages.;;International Search Report and Written Opinion for International Application No. PCT/US2020/038146, mailed Sep. 28, 2020, 9 pages.;;Singapore Application No. 11…	ACTIVE	X
256	US	B1	US 10368811 B1	177-237-483-760-391	43683	2019	US 201816124464 A	43350	US 201816124464 A;;US 201414519825 A	41933	Methods and devices for circadian rhythm monitoring	Methods for characterizing a circadian rhythm of a wearer of a wearable device are provided. In one example, physiometric measurements are obtained over a period of time by one or more sensors of a wearable device configured to be mounted to a body surface of a wearer. A circadian rhythm of the wearer, such as a sleeping, waking, eating or movement pattern, is characterized based on the physiomet…	VERILY LIFE SCIENCES LLC	BAJAJ VIKRAM SINGH;;JOOSTE SAREL KOBUS		https://lens.org/177-237-483-760-391	Granted Patent	yes	31	4	2	117-704-763-546-115;;177-237-483-760-391	US	2	117-704-763-546-115;;177-237-483-760-391	US	0	A61B5/4857;;A61B2560/0271;;A61B5/7275;;A61B5/02055;;A61B5/021;;A61B5/024;;A61B5/1118;;A61B5/14542;;A61B5/4857;;A61B5/6802;;A61B2560/0271	A61B5/00;;A61B5/0205;;A61B5/021;;A61B5/024;;A61B5/11;;A61B5/145		3	3	124-523-496-346-67X;;042-991-706-383-669;;090-170-132-210-293	10.1155/2009/439389;;10.3762/bjnano.1.17;;21977404;;pmc3045933;;pmc2930577;;10.1073/pnas.1003388107;;20696897	Manuel Arruebo, Monica Valladares, and Africa Gonzalez-Fernandez, Antibody-Conjugated Nanoparticles for Biomedical Applications, Journal of Nanomaterials, vol. 2009 (2009), Article ID 439389, 24 pages (available at http://dx.doi.org/10.115/2009/439389).;;Shao et al., “Magnetic nanoparticles for biomedical NMR-based diagnostics,” Beilstein Journal of Nanotechnology, 2010, 1, 142-154.;;Liu et al., …	ACTIVE	X
257	US	B2	US 12171550 B2	076-084-753-437-732	45650	2024	US 201917261005 A	43623	KR 20180089333 A;;KR 2019006843 W	43312	Body attachable unit for continuous blood glucose measurement	The present invention relates to a body attachment unit for continuous glucose monitoring. The present invention provides a body attachment unit for continuous glucose monitoring, wherein: the body attachment unit is manufactured in the state in which the body attachment unit is assembled in an applicator, and thus separate additional work is minimized and the body attachment unit can be attached…	I SENS INC	CHAE KYUNG CHUL;;CHOI HYUN HO;;RYU GOANG YEL;;WANG JI HOON;;KANG YOUNG JEA	I-SENS INC (2021-01-07)	https://lens.org/076-084-753-437-732	Granted Patent	yes	16	0	21	056-403-240-631-011;;056-965-955-358-420;;011-337-741-500-380;;150-168-637-627-23X;;173-580-261-113-992;;081-189-542-608-994;;082-873-448-314-997;;078-457-378-621-897;;125-927-582-002-395;;037-404-476-089-076;;094-378-505-475-445;;107-488-736-937-990;;089-441-591-788-509;;042-585-956-245-951;;134-302-767-666-143;;063-229-683-253-323;;012-233-044-131-102;;061-005-414-576-997;;076-084-753-437-732;;…	EP;;KR;;JP;;US;;AU;;WO;;NZ	21	056-403-240-631-011;;056-965-955-358-420;;011-337-741-500-380;;150-168-637-627-23X;;078-457-378-621-897;;081-189-542-608-994;;082-873-448-314-997;;173-580-261-113-992;;037-404-476-089-076;;125-927-582-002-395;;094-378-505-475-445;;107-488-736-937-990;;089-441-591-788-509;;042-585-956-245-951;;134-302-767-666-143;;063-229-683-253-323;;012-233-044-131-102;;061-005-414-576-997;;076-084-753-437-732;;…	EP;;KR;;JP;;US;;AU;;WO;;NZ	0	A61B5/14532;;A61B5/14865;;A61B2560/063;;A61B5/150206;;A61B5/14532;;A61B5/0024;;A61B5/6846;;A61B5/0015;;A61B5/14532;;A61B5/150267;;A61B5/6848;;A61B2560/0443	A61B5/145;;A61B5/00;;A61B5/15		14	0			International Search Report for PCT/KR2019/006843 mailed on Sep. 16, 2019 and its English translation from WIPO (now published as WO2020/027426).;;Written Opinion of the International Searching Authority for PCT/KR2019/006843 mailed on Sep. 16, 2019 and its English translation by Google Translate (now published as WO2020/027426).;;Office Action dated Nov. 11, 2021 for Australian Patent Applicatio…	ACTIVE	X
259	EP	B1	EP 2605813 B1	189-732-432-694-64X	43313	2018	EP 11818725 A	40772	US 37458310 P;;US 2011/0048083 W	40407	INTELLIGENT DRUG DELIVERY SYSTEM TO OPTIMIZING MEDICAL TREATMENT OR THERAPY.		UNIV FLORIDA	MELKER RICHARD J;;DENNIS DONN M;;MELKER JEREMY;;RICE MARK;;HURLEY ROBERT;;GOLD MARK S		https://lens.org/189-732-432-694-64X	Granted Patent	yes	9	0	9	122-442-968-380-319;;030-360-711-230-548;;064-287-028-965-457;;074-547-026-847-968;;198-854-227-969-968;;025-381-797-759-136;;033-761-308-116-75X;;176-195-867-832-017;;189-732-432-694-64X	EP;;US;;CA;;WO	9	122-442-968-380-319;;030-360-711-230-548;;064-287-028-965-457;;074-547-026-847-968;;198-854-227-969-968;;176-195-867-832-017;;033-761-308-116-75X;;189-732-432-694-64X;;025-381-797-759-136	EP;;US;;CA;;WO	0	A61M5/142;;A61M5/168;;A61M5/16854;;A61M5/172;;A61M5/31511;;A61B5/1455;;A61B5/0205;;A61B5/02416;;A61B5/0261;;A61B5/036;;A61B5/0816;;A61B5/4839;;G16H20/17;;G16H40/67;;A61B5/25;;A61M5/142;;A61M5/168;;A61M5/16854;;A61M5/172;;A61M5/31511;;A61B5/1455;;A61B5/0261;;A61B5/036;;A61B5/02416;;A61B5/0816;;A61B5/0205;;A61B5/4839;;G16H40/67;;A61M5/1723;;G16H20/17	G16H20/17;;A61B5/1455;;A61M5/172;;G16H40/67		0	0				ACTIVE	X
260	US	B2	US 11179113 B2	026-728-116-657-692	44523	2021	US 201816035057 A	43294	JP 2017138391 A;;JP 2018132125 A	42930	Presentation method, presentation device, and computer readable medium	A presentation method for presenting a time period to measure a blood glucose level, the presentation method includes: acquiring first information, the first information including a measurement result in which a glucose level of a user is measured with a time interval using a first measurement device and a measurement time at which the measurement result was acquired; determining, based on a comp…	ARKRAY INC	KOIDE KEIKO;;WADA ATSUSHI;;TAKEDA HIDEAKI	ARKRAY INC (2018-08-10)	https://lens.org/026-728-116-657-692	Granted Patent	yes	9	0	4	111-531-563-898-473;;162-796-274-007-826;;026-728-116-657-692;;125-033-092-803-39X	CN;;EP;;US	5	169-884-938-518-229;;111-531-563-898-473;;162-796-274-007-826;;026-728-116-657-692;;125-033-092-803-39X	CN;;EP;;JP;;US	0	A61B5/14532;;A61B5/6801;;G01N33/66;;G16H40/60;;G16H20/17;;G16H50/20;;A61B5/74;;A61B5/14503;;A61B5/14532;;A61B5/6826;;G16H20/17;;G16H40/60;;G16H50/20	A61B5/00;;A61B5/145;;G16H20/17;;G16H40/60;;G16H50/20		2	0			Communication pursuant to Article 94(3) EPC issued by the European Patent Office dated Oct. 12, 2020, which corresponds to European Patent Application No. 18 183 371.6-1126 and is related to U.S. Appl. No. 16/035,057.;;Extended European Search Report issued by the European Patent Office dated Dec. 10, 2018, which corresponds to European Patent Application No. 18 18 3371.	ACTIVE	X
[truncated: 926 more rows]
