# Supplementary material for: Health Monitoring via Wearables: Insights from Scientific Publications and Patents (2015–2024)
Source: Research Square preprint supplement (doi:10.21203/rs.3.rs-8742689/v1), 2026-02-04
Supplement: Supplementary file 2 [file d9a4c3f87a276148cd9261e3.xlsx]

## Sheet: Sheet1
Key	DOI	Url	Wearable	Type of Wearable Device	SubType of Wearable	Invasive	Applications or Use Cases	Measurement Methods	Subtype of Measurement Methods	Accuracy	Health Conditions	Targeted Health Conditions	Sweat yes/no	Saliva yes/no	Interstitial Fluid Yes/no	Fluid 01	Fluid 02	Fluid 03	Fluid 04	Fluid 05	Glucose Yes/NO	Lactate Yes/NO	Cortisol yes/no	Uric Acid yes/no	Urea yes/no	Cholesterol yes/no	pH yes/no	creatine yes/no	Biomarker 01	Biomarker 02	Biomarker 03	Biomarker 04	Biomarker 05	Nº of Fluid type analysed	Nº of Biomarkers detected	State of Development	Tested in Human?	Test model	Patents	CE mark	Innovative Features or Technologies	Company	Country of the company	Software	Software as Medical Device	Publication Year	Author	Title	Publication Title
NY6IHN8Q	10.1038/s41563-024-01918-9	https://www.nature.com/articles/s41563-024-01918-9	YES	skin-attached		NO	continuously monitor solid-state epidermal biomarkers (SEBs) present in the stratum corneum	electrochemical	Electrochemical	Solid Cholesterol Sensor: The cholesterol sensor demonstrates a high sensitivity of 201.34 nA nmol−1 cm−2. The detection limit for solid-state cholesterol is remarkably low at 0.26 nmol cm−2. Solid Lactate Sensor: The lactate sensor achieves a sensitivity of 93.8 nA nmol−1 cm−2. The lactate sensor boasts a detection limit of 0.51 nmol cm−2 for solid lactate. Experiments using dried human sweat sa…		NA	-	-	-	NONE SPECIFICALLY (skin contact)						yes				yes			cholesterol, lactate					0	2	Validation	Human	Human studies	NA	NA	The sensor utilizes a novel bilayer hydrogel system, a significant departure from conventional solid electrodes. This bilayer structure comprises an ionic conductive hydrogel (ICH) layer and an electronically conductive hydrogel (ECH) layer.	NO	NA	YES	NA	2024	Arwani, Ruth Theresia; Tan, Sherwin Chong Li; Sundarapandi, Archana; Goh, Wei Peng; Liu, Yin; Leong, Fong Yew; Yang, Weifeng; Zheng, Xin Ting; Yu, Yong; Jiang, Changyun; Ang, Yuan Ching; Kong, Lingxuan; Teo, Siew Lang; Chen, Peng; Su, Xinyi; Li, Hongying; Liu, Zhuangjian; Chen, Xiaodong; Yang, Le; Liu, Yuxin	Stretchable ionic–electronic bilayer hydrogel electronics enable in situ detection of solid-state epidermal biomarkers	Nature Materials
KR22IAJL	10.1016/j.bios.2019.02.041	https://linkinghub.elsevier.com/retrieve/pii/S0956566319301551	YES	skin-attached		NO	Real-Time Biomarker Monitoring	electrochemical	Electrochemical	Lactate Sensor: The lactate sensor achieved a sensitivity of 0.395 µA/mM. This value signifies that for every 1 millimolar (mM) increase in lactate concentration, the sensor output increases by 0.395 microamperes (µA). This sensitivity is comparable to previously reported lactate sensors, indicating that the device's performance is in line with existing technologies. Oxygen Sensor: The oxygen sen…		NA	-	-	-	NONE SPECIFICALLY (skin contact)						yes							Lactate, Oxygen					0	2	Proof-of-concept		Laboratory testing	NA	NA	A skin-inspired, porous, elastic and conformable. biosensor, engineered in deterministic geometries, capable of real-time. biofluid monitoring	NO	NA	NA	NA	2019	Ashley, Brandon K.; Brown, Matthew S.; Park, Youjoong; Kuan, Sally; Koh, Ahyeon	Skin-inspired, open mesh electrochemical sensors for lactate and oxygen monitoring	Biosensors and Bioelectronics
P33V9NFL	10.1002/adhm.201800232	https://onlinelibrary.wiley.com/doi/10.1002/adhm.201800232	YES	skin-attached		NO	detection of volatile organic compounds (VOCs) emitted from human skin	Chemiresistive	chemiresistive sensing	The sensor exhibits a significantly higher response to polar VOCs compared to nonpolar VOCs, The research evaluated the sensor's response to 11 representative VOCs, including both polar and nonpolar compounds, at concentrations ranging from 25 to 100 ppm. The sensor demonstrated distinct and measurable responses to each of these VOCs, indicating its capability to detect and differentiate between …		NA	-	-	-	Skin Emissions													2-hexanone, cyclohexanone, 1-hexanal, 1-hexanol, 1-heptanal, 3-heptanone, 1-octanal, 3-octanone, hexane, toluene, p-xylene					1	11	prototype		Laboratory testing	NA	NA	The sensor utilizes PANI as the sensing material due to its advantages such as low cost, ease of mass production, and biocompatibility. The researchers chemically modify the PANI thin film with oleic acid to create a hydrophobic layer. This modification is a key innovation as it addresses the challenge of humidity interference, a common issue with traditional conducting polymer-based sensors. The…	NO	NA	NO	NA	2018	Deng, Yunfeng; Sun, Jiaxing; Jin, Han; Khatib, Muhammad; Li, Xianhui; Wei, Zongsu; Wang, Feng; Horev, Yehu David; Wu, Weiwei; Haick, Hossam	Chemically Modified Polyaniline for the Detection of Volatile Biomarkers of Minimal Sensitivity to Humidity and Bending	Advanced Healthcare Materials
added later (from the PDF library)	10.1038/ncomms11650	https://www.nature.com/articles/ncomms11650	YES	skin-attached		NO	real-time health and fitness monitoring	electrochemical	Electrochemical + electrophysiological	Lactate Biosensor Sensitivity: 96 nA/mM, with a linear response across the physiological lactate range (0–28 mM). ECG Sensor Correlation: Pearson’s correlation coefficient of r = 0.975 when compared to a commercial heart rate monitor, indicating highly accurate heart rate measurements. Validation with ECG Electrodes: ECG signal morphology from the patch's printed electrodes matches that of commer…		NA	yes	-	-	sweat						yes							lactate					1	1	Prototype/Validation		in-vitro + laboratory testing	NA	NA	Flexible and Conformal Design: Utilizes a 50 μm flexible polyester substrate, enabling close skin contact and wearability. Screen-printing fabrication ensures cost-effective, scalable production and precise electrode patterning, aligning with epidermal electronics principles for unobtrusive use. Hybrid Sensor Integration: Combines chemical (sweat lactate) and electrophysiological (ECG) sensing in…	NO	NA	YES	NA	2016	Imani S, Bandodkar AJ, Mohan AM, Kumar R, Yu S, Wang J, Mercier PP.	A wearable chemical–electrophysiological hybrid biosensing system for real-time health and fitness monitoring	Nature Communications
M6F7ZS9Q	10.1016/j.bios.2015.07.039	https://www.ncbi.nlm.nih.gov/pubmed/26276541	YES	mouthguard		NO	monitoring salivary uric acid	electrochemical	Electrochemical	The biosensor displays attractive electrochemical performance with high selectivity, sensitivity and stability. The resulting calibration plot for UA detection in artificial saliva obtained by wireless transmission for different UA concentrations up to 600 μM with 100 μM increments, covering possible physiological levels of SUA, is presented. The resulting calibration plot, shown in the inset, is…	Hyperuricemia	Hyperuricemia	-	yes	-	saliva								yes					uric acid (UA)					1	1	prototype	Human	Human studies	NA	NA	The device utilizes a screen-printed electrode system that has been modified with the enzyme uricase. This enzyme-modified electrode system enables the detection of uric acid in saliva. The mouthguard incorporates anatomically miniaturized instrumentation electronics, including a potentiostat, microcontroller, and a Bluetooth Low Energy (BLE) transceive. This device allows real-time wireless tran…	NO	NA	YES	NA	2015	Kim, J.; Imani, S.; de Araujo, W. R.; Warchall, J.; Valdes-Ramirez, G.; Paixao, T. R.; Mercier, P. P.; Wang, J.	Wearable salivary uric acid mouthguard biosensor with integrated wireless electronics	Biosens Bioelectron
ZYDU6GIJ	10.1038/s41598-022-06434-x	https://www.ncbi.nlm.nih.gov/pubmed/35165316	YES	Electronic devices (combined with a Machine Learning platform)		NO	glucose monitoring	electrochemical	Electrochemical Impedance Spectroscopy (EIS)	The sources provide information regarding the performance of the machine learning algorithm utilized by the sweat sensor platform for glucose measurement. The algorithm achieved a goodness of fit (R²) value of 0.94. This indicates that the model explains 94% of the variance in the glucose readings, suggesting a high level of accuracy. The root mean square error (RMSE) value was reported as 0.1 mg…	Diabetes	Diabetes management	yes	-	-	human eccrine sweat					yes								glucose					1	1	Prototype/Validation	Human	Human studies	NA	NA	A highly novel and completely non-invasive sweat sensor platform technology that can measure and report glucose concentrations from passively expressed human eccrine sweat using electrochemical impedance spectroscopy and affinity capture probe functionalized sensor surfaces.	EnLiSense LLC	USA	YES	NA	2022	Sankhala, D.; Sardesai, A. U.; Pali, M.; Lin, K. C.; Jagannath, B.; Muthukumar, S.; Prasad, S.	A machine learning-based on-demand sweat glucose reporting platform	Sci Rep
3STEX5X4	10.1002/smll.202201861	https://www.ncbi.nlm.nih.gov/pubmed/35676237	YES	patch		NO	monitoring sweat	electrochemical	Electrochemical	The sensors show excellent selectivity toward the target analyte, low working voltages (<0.5 V), fast (5-15 s), linear response at a wide range of concentrations (10 µm to 100 mm), and sensitivities of 1 µA/decade.		NA	yes	-	-	artificial sweat													Na+, K+					1	2	Proof-of-concept		In-vitro tests	NA	NA	The device integrates several cutting-edge innovations, including the use of novel materials like rGO, advanced sensor designs like LGTs and ISMs, and sophisticated fabrication techniques like laser micromachining.	NO	NA	NA	NA	2022	Furlan de Oliveira, R.; Montes-Garcia, V.; Livio, P. A.; Gonzalez-Garcia, M. B.; Fanjul-Bolado, P.; Casalini, S.; Samori, P.	Selective Ion Sensing in Artificial Sweat Using Low-Cost Reduced Graphene Oxide Liquid-Gated Plastic Transistors	Small
2XN8KXFW	10.1002/adhm.202303511	https://onlinelibrary.wiley.com/doi/10.1002/adhm.202303511	YES	patch	microneedle	minimally	detection of multiple biomarkers related to Type 2 Diabetes (T2D)	Colorimetric	Colorimetric	The sources provide information on the accuracy of the wearable microneedle patch for detecting glucose, but they do not provide specific sensitivity values for any of the biomarkers the device is designed to measure. The results showed that the glucose concentration estimated by the patch was 18.63 ± 1.096 mm, which was close to the glucose meter reading of 21.9 ± 0.45 mm. This suggests that the…	Diabetes	diabetes management	-	-	yes	interstitial fluid					yes			yes			yes		Glucose, Uric Acid, pH, Insulin					1	4	Proof-of-concept		Animal models	NA	NA	Utilizing methacrylic acid modified gelatin and polyvinyl alcohol in the fabrication of microneedles has improved their mechanical properties for skin penetration and increased swelling capacity for interstitial fluid extraction, thanks to the double crosslinking mechanism. The fabricated microneedles are further integrated with test paper functionalized with enzyme and dye molecules to detect mu…	NO	NA	NA	NA	2024	Bao, Ziting; Lu, Sheng; Zhang, Duo; Wang, Guanyu; Cui, Xiaolin; Liu, Guozhen	Wearable Microneedle Patch for Colorimetric Detection of Multiple Signature Biomarkers in vivo Toward Diabetic Diagnosis	Advanced Healthcare Materials
DJ2GKTZZ	10.1016/j.bios.2021.113496	https://linkinghub.elsevier.com/retrieve/pii/S0956566321005339	YES	patch	microneedle array	minimally	detection and quantification of the ErbB2 breast cancer biomarker.	electrochemical	Electrochemical (electrochemical immunosensor).	The analytical performance of the device was tested in artificial interstitial fluid exhibiting a linear response over a wide concentration range from 10 to 250 ng/mL, with a detection limit of 4.8 ng/mL below the biomarker levels expected in breast cancer patients. As a proof of concept, the immunosensor demonstrated its ability to successfully extract ErbB2 from a phantom gel mimicking the epid…	Cancer	breast cancer	-	-	yes	Artificial interstitial fluid (aISF)													ErbB2					1	1	Proof-of-concept		In -vitro + laboratory testing	NA	NA	The ErbB2 immunosensor incorporates a combination of innovative technologies, including a high-density microneedle array for minimally invasive transdermal extraction, an integrated electrochemical transducer for rapid and direct biomarker quantification, and a skin-mimicking phantom gel for realistic performance evaluation	NO	NA	NO	NA	2021	Dervisevic, Muamer; Alba, Maria; Adams, Timothy E.; Prieto-Simon, Beatriz; Voelcker, Nicolas H.	Electrochemical immunosensor for breast cancer biomarker detection using high-density silicon microneedle array	Biosensors and Bioelectronics
GIFBFKSF	10.1038/s41598-018-24543-4	https://www.ncbi.nlm.nih.gov/pubmed/29695724	YES	not specified		NO	glycemic control	electrochemical	Electrochemical	The sensitivity calculated from the calibration curve is 0.2 ± 0.02 µA/mM with the R2 of 0.986		NA	yes	-	-	sweat					yes								glucose, alcohol					1	2	prototype	Human	Human	NA	NA	Zinc oxide thin films integrated into a nanoporous flexible electrode system.	NO	NA	NA	NA	2018	Bhide, A.; Muthukumar, S.; Saini, A.; Prasad, S.	Simultaneous lancet-free monitoring of alcohol and glucose from low-volumes of perspired human sweat	Sci Rep
IX2KJQ6R	10.1038/nature16521	https://www.ncbi.nlm.nih.gov/pubmed/26819044	YES	skin-attached	Array	NO	monitoring metabolites and electrolytes in sweat	electrochemical	Electrochemical	Na+ and K+ sensors had a relative standard deviation of ~1% in sensitivity while glucose and lactate sensors had a relative standard deviation of ~5% in sensitivity.		NA	yes	-	-	sweat					yes	yes							Glucose, Lactate, Na+, K+					1	4	prototype	Human	Human studies	NA	NA	FPCB (flexible printed circuit board) technology	NO	NA	YES	NA	2016	Gao, W.; Emaminejad, S.; Nyein, H. Y. Y.; Challa, S.; Chen, K.; Peck, A.; Fahad, H. M.; Ota, H.; Shiraki, H.; Kiriya, D.; Lien, D. H.; Brooks, G. A.; Davis, R. W.; Javey, A.	Fully integrated wearable sensor arrays for multiplexed in situ perspiration analysis	Nature
XXWLAY4V	10.3390/s19204590	https://www.ncbi.nlm.nih.gov/pubmed/31652574	YES	not specified		NO	monitoring hydration	electrochemical	Electrochemical	The precision and reliability of the data collected by the device are indicated by the R-squared values obtained from the calibration dose responses: - EIS: R-squared value of 0.9746; CA: R-squared value of 0.9403. These values, ranging from 0 to 1, indicate the goodness of fit of the calibration curve. A value closer to 1 suggests a stronger correlation between the measured signal and the actual…		NA	yes	-	-	sweat													Chloride ions					1	1	prototype	Human	Human studies	NA	NA	Non-faradaic electroanalysis using gold microelectrodes deposited on a flexible nanoporous substrate, for high nanoscale surface area to volume enhancement,	NO	NA	NA	NA	2019	Ganguly, A.; Prasad, S.	Passively Addressable Ultra-Low Volume Sweat Chloride Sensor	Sensors (Basel)
V627Z7VQ	10.1021/acsnano.8b07413	https://www.ncbi.nlm.nih.gov/pubmed/30543395	YES	skin-attached	chip	NO	analysis of pH level and Na+ and K+ concentrations.	electrochemical	Microfluidics with Ion-Sensitive Field-Effect Transistors	K+ (55 mV/dec); Na+ (62mV/dec); pH (36mV/dec).		NA	yes	-	-	sweat											yes		Na+, K+, pH					1	3	Prototype/Validation		Laboratory testing	NA	NA	This system heterogeneously integrates, on a single silicon chip, state-of-the-art ultrathin body (UTB) fully depleted silicon-on-insulator (FD-SOI) ISFET sensors with a biocompatible microfluidic interface, to deliver a "lab-on-skin" sensing platform.	NO	NA	NA	NA	2018	Garcia-Cordero, E.; Bellando, F.; Zhang, J.; Wildhaber, F.; Longo, J.; Guerin, H.; Ionescu, A. M.	Three-Dimensional Integrated Ultra-Low-Volume Passive Microfluidics with Ion-Sensitive Field-Effect Transistors for Multiparameter Wearable Sweat Analyzers	ACS Nano
DXCPHXUC	10.1038/srep14586	https://www.ncbi.nlm.nih.gov/pubmed/26420511	YES	not specified	flexible nanoporous	NO	monitoring cortisol in human sweat	Electrical	Electrical double layer (EDL) modulation and impedance measurements	1 pg/mL or 2.75 pmol cortisol in synthetic sweat; 1 ng/mL in human sweat.		NA	yes	-	-	sweat							yes						cortisol					1	1	prototype	Human	Human studies	NA	NA	Electrical double layer (EDL) modulated biosensor	NO	NA	NA	NA	2015	Munje, R. D.; Muthukumar, S.; Panneer Selvam, A.; Prasad, S.	Flexible nanoporous tunable electrical double layer biosensors for sweat diagnostics	Sci Rep
6JD63KMV	10.3390/s21217311	https://www.ncbi.nlm.nih.gov/pubmed/34770617	YES	skin-attached	electronic tongue	NO	monitoring sweat	electrochemical	Electrochemical (Voltammetry)	After analysis of the data, principal component analysis (PCA) explained a total of 87.8% of the variance, where five PCs were extracted, all with absolute Eigen values larger than one. The PCs explained a total 47.4%, 21.7%, 8.3%, 6.2%, and 4.2% of the variance, respectively. A detailed breakdown of one of each repeat measurement of different fluids per PC is also listed in Table 2 (see pag.11/1…		NA	yes	-	-	sweat					yes	yes			yes				Glucose, lactate, ascorbic acid, urea, sodium bicarbonate (NaCarb), sodium chloride, (+ albumin only for characterisation*)					1	6	Prototype		In-vitro tests	NA	NA	A wearable electronic tongue is presented by incorporating metal electrodes on a flexible circuit board and used to non-invasively monitor sweat on the body. The data obtained from the measurements were treated by multivariate data processing.	Covercast AB (deducted by affiliations)	Sweden	NA	NA	2021	Falk, M.; Nilsson, E. J.; Cirovic, S.; Tudosoiu, B.; Shleev, S.	Wearable Electronic Tongue for Non-Invasive Assessment of Human Sweat	Sensors (Basel)
5WFLQGRX	10.1016/j.crmeth.2023.100579	https://www.ncbi.nlm.nih.gov/pubmed/37751686	YES	not specified		NO	real-time monitoring of multiple metabolites	electrochemical	Electrochemical	The 3D-structured biosensor shows wide linear ranges of 400-1,400 μM and 0.1-8 mM and high sensitivities of 460.5 and 283.09 μA/(mM·cm2) for lactate and glucose detection, respectively.		NA	-	-	yes	interstitial fluid					yes	yes							lactate, glucose					1	2	Validation		Animal models	NA	NA	A key technological innovation incorporated into the wearable biosensor is the use of a 3D-structured nickel foam in the sensor design	NO	NA	NA	NA	2023	Yang, M.; Wang, H.; Cheng, J.	Continuous monitoring of multiple biomarkers with an ultrasensitive 3D-structured wearable biosensor	Cell Rep Methods
QHFMFSQK	10.1021/acssensors.7b00961	https://www.ncbi.nlm.nih.gov/pubmed/29741360	YES	patch		NO	monitoring sweat rate and composition	electrochemical	Electrochemical + electrical impedance	The SD varies between 6 and 11 %. As evidenced from the experimental results, the sensor can accurately quantify the flow rate that is in the physiologically relevant range of the sweat rate.		NA	yes	-	-	sweat													H+, Na+, K+, Cl-					1	4	prototype	Human	Human studies	NA	NA	Flexible microfluidic sweat sensing patch that enhances real-time electrochemical sensing and sweat rate analysis via sweat sampling.	NO	NA	YES	NA	2018	Nyein, H. Y. Y.; Tai, L. C.; Ngo, Q. P.; Chao, M.; Zhang, G. B.; Gao, W.; Bariya, M.; Bullock, J.; Kim, H.; Fahad, H. M.; Javey, A.	A Wearable Microfluidic Sensing Patch for Dynamic Sweat Secretion Analysis	ACS Sens
M2GMIVPN	10.1002/advs.202103030	https://www.ncbi.nlm.nih.gov/pubmed/34719884	YES	not specified	Dermal Tattoo	NO	detection of health-related biomarkers	Optical	Optical	It can be seen that the tattoo clearly formed on the rabbit skin, changing the color under different concentrations of biomarkers injected subcutaneously. First, the glucose sensing area shows green because of hypoglycemia caused by fasting, while pH, uric acid, and temperature sensing areas show green, orange, and blue, respectively, corresponding to the normalphysiological conditions. After sub…		NA	-	-	yes	interstitial fluid					yes			yes			yes		pH, glucose, uric acid (UA)					1	3	Proof-of-concept		In-vitro, ex-vivo, in-vivo (animal models)	NA	NA	Dermal tattoo biosensor to simultaneously detect multiple health-related biomarkers in skin interstitial fluid. The biosensor exhibits color changes in response to the change of biomarker concentration (i.e., pH, glucose, uric acid, and temperature), which can be directly read by naked eyes or captured by a camera for semi-quantitative measurement.	NO	NA	NA	NA	2021	He, R.; Liu, H.; Fang, T.; Niu, Y.; Zhang, H.; Han, F.; Gao, B.; Li, F.; Xu, F.	A Colorimetric Dermal Tattoo Biosensor Fabricated by Microneedle Patch for Multiplexed Detection of Health-Related Biomarkers	Adv Sci (Weinh)
RNFKQPTY	10.1039/c7lc00192d	https://www.ncbi.nlm.nih.gov/pubmed/28470263	YES	eyeglasses		NO	monitoring of electrolytes and metabolites	electrochemical	Electrochemical	Lactate sensor characterization: detection (LOD) of 0.39 mM (CLk=3) was calculated based on the IUPAC recommendation.The lactate sensor inter-electrode reproducibility was evaluated. A deviation of 5-15% was found for high and low lactate concentrations, respectively. Such reproducibility is satisfactory considering the low cost electrode fabrication route. Potassium sensor characterization: the …		NA	yes	-	-	sweat					yes	yes							lactate, glucose, K+					1	3	Prototype	Human	Human studies	NA	NA	Fully-integrated wireless “Lab-on-a-Glass” multiplexed biosensor platform	NO	NA	NA	NA	2017	Sempionatto, J. R.; Nakagawa, T.; Pavinatto, A.; Mensah, S. T.; Imani, S.; Mercier, P.; Wang, J.	Eyeglasses based wireless electrolyte and metabolite sensor platform	Lab Chip
BPSFDJSB	10.3390/bios13030372	https://www.ncbi.nlm.nih.gov/pubmed/36979585	YES	patch	epidermal microfluidic sampler	NO	sweat analysis for health monitoring	Colorimetric	Colorimetric	high detection sensitivity" for glucose in the range of 0.1 mM to 1 mM.		NA	yes	-	-	sweat					yes								glucose					1	1	Proof-of-concept/validation	Human	In-vitro + in-vivo (human)	NA	NA	The sources emphasize the use of low-cost laser-cutting technology as a key innovation in the fabrication process. A notable innovation lies in the integration of capillary bursting valves (CBVs).	NO	NA	NA	NA	2023	He, Y.; Wei, L.; Xu, W.; Wu, H.; Liu, A.	Laser-Cutted Epidermal Microfluidic Patch with Capillary Bursting Valves for Chronological Capture, Storage, and Colorimetric Sensing of Sweat	Biosensors (Basel)
A34E4MWM	10.1016/j.bios.2023.115097	https://www.ncbi.nlm.nih.gov/pubmed/36858023	YES	skin-worn	microfluidic sampler	NO	real-time cortisol monitoring in sweat	electrochemical	Electrochemical	Device operation was demonstrated invitro with a broad linear dynamic range (1 pM - 1 μM) covering the physiological range and a sub-picomolar (0.2 pM) limit of detection in sweat. Real-time, on-body measurements were collected from human subjects using an induced stress protocol, demonstrating in-situ signal regeneration and the ability to detect dynamic cortisol fluctuations continuously for up…		NA	yes	-	-	sweat							yes						cortisol					1	1	Prototype/Validation	Human	In-vitro + human studies	NA	NA	Cortisol is detected using an electrochemical sensor functionalized with a pseudoknot-assisted aptamer and a flexible microfluidic sweat sampling system. The skin-worn microfluidic sampler provides rapid sweat collection while separating old and new sweat. The conformation-switching aptamer provides high specificity towards cortisol while being regenerable, allowing it to monitor temporal changes…	NO	NA	NA	NA	2023	Singh, N. K.; Chung, S.; Chang, A. Y.; Wang, J.; Hall, D. A.	A non-invasive wearable stress patch for real-time cortisol monitoring using a pseudoknot-assisted aptamer	Biosens Bioelectron
F6FGVLCA	10.1021/acssensors.1c01009	https://www.ncbi.nlm.nih.gov/pubmed/34228919	YES	patch		NO	real-time monitoring of lactate in sweat	electrochemical	Electrochemical	Correlation with a Standardized Method - comparison of the biosensor's performance against ion chromatography - Pearson correlation coefficient of 0.97, strongly supports the accuracy of the biosensor's measurement. The variations in sensitivity were reported to be less than 5%, indicating good repeatability, reproducibility and reversibility.		NA	yes	-	-	sweat						yes					yes		lactate, pH					1	2	Validation	Human	Human studies	NA	NA	A novel analytical strategy based on the restriction of the lactate flux that reaches the enzyme lactate oxidase, which is immobilized in the biosensor core. This is accomplished by means of an outer plasticized polymeric layer containing the quaternary salt tetradodecylammonium tetrakis(4-chlorophenyl) borate (traditionally known as ETH500).	NO	NA	NA	NA	2021	Xuan, X.; Perez-Rafols, C.; Chen, C.; Cuartero, M.; Crespo, G. A.	Lactate Biosensing for Reliable On-Body Sweat Analysis	ACS Sens
K4UVSAA5	10.1126/sciadv.aax0649	https://www.ncbi.nlm.nih.gov/pubmed/31723600	YES	patch		NO	simultaneous detection of six health-related biomarkers in sweat	electrochemical	Electrochemical	The relative standard deviations (RSDs) are 3.6% for glucose, 4.2% for lactate, 2.8% for AA, 3.9% for UA, 8.2% for Na+, and 7.5% for K+, demonstrating the good reproducibility of these sensors.		NA	yes	-	-	sweat					yes	yes		yes					glucose, lactate, ascorbic acid, uric acid, Na+, K+					1	6	prototype	Human	Human studies	NA	NA	The device incorporates a flexible sweat analysis patch fabricated using a silk fabric-derived carbon textile. This textile exhibits a unique combination of properties: an intrinsically N-doped graphitic structure and a hierarchical woven, porous structure.	NO	NA	NA	NA	2019	He, W.; Wang, C.; Wang, H.; Jian, M.; Lu, W.; Liang, X.; Zhang, X.; Yang, F.; Zhang, Y.	Integrated textile sensor patch for real-time and multiplex sweat analysis	Sci Adv
FEE26R9V	10.1016/j.bios.2023.115504	https://linkinghub.elsevier.com/retrieve/pii/S0956566323004463	YES	patch	2 forms: Skin-attached sensor/Textile-embedded	NO	continuously monitor and analyze sweat in real-time	electrochemical	Electrochemical	Accurate detection within 0.2–4.0 μL/min, with a strong linear correlation (R² = 0.999) between injected flow rates and measured values. Consistent performance across devices from the same batch due to FPCB-based fabrication. Linear relationship (R² = 0.992) between conductance difference (ΔG) and NaCl concentrations ranging from 10–200 mmol/L. Measurements validated using dedicated electrodes, w…		NA	yes	-	-	sweat													Total Ionic Charge Concentration, Sweat Rate and Total Sweat Loss (Sweat Volume)*					1	NA*	Validation	Human	in-vitro tests + laboratory testing + human studies	NA	NA	Dual-Mode Signal Decoupling: A hollowed-out serpentine microchannel with interdigitated electrodes (IDSs) allows simultaneous measurement of sweat rate and ionic charge concentration, enhanced by a decoupling algorithm for precise data analysis without complex calibration. Janus Textile Material: Features a tri-layer structure with directional sweat permeability—hydrophobic, diffusion, and transf…	NO	NA	NA	NA	2023	Liu, Mengyuan; Wang, Shuqi; Xiong, Zuoping; Zheng, Zhuo; Ma, Nan; Li, Lianhui; Gao, Qiang; Ge, Changlei; Wang, Yongfeng; Zhang, Ting	Perspiration permeable, textile embeddable microfluidic sweat sensor	Biosensors and Bioelectronics
CFR6UIMY	10.1016/j.talanta.2021.123187	https://www.ncbi.nlm.nih.gov/pubmed/35030501	YES	patch	hydrogel	NO	noninvasive glucose monitoring using natural sweat	electrochemical	Electrochemical	We characterized the sweat glucose sensor response to different deposition charges. The sensitivity was estimated from the slope of the calibration curve, and the deposition charge of 0.2 mA reveals good sensitivity compared to others with a similar conclusion about the electrochemical characteristics.		NA	yes	-	-	sweat					yes								glucose					1	1	Prototype/Validation	Human	Human studies	NA	NA	A noninvasive sweat glucose sensor with convenient hydrogel patches for rapid sampling of natural perspiration without external activities that stimulate sweating. The wearable hydrogel patch rapidly takes up natural sweat from the hand and serves as a medium for electrochemical sensing. A Prussian blue-doped poly(3,4-ethylenedioxythiophene nanocomposite (PB-PEDOT NC) electrode provides cost-effe…	NO	NA	NA	NA	2022	Lin, P. H.; Sheu, S. C.; Chen, C. W.; Huang, S. C.; Li, B. R.	Wearable hydrogel patch with noninvasive, electrochemical glucose sensor for natural sweat detection	Talanta
TMEAC3VV	10.1038/s41551-022-00887-1	https://www.nature.com/articles/s41551-022-00887-1	YES	microneedle	Array	minimally	continuous, real-time, and simultaneous measurement of multiple biomarkers in interstitial fluid (ISF)	electrochemical	Electrochemical	Accuracy: Correlation with Reference Methods: The device's measurements of ISF lactate, glucose, and alcohol levels were consistently correlated with those obtained using standard reference methods (blood lactate meter, blood glucose meter, and breathalyzer). Lactate: Pearson correlation coefficient (Pearson's r) of 0.94 Glucose: Mean absolute relative difference (MARD) of 8.83% Alcohol: Pearson'…		NA	-	-	yes	interstitial fluid					yes	yes							Glucose, Lactate, Alcohol					1	3	validation	Human	in-vitro tests + human studies	NA	NA	Pain-Free Microneedle Design: a cost-effective micromachining process ensures precise, reproducible microneedles for painless skin penetration and continuous interstitial fluid (ISF) access. Multiplexed Sensing: multiple regionally separated electrodes enable simultaneous real-time detection of biomarkers (e.g., glucose, lactate, alcohol) with minimal crosstalk. Advanced Biosensing Chemistry: mul…	NO	NA	YES	NA	2022	Tehrani, Farshad; Teymourian, Hazhir; Wuerstle, Brian; Kavner, Jonathan; Patel, Ravi; Furmidge, Allison; Aghavali, Reza; Hosseini-Toudeshki, Hamed; Brown, Christopher; Zhang, Fangyu; Mahato, Kuldeep; Li, Zhengxing; Barfidokht, Abbas; Yin, Lu; Warren, Paul; Huang, Nickey; Patel, Zina; Mercier, Patrick P.; Wang, Joseph	An integrated wearable microneedle array for the continuous monitoring of multiple biomarkers in interstitial fluid	Nature Biomedical Engineering
F5T4UQEW	10.1016/j.talanta.2023.124507	https://linkinghub.elsevier.com/retrieve/pii/S0039914023002588	YES	textile		NO	non-invasive, continuous sweat collection and analysis for health monitoring.	Colorimetric	Colorimetric	Here is a summary of the LOD for each analyte: Chloride: 1.06 mM Urea: 3.05 mM The researchers note that the normal ranges for the analytes in healthy individuals are: Chloride: 10–30 mM pH: 4.2–7.5 Urea: 5–40 mM The source does not provide a specific value for the LOD of pH.		NA	yes	-	-	sweat									yes		yes		chloride, pH, urea					1	3	Proof-of-concept	Human	In-vitro tests + human studies	NA	NA	The sources highlight the use of a Janus fabric as a key technological innovation in the wearable colorimetric sweat sensing system. This fabric features opposite wettability on its two sides—hydrophobic and hydrophilic—enabling unidirectional sweat transport.	NO	NA	NA	NA	2023	Xi, Pengyu; He, Xuecheng; Fan, Chuan; Zhu, Qinglin; Li, Zehua; Yang, Yuemeng; Du, Xin; Xu, Tailin	Smart Janus fabrics for one-way sweat sampling and skin-friendly colorimetric detection	Talanta
AHH5I82G	10.1039/c6an02571d	https://www.ncbi.nlm.nih.gov/pubmed/28300229	YES	patch	skin-attached	NO	sugar monitoring	Impedance spectroscopy	Electrical impedance spectroscopy	Experimental results showed that impedance and capacitance variations of the device, in the measurement frequency range, responded consistently to sugar concentrations from 0 to 5 mM, in aqueous phosphate buffer solutions. Impedance measured at a frequency of 1 kHz shows a decrease with increasing sugar concentration. Additionally, the relative capacitance changes observed are markedly different …	Diabetes	diabetes management	yes	-	-	PBS solution added with monosaccharides (to simulate human sweat).)					yes	yes					yes		Glucose, Fructose, Chloride, pH, Lactate					1	5	Proof-of-concept		Laboratory testing	NA	NA	Carbon interdigitated electrodes printed on paper, modified with a thin layer of responsive hydrogel	NO	NA	NA	NA	2017	Daikuzono, C. M.; Delaney, C.; Tesfay, H.; Florea, L.; Oliveira, O. N.; Morrin, A.; Diamond, D.	Impedance spectroscopy for monosaccharides detection using responsive hydrogel modified paper-based electrodes	Analyst
R6N6CZZS	10.1021/acssensors.2c01827	https://www.ncbi.nlm.nih.gov/pubmed/36455259	YES	textile		NO	quantification of biomarkers in sweat for health monitoring	electrochemical	Electrochemical	The limit of detection (LOD) was determined to be 5.8 μM, consistent with most published works focusing on Ca2+ measurements, which were in the single digit μM range.This is sufficient for wearable Ca2+ detection because the physiological range in sweat is mainly around 0.2 mM to 2 mM.		NA	yes	-	-	sweat													Ca2+					1	1	Prototype/Validation	Human	Human studies	NA	NA	Integration of microfluidic channels directly onto fabric, creating a flexible and wearable platform for sweat analysis. The device utilizes electrodes that are screen-printed directly onto the fabric substrate.	NO	NA	YES	NA	2022	Zhang, T.; Ratajczak, A. M.; Chen, H.; Terrell, J. A.; Chen, C.	A Step Forward for Smart Clothes horizontal line Fabric-Based Microfluidic Sensors for Wearable Health Monitoring	ACS Sens
UC8J35PX	10.1038/s41598-019-53677-2	https://www.ncbi.nlm.nih.gov/pubmed/31754149	YES	wrist-worn	clothing	NO	sweat monitoring	electrochemical	Electrochemical	The conductivity of a PEDOT:PSS fiber changes linearly according to the concentration of sodium chloride in liquid.		NA	yes	-	-	sweat													NaCl					1	1	prototype		Laboratory testing	NA	NA	The device features a novel material: a flexible, hair-like conducting polymer fiber composed of PEDOT:PSS.	NO	NA	NA	NA	2019	Lim, T.; Kim, Y.; Jeong, S. M.; Kim, C. H.; Kim, S. M.; Park, S. Y.; Yoon, M. H.; Ju, S.	Human sweat monitoring using polymer-based fiber	Sci Rep
TULBVKWJ	10.1126/sciadv.aar2904	https://www.ncbi.nlm.nih.gov/pubmed/30035216	YES	patch	skin-attached	NO	monitoring stress	electrochemical	Electrochemical	RSD of 5% (for two measurements).		NA	yes	-	-	sweat							yes						cortisol					1	1	prototype	Human	Human	NA	NA	Artificial receptor as a biomimetic polymeric membrane for stable and selective molecular recognition using OECTs to produce a wearable sweat diagnostics platform	NO	NA	NA	NA	2018	Parlak, O.; Keene, S. T.; Marais, A.; Curto, V. F.; Salleo, A.	Molecularly selective nanoporous membrane-based wearable organic electrochemical device for noninvasive cortisol sensing	Sci Adv
3DJCTG3D	10.1039/d2tb02142k	https://www.ncbi.nlm.nih.gov/pubmed/37254923	YES	skin-worn	microneedle	Minimally	monitoring of cholesterol levels in interstitial fluid	electrochemical	Electrochemical	Under optimal conditions, the enzymatic microneedle sensor exhibited high sensitivity (0.201 μA μM−1) towards cholesterol in buffer solution, with good linearity over the 1–20 μM range and a correlation coefficient of 0.9910.		NA	-	-	yes	interstitial fluid										yes			cholesterol					1	1	Prototype/Validation		In-vitro tests	NA	NA	The microneedle sensor was developed by incorporating platinum (Pt) and silver (Ag) wires within pyramidal microneedles containing a microcavity opening; cholesterol oxidase (ChOx) was coupled on the Pt transducer surface using bovine serum albumin and Nafion.	NO	NA	NA	NA	2023	Li, Z.; Kadian, S.; Mishra, R. K.; Huang, T.; Zhou, C.; Liu, S.; Wang, Z.; Narayan, R.; Zhu, Z.	Electrochemical detection of cholesterol in human biofluid using microneedle sensor	J Mater Chem B
RHV9F42R	10.1016/j.bios.2023.115301	https://linkinghub.elsevier.com/retrieve/pii/S0956566323002439	YES	textile		NO	real-time, non-invasive monitoring of biomarkers in sweat.	electrochemical	Electrochemical	The sources report a remarkable LOD of 280 fg mL−1 for IL-6 using the electrochemical fabric. The sensing fibers were tested using artificial sweat spiked with known concentrations of IL-6. The fabric exhibited good recovery with relative standard deviation (RSD) values of less than 10%. While the primary focus is on IL-6 detection, the sources also mention the fabric's capability to detect corti…		NA	yes	-	-	sweat							yes						IL-6, cortisol					1	2	Prototype/Validation	Human	In-vitro experiments, in-situ (human)	NA	NA	A novel electrochemical fabric based on aptamer-functionalized carbon nanotube/graphene fibers for real-time and in situ monitoring of IL-6, a paramount cytokine biomarker for inflammation and cancer. This fabric system possesses flexibility, anti-fatigue ability and breathability for wearable applications and can apply to different body parts in various forms.	NO	NA	YES	NA	2023	Chu, Hongwei; Hu, Xiaokang; Lee, Cheng-Yu; Zhang, Anning; Ye, Yang; Wang, Yuxin; Chen, Yangyang; Yan, Xiao; Wang, Xinzhong; Wei, Jun; He, Sisi; Li, Yingchun	A wearable electrochemical fabric for cytokine monitoring	Biosensors and Bioelectronics
L5KQYQR9	10.1016/j.talanta.2024.125967	https://linkinghub.elsevier.com/retrieve/pii/S0039914024003461	YES	skin-attached		NO	real-time collection and analysis of sweat	electrochemical	Electrochemical	Na+ and K+ sensors: Repeatability: RSD < 1%, ensuring consistent measurements. Consistency: RSD < 2% across multiple sensors, highlighting reliable fabrication. Stability: RSD < 5% over half a month, indicating durable performance. Glucose sensor: Sensitivity: 981.3 nA/mM, reflecting high responsiveness to glucose concentration changes. Linearity: Accurate quantification in the 0–400 μM range. St…		NA	yes	-	-	sweat					yes								Na+, K+, Glucose					1	3	Validation	Human	in-vitro tests + laboratory testing + human studies.	NA	NA	Advanced Microfluidic System: sophisticated design with optimized channels and chambers ensures efficient, continuous sweat collection while minimizing evaporation and contamination. Screen-Printed Sensor Array: enables precise, reproducible, and cost-effective fabrication of compact electrochemical sensors for Na+, K+, and glucose detection. PEDOT:PSS for Stability: conductive polymer enhances i…	NO	NA	NO	NA	2024	Yin, Yingda; Tan, Zhiguang; Zhu, Wangwang; Pu, Zhihua; Yu, Haixia; Wang, Ridong; Li, Dachao	A wearable microfluidic system for efficient sweat collection and real-time detection	Talanta
9NW94WCS	10.1016/j.bios.2024.116502	https://linkinghub.elsevier.com/retrieve/pii/S0956566324005074	YES	skin-attached		NO	non-invasively monitor biomarkers related to oxidative stress in human sweat	electrochemical	Electrochemical	For H2O2, the sensor demonstrated a detection limit of 4.80 μM. The sensor showed a linear response to H2O2 concentrations ranging from 0.01 to 1 mM. For phosphorylated proteins, the sensor achieved a detection limit of 0.917 μg/mL. The sensor's linear range for phosphorylated proteins spanned from 0.01 to 1 mg/mL. This range encompasses the typical concentration of proteins found in sweat, ensur…		NA	yes	-	-	sweat											yes		Hydrogen peroxide (H2O2), Phosphorylated proteins* (types or numbers NA)					1	2*	Prototype/Validation	Human	laboratory testing + in-vitro tests + animal models + human studies (preliminary)	NA	NA	Morphology and Defect Modulation: a novel coaxial layering of CNTs/MoS2-X with sulfur-rich vacancies boosts electroactive sites, improving sensitivity for H2O2 detection. Phosphoprotein Detection: integration of TiO2 nanoparticles enables selective binding of phosphorylated proteins, broadening biomarker analysis. Microfluidic System: features a concave design for efficient sweat collection and c…	NO	NA	YES	NA	2024	Ying, Zhiye; Qiao, Lijuan; Liu, Bingxin; Gao, Li; Zhang, Peng	Development of a microfluidic wearable electrochemical sensor for the non-invasive monitoring of oxidative stress biomarkers in human sweat	Biosensors and Bioelectronics
JZH2EGNN	10.1016/j.bios.2024.116712	https://linkinghub.elsevier.com/retrieve/pii/S0956566324007188	YES	skin-attached		NO	monitoring amino acid levels and pH in sweat	electrochemical	Electrochemical	The device's performance metrics include: Regression Analysis (R-value): the BPNN model achieved R-values >0.99 for tyrosine, tryptophan, and pH, indicating strong prediction accuracy in controlled settings. Mean Absolute Error (MAE): prediction errors averaged 2.79 for tryptophan and 5.41 for tyrosine. Root Mean Square Error (RMSE): RMSE values were 3.59 for tryptophan and 6.90 for tyrosine, ref…		NA	yes	-	-	sweat											yes		Tyrosine, Tryptophan, pH					1	3	Validation	Human	laboratory testing + in-vitro tests + human studies (preliminary)	NA	NA	Laser-Induced Graphene (LIG) Electrodes: Flexible, biocompatible, and highly sensitive electrodes with high electron mobility and large surface area, directly patterned on a polyimide substrate. Dual-Working Electrode System: Multi-walled carbon nanotube (MWCNT) and carbon black (CB) electrodes enable selective detection of overlapping sweat analytes using machine learning. Microfluidic Integrati…	NO	NA	YES	NA	2024	Zhou, Zhongzeng; He, Xuecheng; Xiao, Jingyu; Pan, Jiuxiang; Li, Mengmeng; Xu, Tailin; Zhang, Xueji	Machine learning-powered wearable interface for distinguishable and predictable sweat sensing	Biosensors and Bioelectronics
TBGFRBWU	10.1016/j.bios.2019.04.058	https://www.ncbi.nlm.nih.gov/pubmed/31096082	YES	eyeglasses		NO	monitoring of tear biomarkers	electrochemical	Electrochemical	The correlation between tear alcohol readings and BAC measurements from a breathalyzer showed a Pearson's r value of 0.852 in in-vitro studies and an average R<sup>2</sup> of 0.912 in on-body experiments. A general correlation with a Pearson's r value of ~0.7 was observed between blood glucose levels from a glucometer and the device's readings in on-body experiments		NA	-	-	-	tear					yes								Alcohol, glucose, vitamin B2, vitamin C, vitamin B6.					1	5	Proof-of-concept	Human	Human studies	NA	NA	The device integrates a microfluidic electrochemical detector into an eyeglasses nose-bridge pad, for non-invasive monitoring of key tear biomarkers. The alcohol-oxidase (AOx) biosensing fluidic system allowed real-time tear collection and direct alcohol measurements in stimulated tears, leading to the first wearable platform for tear alcohol monitoring.	NO	NA	YES	NA	2019	Sempionatto, J. R.; Brazaca, L. C.; Garcia-Carmona, L.; Bolat, G.; Campbell, A. S.; Martin, A.; Tang, G.; Shah, R.; Mishra, R. K.; Kim, J.; Zucolotto, V.; Escarpa, A.; Wang, J.	Eyeglasses-based tear biosensing system: Non-invasive detection of alcohol, vitamins and glucose	Biosens Bioelectron
98P5WNTU	10.1016/j.snb.2021.131204	https://linkinghub.elsevier.com/retrieve/pii/S092540052101772X	YES	skin-attached		NO	monitoring of glucose levels in sweat.	electrochemical	Photoelectrochemistry + enzymatic reactions	The wearable PEC sensor patch exhibits high sensitivity for glucose detection, with a reported limit of detection (LOD) of 22.2 pM. Correlation with Commercial Assay Kit: sweat glucose measurements obtained using the PEC sensor patch showed strong agreement with results from a commercial glucose assay kit. This indicates the device's reliability in quantifying glucose levels. Relationship with Bl…	Diabetes	diabetic diagnosis and management	yes	-	-	sweat					yes								glucose					1	1	Prototype	Human	Human studies	NA	NA	Unbiased Detection Mode: Operates at zero potential, eliminating the need for batteries, simplifying the design, and reducing costs. High Sensitivity: Achieves a detection limit of 22.2 pM using SiO2 nanoparticles for noise reduction and a BiVO4-MWNT composite for superior photocatalytic properties. Flexible and Durable Design: Features flexible three-electrode arrays and a PDMS sweat collector, …	NO	NA	NA	NA	2022	Liu, Yanwen; Zhong, Lin; Zhang, Shubo; Wang, Juan; Liu, Zhihong	An ultrasensitive and wearable photoelectrochemical sensor for unbiased and accurate monitoring of sweat glucose	Sensors and Actuators B: Chemical
ZYYXPBLE	10.1016/j.bios.2020.112038	https://www.ncbi.nlm.nih.gov/pubmed/31989942	YES	wrist-worn	smartwatch-like	NO	metabolic health and physiological monitoring	electrochemical	Electrochemical.	The sensors demonstrated sensitivities of: 26.31 μA mM-1·cm-2 for glucose; 1.49 μA mM-1·cm-2 for lactate; 54 mV·pH-1 for pH.		NA	yes	-	-	sweat					yes	yes					yes		glucose, lactate, pH					1	3	Prototype/Validation		In-vitro tests	NA	NA	A wearable system with a flexible sensor array for non-invasive and continuous monitoring of human biochemistry. The system includes signal conditioning, processing, and transmission parts for continuous measurement of glucose, lactate, pH, and temperature. The system can operate three discrete electrochemical cells.Utilization of redundant working electrodes improves the measurement accuracy of …	NO	NA	NA	NA	2020	Yokus, M. A.; Songkakul, T.; Pozdin, V. A.; Bozkurt, A.; Daniele, M. A.	Wearable multiplexed biosensor system toward continuous monitoring of metabolites	Biosens Bioelectron
JQS2327V	10.1039/c8nr04315a	https://www.ncbi.nlm.nih.gov/pubmed/30431030	YES	not specified	nanosensor	NO	measurement of cytokine biomarkers	Other	Aptamer-based affinity	26 pM in a repeatable manner.		NA	yes	-	-	sweat													TNF-α					1	1	prototype		Laboratory testing	NA	NA	Aptamer functionalized, graphene-based field effect transistor (GFET) nanosensor on a flexible, SiO2 coated substrate of the polymer polyethylene naphthalate (PEN).	NO	NA	YES	NA	2018	Hao, Z.; Wang, Z.; Li, Y.; Zhu, Y.; Wang, X.; De Moraes, C. G.; Pan, Y.; Zhao, X.; Lin, Q.	Measurement of cytokine biomarkers using an aptamer-based affinity graphene nanosensor on a flexible substrate toward wearable applications	Nanoscale
2KEDTNX7	10.1016/j.talanta.2020.120922	https://linkinghub.elsevier.com/retrieve/pii/S0039914020302137	YES	patch		NO	non-invasive monitoring of specific biomarkers in sweat	electrochemical	Electrochemical	Pearson correlation for glucose variation rates between sweat and blood: 0.75 Pearson correlation for lactate variation rates between sweat and blood: >0.8 High agreement between flow-through biosensor readout and independent sweat measurements, with a Pearson correlation coefficient of >0.98. The device successfully tracked blood glucose dynamics during a glucose tolerance test, showing close co…	Diabetes	diabetes and hypoxia	yes	-	-	sweat					yes	yes							glucose, lactate					1	2	Validation	Human	Human studies	NA	NA	The wearable sweat-monitoring device incorporates a flow-through biosensor system for continuous sweat analysis, addressing limitations of earlier "tattoo" biosensors that could not accurately monitor successive sweat samples. The flow-through design allows freshly secreted sweat to flow over the sensor surface, enabling real-time monitoring of glucose and lactate levels without mixing previous s…	NO	NA	NA	NA	2020	Karpova, Elena V.; Karyakina, Elena E.; Karyakin, Arkady A.	Wearable non-invasive monitors of diabetes and hypoxia through continuous analysis of sweat	Talanta
K2F8QUM5	10.1038/s41598-020-64406-5	https://www.ncbi.nlm.nih.gov/pubmed/32382047	YES	wrist and ventral forearm	band	NO	sweat monitoring	electrochemical	Combined: Electrochemical + Ion-Selective Electrodes (ISEs) +Conductometry	On increasing the exercise load from 100 W to 200 W the sweat chloride concentration increased from 12.0 ± 5.9 to 31.4 ± 16 mM (mean ± SD). On decreasing the load from 200 W to 100 W, the sweat chloride concentration decreased from 27.7 ± 10.5 to 14.8 ± 8.1 mM. The half-time associated with the change in sweat chloride was about 6 minutes. While the changes in sweat chloride were statistically si…		NA	yes	-	-	sweat													chloride					1	1	Validation	Human	Human studies	NA	NA	The sensor likely incorporates advanced signal processing techniques to ensure accurate and reliable data interpretation.The ability to provide real-time feedback on sweat chloride levels requires efficient algorithms capable of rapidly processing and analyzing the sensor's output.	NO	NA	NA	NA	2020	Choi, D. H.; Kitchen, G. B.; Stewart, K. J.; Searson, P. C.	The Dynamic Response of Sweat Chloride to Changes in Exercise Load Measured by a Wearable Sweat Sensor	Sci Rep
JFQZ2JTD	10.1016/j.bios.2021.113685	https://linkinghub.elsevier.com/retrieve/pii/S0956566321007223	YES	skin-attached		NO	continuous, real-time, and non-invasive monitoring of various physiological and electrochemical parameters	electrochemical	Electrochemical + electrical	The fabricated electrochemical glucose biosensor exhibited excellent linearity (R2 = 0.9986) and sensitivity (29.10 μA mM-1 cm-2), covering the normal range of human sweat. The potentiometric pH sensor displayed a good response with an excellent sensitivity of -77.81 mV/pH and high linearity (R2 = 0.991), indicating that it can distinguish variations in the typical pH range for human sweat. Furth…	Diabetes	monitoring and management of diabetes and cardiovascular health	yes	-	-	sweat					yes						yes		glucose, pH					1	2	Prototype/Validation	Human	laboratory testing + human studies (preliminary)	NA	NA	Flexible Substrate: a polyimide base ensures conformal skin attachment, enhancing comfort and reliability for wearable use. Integrated Multi-Sensor Platform: combines glucose, pH, temperature, and ECG sensors in a miniaturized design, enabling comprehensive health monitoring. High-Sensitivity Glucose Sensor: features rGO and PtNP-enhanced electrodes for precise glucose detection at low concentrat…	NO	NA	NA	NA	2022	Yoon, Sanghyuk; Yoon, Hyosang; Zahed, Md Abu; Park, Chani; Kim, Dongkyun; Park, Jae Yeong	Multifunctional hybrid skin patch for wearable smart healthcare applications	Biosensors and Bioelectronics
D29U6F8K	10.1126/sciadv.aaz0007	https://www.ncbi.nlm.nih.gov/pubmed/32219164	YES	wrist-worn	smartwatch-like	NO	to monitor the sweat metabolite profiles of individuals in sedentary and high-intensity	electrochemical	Electrochemical.	The measured sensor responses across all conditions exhibit negligible fluctuations (<8%), indicating the suitability of the FESS-based smartwatch to render high-fidelity biomarker data recording in the presence of unconstrained body motion.		NA	yes	-	-	sweat					yes	yes							glucose, lactate					1	2	Prototype/Validation	Human	Human studies	NA	NA	Freestanding Electrochemical Sensing System (FESS) into a smartwatch platform, creating a self-contained unit capable of sweat sampling, analysis, and data display/transmission.	NO	NA	YES	NA	2020	Zhao, Y.; Wang, B.; Hojaiji, H.; Wang, Z.; Lin, S.; Yeung, C.; Lin, H.; Nguyen, P.; Chiu, K.; Salahi, K.; Cheng, X.; Tan, J.; Cerrillos, B. A.; Emaminejad, S.	A wearable freestanding electrochemical sensing system	Sci Adv
GXRIEIX5	10.1002/adma.202209300	https://www.ncbi.nlm.nih.gov/pubmed/36576895	YES	electronic skin (E-skin) platform		NO	monitoring multiple physiological and metabolic biomarkers.	electrochemical	Electrochemical	NA		NA	yes	-	yes	sweat	interstitial fluid				yes	yes							Glucose, Lactate, alcohol					1	2	Prototype/Validation	Human	In-vitro + human studies	NA	NA	A biocompatible and biodegradable E-skin patch based on flexible gelatin methacryloyl aerogel (FGA) for non-invasive and continuous monitoring of multiple biomarkers of interest is engineered and demonstrated. Taking advantage of cryogenic temperature treatment and slow polymerization, FGA is fabricated with a highly interconnected porous structure that displays good flexibility, passive-cooling …	NO	NA	NA	NA	2023	Zhu, Y.; Haghniaz, R.; Hartel, M. C.; Guan, S.; Bahari, J.; Li, Z.; Baidya, A.; Cao, K.; Gao, X.; Li, J.; Wu, Z.; Cheng, X.; Li, B.; Emaminejad, S.; Weiss, P. S.; Khademhosseini, A.	A Breathable, Passive-Cooling, Non-Inflammatory, and Biodegradable Aerogel Electronic Skin for Wearable Physical-Electrophysiological-Chemical Analysis	Adv Mater
7XVRRYBE	10.1002/adma.202102740	https://onlinelibrary.wiley.com/doi/10.1002/adma.202102740	YES	skin-attached		NO	efficient collection and transport of sweat to a sensor for analysis.	Other	Cactus-spine-inspired, wedge-shaped wettability-patterned channel to collect sweat and transport it to a sweat reservoir where it can be analyzed by a sensor.	The lactate and glucose sensors used in the wearable patch have a highly linear concentration dependence, meaning the sensor output is directly proportional to the concentration of the analyte. The source reports an R2 value of 0.99 for both sensors, indicating a strong correlation between the sensor response and the actual concentration of lactate and glucose. The source doesn't provide specific…		NA	yes	-	-	sweat					yes	yes							glucose, lactate					1	2	prototype	Human	laboratory testing + in-vitro tests + human studies (preliminary)	NA	NA	Wedge-Shaped Wettability-Patterned Channels: these microfluidic channels mimic cactus spines, using a unidirectional Laplace pressure gradient to rapidly transport sweat to sensors, even against gravity. Superhydrophobic/Superhydrophilic Surface Patterning: hierarchical surface engineering amplifies sweat transport efficiency through precise spatial control of surface energy. Enclosed Channel Des…	NO	NA	NA	NA	2021	Son, Jonghyun; Bae, Geun Yeol; Lee, Siyoung; Lee, Giwon; Kim, Seong Won; Kim, Daegun; Chung, Sein; Cho, Kilwon	Cactus‐Spine‐Inspired Sweat‐Collecting Patch for Fast and Continuous Monitoring of Sweat	Advanced Materials
7NI55BGL	10.1021/acsami.8b17419	https://www.ncbi.nlm.nih.gov/pubmed/30516364	YES	not specified		NO	sweat monitoring	electrochemical	Electrochemical	detection limit of 6 μM for H2O2 sensing.		NA	yes	-	-	sweat													H2O2					1	1	prototype	Human	Human studies	NA	NA	Graphene films as working electrodes and metal pins as counter electrodes.	NO	NA	NA	NA	2019	Li, G.; Mo, X.; Law, W. C.; Chan, K. C.	Wearable Fluid Capture Devices for Electrochemical Sensing of Sweat	ACS Appl Mater Interfaces
3G3K5PD7	10.1021/acssensors.9b00891	https://www.ncbi.nlm.nih.gov/pubmed/31271034	YES	wrist-worn	smartwatch-like	NO	monitoring of sweat glucose levels	electrochemical	Electrochemical techniques	Reproducibility of the sensors shows an average sensitivity of 3.29 nA μM−1, with a relative standard deviation (RSD) of 8.8%. Sensors maintained a sensitivity of 3.18 nA μM−1 after 2 h long-term measurements, which is within a variation of 3.3% compared to the average sensitivities of the as-fabricated sensors.		NA	yes	-	-	sweat					yes								glucose					1	1	prototype	Human	Human studies	NA	NA	Self-powered and fully integrated smartwatch that consists of flexible photovoltaic cells and rechargeable batteries in the forms of a "watch strap", electrochemical glucose sensors, customized circuits, and display units integrated into a "dial" platform is successfully fabricated for real-time and continuous monitoring of sweat glucose levels	NO	NA	NA	NA	2019	Zhao, J.; Lin, Y.; Wu, J.; Nyein, H. Y. Y.; Bariya, M.; Tai, L. C.; Chao, M.; Ji, W.; Zhang, G.; Fan, Z.; Javey, A.	A Fully Integrated and Self-Powered Smartwatch for Continuous Sweat Glucose Monitoring	ACS Sens
AGN4RZSZ	10.1002/adhm.202302173	https://onlinelibrary.wiley.com/doi/10.1002/adhm.202302173	YES	skin-attached		NO	colorimetric analysis of sweat biomarkers, enabling non-invasive monitoring of various health parameters	Colorimetric	Colorimetric	These tests demonstrate the patch's accuracy in recovering known concentrations of metabolites. The reported recovery rates range from 99.4% to 103.7% for pH, glucose, lactate, and uric acid. This indicates a high level of precision in measuring these biomarkers.		NA	yes	-	-	sweat					yes	yes		yes			yes		pH, Glucose, Lactate, Uric Acid					1	4	Validation	Human	laboratory testing + human studies	NA	NA	Ceramic-Ink Microfluidic Channels: provides higher resolution (450 μm vs. 850 μm), enhanced thermal stability, leakage prevention, and resistance to organic solvents, improving durability and precision. Nanoparticle-Enhanced Detection Zones: incorporates SiO2, ZnO, and Al2O3 nanoparticles to improve color intensity, sensitivity, and dynamic range for colorimetric analysis. Moisture-Sensitive Chan…	NO	NA	NA	NA	2024	Zheng, Xin Ting; Goh, Wei Peng; Yu, Yong; Sutarlie, Laura; Chen, Der Ying; Tan, Sherwin Chong Li; Jiang, Changyun; Zhao, Meng; Ba, Te; Li, Hongying; Su, Xiaodi; Yang, Le	Skin‐Attachable Ink‐Dispenser‐Printed Paper Fluidic Sensor Patch for Colorimetric Sweat Analysis	Advanced Healthcare Materials
I5C5IKGR	10.1021/acssensors.0c00791	https://www.ncbi.nlm.nih.gov/pubmed/32429661	YES	sweat band		NO	monitoring nicotine level	electrochemical	Electrochemical detection.	The sensors’ sensitivities to nicotine (10 sensors) show these values: The mean, median, and standard deviation are 4.4, 4.6, and 1.4 nA/μM, respectively.		NA	yes	-	-	sweat													nicotine					1	1	Prototype/Validation	Human	Human studies	NA	NA	The development of a wearable sweatband itself represents a significant advancement in health monitoring technology.	NO	NA	NA	NA	2020	Tai, L. C.; Ahn, C. H.; Nyein, H. Y. Y.; Ji, W.; Bariya, M.; Lin, Y.; Li, L.; Javey, A.	Nicotine Monitoring with a Wearable Sweat Band	ACS Sens
NCRESJCU	10.1021/acs.nanolett.9b02478	https://www.ncbi.nlm.nih.gov/pubmed/31381353	YES	wrist-worn	band	NO	monitoring levodopa dynamics in the body	Other	Iontophoresis	The inset displays the calibration curve with a sensitivity of 15 nA/μM, which is on par with the best levodopa sensors reported. This is notable considering the simplicity of electrode functionalization and the electrode’s excellent stability for long-term usage	Neuro	Parkinson’s disease	yes	-	-	sweat													Levodopa					1	1	prototype	Human	Human studies	NA	NA	Nanodendritic Platform	NO	NA	NA	NA	2019	Tai, L. C.; Liaw, T. S.; Lin, Y.; Nyein, H. Y. Y.; Bariya, M.; Ji, W.; Hettick, M.; Zhao, C.; Zhao, J.; Hou, L.; Yuan, Z.; Fan, Z.; Javey, A.	Wearable Sweat Band for Noninvasive Levodopa Monitoring	Nano Lett
82MHTNK6	10.1007/s00216-024-05135-w	https://link.springer.com/10.1007/s00216-024-05135-w	YES	skin-attached		NO	sweat glucose detection	electrochemical	Electrochemical	The wearable biosensor exhibits a sensitivity of 14.64 µA mM−1 cm−2 and a limit of detection (LOD) of 4.83 µM. The LOD is a measure of the smallest amount of glucose the sensor can reliably detect. The researchers tested the biosensor's performance in both a controlled buffer solution (PBS) and artificial sweat, achieving good linearity and accuracy in both scenarios1. The linear range of the sen…	Diabetes	diabetes management	yes	-	-	sweat					yes								glucose					1	1	Prototype/Validation	Human	laboratory testing + human studies	NA	NA	Cost-Effective and Scalable: CBNPs are less expensive and simpler to synthesize compared to graphene or nanotubes, enabling practical large-scale production. Superior Conductivity and Stability: high electrical conductivity and excellent solvent dispersibility ensure uniform, stable electrode coatings for efficient electron transfer. Enhanced Surface Area and Sensitivity: their large surface area…	NO	NA	NA	NA	2024	Tang, Chaoli; Zhou, Kai; Wang, Rujing; Li, Mengya; Liu, Wenlong; Li, Chengpan; Chen, Xiangyu; Lu, Qinwen; Chang, Yongjia	Wearable biosensors for human sweat glucose detection based on carbon black nanoparticles	Analytical and Bioanalytical Chemistry
273QL2UT	10.1016/j.talanta.2020.121153	https://linkinghub.elsevier.com/retrieve/pii/S0039914020304446	YES	skin-attached		NO		electrochemical	Electrochemical	The LOD values achieved using the wearable sensor are: Cd2+: 1.01 μM Pb2+: 0.43 μM Uric acid: 1.8 μM (using anodically pre-treated electrodes) 17β-estradiol: 0.58 μM (using anodically pre-treated electrodes)		NA	yes	-	-	sweat								yes					Cadmium (Cd2+), Lead (Pb2+), Uric acid, 17β-estradiol					1	4	proof-of-concept/exploratory		in-vitro tests (with artificial sweat)	NA	NA	This wearable sensor leverages microbial nanocellulose (MNC) as a breakthrough substrate, offering innovative features: Biocompatibility and Comfort: MNC adheres to skin without adhesives and minimizes irritation, ensuring a comfortable, skin-friendly design. Breathability and Sweat Management: its porous structure enables gas and liquid permeability, preventing sweat accumulation. Sustainable an…	NO	NA	NO	NA	2020	Silva, Robson R.; Raymundo-Pereira, Paulo A.; Campos, Anderson M.; Wilson, Deivy; Otoni, Caio G.; Barud, Hernane S.; Costa, Carlos A.R.; Domeneguetti, Rafael R.; Balogh, Debora T.; Ribeiro, Sidney J.L.; Oliveira Jr., Osvaldo N.	Microbial nanocellulose adherent to human skin used in electrochemical sensors to detect metal ions and biomarkers in sweat	Talanta
IK247MYV	10.1016/j.talanta.2020.121145	https://www.ncbi.nlm.nih.gov/pubmed/32887090	YES	wrist-worn	smartwatch-like	NO	monitoring of electrolyte concentrations	electrochemical	Electrochemical (solid-contact ion-selective electrodes (ISEs))	The resulting electrodes showed good sensitivity (52.4 ± 6.3 mV/decade (PEDOT) and 56.4 ± 2.2 mV/decade (POT) for Na+ ISEs, and 45.7 ± 7.4 mV/decade (PEDOT) and 54.3 ± 1.5 mV/ decade (POT) for K+) and excellent selectivity towards potential interferents present in human sweat (H+, Na+, K+, Mg2+, Ca2+).		NA	yes	-	-	sweat													Na+, K+.					1	2	Prototype/Validation	Human	Human studies	NA	NA	SwEatch device incorporates several cutting-edge innovations, including solid-contact ISEs, conductive polymer transducers, a 3D-printed platform with a mirrored fluidic unit, integrated electronics with wireless data transmission, and automated fabrication processes.	NO	NA	YES	NA	2020	Pirovano, P.; Dorrian, M.; Shinde, A.; Donohoe, A.; Brady, A. J.; Moyna, N. M.; Wallace, G.; Diamond, D.; McCaul, M.	A wearable sensor for the detection of sodium and potassium in human sweat during exercise	Talanta
3YKGTKMD	10.1016/j.bios.2020.112844	https://linkinghub.elsevier.com/retrieve/pii/S0956566320308307	YES	skin-attached		NO	real-time, on-site monitoring of potassium ion (K+) concentration in human sweat	electrochemical	Electrochemical	High sensitivity: the fabricated sensor demonstrated a high sensitivity of 63 mV/dec, further amplified to 173 mV/dec using the integrated NFC amplification system. Excellent selectivity: the sensor exhibited strong selectivity for K+ ions, with minimal interference from other ions commonly found in sweat (Ca2+, Na+, Zn2+). Good repeatability and reproducibility: multiple tests demonstrated consi…		NA	yes	-	-	sweat													K+					1	1	Validation	Human	laboratory testing + human studies	NA	NA	Hybrid MXene-Ti₃C₂Tₓ/MWCNT Electrode: combines high-conductivity MXene with MWCNTs for a stable, noise-resistant electrode with enhanced sensitivity. Flexible Substrate with Integrated Microfluidics: PET substrate and PDMS microfluidics enable efficient sweat collection and contamination prevention, ensuring real-time K⁺ monitoring. Battery-Free NFC Operation: uses smartphone-powered NFC for wire…	NO	NA	YES	NA	2021	Zhang, Shipeng; Zahed, Md Abu; Sharifuzzaman, Md.; Yoon, Sanghyuk; Hui, Xue; Chandra Barman, Sharat; Sharma, Sudeep; Yoon, Hyo Sang; Park, Chani; Park, Jae Yeong	A wearable battery-free wireless and skin-interfaced microfluidics integrated electrochemical sensing patch for on-site biomarkers monitoring in human perspiration	Biosensors and Bioelectronics
3LKATQNE	10.1016/j.bios.2021.113606	https://www.ncbi.nlm.nih.gov/pubmed/34507206	YES	skin-interfaced		NO	non-enzimatic glucose detection	electrochemical	Electrochemical	The sensor with the porous LIG foam exhibits a high sensitivity of 1080 μA mM1 cm2, whereas a further increased sensitivity of 3500 μA mM1 cm2 is obtained with LIG fibers (LIGF). Impressively, a large linear range (0–30 mM) can be achieved by changing the bias voltage from 0.5 to 0.1 V due to the Au coating.		NA	yes	-	-	sweat					yes								glucose					1	1	Prototype/Validation		In-vitro tests	NA	NA	3D porous LIG foams or fibers on a f lexible, thin-film substrate and electroless plating of Ni and Au for high- performance non-enzymatic glucose sensors	NO	NA	NA	NA	2021	Zhu, J.; Liu, S.; Hu, Z.; Zhang, X.; Yi, N.; Tang, K.; Dexheimer, M. G.; Lian, X.; Wang, Q.; Yang, J.; Gray, J.; Cheng, H.	Laser-induced graphene non-enzymatic glucose sensors for on-body measurements	Biosens Bioelectron
LCQAV858	10.3390/bios12060397	https://www.ncbi.nlm.nih.gov/pubmed/35735545	YES	not specified	Epidermal	NO	monitoring sweat	electrochemical	Electrochemical	The resulting LIG devices can simultaneously monitor the pH, Na+, and K+ levels in sweat with the sensitivities of 51.5 mV/decade (pH), 45.4 mV/decade (Na+), and 43.3 mV/decade (K+), respectively.		NA	yes	-	-	sweat											yes		pH, Na+, K+					1	3	Proof-of-concept	Human	In-vitro + human studies	NA	NA	The device employs a sophisticated electrochemical detection method based on a liquid-gated transistor architecture using rGO as the sensing material and ion-selective membranes for specificity.	NO	NA	NA	NA	2022	Liao, J.; Zhang, X.; Sun, Z.; Chen, H.; Fu, J.; Si, H.; Ge, C.; Lin, S.	Laser-Induced Graphene-Based Wearable Epidermal Ion-Selective Sensors for Noninvasive Multiplexed Sweat Analysis	Biosensors (Basel)
VBL3EPW6	10.3390/s21051847	https://www.ncbi.nlm.nih.gov/pubmed/33800949	YES	foot-worn		NO	monitoring and managing the health of the diabetic foot	electrochemical	Electrochemical (+ Piezoelectric Pressure Sensing and Temperature Sensing)	The disposable glucose sensors exhibit a 0–6 mM (0–108 mg/dL) glucose concentration optimized linear response (for sweat-sensing), with a LOD of 3.27 µM (0.058 mg/dL) and a sensitivity of 21 µA/mM cm2 in the PBS solution.	Diabetes	Diabetes management	yes	-	-	sweat					yes								Glucose					1	1	Prototype		Laboratory testing	NA	NA	A smart multisensory hardware-software monitoring platform for diabetic patients was presented, in which an antibacterial polyurethane-based insole was proposed as a reliable platform for integration of an array of minimally invasive and low power commercial and proprietary sensors distributed on the plantar surface.	NO	NA	YES	NA	2021	De Pascali, C.; Francioso, L.; Giampetruzzi, L.; Rescio, G.; Signore, M. A.; Leone, A.; Siciliano, P.	Modeling, Fabrication and Integration of Wearable Smart Sensors in a Monitoring Platform for Diabetic Patients	Sensors (Basel)
VIUIBGAX	10.1038/srep23111	https://www.ncbi.nlm.nih.gov/pubmed/26996103	YES	skin-attached		NO	monitoring alcohol consumption	Immuneassay	Affinity based immunoassay	EtG detection over a dose concentration of 0.001–100 μg/L was demonstrated on both glass and polyimide substrates. Detection sensitivity was lower at 1 μg/L with gold electrodes as compared to ZnO, which had detection sensitivity of 0.001 μg/L.		NA	yes	-	-	sweat													ethyl glucuronide (EtG)					1	1	Proof-of-concept	Human	Human studies	NA	NA	Two co-planar sensors with gold and zinc oxide as sensing electrodes + a LED based reporting	NO	NA	NA	NA	2016	Selvam, A. P.; Muthukumar, S.; Kamakoti, V.; Prasad, S.	A wearable biochemical sensor for monitoring alcohol consumption lifestyle through Ethyl glucuronide (EtG) detection in human sweat	Sci Rep
5FNXVCDA	10.3390/s24144643	https://www.ncbi.nlm.nih.gov/pubmed/39066041	YES	garments		NO	continuous, non-invasive monitoring of human biomarkers in sweat	Electrical	interdigitated electrodes (IDTs)- resonant frequency,	The sensors operate at frequencies between 1.8 GHz to 2 GHz. They exhibit a sensitivity of 0.17 MHz/(mg/dL) in response to changes in glucose concentration		NA	yes	-	-	sweat					yes								glucose					1	1	Proof-of-concept		Laboratory testing	NA	NA	The use of embroidery techniques to create flexible, fabric-based sensors with gold-coated IDTs represents a significant innovation. The incorporation of a wireless sensing mechanism enables real-time data transmission without the need for wired connections.	NO	NA	NA	NA	2024	Amers, E. L.; Orme, B. V.; Shi, Y.; Torun, H.; Dodd, L. E.	Embroidered Interdigitated Electrodes (IDTs) with Wireless Readout for Continuous Biomarker Monitoring	Sensors (Basel)
D3J6Z5ZD	10.1016/j.bios.2019.111637	https://linkinghub.elsevier.com/retrieve/pii/S095656631930716X	YES	not specified	Gloves	NO	detection of hydrogen peroxide (H2O2) and glucose.	electrochemical	Electrochemical	H2O2 Sensor Sensitivity: PET-based sensor achieves 27.25 μA·mM⁻¹·cm⁻²; the glove-based version has slightly lower sensitivity due to substrate diffusion differences. Glucose Sensor Sensitivity: PET-based sensor reaches 20.22 μA·mM⁻¹·cm⁻², with the glove-based sensor showing consistent linear performance. Low Detection Limits: H2O2 sensor detects as low as 0.65 μM, while the glucose sensor detects…		NA	yes	-	-	sweat					yes								Hydrogen peroxide (H2O2), glucose					1	2	Prototype/Validation		in-vitro + laboratory testing	NA	NA	One-Step Berlin Green Printing: utilizes a unique Berlin green carbon ink for cost-effective, scalable fabrication of sensor arrays via screen-printing. Wearable and Flexible Design: Robust sensors withstand stretching and bending, enabling integration into platforms like nitrile gloves and PET substrates. Wireless Integration: Features wireless data transmission to smartphones for real-time moni…	NO	NA	YES	NA	2019	Ma, Junlin; Jiang, Yu; Shen, Liuxue; Ma, Hongting; Sun, Tongrui; Lv, Fengjuan; Kiran, Almas; Zhu, Nan	Wearable biomolecule smartsensors based on one-step fabricated berlin green printed arrays	Biosensors and Bioelectronics
M4L3IETC	10.1126/scitranslmed.aaf2593	https://www.ncbi.nlm.nih.gov/pubmed/27881826	YES	skin-attached		NO	evaluating athletic performance and monitoring health and disease status (+ sweat volume and rate ).	Colorimetric	Colorimetric	Sensitivity in the reported devices could diagnose hyperglycemia, for example, limit of detection (LOD) = ~200 μM. The device utilizes colorimetric analysis for markers like chloride, hydronium ions, glucose, and lactate. Colorimetric methods rely on color changes to indicate the presence and concentration of analytes. The accuracy of these methods depends on factors like the sensitivity of the c…		NA	yes	-	-	sweat					yes	yes						yes	lactate, chloride, glucose, creatinine					1	4	prototype	Human	Human studies	NA	NA	Soft microfluidics, fully integrated.	NO	NA	YES	NA	2016	Koh, A.; Kang, D.; Xue, Y.; Lee, S.; Pielak, R. M.; Kim, J.; Hwang, T.; Min, S.; Banks, A.; Bastien, P.; Manco, M. C.; Wang, L.; Ammann, K. R.; Jang, K. I.; Won, P.; Han, S.; Ghaffari, R.; Paik, U.; Slepian, M. J.; Balooch, G.; Huang, Y.; Rogers, J. A.	A soft, wearable microfluidic device for the capture, storage, and colorimetric sensing of sweat	Sci Transl Med
VFD5NGQ2	10.1016/j.talanta.2022.123208	https://linkinghub.elsevier.com/retrieve/pii/S0039914022000042	YES	skin-attached		NO	non-invasively collect, store, and analyze sweat for health monitoring.	Colorimetric	Colorimetric	NA (the authors acknowledge that the current method of visual assessment of color change using the naked eye or smartphone images limits the accuracy of the device.They suggest that incorporating photoelectric sensors and AI-based analysis of color changes in future developments could significantly improve the accuracy and enable quantitative measurements of sweat components).		NA	yes	-	-	sweat					yes						yes		glucose, pH					1	2	prototype		in-vitro tests + laboratory testing	NA	NA	Tesla Valve Integration: adapting Tesla valves for a microfluidic chip eliminates moving parts, offering a robust and efficient alternative to traditional microvalves. This is the standout innovation of the device. Novel Microfluidic Design: the device employs a network of microchannels and sweat collection chambers designed for optimized sweat capture and storage. While the design is novel, it u…	NO	NA	NA	NA	2022	Shi, Huanhuan; Cao, Yu; Zeng, Yining; Zhou, Yanuo; Wen, Weihua; Zhang, Congxuan; Zhao, Yali; Chen, Zhen	Wearable tesla valve-based sweat collection device for sweat colorimetric analysis	Talanta
6UAK7XV8	10.1016/j.bios.2024.116430	https://linkinghub.elsevier.com/retrieve/pii/S0956566324004354	YES	patch		NO	efficient collection and transport of small amounts of sweat for analysis.		NA (the sources primarily describe the device's microfluidic design and sweat collection capabilities)	With only 0.5 μl of the sweat secreted at the collection site, it can converge on the detection medium located within the center reservoir.		NA	yes	-	-	sweat													NONE					1	NONE	Proof-of-concept/prototype	Human	laboratory testing + human studies	NA	NA	The most significant cutting-edge innovation in the device is its bio-inspired hierarchical microfluidic design for enhanced sweat collection. This design, inspired by the structure of Sarracenia trichomes, incorporates microchannels with rib structures at the bottom to facilitate rapid and efficient transport of small volumes of sweat.	NO	NA	NO	NA	2024	Wu, Tianjie; Yang, Pufan; Xie, Xintong; Cao, Xi; Deng, Yujun; Ding, Xianting; Zhang, Zhinan	Bio-inspired hierarchical wearable patch for fast sweat collection	Biosensors and Bioelectronics
2J68ABSE	10.1038/s41598-018-33565-x	https://www.ncbi.nlm.nih.gov/pubmed/30367078	YES	patch		NO	detection of analytes	electrochemical	Organic electrochemical transistor (OECT)	Sensing range is limited to lactate concentrations below approximately 1 mM.		NA	yes	-	-	sweat						yes							lactate					1	1	prototype		Laboratory testing	NA	NA	Electronics patch OECT functionalized with lactate oxidase.	NO	NA	NA	NA	2018	Currano, L. J.; Sage, F. C.; Hagedon, M.; Hamilton, L.; Patrone, J.; Gerasopoulos, K.	Wearable Sensor System for Detection of Lactate in Sweat	Sci Rep
WCDCR8PV	10.1016/j.bios.2018.02.025	https://www.ncbi.nlm.nih.gov/pubmed/29471280	YES	patch		NO	sweat pH monitoring	electrochemical	Electrochemical	pH sensitivity of 11.13±5.8 mV/pH with a maximum response time of 8 s.		NA	yes	-	-	sweat											yes		pH					1	1	prototype		Laboratory testing + in-vitro studies	NA	NA	Stretchable wireless system provided by a pair of serpentine-shaped stretchable interconnects. pH sensing electrode made of graphite-polyurethane composite	NO	NA	YES	NA	2018	Dang, W.; Manjakkal, L.; Navaraj, W. T.; Lorenzelli, L.; Vinciguerra, V.; Dahiya, R.	Stretchable wireless system for sweat pH monitoring	Biosens Bioelectron
VEQ5M8AF	10.1002/advs.202203597	https://www.ncbi.nlm.nih.gov/pubmed/35975449	YES	contact lenses		NO	monitoring of cholesterol levels in tear fluid	electrochemical	Electrochemical	This cholesterol biosensor detected the free cholesterol from 0.01 to 1.2 mm (corresponding to 0.4 to 46.4 mg dL–1).This sensor showed high sensitivity with 1% current change per 0.043 mm. The wide linear detection range can cover the physiological tear cholesterol ranges of both healthy humans (≈0.4 mm) and hyperlipidemia patients.The signal-to-noise ratio (SNR) was 4.29 at 0.01 mm (0.4 mg dL–1)…	Metabolic Syndrome	management of hyperlipidemia	-	-	-	tear										yes			cholesterol					1	1	Validation	Human	Animal models + human studies	NA	NA	A wireless and soft smart contact lens that enables real-time quantitative recording of cholesterol in tear fluids for the monitoring of patients with hyperlipidemia using a smartphone is reported. This contact lens incorporates an electrochemical biosensor for the continuous detection of cholesterol concentrations, stretchable antenna, and integrated circuits for wireless communication, which ma…	NO	NA	YES	NA	2022	Song, H.; Shin, H.; Seo, H.; Park, W.; Joo, B. J.; Kim, J.; Kim, J.; Kim, H. K.; Kim, J.; Park, J. U.	Wireless Non-Invasive Monitoring of Cholesterol Using a Smart Contact Lens	Adv Sci (Weinh)
LVZCVZA2	10.1021/acssensors.8b00168	https://pubs.acs.org/doi/10.1021/acssensors.8b00168	YES	wrist-worn		NO	non-enzymatic electrochemical analysis of perspiration glucose	electrochemical	Electrochemical	Reproducibility: the researchers evaluated the sensor's reproducibility by performing replicated measurements on the same perspiration sample. They found a relative standard deviation (RSD) of approximately 7.5% for seven replicate analyses. Long-Term Stability: to assess the sensor's stability over time, they conducted repeated analyses of perspiration glucose over two weeks. The RSD for these m…	Diabetes	diabetes management	yes	-	-	sweat					yes								glucose					1	1	Prototype	Human	Laboratory testing + human studies	NA	NA	The most significant innovation is the use of non-enzymatic electrochemical detection for glucose. This approach overcomes several limitations associated with traditional enzyme-based glucose sensors, particularly in the context of wearable devices. The device employs a novel multipotential step method applied to the gold working electrode to achieve accurate and reliable glucose measurements. Th…	NO	NA	YES	NA	2018	Zhu, Xiaofei; Ju, Yinhui; Chen, Jian; Liu, Deye; Liu, Hong	Nonenzymatic Wearable Sensor for Electrochemical Analysis of Perspiration Glucose	ACS sensors
5K54N2YN	10.1016/j.bios.2020.112450	https://linkinghub.elsevier.com/retrieve/pii/S0956566320304449	YES	patch		NO	non-invasive monitoring of specific biomarkers found in sweat.	Optical	Optical	Chloride Sensor: Linear range: 10–100 mM; Correlation coefficient (r): 0.994; Relative standard deviation: 3.41% for 60 mM chloride; Limit of detection (S/N = 3): 5 mM. pH Sensor: Linear range: 4.1–5.1 and 5.1–6.6; Correlation coefficients (r): 0.982 and 0.988, respectively; Relative standard deviation: 6.28% for pH 5.0; Limit of detection (S/N = 3): Not provided. Volume Sensor: Linear range: 15–…		NA	yes	-	-	sweat					yes	yes					yes		Glucose, Lactate, pH, Chloride, Sweat Volume					1	5	Validation	Human	Human studies	NA	NA	The SWSP doesn't introduce entirely new sensor designs or materials, its strength lies in the creative combination of existing technologies to address the limitations of traditional sweat analysis methods. This integration, coupled with the use of a smartphone platform and custom-developed software, results in a device that is low-cost, portable, user-friendly, and capable of multi-sensing five i…	NO	NA	YES	NA	2020	Ardalan, Sina; Hosseinifard, Mohammad; Vosough, Maryam; Golmohammadi, Hamed	Towards smart personalized perspiration analysis: An IoT-integrated cellulose-based microfluidic wearable patch for smartphone fluorimetric multi-sensing of sweat biomarkers	Biosensors and Bioelectronics
TW8YWWQJ	10.1007/s00216-021-03865-9	https://www.ncbi.nlm.nih.gov/pubmed/35015101	YES	skin-attached		NO	monitor and analyze biomarkers in sweat for healthcare and wellness applications.	electrochemical	Electrochemical	The sensing performance of the device was demonstrated by monitoring sweat glucose, presenting good correlation with blood glucose measurements.		NA	yes	-	-	sweat					yes								glucose					1	1	Proof-of-concept/validation	Human	Human studies	NA	NA	The device represents the frst system integrating an iontophoretic pilocarpine delivery system around the inlet channels of epidermal polydimethylsiloxane (PDMS) microfuidic device for sweat collection and analysis.	NO	NA	YES	NA	2022	Bolat, G.; De la Paz, E.; Azeredo, N. F.; Kartolo, M.; Kim, J.; de Loyola, E. Silva A. N.; Rueda, R.; Brown, C.; Angnes, L.; Wang, J.; Sempionatto, J. R.	Wearable soft electrochemical microfluidic device integrated with iontophoresis for sweat biosensing	Anal Bioanal Chem
LYPA3K6T	10.1038/s41598-021-86931-7	https://www.ncbi.nlm.nih.gov/pubmed/33828144	YES	skin-attached		NO	glucose monitoring	Other	magnetohydrodynamics (MHD)	The results showed that the efficiency of the MHD extraction method is superior to that of reverse iontophoresis. Using a 300 mT magnetic field we achieved a 13-fold increase in active glucose extraction. Furthermore, the amount of extracted glucose was proportional to the glucose concentration in the sample, which is important when considering potential applications in glucose sensing where the …	Diabetes	diabetes management	-	-	yes	interstitial fluid					yes								glucose					1	1	Proof-of-concept		Ex-vivo testing	NA	NA	Use of magnetohydrodynamics (MHD) for extracting interstitial fluid through the skin	GlucoModicum Ltd	Helsinki, Finland.	NA	NA	2021	Hakala, T. A.; Garcia Perez, A.; Wardale, M.; Ruuth, I. A.; Vanska, R. T.; Nurminen, T. A.; Kemp, E.; Boeva, Z. A.; Alakoskela, J. M.; Pettersson-Fernholm, K.; Haeggstrom, E.; Bobacka, J.	Sampling of fluid through skin with magnetohydrodynamics for noninvasive glucose monitoring	Sci Rep
66IIGTSV	10.1016/j.bios.2021.113530	https://linkinghub.elsevier.com/retrieve/pii/S0956566321005674	YES	patch		NO	"turn-on" detection of specific biomarkers in sweat	Optical	Optical	Limit of Detection (LOD): The source mentions that for uric acid detection, the LOD was determined to be 136 nM. The LOD represents the lowest concentration of an analyte that can be reliably distinguished from the background noise. This value provides an indication of the sensor's sensitivity towards uric acid. Linear Ranges: The source provides linear ranges for each analyte, indicating the con…	Metabolic Syndrome	monitoring metabolic conditions	yes	-	-	sweat					yes			yes					Uric acid, Glucose, Alcohol					1	3	Proof-of-concept	Human	laboratory testing + human studies (preliminary)	NA	NA	Enzyme-Embedded AuNC Assemblies: Combines enzymes for high specificity with gold nanoclusters (AuNCs) acting as luminophores, enabling selective, color-based detection of uric acid, glucose, and alcohol in sweat. MnO2 Nanosheets as a Luminescence Switch: Employs MnO2 nanosheets to quench AuNC luminescence, which is restored upon enzymatic degradation, enhancing sensitivity at low analyte concentr…	NO	NA	YES	NA	2021	Zhou, Ziping; Shu, Tong; Sun, Yafang; Si, Hongxin; Peng, Peiwen; Su, Lei; Zhang, Xueji	Luminescent wearable biosensors based on gold nanocluster networks for “turn-on” detection of Uric acid, glucose and alcohol in sweat	Biosensors and Bioelectronics
XZKVMMFJ	10.1002/adma.202304704	https://www.ncbi.nlm.nih.gov/pubmed/37709513	YES	patch	microneedle skin-attached	YES	continuous sampling and sensing of dermal interstitial fluid (ISF)	electrochemical	Electrochemical	The sensitivity and limit of detection (LOD= 3.3𝜎/S, where 𝜎 is the standard deviation of sensor response, and S is the slope of the calibration curve) of the electrode at low glucose concentrations (20-1000 μM) were 0.254 μA mM−1 and 5.6 μM, respectively. Subsequently, the sensor response was examined for glucose concertation ranging from 3 to 15 mM, relevant to the physiological glucose concent…		NA	-	-	yes	dermal interstitial fluid					yes						yes		glucose, pH					1	2	Proof-of-concept		In-vitro, ex-vivo, in-vivo (animal models)	NA	NA	a fully integrated touch-activated wearable device based on a laser-drilled hollow microneedle (HMN) patch for continuous sampling and sensing of dermal ISF is introduced. The developed platform can produce and maintain the required vacuum pressure (as low as ≈ -53 kPa) to collect adequate volumes of ISF (≈2 µL needle-1 h-1 ) for medical applications. The vacuum system can be activated through a …	NO	NA	NA	NA	2024	Abbasiasl, T.; Mirlou, F.; Mirzajani, H.; Bathaei, M. J.; Istif, E.; Shomalizadeh, N.; Cebecioglu, R. E.; Ozkahraman, E. E.; Yener, U. C.; Beker, L.	A Wearable Touch-Activated Device Integrated with Hollow Microneedles for Continuous Sampling and Sensing of Dermal Interstitial Fluid	Adv Mater
7ZN7U6CB	10.1002/advs.202104635	https://www.ncbi.nlm.nih.gov/pubmed/35088587	YES	skin-attached		NO	monitoring sweat	electrochemical	Electrochemical	the voltages of the glucose sensors are linearly proportional to the glucose concentrations with a determination coefficient (R2) of 0.998. An excellent linear relationship between the OCV (versusAg/AgCl) of the Na+ sensor and the value of the logarithm of Na+ concentration, with an excellent R2 of 0.994 that corresponds to a sensitivity of 131.95 mV per decade of concentration for Na+. A near-Ne…		NA	yes	-	-	sweat					yes						yes		pH, glucose, Na+					1	3	Proof-of-concept	Human	Human studies	NA	NA	Sweat-activated batteries (SABs) for powering microfluidic system based sweat sensors are realized in this work, allowing real-time monitoring of pH, glucose, and Na+ in sweat.	NO	NA	NA	NA	2022	Liu, Y.; Huang, X.; Zhou, J.; Yiu, C. K.; Song, Z.; Huang, W.; Nejad, S. K.; Li, H.; Wong, T. H.; Yao, K.; Zhao, L.; Yoo, W.; Park, W.; Li, J.; Huang, Y.; Lam, H. R.; Song, E.; Guo, X.; Wang, Y.; Dai, Z.; Chang, L.; Li, W. J.; Xie, Z.; Yu, X.	Stretchable Sweat-Activated Battery in Skin-Integrated Electronics for Continuous Wireless Sweat Monitoring	Adv Sci (Weinh)
XG22VQQK	10.1039/d3mh00989k	https://www.ncbi.nlm.nih.gov/pubmed/37725333	YES	smart sensing garment/electrochemical sensing fibers		NO	Sweat Capture and Biomarker Monitoring	electrochemical	Electrochemical	The sensitivity for glucose and lactate is calculated as 6 nA mM1 and 69 nA mM1, respectively. The limit of detection (LOD) for those two biomarkers is calculated as 4.55 and 11.49 mM, respectively. Fig. 4c–e displays the potential response variation of the Na+, Ca2+, and K+ sensing fibres in electrolyte solutions with concentrations of 10–160 mM, 4–8 mM, and 2–32 mM, respectively. Based on ion-s…		NA	yes	-	-	sweat					yes	yes					yes		glucose, lactate, Na+, K+, Ca2+, and pH					1	6	Prototype/Validation	Human	In-situ (human) + ex-situ	NA	NA	Electrochemical sensing fiber with a special core-sheath structure, whose outer layer is wound by nanofibers with a hierarchical Fermat helix structure which has excellent moisture conductivity, and the inner layer is based on CNT fibers covered by three-dimensional reduced graphene oxide folds which have good sensing properties after modification of active materials such as enzymes and selective…	NO	NA	NA	NA	2023	Tian, H.; Wang, L.; Yang, W.; Li, K.; Zhang, Q.; Li, Y.; Wang, H.; Hou, C.	Hierarchical Fermat helix-structured electrochemical sensing fibers enable sweat capture and multi-biomarker monitoring	Mater Horiz
PDVI6XMA	10.3390/s22218223	https://www.ncbi.nlm.nih.gov/pubmed/36365929	YES	skin-attached		NO	chloride detection in sweat	electrochemical	Electrochemical	The devices with PLA membrane exhibit a peak current density of 165 µA µM−1 cm−2 ± 4.8%. This is a very good result that shows both the reproducibility of the device (both in terms of fabrication and operation) and, again, the negligible interference of the PLA membrane on the operation of the device. The standard deviation of the proposed system is about 4.5% and possesses a very high selectivit…		NA	yes	-	-	sweat													chloride					1	1	Prototype	Human	Human studies	NA	NA	A green wearable sensor for sweat absorption and chloride sensing is presented. In order to produce a sustainable device, polylactic acid (PLA) was used for both the substrate and the sweat absorption pad fabrication. The sensor material for chloride detection consisted of silver-based reference, working, and counter electrodes obtained from upcycled compact discs.	NO	NA	NA	NA	2022	Lopresti, F.; Patella, B.; Divita, V.; Zanca, C.; Botta, L.; Radacsi, N.; O'Riordan, A.; Aiello, G.; Kersaudy-Kerhoas, M.; Inguanta, R.; La Carrubba, V.	Green and Integrated Wearable Electrochemical Sensor for Chloride Detection in Sweat	Sensors (Basel)
IHL6CF6F	10.1016/j.talanta.2022.123697	https://www.ncbi.nlm.nih.gov/pubmed/35752089	YES	skin-attached		NO	detection of biomarkers in undiluted tears in the eye.		electronic detection (graphene field-effect transistor (FET) nanosensor)	Limit of detection of 0.34 pM for tumor necrosis factor alpha (TNF-alpha) in undiluted artificial tears		NA	-	-	-	undiluted artificial tears											yes		Tumor necrosis factor alpha (TNF-alpha)					1	1	Proof-of-concept		In-vitro tests	NA	NA	The nanosensor is a graphene field-effect transistor, in which a nucleic acid aptamer and a biomolecule-permeable polyethylene glycol (PEG) nanolayer are immobilized on the graphene surface.	NO	NA	NA	NA	2022	Wang, Z.; Dai, W.; Yu, S.; Hao, Z.; Pei, R.; De Moraes, C. G.; Suh, L. H.; Zhao, X.; Lin, Q.	Towards detection of biomarkers in the eye using an aptamer-based graphene affinity nanobiosensor	Talanta
RUEKFCSI	10.1126/sciadv.aaw9906	https://www.ncbi.nlm.nih.gov/pubmed/31453333	YES	patch	skin-attached	NO	sweat monitoring	electrochemical	Electrochemical	the general performance of a Na+ sensor in 15 to 120 mM NaCl solutions. The sensor remains stable throughout the measurement period with a sensitivity of 56.2 mV/decade, similar to sensitivities achieved by lithography-based Na+ sensors and close to the Nernstian ideal. Similarly, the K+ sensor shows a sensitivity of 51.3 mV/decade in standard solution of 5 to 40 mM KCl. The enzymatic glucose sen…		NA	yes	-	-	sweat					yes								Na+, K+, Glucose, (+ Sweat Rate)					1	3	prototype	Human	Human studies	NA	NA	The microfluidic sensing patches are mass-fabricated using R2R processes.	NO	NA	YES	YES	2019	Nyein, H. Y. Y.; Bariya, M.; Kivimaki, L.; Uusitalo, S.; Liaw, T. S.; Jansson, E.; Ahn, C. H.; Hangasky, J. A.; Zhao, J.; Lin, Y.; Happonen, T.; Chao, M.; Liedert, C.; Zhao, Y.; Tai, L. C.; Hiltunen, J.; Javey, A.	Regional and correlative sweat analysis using high-throughput microfluidic sensing patches toward decoding sweat	Sci Adv
5YGDVSZT	10.3390/s22228971	https://www.ncbi.nlm.nih.gov/pubmed/36433566	YES	skin-attached		NO		electrochemical	Electrochemical	The device is selective for glucose, and it detected glucose accurately in the clinically relevant range (0~2 mM) in an off-body setup. Acceptable sensitivity of 16.8 µA/mM/cm2.		NA	yes	-	-	sweat					yes								glucose					1	1	Proof-of-concept	Human	Human studies	NA	NA	Three-dimensional paper-based microfluidic electrochemical integrated device (3D PMED) for measuring glucose concentration in sweat in real-time via simple, non-invasive, capillary-action-based sample collection.	NO	NA	NA	NA	2022	Noura, Z.; Shah, I.; Aziz, S.; Ahmed, A.; Jung, D. W.; Brahim, L.; ElMostafa, R.	Wearable Healthcare Monitoring Based on a Microfluidic Electrochemical Integrated Device for Sensing Glucose in Natural Sweat	Sensors (Basel)
INWRMTEV	10.1039/d4ra00110a	https://www.ncbi.nlm.nih.gov/pubmed/38414985	YES	Electrochemical sensor	microneedle	Minimally	real-time, continuous monitoring of dopamine levels	electrochemical	Electrochemical	The limit of detection (LOD) of the developed sensor was observed to be low, 90 nM in square wave voltammetry and 0.6 μM in chronoamperometric analysis.		NA	-	-	yes	interstitial fluid													Dopamine					1	1	Prototype/Validation		In-vitro	NA	NA	A wearable microneedle-based electrochemical sensor, to continuously monitor dopamine in interstitial fluid (ISF). A chitosan-protected hybrid nanomaterial Fe3O4-GO composite has been used as a chemical recognition element protected by Nafion antifouling coating layer.	NO	NA	NA	NA	2024	M, R. K.; Panicker, L. R.; Narayan, R.; Kotagiri, Y. G.	Biopolymer-protected graphene-Fe(3)O(4) nanocomposite based wearable microneedle sensor: toward real-time continuous monitoring of dopamine	RSC Adv
8YAPSY3W	10.3390/s23239473	https://www.ncbi.nlm.nih.gov/pubmed/38067846	YES	chest band		NO	real-time monitoring of athletes' physiological status and performance	electrochemical	Electrochemical	The lactate sensor used in this device is an enzyme-based amperometric sensor that combines the specificity and selectivity of enzymes with the high sensitivity of electrochemical sensing.		NA	yes	-	-	sweat						yes							lactate, electrolytes (e.g. Na+) for characterization. NOT WELL SPECIFIED					1	multiple? NOT WELL SPECIFIED)	Validation	Human	In-vitro + in-vivo (human)	NA	NA	a wearable device designed for continuous athlete monitoring in real time through sweat analysis. This innovative system utilizes a conventional sports band that incorporates a single-use cartridge capable of collecting, processing, and analyzing sweat from the user’s skin, all thanks to an array of sensors integrated into this disposable.	Onalabs Inno-Hub SL	Spain	YES	NA	2023	Aguilar-Toran, J.; Rabost-Garcia, G.; Toinga-Villafuerte, S.; Alvarez-Carulla, A.; Colmena-Rubil, V.; Fajardo-Garcia, A.; Cardona-Bonet, A.; Casals-Terre, J.; Munoz-Pascual, X.; Miribel-Catala, P.; Punter-Villagrasa, J.	Novel Sweat-Based Wearable Device for Advanced Monitoring of Athletic Physiological Biometrics	Sensors (Basel)
NNP742K2	10.1039/d1an00283j	https://www.ncbi.nlm.nih.gov/pubmed/33999074	YES	not specified		NO	detection of glucose levels in sweat	Colorimetric	Colorimetric	LOD of 0.01 mM and a dynamic range up to 0.15 mM.		NA	yes	-	-	sweat					yes								glucose					1	1	Validation	Human	Human studies	NA	NA	Colorimetric wearable biosensors that detect glucose in sweat with a low LOD. The devices are made of filter paper and incorporate a sweat volume sensor and a color chart for signal correction. The biosensors do not suffer from interferences originated by delayed sample readings, or differences in bending angle and sample pH.	NO	NA	YES	NA	2021	Vaquer, A.; Baron, E.; de la Rica, R.	Detection of low glucose levels in sweat with colorimetric wearable biosensors	Analyst
6EDNGGXD	10.1021/acs.analchem.2c01052	https://www.ncbi.nlm.nih.gov/pubmed/35486709	YES	skin-attached		NO	continuous monitoring of sweat conductivity and collection of sweat samples for offline analysis	electrochemical	Electrochemical	A strong linear relationship (R² = 0.97) between the patch's conductivity readings and the laboratory measurements of Na+ and Cl- concentrations		NA	yes	-	-	sweat													Na+, Cl-					1	2	Validation	Human	Human studies	NA	NA	An easy-to-fabricate sweat collection system that allows for continuous electrochemical monitoring, as well as chronological sampling of sweat for offline analysis.The patch consists of ananalysis chamber hosting aconductivity sensor and a sequence of 5 to 10 reservoirs that contain level indicators that monitor the filling speed.	NO	NA	NA	NA	2022	Steijlen, A. S. M.; Jansen, K. M. B.; Bastemeijer, J.; French, P. J.; Bossche, A.	Low-Cost Wearable Fluidic Sweat Collection Patch for Continuous Analyte Monitoring and Offline Analysis	Anal Chem
34H6UIRI	10.1186/s12951-019-0480-4	https://www.ncbi.nlm.nih.gov/pubmed/30914060	YES	not specified		NO	sweat monitoring	Conductivity	Electrical conductivity	The achieved sensors demonstrate good performance of moisture monitoring and sensitive salt responses with stability and reproducibility. The output current signal increases in a monotonous manner when rising the relative humidity, and the largest responsivity is 244% which is acquired at 80% RH in dark. T he goodness of fit R2 by linear line for the resistancehumidity curve of the sensor is 0.97…		NA	yes	-	-	sweat													water content (moisture)	NaCl				1	2	validation	Human	Human studies	NA	NA	The sensor utilizes a unique composition-graded CdS1-xSex (x = 0-1) nanowire chip. This means that the composition of the CdSSe nanowires varies along their length, creating a gradient of material properties.	NO	NA	NA	NA	2019	Zhang, M.; Guo, S.; Weller, D.; Hao, Y.; Wang, X.; Ding, C.; Chai, K.; Zou, B.; Liu, R.	CdSSe nanowire-chip based wearable sweat sensor	J Nanobiotechnology
RTVB98DV	10.1039/d1an02214h	https://www.ncbi.nlm.nih.gov/pubmed/35262099	YES	skin-attached		NO	monitoring of glucose levels in human sweat	electrochemical	Electrochemical	The sensor exhibits a wide linear range of 20 μM to 790 μM for glucose detection. The sensor boasts a high sensitivity of 205.1 μA mM-1 cm-2.	Diabetes	Diabetes management	yes	-	-	sweat					yes								glucose					1	1	Prototype/Validation	Human	Human studies	NA	NA	A wearable electrochemical sweat sensor based on a Ni-Co MOF nanosheet coated Au/polydimethylsiloxane (PDMS) film was prepared for continuous monitoring of the glucose level in sweat with high sensitivity.	NO	NA	NA	NA	2022	Shu, Y.; Shang, Z.; Su, T.; Zhang, S.; Lu, Q.; Xu, Q.; Hu, X.	A highly flexible Ni-Co MOF nanosheet coated Au/PDMS film based wearable electrochemical sensor for continuous human sweat glucose monitoring	Analyst
ALE8BTQJ	10.1002/smll.202311802	https://onlinelibrary.wiley.com/doi/10.1002/smll.202311802	YES	skin-attached		NO	noninvasive, real-time monitoring of potassium ion (K+) concentration in human sweat	electrochemical	Electrochemical	The source states the wearable K+ sensor has a high sensitivity of 62 mV decade-1. This means the sensor can detect subtle changes in K+ concentration and is therefore very precise. The sensor also has a low detection limit of 0.05 mm. These values, combined with the sensor's good selectivity and stability, indicate the device is capable of collecting accurate and reliable K+ concentration data.		NA	yes	-	-	sweat													K+					1	1	Validation	Human	Laboratory testing + human studies (preliminary)	NA	NA	The main cutting-edge innovation in the wearable K+ sensor is the tailored design and fabrication of polypyrrole (PPy) nanofibers to serve as the ion-to-electron transduction layer. This nanofiber structure offers several advantages over traditional conductive polymer membranes, enhancing the sensor's performance.	NO	NA	NA	NA	2024	Yang, Yaqiong; Lv, Tian‐Run; Zhang, Wen‐Hai; Zhang, Jia‐Yue; Yin, Ming‐Jie; An, Quan‐Fu	Tailored Polypyrrole Nanofibers as Ion‐to‐Electron Transduction Membranes for Wearable K<sup>+</sup> Sensors	Small
WK6BCNCY	10.3390/bios13010105	https://www.ncbi.nlm.nih.gov/pubmed/36671938	YES	common rubber glove		NO	simultaneous detection of uric acid and glucose levels in sweat	electrochemical	Electrochemical	The sensors exhibited the linear range from 0 to 1.6 mM and 0 to 3.7 mM towards uric acid and glucose electrochemical sensing in phosphate-buffered solution, with the corresponding limit of detection of 3.58 μM and 9.10 μM obtained, respectively. Moreover, the sensors had shown their feasibility of real sample sensing in sweat. The linear detection range for uric acid (0 to 40 μM) and glucose (0 …		NA	yes	-	-	sweat					yes			yes					uric acid, glucose					1	2	Proof-of-concept/prototype		In-vitro tests	NA	NA	A dual-function wearable electrochemical sensor for uric acid and glucose detection in sweat. The sensor with a four-electrode system was prepared by printing the ink on a common rubber glove. CV and chronoamperometry were used to characterize the prepared sensor's electrochemical sensing performance.	NO	NA	NA	NA	2023	Li, Z.; Wang, Y.; Fan, Z.; Sun, Y.; Sun, Y.; Yang, Y.; Zhang, Y.; Ma, J.; Wang, Z.; Zhu, Z.	A Dual-Function Wearable Electrochemical Sensor for Uric Acid and Glucose Sensing in Sweat	Biosensors (Basel)
4XGQGTWE	10.1021/acs.analchem.9b03110	https://www.ncbi.nlm.nih.gov/pubmed/31553565	YES	skin-attached		NO	monitoring of glucose levels in sweat	Optical	Optical	The device demonstrates a linear response to glucose concentrations ranging from 0.1 to 0.5 mM, with a detection limit of 0.03 mM.			yes	-	-	sweat					yes								glucose					1	1	prototype	Human	Human studies	NA	NA	Colorimetric detection method using the GOD-peroxidase-o-dianisidine system is presented as a more sensitive approach compared to the conventional GOD-peroxidase-KI system.	NO	NA	NA	NA	2019	Xiao, J.; Liu, Y.; Su, L.; Zhao, D.; Zhao, L.; Zhang, X.	Microfluidic Chip-Based Wearable Colorimetric Sensor for Simple and Facile Detection of Sweat Glucose	Anal Chem
VDCRBS5S	10.1021/acsami.1c11446	https://www.ncbi.nlm.nih.gov/pubmed/34340308	YES	skin-attached		NO	monitoring sweat	Optical	Optical	The responses of both biosensors showed good linearity, between 0.1 and 1.0 mM, for lactate and between 0.1 and 0.8 mM for glucose. The dependency between the sensor response and lactate or glucose concentration can be approximated by a linear function with a correlation factor R2 of 0.981 for lactate and 0.989 for glucose. The statistical limit of detection (LOD) was 0.069 mM with a limit of qua…		NA	yes	-	-	sweat					yes	yes							glucose, lactate					1	2	Proof-of-concept		In-vitro tests	NA	NA	A novel three-dimensional titanium dioxide nanotubes/alginate hydrogel scaffold is proposed for the detection of sweat biomarkers, lactate, and glucose in artificial sweat.	NO	NA	NA	NA	2021	Gunatilake, U. B.; Garcia-Rey, S.; Ojeda, E.; Basabe-Desmonts, L.; Benito-Lopez, F.	TiO(2) Nanotubes Alginate Hydrogel Scaffold for Rapid Sensing of Sweat Biomarkers: Lactate and Glucose	ACS Appl Mater Interfaces
5IXMVHDJ	10.1038/s41598-017-02133-0	https://www.ncbi.nlm.nih.gov/pubmed/28512341	YES	not specified	nanoporous, flexible polymer membranes	NO	detection of analytes	Immuneassay	Immunoassay	IL-6 over 0.2–200 pg/ mL in human sweat 10 hours post-antibody sensor functionalization.		NA	yes	-	-	sweat							yes						IL-6, cortisol					1	2	prototype		Laboratory testing + in-vitro studies	NA	NA	Sensors on nanoporous polymer membranes antibody-functionalized with room temperature ionic liquids (RTILs)	NO	NA	NA	NA	2017	Munje, R. D.; Muthukumar, S.; Jagannath, B.; Prasad, S.	A new paradigm in sweat based wearable diagnostics biosensors using Room Temperature Ionic Liquids (RTILs)	Sci Rep
GKNF76ZE	10.1016/j.bios.2016.09.038	https://www.ncbi.nlm.nih.gov/pubmed/27743863	YES	patch		NO	continuous, non-invasive monitoring of biomarkers in sweat	electrochemical	Electrochemical	Na+ and pH sensors had relative standard deviations (R.S.D.) ~0.6% and the lactate sensor has RSD of ~4% in sensitivity. Sensitivity of the pH sensor is 71.90±0.8 mV/unit and for [Na+]is 56±1mV/unit. Long-term studies showed stability and repeatability of over 8 months for the pH sensor, over 5 weeks for the sodium sensor and over 4 weeks for the enzymatic sensor if kept properly.		NA	yes	-	-	sweat					yes	yes					yes		lactate, K+, Glucose, pH					1	4	prototype	Human	Human studies	NA	NA	Microfluidic platform, fully integrated. Wireless for data transmission.	NO	NA	NA	NA	2017	Anastasova, S.; Crewther, B.; Bembnowicz, P.; Curto, V.; Ip, H. M.; Rosa, B.; Yang, G. Z.	A wearable multisensing patch for continuous sweat monitoring	Biosens Bioelectron
YCWTJYK2	10.1002/cphc.201701312	https://chemistry-europe.onlinelibrary.wiley.com/doi/10.1002/cphc.201701312	YES	wrist-worn	smartwatch-like	NO	real-time monitoring of sodium levels in sweat.	electrochemical	Electrochemical	Reproducibility: Consistent responses across calibrations, with similar results for both single and batch ISE-REs. Linearity: Near-Nernstian slope of ~57 mV/decade ensures accurate sodium quantification over a wide range. Rapid Response: Stabilization within seconds allows real-time monitoring of dynamic sodium level changes. Calibration Stability: Maintains stable response characteristics during…		NA	yes	-	-	sweat													Na+					1	1	Validation	Human	laboratory testing + human studies	NA	NA	3D Printing: Simplifies and accelerates fabrication while enabling precise component alignment and a larger reservoir for extended monitoring. Thread Microfluidics: Employs passive sweat wicking through hydrophilic threads, allowing tunable flow rates without external pumps for energy efficiency. Compact ISE-RE Design: Combines solid-state ion-selective and reference electrodes into a miniaturize…	NO	NA	NA	NA	2018	McCaul, Margaret; Porter, Adam; Barrett, Ruairi; White, Paddy; Stroiescu, Florien; Wallace, Gordon; Diamond, Dermot	Wearable Platform for Real‐time Monitoring of Sodium in Sweat	ChemPhysChem
ZVVI72SE	10.1021/acsami.4c10033	https://www.ncbi.nlm.nih.gov/pubmed/39178237	YES	skin-attached		NO	real-time, noninvasive monitoring of health-associated biochemical parameters in sweat	electrochemical	Electrochemical	The molecularly imprinted biosensor can achieve sensitive and specific detection of cortisol at concentrations as low as 1 pM, 1000-fold lower than previously reported MIP cortisol sensors.		NA	yes	-	-	sweat							yes						Cortisol, Na+					1	2	Proof-of-concept	Human	In-situ (human)	NA	NA	This sensor design utilizes MIPs, which are synthetic polymers with specific recognition sites for target molecules. In this case, the MIP is designed to bind selectively to cortisol, enabling highly sensitive and specific detection. This approach eliminates the need for labels or redox probes commonly used in other electrochemical sensors, enhancing the sensitivity and simplifying the detection …	NO	NA	NA	NA	2024	Garg, M.; Guo, H.; Maclam, E.; Zhanov, E.; Samudrala, S.; Pavlov, A.; Rahman, M. S.; Namkoong, M.; Moreno, J. P.; Tian, L.	Molecularly Imprinted Wearable Sensor with Paper Microfluidics for Real-Time Sweat Biomarker Analysis	ACS Appl Mater Interfaces
SWC7JXLD	10.1002/adma.201707442	https://www.ncbi.nlm.nih.gov/pubmed/29663538	YES	patch		NO	drug monitoring	electrochemical	Electrochemical	There is a linear relationship of the sensor’s responses to the caffeine concentrations with a highsensitivity of 110 nA mm−1		NA	yes	-	-	sweat													Methylxanthine (Caffeine)					1	1	prototype	Human	Human studies	NA	NA	Electrochemical Differential Pulse Voltammetry Sensing Module	NO	NA	NA	NA	2018	Tai, L. C.; Gao, W.; Chao, M.; Bariya, M.; Ngo, Q. P.; Shahpar, Z.; Nyein, H. Y. Y.; Park, H.; Sun, J.; Jung, Y.; Wu, E.; Fahad, H. M.; Lien, D. H.; Ota, H.; Cho, G.; Javey, A.	Methylxanthine Drug Monitoring with Wearable Sweat Sensors	Adv Mater
RKP65NT7	10.1007/s00216-022-04510-9	https://www.ncbi.nlm.nih.gov/pubmed/36622394	YES	textile		NO	real-time sweat analysis and the prediction of physiological parameters.	electrochemical	Electrochemical	The all-in-one sensor integrated all the functions exhibite UA sensitivity of 0.62 ± 0.1 nA/µM and Na+ ion sensitivity of 43.1 ± 3.5 mV/decade in the artificial sweat, the performance of which can meet requirements for on-body applications. The fluid delivery capability of its internal microfluidic channel for cleaning the sensing surface has also been confirmed. In addition, all the functional c…		NA	yes	-	-	sweat								yes					Na+, Uric Acid (UA)					1	2	Prototype/Validation		Laboratory testing + in-vitro tests	NA	NA	A flexible microelectronic fiber with bioanalytical functions that could be woven into textiles as a new form of wearable bioelectronics. Within a single strand of fiber, we successfully integrated all-in-one multiplexed electrochemical sensing capabilities, with the sweat as the primary object. Adopting the laser micromachining technique, we developed biosensing functions on the longitudinal sur…	NO	NA	NA	NA	2023	Wu, J.; Sato, Y.; Guo, Y.	Microelectronic fibers for multiplexed sweat sensing	Anal Bioanal Chem
74YJ6EGN	10.3390/bios13020184	https://www.ncbi.nlm.nih.gov/pubmed/36831950	YES	skin-attached		NO	detection of cortisol levels in human sweat- monitoring of stress levels	Optical	localized surface plasmon resonance (LSPR)	The biosensor exhibits a detection limit of 0.1 nM for cortisol. The device was tested in cortisol solutions with concentrations ranging from 0.1 to 1000 nM, demonstrating its ability to quantify cortisol across a wide range of concentrations.		NA	yes	-	-	sweat							yes						cortisol					1	1	Prototype/Validation	Human	In-vitro + human studies	NA	NA	A flexible LSPR biosensor was manufactured to detect cortisol levels in the human body by depositing gold nanoparticle (AuNP) layers on a 3-aminopropyltriethoxysilane (APTES)-functionalized poly (dimethylsiloxane) (PDMS) substrate. Subsequently, an aptamer was immobilized on the surface of the LSPR substrate, enabling highly sensitive and selective cortisol capture owing to its specific cortisol …	NO	NA	NA	NA	2023	Nan, M.; Darmawan, B. A.; Go, G.; Zheng, S.; Lee, J.; Kim, S.; Lee, T.; Choi, E.; Park, J. O.; Bang, D.	Wearable Localized Surface Plasmon Resonance-Based Biosensor with Highly Sensitive and Direct Detection of Cortisol in Human Sweat	Biosensors (Basel)
XGB4JHY2	10.1016/j.bios.2020.112782	https://linkinghub.elsevier.com/retrieve/pii/S0956566320307697	YES	skin-attached		NO	real-time on-body sweat cortisol detection	electrochemical	Electrochemical	Cortisol sensor: the sensor exhibits a linear response to cortisol concentrations ranging from 0 to 500 nM. The limit of detection (LOD) for cortisol is estimated to be ~7.47 nM. This suggests that the cortisol sensor can reliably detect cortisol levels within the typical range found in sweat (22 nM to 386 nM).		NA	yes	-	-	sweat					yes		yes						Cortisol, Glucose					1	2	Validation	Human	Human studies	NA	NA	The patch is integrated with all-printed flexible electrochemical immunosensor, which was used to detect cortisol through differential pulse voltammetry (DPV). The near field communication (NFC) module on the patch enables wireless power harvesting and data interaction with an NFC-enabled smartphone, which makes the patch get rid of rigid batteries and realize epidermal on-body testing.	NO	NA	YES	NA	2021	Cheng, Chen; Li, Xin; Xu, Gang; Lu, Yanli; Low, Sze Shin; Liu, Guang; Zhu, Long; Li, Caidong; Liu, Qingjun	Battery-free, wireless, and flexible electrochemical patch for in situ analysis of sweat cortisol via near field communication	Biosensors and Bioelectronics
AXIHAVDI	10.1038/s41587-019-0321-x	https://www.ncbi.nlm.nih.gov/pubmed/31768044	YES	patch		NO	simultaneous sweat sampling, chemical sensing and vital-sign monitoring	electrochemical	Electrochemical.	We determined the accuracy of the wearable sensor for analyzing raw sweat samples using high-performance liquid chromatography (HPLC) and commercial colorimetric assay kits and obtained high Pearson correlation coefficients of 0.963 and 0.965 for UA and Tyr sensing, respectively, suggesting the reliability of the sensor measurements.			yes	-	-	sweat								yes					uric acid, tyrosin					1	2	Validation	Human	Human studies	NA	NA	The entire sensor, including the microfluidic channels for sweat sampling and the sensing components, is fabricated using a laser-engraving process	NO	NA	NA	NA	2020	Yang, Y.; Song, Y.; Bo, X.; Min, J.; Pak, O. S.; Zhu, L.; Wang, M.; Tu, J.; Kogan, A.; Zhang, H.; Hsiai, T. K.; Li, Z.; Gao, W.	A laser-engraved wearable sensor for sensitive detection of uric acid and tyrosine in sweat	Nat Biotechnol
AHVPZ34C	10.1016/j.talanta.2022.123481	https://linkinghub.elsevier.com/retrieve/pii/S0039914022002776	YES	skin-attached		NO	monitoring of pH and K+	electrochemical	Electrochemical	pH Sensitivity: the pH sensor exhibits a sensitivity of 54 mV/dec when tested using a traditional electrode setup (β-CD/RGO/GCE). This value is close to the theoretical Nernst response for a pH electrode, indicating a high level of sensitivity to changes in pH. The sensitivity of the flexible pH electrode (β-CD/RGO/CC ink/PET) integrated into the wearable device is slightly lower, ranging from 48…		NA	yes	-	-	sweat											yes		pH, K+					1	2	validation	Human	Human studies	NA	NA	The sensor was composed of flexible reference electrode, pH response electrode and K+ selective electrode, which were prepared through printing β-CD functionalized graphene (β-CD/RGO) water suspension on conductive PET substrate with microelectronic printer.	NO	NA	NA	NA	2022	Cui, Xiaoqing; Bao, Yu; Han, Tingting; Liu, Zhenbang; Ma, Yingming; Sun, Zhonghui	A wearable electrochemical sensor based on β-CD functionalized graphene for pH and potassium ion analysis in sweat	Talanta
7GJ6KKK8	10.1038/s41598-024-62236-3	https://www.ncbi.nlm.nih.gov/pubmed/38773136	YES	skin-attached		NO	monitoring the levels of certain ions and pH in human sweat.	electrochemical	Potentiometry	Na+ sensor sensitivity: 59.7 ± 0.8 mV/decade; K+ sensor sensitivity: 57.8 ± 0.9 mV/decade; pH sensor sensitivity: 54.7 ± 0.6 mV/pH		NA	yes	-	-	sweat											yes		Na+, K+, pH					1	3	Prototype/Validation	Human	Human studies	NA	NA	Flexible substrates in the sensor's construction, allowing it to conform to the contours of the body for comfortable and unobtrusive wearing. This design is essential for a device intended for continuous or real-time monitoring of sweat composition during daily activities or exercise.The device is equipped with wireless communication capabilities,	NO	NA	YES	NA	2024	Jalal, N. R.; Madrakian, T.; Ahmadi, M.; Afkhami, A.; Khalili, S.; Bahrami, M.; Roshanaei, M.	Wireless wearable potentiometric sensor for simultaneous determination of pH, sodium and potassium in human sweat	Sci Rep
FTD47T4B	10.1016/j.bios.2024.116662	https://linkinghub.elsevier.com/retrieve/pii/S0956566324006687	YES	skin-attached		NO	monitoring of specific biomarkers in sweat	Raman	Surface-Enhanced Raman Spectroscopy (SERS)	The SERS biosensor can detect creatinine and UA at concentrations as low as 10-8 M in both artificial and real sweat samples. The sensor exhibits a strong linear correlation between SERS intensity and the logarithm of analyte concentration over a specific range. This range is not explicitly stated in the sources, but linear regression curves are provided for both creatinine and UA. The device can…		NA	yes	-	-	sweat								yes				yes	creatinine, uric acid (UA)					1	2	Validation	Human	in-vitro tests + laboratory testing + human studies	NA	NA	The wearable SERS biosensor for sweat creatinine and uric acid monitoring integrates key innovations: Bimetallic Core-Shell SERS Substrate: A gold-silver (Au@Ag) structure enhances sensitivity, stability, and signal reproducibility, with a silk fibroin-based anti-opal array amplifying electromagnetic fields and ensuring mechanical durability. Integrated Microfluidics: Seamless channels guide effi…	NO	NA	NA	NA	2024	Hu, Mengsu; Zhu, Kai; Wei, Jinxiu; Yang, Kuo; Wu, Lei; Zong, Shenfei; Wang, Zhuyuan	Silk fibroin-based wearable SERS biosensor for simultaneous sweat monitoring of creatinine and uric acid	Biosensors and Bioelectronics
GVRTPDR7	10.1007/s00421-023-05364-4	https://link.springer.com/10.1007/s00421-023-05364-4	YES	skin-attached		NO	monitor sodium concentration in sweat during exercise	electrochemical	Electrochemical	The Wearable Fabric Sensor (WFS) demonstrates strong accuracy in measuring sweat sodium concentration compared to the gold standard Sweat Sodium Analyzer (SSA). The WFS readings (54 mM ± 22 mM) closely matched the SSA (59 mM ± 22 mM), with no significant difference (p = -0.45) and a mean bias of 5.35 mM. Statistical analysis confirmed high agreement, with Lin’s concordance correlation coefficient…		NA	yes	-	-	sweat													Na+					1	1	validation	Human	Human studies	NA	NA	The Wearable Fabric Sensor (WFS) features a novel material design using electrospun nylon-6/MWCNT nanocomposites for sodium sensing. This structure provides high surface area, selective sodium ion binding, and resistance-based sensing, enabling accurate quantification of sweat sodium concentration. Integrated into a flexible fabric platform, the sensor ensures comfort, conformal skin contact, and…	RooSense LLC	USA	YES	NA	2024	Dyshko, Kristina; Nicodemus, Mary Pat; Otterstetter, Ronald; Ghadimi, Hanieh; Daniels, Shelby; Fulmer, Michael S.; Cheney, Zachary; Ellis, Rebecca; Stege, Victoria; Monty, Chelsea N.	Evaluation of a wearable fabric-based sensor for accurate sodium determination in sweat during exercise	European Journal of Applied Physiology
PTQLBWUT	10.1016/j.bios.2024.116136	https://linkinghub.elsevier.com/retrieve/pii/S0956566324001416	YES	patch	skin-attached	NO	non-invasive monitoring of riboflavin levels in sweat.	electrochemical	Electrochemical	Sensitivity: the rGO/PtNPs modified electrode achieved an average sensitivity of 0.0067 μA/nM for riboflavin detection, with a relative standard deviation (RSD) of 6.18%. This high sensitivity is attributed to the synergistic effect of the rGO and PtNPs, which enhance the electroactive surface area and charge transfer efficiency. Detection Limit: the device boasts a low detection limit of 1.2 nM …	Metabolic Syndrome	nutritional health management (focusing on riboflavin status).	yes	-	-	sweat											yes		riboflavin, pH					1	2	Prototype/Validation	Human	in-vitro tests + human studies	NA	NA	Flexible, Battery-Free Design: a flexible printed circuit board (PCB) enables comfortable skin attachment, powered wirelessly via NFC technology for lightweight, unobtrusive wear. Nanomaterial-Enhanced Sensitivity: electrodes with reduced graphene oxide (rGO) and platinum nanoparticles (PtNPs) provide high sensitivity and selectivity for riboflavin detection. Efficient Sweat Sampling: a microflui…	NO	NA	YES	NA	2024	Shi, Zhenghan; Deng, Peixue; Zhou, Li-ang; Jin, Meng; Fang, Feiyue; Chen, Tao; Liu, Guang; Wen, Hao; An, Zijian; Liang, Hao; Lu, Yanli; Liu, Jun; Liu, Qingjun	Wireless and battery-free wearable biosensing of riboflavin in sweat for precision nutrition	Biosensors and Bioelectronics
5X9VZ3MQ	10.1016/j.talanta.2020.121815	https://www.ncbi.nlm.nih.gov/pubmed/33379040	YES	patch		NO	alcohol monitoring through sweat analysis	electrochemical	Electrochemical.	The current response increased linearly (R 2 = 0.993) over alcohol concentration range making the presented methodology suitable for the detection of small ingestions of alcohol. The limit of detection (LOD) was 0.045 mM/L which is 10 times lower than the amount of alcohol after the ingestion of 1 drink.		NA	yes	-	-	sweat													Ethanol					1	1	proof-of-concept		In-vitro tests	NA	NA	electrochemical sensor within a continuous monitoring application. Utilising disposable screen-printed electrodes modified with a PANI containing AOX film, a low-cost alternative to the complex instrumentation currently utilised for analysis of such samples is offered.	NO	NA	NA	NA	2021	Biscay, J.; Findlay, E.; Dennany, L.	Electrochemical monitoring of alcohol in sweat	Talanta
8M49IZSY	10.1038/s41467-021-22109-z	https://www.ncbi.nlm.nih.gov/pubmed/33758197	YES	patch		NO	continuous sweat monitoring at rest	electrochemical	Electrochemical	We observed that levodopa concentration in sweat generally increases with increasing doses. When other foods with minimal levodopa is consumed, no significant signal is observed.This indicates that monitoring sweat levodopa may be a promising way to keep track of blood levodopa to assist medication management of Parkinson’s disease patients. However, the exact relations between sweat levodopa con…		NA	yes	-	-	sweat											yes		pH, Cl-, levodopa					1	3	Prototype/Validation	Human	Human studies	NA	NA	the wearable sweat patch incorporates several cutting-edge technologies, including microfluidics for controlled sweat management, hydrophilic fillers for rapid sample uptake, integrated electrochemical sensors for biomarker detection, and a flexible substrate for comfortable wearability.	NO	NA	NA	NA	2021	Nyein, H. Y. Y.; Bariya, M.; Tran, B.; Ahn, C. H.; Brown, B. J.; Ji, W.; Davis, N.; Javey, A.	A wearable patch for continuous analysis of thermoregulatory sweat at rest	Nat Commun
LTY9X8HQ	10.1016/j.bios.2024.116358	https://linkinghub.elsevier.com/retrieve/pii/S0956566324003634	YES	patch		NO	continuous, non-invasive glucose monitoring using human sweat	electrochemical	Electrochemical	The GOx/PB/MWCNT-Fe3O4 printed sensor exhibits a sensitivity of 4.495 μAμM−1cm−2 in a phosphate-buffered saline (PBS) solution. Further testing reveals that the sensitivity slightly improves in an artificial sweat solution, reaching 4.59 μAμM−1cm−2. The sensor also demonstrates a remarkable limit of detection (LOD) of 0.38 μM in PBS and 0.31 μM in artificial sweat. These sensitivity and LOD value…	Diabetes	diabetes management	yes	-	-	sweat					yes								glucose					1	1	Prototype/Validation	Human	human studies	NA	NA	Nanocomposite Ink: a custom ink with MWCNTs, Fe₃O₄ nanoparticles, and PEDOT:PSS enhances conductivity, catalytic activity, and biocompatibility. All-Printed Flexible Design: screen-printing on a Mylar® substrate enables low-cost, scalable production, with excellent wearability and comfort. Prussian Blue Nanoparticles: serve as efficient redox mediators, boosting sensitivity and stability during g…	NO	NA	NA	NA	2024	Shamili, Chandradas; Pillai, Adarsh Sivan; Saisree, S; Chandran, Achu; Varma, Manoj Raama; Kuzhichalil Peethambharan, Surendran	All-printed wearable biosensor based on MWCNT-iron oxide nanocomposite ink for physiological level detection of glucose in human sweat	Biosensors and Bioelectronics
PQAUHNH2	10.1038/s41551-022-00916-z	https://www.ncbi.nlm.nih.gov/pubmed/35970928	YES	patch		NO	monitoring of multiple metabolites and nutrients in sweat.	electrochemical	Electrochemical	The sensitivity for the in vitro indirect detection of target molecules using the LEG-AQCA-MIP sensors was reported as 1×10−5AV−1 for negative differential pulse voltammetry (DPV) analysis.		NA	yes	-	-	sweat					yes			yes		yes	yes	yes	All nine essential AAs (Leu, Ile, Val, Trp, Phe, His, Lys, Met, Thr) + vitamin B6, C, D3, E, glucose, uric acid, creatine, creatinine, and cholesterol.					1	18	Prototype/Validation	Human	Human studies	NA	NA	A wearable electrochemical biosensor for the continuous analysis, in sweat during physical exercise and at rest, of trace levels of multiple metabolites and nutrients, including all essential amino acids and vitamins. The biosensor consists of graphene electrodes that can be repeatedly regenerated in situ, functionalized with metabolite-specific antibody-like molecularly imprinted polymers and re…	NO	NA	YES	NA	2022	Wang, M.; Yang, Y.; Min, J.; Song, Y.; Tu, J.; Mukasa, D.; Ye, C.; Xu, C.; Heflin, N.; McCune, J. S.; Hsiai, T. K.; Li, Z.; Gao, W.	A wearable electrochemical biosensor for the monitoring of metabolites and nutrients	Nat Biomed Eng
BHGBZAVU	10.1002/smtd.202200653	https://onlinelibrary.wiley.com/doi/10.1002/smtd.202200653	YES	skin-attached		NO	continuously and wirelessly monitor biomarkers in sweat at the molecular level	electrochemical	Electrochemical	The Na+ sensor exhibits a near-Nernstian sensitivity of 67.43 mV per decade of ion concentration. This means that for every tenfold increase in the concentration of Na+ ions in the sweat, the sensor's output voltage increases by approximately 67.43 mV. The K+ sensor demonstrates a near-Nernstian sensitivity of 30.42 mV per decade of ion concentration. Similarly, for a tenfold increase in K+ ion c…		NA	yes	-	-	sweat													Na+, K+					1	2	Validation	Human	in-vitro tests + laboratory testing + human studies	NA	NA	The Sweat Wearable Sensor Analysis System (SWSAS) integrates Hybrid Nanogenerator Modules (HNGMs), which combine Triboelectric Nanogenerators (TENGs) and Electromagnetic Generators (EMGs) to harvest mechanical energy from motion. This hybrid system efficiently powers the wearable device. A flexible sweat sensor patch, made from laser-induced graphene (LIG), enables comfortable ion detection (e.g.…	NO	NA	YES	NA	2022	Gai, Yansong; Wang, Engui; Liu, Minghao; Xie, Lirong; Bai, Yuan; Yang, Yuan; Xue, Jiangtao; Qu, Xuecheng; Xi, Yuan; Li, Linlin; Luo, Dan; Li, Zhou	A Self‐Powered Wearable Sensor for Continuous Wireless Sweat Monitoring	Small Methods
LIKNRV8Y	10.3390/bios12100854	https://www.ncbi.nlm.nih.gov/pubmed/36290991	YES	patch	textile	NO	cortisol detection in sweat	electrochemical	Electrochemical	The cortisol sensor rapidly (<2 min) responded to 9.8−49.5 ng/mL of cortisol, with an average relative standard deviation (%RSD) of 6.4% across the dynamic range, indicating excellent precision. The cortisol sensor yielded an excellent limit of detection (LOD) of 8.00 ng/mL, which is within the typical physiological levels in human sweat. A single cortisol sensor patch could be reused 15 times ov…		NA	yes	-	-	sweat							yes						cortisol					1	1	Prototype	Human	Human studies	NA	NA	The wearable cortisol sensor was fabricated via layer-by-layer assembly (LbL) on a flexible cotton textile substrate coated with a conductive nanoporous carbon nanotube/cellulose nanocrystal (CNT/CNC) composite suspension, conductive polyaniline (PANI), and a selective cortisol-imprinted poly(glycidylmethacrylate-co-ethylene glycol dimethacrylate) (poly(GMA-co-EGDMA)) decorated with gold nanopart…	NO	NA	NA	NA	2022	Mugo, S. M.; Lu, W.; Robertson, S.	A Wearable, Textile-Based Polyacrylate Imprinted Electrochemical Sensor for Cortisol Detection in Sweat	Biosensors (Basel)
GNHCYBKN	10.1016/j.bios.2022.114994	https://linkinghub.elsevier.com/retrieve/pii/S095656632201034X	YES	skin-attached		NO	monitoring urea levels in sweat	electrochemical	Electrochemical	The biosensor's sensitivity varies with the pH of the sweat sample. At lower pH values (more acidic conditions), the sensitivity is higher but with a narrower linear range. The sources provide specific sensitivity values (slopes of the calibration curves) for different pH levels: pH 4.9: -0.17 V/decade of urea concentration. pH 5.7: -0.062 V/decade of urea concentration; pH 7.0: -0.053 V/decade o…		NA	yes	-	-	sweat									yes		yes		urea, pH					1	2	Validation	Human	in-vitro + human studies	NA	NA	Integrated pH Sensor for Accurate Urea Monitoring: Incorporates real-time pH correction, enabling precise urea quantification despite individual sweat pH variations, while simultaneously monitoring pH as an additional biomarker for hydration status. Flexible Screen-Printed Electrodes (SPCEs): Fabricated on flexible substrates, ensuring skin conformability, mechanical durability, and scalability f…	NO	NA	NA	NA	2023	Ibáñez-Redín, Gisela; Rosso Cagnani, Giovana; O. Gomes, Nathalia; Raymundo-Pereira, Paulo A.; S. Machado, Sergio A.; Gutierrez, Marco Antonio; Krieger, Jose Eduardo; Oliveira, Osvaldo N.	Wearable potentiometric biosensor for analysis of urea in sweat	Biosensors and Bioelectronics
9ATFLSW3	10.1016/j.bios.2024.116560	https://www.ncbi.nlm.nih.gov/pubmed/39018979	YES	patch		NO	real-time, continuous monitoring of specific biomarkers in sweat.	electrochemical	Electrochemical	ISFET sensor devices can be readily applied for measuring ion concentrations in sweat. pH, Na +, and K + ISFETs were characterized in standard and artificial sweat solutions, demonstrating an overall good performance in the range of analyte concentrations present in sweat.		NA	yes	-	-	sweat											yes		pH, Na+, K+					1	3	Validation	Human	Human studies	NA	NA	The platform comprises Ion-Sensitive Field-Effect Transistors (ISFETs) manufactured on silicon, a tailor-made solid-state reference electrode, and a temperature sensor integrated into a patch-like polymeric substrate, together with the component that easily collects and drives samples under continuous capillary flow to the sensor areas.	NO	NA	NA	NA	2024	Rovira, M.; Lafaye, C.; Demuru, S.; Kunnel, B. P.; Aymerich, J.; Cuenca, J.; Serra-Graells, F.; Margarit-Taule, J. M.; Haque, R.; Saubade, M.; Fernandez-Sanchez, C.; Jimenez-Jorquera, C.	Assessing the performance of a robust multiparametric wearable patch integrating silicon-based sensors for real-time continuous monitoring of sweat biomarkers	Biosens Bioelectron
W72UAR3C	10.1002/adhm.201901321	https://onlinelibrary.wiley.com/doi/10.1002/adhm.201901321	YES	skin-attached		NO	multiplexed sensing of ammonium (NH4+) and calcium (Ca2+) ions from human perspiration	electrochemical	Electrochemical	Ion concentrations detected: 0.01 × 10⁻³ to 100 × 10⁻³ M for both NH4⁺ and Ca²⁺. Covers typical physiological levels in human sweat. Achieves steady-state current in <1 second, enabling real-time monitoring. Relative Standard Deviation (RSD): 5% across three measurements per subject. Stability test over 100 cycles: Signal loss of only 1.1–2.9% in artificial sweat solution. Minimal impact from int…		NA	yes	-	-	sweat													NH4+, Ca2+					1	2	Validation	Human	In-vitro, Human-studies	NA	NA	Substrate: Styrene-Ethylene-Butylene-Styrene (SEBS) elastomer, highly stretchable and durable. Sweat Acquisition Layer: Laser-patterned microcapillary channels on polyimide tape for efficient sample collection. Organic Electrochemical Transistors (OECTs): Transconductance: ≈2 mS; Operating Voltage: <0.5 V. Ion-Selective Membranes (ISMs): Selective for NH4⁺ and Ca²⁺ via ionophore shuttles. Two PED…	NO	NA	NA	NA	2019	Keene, Scott T.; Fogarty, Daragh; Cooke, Ross; Casadevall, Carlos D.; Salleo, Alberto; Parlak, Onur	Wearable Organic Electrochemical Transistor Patch for Multiplexed Sensing of Calcium and Ammonium Ions from Human Perspiration	Advanced Healthcare Materials
W57E676X	10.1016/j.bios.2022.114450	https://linkinghub.elsevier.com/retrieve/pii/S0956566322004900	YES	skin-attached		NO	real-time, non-invasive glucose monitoring in sweat.	electrochemical	Electrochemical	Limit of Detection (LOD): The LOD is the lowest concentration of an analyte that can be reliably detected by the sensor. The glucose tag has an LOD of 24 μM. Limit of Quantification (LOQ): The LOQ is the lowest concentration of an analyte that can be quantitatively measured with acceptable accuracy and precision. The glucose tag boasts an LOQ of 74 μM. Sensitivity: The sensitivity of the sensor r…	Diabetes	diabetes management	yes	-	-	sweat					yes								glucose					1	1	Validation	Human	in-vitro tests + Ex-situ (Off-Body) Testing + Human Studies (preliminary human trials) + laboratory Testing	NA	NA	Femtosecond Laser Ablation: Enables precise, damage-free fabrication of a flexible NFC antenna on a PCB, eliminating cleanroom needs while achieving high performance in a miniaturized design. Battery-Free NFC Technology: Utilizes NFC for wireless powering and data transfer, harvesting energy from smartphones, which reduces size and weight. Flexible, Layered Structure: Ensures comfort and reliable…	NO	NA	YES	NA	2022	Mirzajani, Hadi; Abbasiasl, Taher; Mirlou, Fariborz; Istif, Emin; Bathaei, Mohammad Javad; Dağ, Çağdaş; Deyneli, Oğuzhan; Yazıcı, Dilek; Beker, Levent	An ultra-compact and wireless tag for battery-free sweat glucose monitoring	Biosensors and Bioelectronics
IGNEK2NR	10.1016/j.bios.2022.114565	https://linkinghub.elsevier.com/retrieve/pii/S0956566322006054	YES	patch		NO	monitoring lactate levels in sweat	electrochemical	Electrochemical + optical	A LOD of 3.70 mM was calculated based on the RGB analysis of images captured during in vitro testing. This LOD was determined using a linear regression of data points collected after 120 seconds of exposure to varying lactate concentrations. The authors note that this LOD is sufficient for discrimination within the physiological sweat lactate range of 4-80 mM. The researchers employed RGB analysi…		NA	yes	-	-	sweat						yes							lactate					1	1	Prototype/Validation	Human	in-vitro tests + laboratory testing + human studies	NA	NA	The ESPS device integrates advanced features for wearable biosensing: Flexible Electronics: Fabricated on a flexible PET substrate using cost-effective screen printing, it employs customized conductive inks for transparent and efficient electrochromic display electrodes. Self-Powered Operation: A dual biofuel cell (BFC) system generates energy through lactate oxidation and oxygen reduction, elimi…	NO	NA	NA	NA	2022	Hartel, Martin C.; Lee, Dongwook; Weiss, Paul S.; Wang, Joseph; Kim, Jayoung	Resettable sweat-powered wearable electrochromic biosensor	Biosensors and Bioelectronics
9SYQF7VI	10.1016/j.bios.2022.113970	https://linkinghub.elsevier.com/retrieve/pii/S0956566322000094	YES	skin-attached		NO	real-time, continuous monitoring of lactate levels in sweat.	electrochemical	Electrochemical	Pearson Correlation Coefficient: 0.97 (comparison with reference analytical method, 20+ sweat samples). Deviation between wearable readings and reference: within 10%. Reference method: Integrated lactate concentration over 4–6 minutes. Wearable device: Real-time, continuous monitoring. Sensitivity (S): Enhanced by Prussian Blue nanozymes due to increased surface area and reduced diffusion limitat…		NA	yes	-	-	sweat						yes							lactate					1	1	Validation	Human	In-vitro, Human-studies	NA	NA	Flow-Independent Biosensor: Co-immobilized Lactate Oxidase (LOD) and Prussian Blue Nanozymes ensure accurate lactate detection independent of sweat rate by creating a diffusion-controlled environment with a PFSI membrane. High-Sensitivity Nanozymes: Prussian Blue nanozymes offer enhanced sensitivity, reduced diffusion limitations, and extended operational life due to their large surface area and …	NO	NA	NA	NA	2022	Komkova, Maria A.; Eliseev, Artem A.; Poyarkov, Andrei A.; Daboss, Elena V.; Evdokimov, Pavel V.; Eliseev, Andrei A.; Karyakin, Arkady A.	Simultaneous monitoring of sweat lactate content and sweat secretion rate by wearable remote biosensors	Biosensors and Bioelectronics
MV4SJ9RX	10.1016/j.bios.2020.112133	https://linkinghub.elsevier.com/retrieve/pii/S0956566320301317	YES	skin-attached		NO	non-invasive cortisol detection in sweat	electrochemical	Electrochemical	Sensor-Level Sensitivity: LOD of 1 pg/mL, sensitivity of 0.25 Ω/ng·mL⁻¹ (cortisol in artificial sweat). Integrated LOP Sensitivity: Sensitivity of 0.273 Ω/ng·mL⁻¹ after integrating with the microfluidic device. 3D Electrode Enhancement: Nanostructured gold electrodes improve sensitivity via increased antibody binding sites. Comparison with ELISA: Relative difference of 14.7% (±9.38%) based on swe…		NA	yes	-	-	sweat							yes						cortisol					1	1	Validation	Human	in-vitro tests + laboratory testing + human studies	NA	NA	Enhanced sensitivity via 3D gold electrodes with increased antibody binding sites. Mechanical stability on a flexible mogul-patterned substrate ensures durability during skin movement. Compact design for discreet wearability. Hydrophilic PVP-treated channels ensure efficient sweat flow. Zig-zag capillaries and advanced valves enable autonomous sweat metering, precise incubation, and one-touch rea…	NO	NA	NA	NA	2020	Lee, Han-Byeol; Meeseepong, Montri; Trung, Tran Quang; Kim, Bo-Yeong; Lee, Nae-Eung	A wearable lab-on-a-patch platform with stretchable nanostructured biosensor for non-invasive immunodetection of biomarker in sweat	Biosensors and Bioelectronics
GM54SNAE	10.1016/j.bios.2024.116280	https://linkinghub.elsevier.com/retrieve/pii/S0956566324002859	YES	patch		minimally	continuous glucose monitoring in interstitial fluid (ISF).	electrochemical	Electrochemical	In-vitro Sensitivity: Achieves 77.721 nA mM⁻¹ mm⁻² over a glucose concentration range of 0–15 mM, with a linear correlation coefficient (R²) of 0.9987. Limit of Detection (LOD): Detects glucose concentrations as low as 36.437 μM (signal-to-noise ratio of 3). Differential Sensing Accuracy: Employs a differential sensor to reduce interference, improving the Pearson correlation coefficient from 0.56…	Diabetes	diabetes management	-	-	yes	interstitial fluid					yes								glucose					1	1	Validation	Human	in-vitro, ex-vivo, in-silico (FEM), animal models, and human studies,	NA	NA	Differential Microneedle Array: Combines acupuncture needles with PCB boards to integrate multiple sensing electrodes on a single microneedle system. Differential Sensing Electrodes: Uses two electrochemical three-electrode systems to eliminate interference, enhancing glucose detection accuracy. Wireless Data Transmission: Sends glucose data via Bluetooth to a smartphone app for real-time monitor…	NO	NA	YES	NA	2024	Yang, Yong; Sheng, Can; Dong, Fang; Liu, Sheng	An integrated wearable differential microneedle array for continuous glucose monitoring in interstitial fluids	Biosensors and Bioelectronics
G2KZXD8L	10.1016/j.bios.2020.112828	https://linkinghub.elsevier.com/retrieve/pii/S0956566320308149	YES	patch		NO	simultaneously measure glucose and lactate levels in sweat	electrochemical	Electrochemical	Glucose Detection: Sensitivity: 2.4 nA μM⁻¹ for concentrations 0.08–1.25 mM. 1.0 nA μM⁻¹ for higher concentrations. Limit of Detection (LOD): 17.05 μM. Lactate Detection: Sensitivity: 0.49 μA mM⁻¹ within the physiological range (0.3–20.3 mM). LOD: 3.73 μM. Additional Performance Metrics: Reproducibility: Consistent responses across different sensor batches. Stability: Maintains electrochemical pe…		NA	yes	-	-	sweat					yes	yes							glucose, lactate					1	2	Proof-of-concept	Human	in-vitro tests + laboratory testing + human studies	NA	NA	Flexible All-Paper Substrate: Lightweight, biocompatible, and hydrophobically patterned for guided sweat flow and improved wearability. Three-Dimensional Folded Structure: Enhances sweat absorption, vertical diffusion, and electrode accessibility while avoiding direct skin contact. Advanced Sensing Materials: Ti₃C₂Tx MXene electrodes modified with methylene blue boost conductivity, adsorption, an…	NO	NA	YES	NA	2021	Li, Meng; Wang, Lichao; Liu, Rui; Li, Jianmin; Zhang, Qinghong; Shi, Guoying; Li, Yaogang; Hou, Chengyi; Wang, Hongzhi	A highly integrated sensing paper for wearable electrochemical sweat analysis	Biosensors and Bioelectronics
MCDSNJZK	10.1002/smtd.202000926	https://onlinelibrary.wiley.com/doi/10.1002/smtd.202000926	YES	skin-attached		NO	monitoring glucose and lactate levels in sweat	electrochemical	Electrochemical	Glucose Sensor: Detection limit: 2 µM. Sensitivity: 31.02 µA mM⁻¹ cm⁻² within a linear range of 2 µM to 1 mM. Sensitivity with silk fibroin nanofibrils (SFNFs) is 1.58x higher than silk fibroin (SF) and 1.95x higher than chitosan. Lactate Sensor: Linear range: 0.4 to 6 mM. Sensitivity: 6.68 µA cm⁻² [log₁₀ (mM)]⁻¹. Stability and Selectivity: Operational stability: 25 hours (glucose) and 23.6 hours…		NA	yes	-	-	sweat					yes	yes							glucose, lactate					1	1	prototype	Human	human studies	NA	NA	Silk fibroin nanofibrils (SFNFs) to create a porous membrane that enhances enzyme stability and lifespan. An ultra-thin PtNPs/graphene (Pt-G) film to facilitate efficient electron transport, boosting sensitivity. A flexible and biocompatible polyurethane/silk fibroin (PSF) substrate ensuring comfort for the wearer. Integration into a wearable platform with wireless data transmission capabilities …	NO	NA	NA	NA	2021	Liu, Xiaotian; Zhang, Wenli; Lin, Zaifu; Meng, Zhaohui; Shi, Chenyang; Xu, Zhijun; Yang, Likun; Liu, Xiang Yang	Coupling of Silk Fibroin Nanofibrils Enzymatic Membrane with Ultra‐Thin PtNPs/Graphene Film to Acquire Long and Stable On‐Skin Sweat Glucose and Lactate Sensing	Small Methods
X83KNB2P	10.1016/j.bios.2024.116299	https://linkinghub.elsevier.com/retrieve/pii/S095656632400304X	YES	patch		NO	monitoring of sweat rate and electrolytes detection	electrochemical	Electrochemical	Linearity with Syringe Pump: The Art-Sweat patch demonstrated excellent linearity when tested with a syringe pump delivering a 50 mM NaCl solution at known flow rates. Dynamic Flow Rate Detection: The patch reliably detected flow rates ranging from 1.0 to 4.0 μL/min with a rapid response time. Comparison with Absorbent Pads: The patch showed consistent trends with sweat rates determined using abs…		NA	yes	-	-	sweat													electrolytes* (not specified)					1	NA*	Validation	Human	in-vitro + human studies	NA	NA	Resettable Microfluidic Channel with Droplet Separation: Combines horizontal microchannels with sweat absorption for continuous, long-term monitoring (capacity up to 333 μL), surpassing standard devices. Side-Wall Vent with Stop Valve: Ensures stable droplet formation, air pressure equilibrium, and prevents leakage for accurate data in motion-intensive scenarios. Dual-Mode Signal Decoupling: Simu…	NO	NA	YES	NA	2024	Liu, Mengyuan; Liu, Siyuan; Zhang, Tong; Zhou, Dengfeng; Li, Lianhui; Gao, Qiang; Liu, Yujie; Ge, Changlei; Wang, Yongfeng; Wang, Mingxu; Wen, Feng; Xiong, Zuoping; Zhou, Zhen; Wang, Shuqi; Zhang, Ting	Adaptively resettable microfluidic patch for sweat rate and electrolytes detection	Biosensors and Bioelectronics
3HA757EG	10.1016/j.aca.2023.342154	https://linkinghub.elsevier.com/retrieve/pii/S0003267023013752	YES	skin-attached		NO	detection of uric acid in sweat	electrochemical	Electrochemical	Sensitivity: The sensor demonstrates a sensitivity of 0.87 μA μM− 1 cm− 21. This value indicates a significant change in the measured current for each unit change in uric acid concentration. Limit of Detection (LOD): The LOD, determined based on a signal-to-noise ratio of 3, is 0.87 μM2. This value represents the lowest concentration of uric acid that the sensor can reliably distinguish from back…		NA	yes	-	-	sweat								yes					uric acid (UA)					1	1	Prototype/Validation		in-vitro + laboratory testing	NA	NA	Flexible and Stretchable Substrate: Uses a 3D graphene foam (GF) embedded in polydimethylsiloxane (PDMS), allowing for high stretchability (strain up to 110%), flexibility, and durability. High Sensitivity: Leveraging graphene's excellent conductivity and surface area for precise uric acid detection. Pt/Pd Nanoparticle Enhancement: Modifies the substrate with nanoparticles to boost electrocatalyt…	NO	NA	NA	NA	2024	Lv, Mingrui; Qiao, Xiujuan; Li, Yanxin; Zeng, Xianghua; Luo, Xiliang	A stretchable wearable sensor with dual working electrodes for reliable detection of uric acid in sweat	Analytica Chimica Acta
5MB5SR5A	10.1007/s10544-016-0142-3	http://link.springer.com/10.1007/s10544-016-0142-3	YES	skin-attached		NO	biomarkers detection	electrochemical	Electrochemical	Limit of Detection (LOD): The sensor detects BNP concentrations as low as 100 pg/mL, enabling early heart failure detection. Specificity: A 112-fold higher response to BNP compared to non-specific targets (e.g., BSA, IgG), ensuring accuracy. Sensitivity and Linearity: Exhibits a linear response to BNP concentrations from 100 pg/mL to 1 ng/mL, supporting quantification of BNP levels. Surface Morph…		NA	-	-	-	PBS													BNP					1	1	Proof-of-concept		in-vitro + laboratory testing	NA	NA	Novel Material: Utilizes 2-D polyaniline nanostructures with high surface-area-to-volume (SA/V) ratios, enhancing sensitivity through increased antibody binding sites. Simplified Fabrication: Combines CMOS-compatible methods and chemical synthesis for cost-effective, uniform production on flexible substrates. Flexible Substrate: Built on polyimide (PI) for wearable applications, offering stable p…	NO	NA	NA	NA	2016	Liu, Pei; Zhu, Yisi; Lee, Seung Hee; Yun, Minhee	Two-dimensional polyaniline nanostructure to the development of microfluidic integrated flexible biosensors for biomarker detection	Biomedical Microdevices
HBCN9CMW	10.1016/j.talanta.2020.121502	https://linkinghub.elsevier.com/retrieve/pii/S0039914020307931	YES	skin-attached		NO	real-time pH monitoring in sweat	electrochemical	Electrochemical	Sensitivity: The sensor exhibits a super-Nernstian response with a slope of -0.079 ± 0.002 V per unit of pH (RSD% = 2.5%). Comparison with Portable Potentiostat: Measurements using the integrated device were compared to those obtained with a laboratory-grade portable potentiostat. The results showed a strong correlation (R2= 0.997) between the two methods, confirming the accuracy of the wearable …		NA	yes	-	-	sweat											yes		pH					1	1	Prototype	Human	laboratory testing + human studies	NA	NA	The flexible pH sensor integrates several innovative features:Kapton Substrate: Combines flexibility and durability for a comfortable, long-term wearable design with integrated electrodes, circuitry, and RFID antenna. Screen-Printed Sensor: Cost-effective and scalable fabrication with precise deposition of conductive inks and a sensitive iridium oxide layer. High-Sensitivity Iridium Oxide: Ensure…	NO	NA	NA	NA	2021	Mazzaracchio, Vincenzo; Fiore, Luca; Nappi, Simone; Marrocco, Gaetano; Arduini, Fabiana	Medium-distance affordable, flexible and wireless epidermal sensor for pH monitoring in sweat	Talanta
Q3RX89I4	10.1016/j.bios.2023.115198	https://linkinghub.elsevier.com/retrieve/pii/S0956566323001409	YES	skin-attached		NO	monitor levels of H2O2 and glucose	electrochemical	Electrochemical	For H2O2, the detection sensitivity is 11.74 nA mM− 1 mm− 2 in the range of 0.002–2 mM and 0.68 nA mM− 1 mm− 2 in the range of 2–100 mM. The limit of detection (LOD) for H2O2 is 1.88 μM.1 This LOD is reportedly superior to some previously reported H2O2 electrochemical sensors. For glucose, the sensitivity is reported as 0.19 nA μM− 1 with a linear range of 40–200 x 10−6 M. The LOD for glucose is …		NA	yes	-	-	sweat					yes								glucose, H2O2					1	2	Prototype	Human	laboratory testing + in-vitro tests + human studies (limited, only 1 volunteer)	NA	NA	Biomimetic Enzyme Activity: Gold nanoparticles (AuNPs) within N-doped porous carbonized silk fibroin (CSF) mimic natural enzyme activity, enhancing sensitivity and stability for H₂O₂ and glucose detection. Flexible Silk Fibroin Substrate: A modified silk fibroin substrate ensures biocompatibility, flexibility, and a stable skin interface. Polyurethane Reinforcement: PU integration boosts flexibil…	NO	NA	NA	NA	2023	Meng, Guoqing; Long, Fen; Zeng, Zhicheng; Kong, Lingqing; Zhao, Bicheng; Yan, Jiaqi; Yang, Likun; Yang, Yun; Liu, Xiang-Yang; Yan, Zhengquan; Lin, Naibo	Silk fibroin based wearable electrochemical sensors with biomimetic enzyme-like activity constructed for durable and on-site health monitoring	Biosensors and Bioelectronics
2MG8QZR7	10.1016/j.bios.2021.113765	https://linkinghub.elsevier.com/retrieve/pii/S0956566321008022	YES	skin-attached		NO	non-invasive, real-time monitoring of sweat metabolites and electrolytes	electrochemical	Electrochemical	Sodium (Na+) Sensor: The Na+ sensor exhibits a linear relationship between the open-circuit potential and the logarithm of the Na+ concentration. The standard curve equation is: Y = 0.0196 × log2(X) + 0.1695, with an R² value of 0.9984. This indicates a high degree of correlation and sensitivity to changes in Na+ concentration. Potassium (K+) Sensor: The K+ sensor also demonstrates a linear respo…		NA	yes	-	-	sweat					yes				yes		yes		Glucose, Na+, K+, pH, Urea					1	5	Prototype/Validation	Human	Laboratory testing + human studies	NA	NA	The Liquid Metal-Polymer Conductor (LMPC) patch introduces groundbreaking innovations for flexible, battery-free health monitoring: LMPC Material: Embeds liquid metal particles in a polymer matrix, enabling exceptional flexibility, stretchability, and biocompatibility while ensuring stable electrical performance during movement. LMPC-Based Antenna: Features a wireless, highly conductive antenna p…	NO	NA	YES	NA	2022	Mou, Lei; Xia, Yong; Jiang, Xingyu	Liquid metal-polymer conductor-based wireless, battery-free epidermal patch	Biosensors and Bioelectronics
HDFXAHHP	10.1093/ibd/izaa191	https://www.ncbi.nlm.nih.gov/pubmed/32720974	YES	wrist-worn	smartwatch-like	NO	monitoring specific biomarkers in eccrine sweat	Impedance spectroscopy	Impedance Spectroscopy	The device achieved a Pearson correlation of r = 0.99 for IL-1β and r = 0.95 for CRP compared to ELISA results. Bland-Altman Analysis showed a mean bias of -0.25 pg/mL for IL-1β and -3.9 pg/mL for CRP.	Inflammation	Inflammatory bowel disease (IBD).	yes	-	-	eccrine sweat													Interleukin-1β (IL-1β), C-reactive protein (CRP)					1	2	Validation	Human	Human studies	NA	NA	A novel sensing platform that facilitates simultaneous multiplexed detection of biomarkers through the use of monoclonal antibodies and impedimetric detection modality.	EnLiSense LLC	USA	NA	NA	2020	Jagannath, B.; Lin, K. C.; Pali, M.; Sankhala, D.; Muthukumar, S.; Prasad, S.	A Sweat-based Wearable Enabling Technology for Real-time Monitoring of IL-1beta and CRP as Potential Markers for Inflammatory Bowel Disease	Inflamm Bowel Dis
72CRFVBG	10.1016/j.talanta.2022.123695	https://www.ncbi.nlm.nih.gov/pubmed/35728453	YES	microneedle	hollow; array	Minimally	monitoring of glucose levels in interstitial fluid (ISF).	electrochemical	Electrochemical	The MN biosensor exhibited excellent stability (i.e., RSD = 1.9%) using interval monitoring for 7.5 h in a high concentration of glucose (i.e., 10 mM) and employing continuous monitoring mode (RSD = 6.8%).	Diabetes	Diabetes management	-	-	yes	interstitial fluid					yes								glucose					1	1	Prototype/Validation		In-vitro + ex-vivo	NA	NA	Highly stable electrochemical biosensor based on a redox mediator bilayer consisting of Prussian blue and iron-nickel hexacyanoferrate to increase the long-term stability of the readout coupled with a hollow MN array as a sampling unit for ISF uptake.	NO	NA	NA	NA	2022	Parrilla, M.; Detamornrat, U.; Dominguez-Robles, J.; Donnelly, R. F.; De Wael, K.	Wearable hollow microneedle sensing patches for the transdermal electrochemical monitoring of glucose	Talanta
9H9B8TQX	10.1002/smll.202306769	https://onlinelibrary.wiley.com/doi/10.1002/smll.202306769	YES	skin-attached		NO	real-time, continuous monitoring of multiple biomarkers in sweat.	electrochemical	Electrochemical	Potassium (K+): The potassium ion-selective sensor showed a linearity of 0.989 within its detection range, with a sensitivity of 48 mV per decade of concentration. Sodium (Na+): The sodium ion-selective sensor exhibited a linearity of 0.999 and a sensitivity of 87.9 mV per decade of concentration. Glucose: The glucose amperometric sensor had a linearity of 0.956 within its detection range and a s…		NA	yes	-	-	sweat					yes	yes							K+, Na+, Lactate, Glucose					1	4	Prototype/Validation	Human	laboratory testing + human studies.	NA	NA	Tree-Bionic Microfluidic Chip: Biomimetic design mimics tree transpiration, with root-like collection (covering ~200 sweat glands), trunk-like flow stabilization, and leaf-like discharge to enhance efficiency and prevent blockage. Ultra-Thin Elastic Sensor: A 20 μm MEMS-fabricated sensor integrates potentiometric and amperometric detection for multiple biomarkers (K⁺, Na⁺, glucose, lactate) with …	NO	NA	YES	NA	2024	Niu, Jiaqi; Lin, Shujing; Chen, Di; Wang, Zhitao; Cao, Cheng; Gao, Ang; Cui, Shengsheng; Liu, Yanlei; Hong, Yuping; Zhi, Xiao; Cui, Daxiang	A Fully Elastic Wearable Electrochemical Sweat Detection System of Tree‐Bionic Microfluidic Structure for Real‐Time Monitoring	Small
H7K9JYDI	10.1016/j.ijbiomac.2023.124757	https://linkinghub.elsevier.com/retrieve/pii/S0141813023016513	YES	skin-attached		NO	non-invasive detection of sweat urea	electrochemical	Electrochemical + Laser Desorption/Ionization Mass Spectrometry (LDI-MS)	The carbonized AuNPs-silk wearable skin patch exhibits promising accuracy and sensitivity for sweat urea detection. The device boasts a linear detection range of 0–100 mM for urea, covering the clinically relevant cut-off value of 60 mM for chronic kidney disease (CKD). The device employs two detection methods: Electrochemical sensor: This method demonstrates a limit of detection (LOD) of 20 mM. …	Metabolic Syndrome	chronic kidney disease (CKD) management	yes	-	-	sweat									yes				urea					1	1	proof-of-concept		in-vitro test + laboratory testing	NA	NA	Self-Reduction of AuNPs: Tyrosine in silk facilitates the self-reduction of gold nanoparticles, eliminating external reducing agents and lowering production costs. Carbonization for Conductivity: High-temperature carbonization transforms silk into a highly conductive carbon structure, enabling advanced electrochemical sensing. Dual-Detection System: Combines electrochemical sensing with LDI-MS fo…	NO	NA	NA	NA	2023	Promphet, Nadtinan; Phamonpon, Wisarttra; Karintrithip, Wimala; Rattanawaleedirojn, Pranee; Saengkiettiyut, Kanokwan; Boonyongmaneerat, Yuttanant; Rodthongkum, Nadnudda	Carbonization of self-reduced AuNPs on silk as wearable skin patches for non-invasive sweat urea detection	International Journal of Biological Macromolecules
F6ADUP3R	10.1109/TBME.2014.2369991	http://ieeexplore.ieee.org/document/6953152/	YES	skin-attached		NO	monitor electrolyte levels in sweat	electrochemical	Electrochemical (potentiometric)	Sensitivity: the sensor demonstrated a sensitivity of 0.3 mV/mM when integrated into the patch. This means that for every 1 mM increase in sodium concentration, the sensor output voltage increased by 0.3 mV. While slightly lower than the sensitivity of a commercial sensor (0.5 mV/mM), stand-alone sensors exhibited a near-Nernstian behavior of approximately 57 mV/decade of Na+ concentration, sugge…		NA	yes	-	-	sweat													Na+					1	1	prototype		in-vitro tests + laboratory testing	NA	NA	Flexible Printed Circuit Board (FPCB): a Dupont Pyralux-based substrate ensures body-conforming flexibility and comfort, reducing sweat pooling. Solder Reflow Integration: surface-mount packaging creates a slim, unobtrusive design by integrating components directly onto the FPCB. Electroplated Ion-Selective Electrodes (ISEs): palladium and silver layers enhance sensitivity for potentiometric sodi…	NO	NA	YES	NA	2015	Rose, Daniel P.; Ratterman, Michael E.; Griffin, Daniel K.; Hou, Linlin; Kelley-Loughnane, Nancy; Naik, Rajesh R.; Hagen, Joshua A.; Papautsky, Ian; Heikenfeld, Jason C.	Adhesive RFID Sensor Patch for Monitoring of Sweat Electrolytes	IEEE Transactions on Biomedical Engineering
3GEB3FTY	10.1016/j.aca.2024.342761	https://linkinghub.elsevier.com/retrieve/pii/S0003267024005622	YES	body strap worn on the abdomen or lower back		NO	monitor glucose levels in sweat	electrochemical	Electrochemical	The wearable sweat glucose sensing device exhibits a linear detection range of 0.1–1.5 mM of glucose, with a detection limit of 0.1 mM. This detection range corresponds with typical sweat glucose levels, making it suitable for monitoring fluctuations in glucose concentrations. The device demonstrated a high correlation coefficient (R²) of 0.997 during calibration using a commercial potentiostat. …	Diabetes	diabetes management	yes	-	-	sweat					yes								glucose					1	1	proof-of-concept	Human	laboratory testing + human studies (preliminary on-body trials)	NA	NA	Nanomaterial-Modified Electrode: a CNT-CNF nanocomposite boosts conductivity, surface area, and enzyme loading for high glucose sensitivity. Prussian Blue Electrodeposition: enhances redox activity and electrocatalysis, improving the detection of H₂O₂ from glucose oxidation. Chitosan Coating: provides a biocompatible layer for enzyme immobilization, ensuring stability and extended sensor lifespan…	NO	NA	YES	NA	2024	Promphet, Nadtinan; Thanawattano, Chusak; Buekban, Chatchai; Laochai, Thidarut; Lormaneenopparat, Panlop; Sukmas, Wiwittawin; Rattanawaleedirojn, Pranee; Puthongkham, Pumidech; Potiyaraj, Pranut; Leewattanakit, Worapong; Rodthongkum, Nadnudda	Smartphone based wearable sweat glucose sensing device correlated with machine learning for real-time diabetes screening	Analytica Chimica Acta
QDZIKGDT	10.1016/j.aca.2024.342441	https://linkinghub.elsevier.com/retrieve/pii/S0003267024002423	YES	skin-attached		NO	simultaneous detection of uric acid (UA) and dopamine (DA) in sweat	electrochemical	Electrochemical	For Dopamine (DA): Linear Response Range: 1–500 μM Detection Limit: 9.41 μM Sensitivity: 0.019 μA μM−1 cm−2 For Uric Acid (UA): Linear Response Range: 10–1000 μM Detection Limit: 9.09 μM Sensitivity: 0.026 μA μM−1 cm−2 The researchers conducted various tests, including: Anti-interference experiments to evaluate the sensor's selectivity in the presence of other potential interferents in sweat. Rep…		NA	yes	-	-	sweat								yes					Dopamine, Uric Acid					1	2	Prototype/Validation	Human	laboratory testing + human studies	NA	NA	High-Performance Nanomaterials: a CuNi-MOF@rGO nanocomposite enhances sensitivity and selectivity for uric acid and dopamine detection, leveraging high surface area, porosity, and excellent conductivity. Flexible Substrate: built on a durable, flexible polyimide (PI) substrate, the sensor ensures comfort, thermal stability, and chemical resistance for wearable use. Biomimetic Microfluidics: a 3D-…	NO	NA	NA	NA	2024	Wang, Cuncun; Zhang, Yong; Liu, Yiyi; Zeng, Xin; Jin, Changpeng; Huo, Danqun; Hou, Jingzhou; Hou, Changjun	A wearable flexible electrochemical biosensor with CuNi-MOF@rGO modification for simultaneous detection of uric acid and dopamine in sweat	Analytica Chimica Acta
AFBA9PGG	10.1016/j.bios.2021.113078	https://linkinghub.elsevier.com/retrieve/pii/S0956566321001159	YES	skin-attached		NO	non-invasive blood glucose monitoring	electrochemical	Electrochemical	Sensitivity of the G/CNTs/GOx Composite Textile: when tested in a three-electrode system using PBS solution, the G/CNTs/GOx composite textile (the working electrode) demonstrated high sensitivity to glucose: 574.26 μA mM−1 cm−2 for glucose concentrations ranging from 0 to 0.1 mM. 12.11 μA mM−1 cm−2 for glucose concentrations ranging from 1.0 to 30 mM. Sensitivity of the Two-Electrode Glucose Sens…	Diabetes	diabetes management	-	-	yes	interstitial fluid					yes								glucose					1	1	Validation	Human	In-vitro tests + ex-vivo tests + animal models + human studies	NA	NA	Two-Electrode System: Uses a single pair of electrodes for both ISF extraction via reverse iontophoresis and glucose detection, simplifying the design. Graphene/Carbon Nanotubes Composite Textiles: Provides excellent conductivity and flexibility, enabling efficient electrochemical reactions and wearability. Simple Fabrication: The composite material is synthesized using a two-step chemical vapor …	NO	NA	NA	NA	2021	Yao, Yao; Chen, Jingyao; Guo, Yuhan; Lv, Tian; Chen, Zilin; Li, Ning; Cao, Shaokui; Chen, Bingdi; Chen, Tao	Integration of interstitial fluid extraction and glucose detection in one device for wearable non-invasive blood glucose sensors	Biosensors and Bioelectronics
6NEEUXNI	10.1016/j.aca.2023.341754	https://linkinghub.elsevier.com/retrieve/pii/S0003267023009753	YES	patch		NO	real-time detection of glucose levels in human sweat	electrochemical	Electrochemical	The source states that the Ni-Co MOF modified CMP (NCMP) electrode achieved high sensitivity for glucose detection with a low detection limit of 6.78 μM and a wide linear range of 20 μM - 1.1 mM. The NCMP film electrode-based flexible sensor has a sensitivity of 71.62 μA mM− 1 cm− 2 for glucose detection	Diabetes	diabetes management	yes	-	-	sweat					yes								glucose					1	1	Proof-of-concept	Human	In-vitro tests + human studies	NA	NA	SVFDT Method: a novel, cost-effective fabrication approach combining stamping and vacuum filtration to create flexible three-electrode arrays, enabling scalability and reducing dependency on specialized equipment. Flexible Substrates: incorporates stretchable PDMS for enhanced comfort and adaptability to body movements. Advanced Nanomaterials: uses MWCNTs to boost electrode conductivity and durab…	NO	NA	NA	NA	2023	Xia, Youyuan; Su, Tong; Mi, Ziyi; Feng, Ziyou; Hong, Yawen; Hu, Xiaoya; Shu, Yun	Wearable electrochemical sensor based on bimetallic MOF coated CNT/PDMS film electrode via a dual-stamping method for real-time sweat glucose analysis	Analytica Chimica Acta
PLTIUXQL	10.1177/2472630318759257	https://www.ncbi.nlm.nih.gov/pubmed/29447045	YES	skin-attached		NO	monitoring stress	electrochemical	Electrochemical impedance spectroscopy (EIS)	Detection of cortisol was shown for concentrations of 1 pg/mL to 200 ng/mL in both synthetic and perspired human sweat,		NA	yes	-	-	sweat							yes						cortisol					1	1	prototype		Laboratory testing	NA	NA	A four-channel electrochemical impedance spectroscopy (EIS) analyzer module. Flexible chemi-impedance sensors fabricated with gold electrodes for wearable applications.	NO	NA	NA	NA	2018	Sankhala, D.; Muthukumar, S.; Prasad, S.	A Four-Channel Electrical Impedance Spectroscopy Module for Cortisol Biosensing in Sweat-Based Wearable Applications	SLAS Technol
Z322KISI	10.1126/sciadv.aau6356	https://www.ncbi.nlm.nih.gov/pubmed/30746456	YES	skin-attached		NO	monitoring of physiological status	electrochemical	Electrochemical + optical	The calibration curve indicates the ability to measure chloride levels with an accuracy of ±10mM		NA	yes	-	-	sweat													Chlorides					1	1	validation	Human	Human studies	NA	NA	The device incorporates thermographic capabilities, enabling simultaneous measurement of skin temperature along with sweat analysis	NO	NA	NA	NA	2019	Reeder, J. T.; Choi, J.; Xue, Y.; Gutruf, P.; Hanson, J.; Liu, M.; Ray, T.; Bandodkar, A. J.; Avila, R.; Xia, W.; Krishnan, S.; Xu, S.; Barnes, K.; Pahnke, M.; Ghaffari, R.; Huang, Y.; Rogers, J. A.	Waterproof, electronics-enabled, epidermal microfluidic devices for sweat collection, biomarker analysis, and thermography in aquatic settings	Sci Adv
MVR2F84L	10.1039/d0ay02014a	https://www.ncbi.nlm.nih.gov/pubmed/33290448	YES	skin-attached		NO	monitoring of sweat electrolyte concentrations during exercise	electrochemical	Electrochemical detection (ion chromatography).	Standard deviation experiments were conducted to quantify the accuracy of the IC method. Standard solutions with varying concentrations (0.1-100 ppm) of Na+, NH4+, K+, and Cl− ions were prepared and analyzed to determine the standard deviation at different concentration levels. The relative standard deviations (RSDs) for Cl− and Na+ were relatively small. For K+, the RSDs were more significant, l…		NA	yes	-	-	sweat													Na+, Cl-, K+.					1	3	Validation	Human	Human studies	NA	NA	A novel design of a sweat collection system is created. The sweat collection patch, that is made from hydrophilized foil and a double-sided acrylate adhesive, consists of a reservoir array that collects samples consecutively in time.	NO	NA	NA	NA	2020	Steijlen, A. S. M.; Bastemeijer, J.; Groen, P.; Jansen, K. M. B.; French, P. J.; Bossche, A.	A wearable fluidic collection patch and ion chromatography method for sweat electrolyte monitoring during exercise	Anal Methods
9ILIEEN9	10.1002/advs.202201507	http://www.ncbi.nlm.nih.gov/pubmed/35657078	YES	textile		NO	TEXTILE CHARACTERIZATION (WOUND-HEALING APPLICATIONS - NO MOLECULAR/IONIC BIOMARKERS)						-	-	-																			1								NO	NA			2022	Chen, Shuo-Wen; Huang, Shih-Min; Wu, Han-Song; Pan, Wei-Pang; Wei, Shih-Min; Peng, Chih-Wei; Ni, I. Chih; Murti, Bayu Tri; Tsai, Meng-Lin; Wu, Chih- I.; Yang, Po-Kang	A Facile, Fabric Compatible, and Flexible Borophene Nanocomposites for Self-Powered Smart Assistive and Wound Healing Applications	Advanced Science (Weinheim, Baden-Wurttemberg, Germany)
R2PIKEJS	10.1002/adma.202108607	https://onlinelibrary.wiley.com/doi/10.1002/adma.202108607	YES	patch		minimally	real-time and continuous monitoring of sodium levels in interstitial fluid (ISF)	electrochemical	Electrochemical	Sensitivity: The sensor's sensitivity is reported as 5.61 mA mm⁻¹. This value represents the change in drain-source current per unit change in sodium concentration. A higher sensitivity value indicates that the sensor can detect smaller variations in sodium levels. Limit of Detection (LOD): The LOD is reported as 2.78 × 10⁻⁶ m. This value represents the lowest concentration of sodium that the sen…		NA	-	-	yes	interstitial fluid					yes		yes				yes		Sodium, pH, glucose, cortisol					1	4	Prototype/Validation	Human	in-vitro tests + animal models + human studies	NA	NA	Stretchable Microneedle Array: combines rigid microneedles for interstitial fluid (ISF) access with a stretchable substrate for skin conformability, enabling minimally invasive, long-term biomarker sampling. Extended Gate Field-Effect Transistor (EGFET): separates the sensing element from the transistor for enhanced sensitivity, stability, and rapid electrical detection, crucial for real-time mon…	NO	NA	NA	NA	2022	Zheng, Youbin; Omar, Rawan; Zhang, Rongjun; Tang, Ning; Khatib, Muhammad; Xu, Qi; Milyutin, Yana; Saliba, Walaa; Broza, Yoav Y.; Wu, Weiwei; Yuan, Miaomiao; Haick, Hossam	A Wearable Microneedle‐Based Extended Gate Transistor for Real‐Time Detection of Sodium in Interstitial Fluids	Advanced Materials
T2ALK3AC	10.1016/j.talanta.2023.124362	https://linkinghub.elsevier.com/retrieve/pii/S0039914023001133	YES	patch		NO	non-invasive monitoring of glucose and pH levels in human perspiration (sweat)	electrochemical	Electrochemical	Glucose Sensor: Sensitivity: The glucose sensor exhibited a high sensitivity of 69.64 μA mM− 1 cm− 2. This means that for every 1 millimolar (mM) change in glucose concentration, the sensor produces a current response of 69.64 microamperes (μA) per square centimeter (cm− 2) of the electrode's surface area. Limit of Detection (LOD): The LOD for glucose was calculated to be 0.23 μM (micromolar), si…		NA	yes	-	-	sweat					yes						yes		glucose, pH					1	2	Proof-of-concept	Human	laboratory testing + human studies	NA	NA	3D Porous Laser-Scribed Graphene (LSG): a unique architecture with a high surface area and interconnected pores enhances analyte interaction, sensitivity, and response time. Platinum Nanoparticle Integration: simultaneous incorporation of PtNPs boosts conductivity, electrocatalytic activity, and electron transfer, enabling precise glucose and pH detection. Hydroxyethyl Cellulose (HEC) Enhancement…	NO	NA	NA	NA	2023	Wang, Ying; Guo, Haojie; Yuan, Min; Yu, Jiabing; Wang, Zeping; Chen, Xianping	One-step laser synthesis platinum nanostructured 3D porous graphene: A flexible dual-functional electrochemical biosensor for glucose and pH detection in human perspiration	Talanta
CE4VVVVC	10.1007/s00216-020-02939-4	https://www.ncbi.nlm.nih.gov/pubmed/32989512	YES	skin-attached		NO	monitoring sweat	electrochemical	Electrochemical (voltammetry, potentiometry, impedance)	A potentiometric potassium-ion-selective electrode in combination with an electrodeposited Ag/AgCl reference electrode (RE) enabled the detection of potassium ions in the entire physiologically relevant range (1 to 500 mM) with a fast response time, unaffected by the presence of main interfering ions and sweat-collecting materials. Using glucose and lactate oxidases, lower limits of detection of …		NA	yes	-	-	sweat					yes	yes							glucose, lactate, K+, electrolytes					1	4	Prototype		In-vitro tests	NA	NA	Multi-analyte sensing using exclusively laser-induced graphene (LIG)-based planar electrode systems was developed for sweat analysis. LIG provides 3D structures of graphene, can be manufactured easier than any other carbon electrode also on large scale, and in form of electrodes: hence, it is predestinated for affordable, wearable point-of-care sensors.	NO	NA	NA	NA	2021	Bauer, M.; Wunderlich, L.; Weinzierl, F.; Lei, Y.; Duerkop, A.; Alshareef, H. N.; Baeumner, A. J.	Electrochemical multi-analyte point-of-care perspiration sensors using on-chip three-dimensional graphene electrodes	Anal Bioanal Chem
PI3SG7T3	10.1016/j.aca.2022.339843	https://linkinghub.elsevier.com/retrieve/pii/S0003267022004147	YES	patch		NO	real-time detection and monitoring of uric acid (UA) levels in human sweat	electrochemical	Electrochemical	The wearable sweat UA sensor exhibits a high sensitivity for UA detection with a low detection limit of 0.34 μM and a linear range of 2 μM to 70 μM. The researchers validated the accuracy of the sensor by comparing its measurements to those obtained using a commercially available colorimetric assay kit. The results showed a strong correlation, with a Pearson correlation coefficient of 0.9897.	Metabolic Syndrome	management of gout, CVD and kidney diseases	yes	-	-	sweat								yes					Uric acid (UA)					1	1	Prototype/Validation	Human	In-vitro tests + human studies	NA	NA	Hydrophilic MOFs (MAF-7): protects uricase enzyme from degradation and enhances sensitivity by creating channels for efficient UA transport. Flexible Microfluidic Chip: enables efficient sweat collection while reducing errors from evaporation or contamination. Flexible Polyimide Substrate: provides conformal wearability, ensuring comfort, reliability, and durability under mechanical stress. Wirel…	NO	NA	NA	NA	2022	Xiao, Jingyu; Luo, Yong; Su, Lei; Lu, Jiafa; Han, Wei; Xu, Tailin; Zhang, Xueji	Hydrophilic metal-organic frameworks integrated uricase for wearable detection of sweat uric acid	Analytica Chimica Acta
2UXW4UX5	10.1021/acssensors.3c00708	https://www.ncbi.nlm.nih.gov/pubmed/37289663	YES	skin-attached		NO	Continuous sweat lactate monitoring in sports	electrochemical	Electrochemical	The sensor covering the range expected for lactate in sweat (1-20 mM), with appropriate sensitivity (-12.5 ± 0.53 nA mM-1), shows an acceptable response time (<90 s), and the influence of changes in pH, temperature, and flow rate are neglectable.		NA	yes	-	-	sweat						yes							lactate					1	1	Validation	Human	Human studies	NA	NA	The novelty of the system is threefold: advanced microfluidics design for sweat collection and analysis, an analytically validated lactate biosensor based on a rational design of an outer diffusion-limiting membrane, and an integrated circuit for signal processing with a custom smartphone application.	NO	NA	YES	NA	2023	Xuan, X.; Chen, C.; Molinero-Fernandez, A.; Ekelund, E.; Cardinale, D.; Swaren, M.; Wedholm, L.; Cuartero, M.; Crespo, G. A.	Fully Integrated Wearable Device for Continuous Sweat Lactate Monitoring in Sports	ACS Sens
TFJLJMC5	10.1016/j.bios.2024.116697	https://linkinghub.elsevier.com/retrieve/pii/S0956566324007036	YES	patch		minimally	real-time, continuous monitoring of fitness-related biomarkers in interstitial fluid	electrochemical	Electrochemical	Good Correlation with Standards: on-body trials show "reliable performance" when compared to commercial glucose and lactate blood strips and a breathalyzer, suggesting reasonable accuracy. Linear Response Characteristics: in vitro tests reveal a consistent linear correlation between sensor-generated electrical current and biomarker concentrations (glucose, lactate, alcohol), indicating responsive…		NA	-	-	yes	interstitial fluid					yes	yes							Glucose, Lactate, Alcohol					1	3	Validation	Human	in-vitro tests + animal models + human studies	NA	NA	The key technological innovation in the wearable microneedle sensor is the integration of 3D-printed microneedle arrays with electrochemical sensing technology. This combination allows for continuous, real-time monitoring of multiple biomarkers in interstitial fluid.	NO	NA	NA	NA	2024	Zhong, Geng; Liu, Qingzhou; Wang, Qiyu; Qiu, Haoji; Li, Hanlin; Xu, Tailin	Fully integrated microneedle biosensor array for wearable multiplexed fitness biomarkers monitoring	Biosensors and Bioelectronics
INWQM67K	10.3390/s19122713	https://www.ncbi.nlm.nih.gov/pubmed/31212895	YES	skin-attached		NO	human stress monitoring	electrochemical	Electrochemical	All ISFETs demonstrate a linear response to nitrate activity within the concentration range of 10^(−4) M to 10^(−1) M. The concentration range of nitrate in saliva is approximately 10^(−4) M to 10^(−3) M. Consequently, NO3-ISFETs are well-suited for nitrate measurement in saliva.		NA	-	yes	-	saliva													nitrate					1	1	prototype		Laboratory testing	NA	NA	Polyurethane matrix membranes for the salivary nitrate ISFETs. The research focuses on investigating specific polyurethane materials like KP-13, Pellethane®, and P7281-PU to mitigate the initial drift commonly observed in ISFET measurements.	NO	NA	NA	NA	2019	Osaki, S.; Kintoki, T.; Moriuchi-Kawakami, T.; Kitamura, K.; Wakida, S. I.	Investigation of Polyurethane Matrix Membranes for Salivary Nitrate ISFETs to Prevent the Drift	Sensors (Basel)
LQ7BWVJL	10.3390/bios13070684	https://www.ncbi.nlm.nih.gov/pubmed/37504083	YES	textile		NO	noninvasive monitoring of glucose levels in sweat	electrochemical	Electrochemical	The screen-printed textile-based glucose biosensor achieved a linear response in the range of 20-1000 µM of glucose concentration and high sensitivity (18.41 µA mM-1 cm-2, R2 = 0.996). In addition, the biosensors show high selectivity toward glucose among other interfering analytes and excellent stability over 30 days of storage.		NA	yes	-	-	sweat					yes								glucose					1	1	Prototype/Validation	Human	In-vitro + in-vivo (human)	NA	NA	A screen-printed electrochemical sensor on a textile substrate for monitoring glucose levels in sweat. The fabrication method is cost-effective and can be easily integrated with everyday clothing using existing clothing manufacturing processes at an industrial scale. The sensors are fabricated layer-by-layer with a screen-printing method that enables the fabrication of customized electrode geomet…	NO	NA	NA	NA	2023	Khosravi, S.; Soltanian, S.; Servati, A.; Khademhosseini, A.; Zhu, Y.; Servati, P.	Screen-Printed Textile-Based Electrochemical Biosensor for Noninvasive Monitoring of Glucose in Sweat	Biosensors (Basel)
4KILEFWL	10.1016/j.bios.2022.114955	https://linkinghub.elsevier.com/retrieve/pii/S0956566322009952	YES	not specified	microneedle array	minimally	transdermal monitoring of pH levels in interstitial fluid (ISF).	electrochemical	Electrochemical	The wearable pH sensor operates from pH 4.0 to 8.6 with a sensitivity of 62.9 mV per pH unit and an accuracy of ±0.036 pH units.		NA	-	-	yes	interstitial fluid											yes		pH					1	1	Proof-of-concept		In-vitro, laboratory testing, ex-vivo (animal models)	NA	NA	The High-Density Polymeric Microneedle Array (PMNA) enables painless, minimally invasive access to interstitial fluid (ISF) through microscopically small needles, avoiding pain receptors and blood vessels. Fabricated using cost-effective soft lithography with PDMS molds, it simplifies production compared to silicon-based microneedles. Tailored to a height of ~250 μm, the microneedles ensure accur…	NO	NA	NA	NA	2023	Dervisevic, Muamer; Dervisevic, Esma; Esser, Lars; Easton, Christopher D.; Cadarso, Victor J.; Voelcker, Nicolas H.	Wearable microneedle array-based sensor for transdermal monitoring of pH levels in interstitial fluid	Biosensors and Bioelectronics
UGXD7F26	10.3390/bios9010013	https://www.ncbi.nlm.nih.gov/pubmed/30654428	YES	not specified		NO	simultaneous detection of multiple biomarkers in sweat	electrochemical	Electrochemical	The device can detect alcohol, glucose, and lactate within physiologically relevant ranges. For instance, it can measure alcohol levels from 0.1 to 100 mg/dL, glucose from 0.1 to 50 mg/dL, and lactate from 1 to 100 mM.The limit of detection for biomarker detection in human sweat was established to be one logarithmic concentration lower and the dynamic range was established to be one logarithmic c…		NA	yes	-	-	sweat					yes	yes							alcohol, glucose, lactate					1	3	prototype		Laboratory testing	NA	NA	Non-faradaic biosensor. Nanotextured ZnO Films for Enhanced Sensing.	NO	NA	NA	NA	2019	Bhide, A.; Cheeran, S.; Muthukumar, S.; Prasad, S.	Enzymatic Low Volume Passive Sweat Based Assays for Multi-Biomarker Detection	Biosensors (Basel)
RRQHZWAL	10.1016/j.bios.2023.115360	https://linkinghub.elsevier.com/retrieve/pii/S0956566323003020	YES	skin-attached		NO	simultaneous and accurate monitoring of pH and tyrosine (Tyr) levels in sweat	electrochemical	Electrochemical	High pH Sensitivity: demonstrates a sensitivity of -71.86 mV/pH with excellent linearity (R² = 0.9975), ensuring precise pH detection. Reproducible pH Measurements: achieves consistent results with a low relative standard deviation (RSD) of 1.6% across multiple sensors. Low Tyrosine Detection Limit: detects tyrosine at concentrations as low as 3.3 μM, ensuring high sensitivity. Broad Tyrosine Lin…		NA	yes	-	-	sweat											yes		Tyrosine, pH					1	2	Prototype/Validation	Human	in-vitro tests + laboratory testing + human studies (preliminary)	NA	NA	Multifunctional Conductive Hydrogel (TA-Ag-CNT-PANI): combines antibacterial silver nanoparticles (TA-Ag), conductive and flexible carbon nanotubes (CNTs), and pH/tyrosine-responsive polyaniline (PANI) for precise sensing. Integrated Iontophoresis System: enables controlled sweat stimulation, bypassing reliance on external factors. pH-Calibrated Tyrosine Detection: simultaneous pH monitoring enha…	NO	NA	NA	NA	2023	Xu, Zhenying; Qiao, Xiujuan; Tao, Runzhang; Li, Yanxin; Zhao, Shuju; Cai, Yuchen; Luo, Xiliang	A wearable sensor based on multifunctional conductive hydrogel for simultaneous accurate pH and tyrosine monitoring in sweat	Biosensors and Bioelectronics
7BMN76BK	10.3390/bios13020157	https://www.ncbi.nlm.nih.gov/pubmed/36831923	YES	chip	microfluidic	NO	exercise training monitoring	Colorimetric	Colorimetric	Under optimized conditions, this proposed chip can detect glucose with low concentrations from 0.05 mM to 0.40 mM, with a pH range of 4.0 to 6.5 for human sweat.		NA	yes	-	-	sweat					yes						yes		glucose, pH					1	2	Prototype/Validation	Human	Human studies	NA	NA	a wearable microfluidic sweat chip combined with smartphone image processing to realize non-invasive in situ analysis of epidermal sweat for sports practitioners. The polydimethylsiloxane (PDMS) based chip was modified with nonionic surfactants to ensure good hydrophilicity for the automatic collection of sweat.	NO	NA	YES	NA	2023	Liu, D.; Liu, Z.; Feng, S.; Gao, Z.; Chen, R.; Cai, G.; Bian, S.	Wearable Microfluidic Sweat Chip for Detection of Sweat Glucose and pH in Long-Distance Running Exercise	Biosensors (Basel)
6UL3HGJQ	10.3390/molecules28197000	https://www.ncbi.nlm.nih.gov/pubmed/37836843	YES	not specified		NO	selective quantification of potassium ion (K+) levels in human sweat	electrochemical	Electrochemical	The sensor exhibits a linear range from 10 μM to 100 mM for potassium ion detection, with a sensitivity of 54.7 mV/decade. The sensor demonstrates good reproducibility over 10 cycles in 10 mM KCl. The sensor exhibits minimal interference from 100 mM Na+ and other common sweat constituents.		NA	yes	-	-	sweat													K+					1	1	Validation	Human	Human studies	NA	NA	Printed electrodes using β-cyclodextrin functionalized reduced graphene oxide (β-CD-RGO) for selective K+ quantification in sweat. The β-CD prevents the aggregation of RGO sheets while also providing selective binding sites for K+ capture. Electrodes were fabricated by screen printing the β-CD-RGO ink onto conductive carbon substrates.	NO	NA	NA	NA	2023	Liu, R.; Shi, X.	Preparation of beta-Cyclodextrin Functionalized Platform for Monitoring Changes in Potassium Content in Perspiration	Molecules
XL9WGNP4	10.1109/TBME.2017.2764507	https://www.ncbi.nlm.nih.gov/pubmed/29989933	YES	not specified		NO	quantify stress level through ECG, EDA, and EEG analysis (in comparison with saliva cortisol levels).	Electrical	Electrophysiology	The classification algorithm, based on significant features, provided satisfactory outcomes with 86% accuracy. Furthermore, correlation analysis showed that the observed changes in physiological features were consistent with the trend of salivary cortisol levels (R 2 = 0.714).		NA	-	yes	-	saliva							yes						cortisol					1	1	Validation	Human	Human studies	NA	NA	Wearable physiological sensors system, based on ECG, EDA, and EEG, to capture human stress	NO	NA	YES	NA	2018	Betti, S.; Lova, R. M.; Rovini, E.; Acerbi, G.; Santarelli, L.; Cabiati, M.; Del Ry, S.; Cavallo, F.	Evaluation of an Integrated System of Wearable Physiological Sensors for Stress Monitoring in Working Environments by Using Biological Markers	IEEE Trans Biomed Eng
9ZAPL828	10.1016/j.talanta.2020.121484	https://linkinghub.elsevier.com/retrieve/pii/S003991402030775X	YES	textile		NO	real-time, non-invasive lactate monitoring in sweat	electrochemical	Electrochemical	The wearable textile electrochemical biosensor exhibits high sensitivity for lactate detection, achieving a sensitivity of 19.13 μA/mM cm2 in a phosphate-buffered solution (PBS) and 14.6 μA/mM cm2 in artificial sweat. This sensitivity remains consistent even when the device is stretched, showcasing its robustness and reliability for real-world use5. Here's a further breakdown of the sensor's sens…		NA	yes	-	-	sweat						yes							lactate					1	1	Proof-of-concept	Human	laboratory testing + in-vitro tests + human study (preliminary)	NA	NA	Stretchable Gold Fiber Electrodes: highly conductive, strain-insensitive gold fibers, created via dry-spinning, integrate seamlessly into textiles for enhanced wearability. Wrinkled Gold Film Coating: increased electrochemically active surface area boosts enzyme immobilization and lactate detection sensitivity. Flexible Counter Electrode: elastomeric gold fibers replace rigid materials, enhancing…	NO	NA	NO	NA	2021	Wang, Ren; Zhai, Qingfeng; An, Tiance; Gong, Shu; Cheng, Wenlong	Stretchable gold fiber-based wearable textile electrochemical biosensor for lactate monitoring in sweat	Talanta
HCPMFGBN	10.1038/s41551-023-01059-5	https://www.ncbi.nlm.nih.gov/pubmed/37349389	YES	patch	wireless	NO	monitoring C-reactive protein (CRP) in sweat	electrochemical	Electrochemical	This technology realizes highly sensitive detection of ultra-low-level inflammatory proteins in situ with a 6 orders-of-magnitude (picomolar level) improvement in sensitivity	Inflammation	Inflammatory conditions (particularly chronic diseases) management	yes	-	-	sweat													C-reactive protein					1	1	Validation	Human	Human studies	NA	NA	The device integrates iontophoretic sweat extraction, microfluidic channels for sweat sampling and for reagent routing and replacement, and a graphene-based sensor array for quantifying CRP (via an electrode functionalized with anti-CRP capture antibodies-conjugated gold nanoparticles), ionic strength, pH and temperature for the real-time calibration of the CRP sensor.	NO	NA	NA	NA	2023	Tu, J.; Min, J.; Song, Y.; Xu, C.; Li, J.; Moore, J.; Hanson, J.; Hu, E.; Parimon, T.; Wang, T. Y.; Davoodi, E.; Chou, T. F.; Chen, P.; Hsu, J. J.; Rossiter, H. B.; Gao, W.	A wireless patch for the monitoring of C-reactive protein in sweat	Nat Biomed Eng
U2NIYAGN	10.1177/2472630319882003	https://www.ncbi.nlm.nih.gov/pubmed/31617455	YES	not specified		NO	analyzing biomarkers in sweat	electrochemical	Electrochemical (non-faradaic electrochemical impedance spectroscopy (EIS)).	A strong linear relationship between the sensor response and the analyte concentration for both biomarkers. This linearity is reflected in the high R-squared values (R² > 0.95) reported for both cortisol (5-200 ng/mL) and chloride (10-100 mM) detection in both types of samples. The researchers tested the device using pooled human sweat samples, demonstrating its applicability in a real-world biol…		NA	yes	-	-	sweat							yes						Chloride, cortisol					1	2	Validation		In-vitro tests + laboratory testing	NA	NA	Label-free affinity biosensing is achieved by using a two-electrode electrochemical system on a flexible substrate suitable for wearable applications. The electrochemical stability of the fabricated electrodes for biosensing applications was studied by open-circuit potential measurements.	EnLiSense LLC	USA	NA	NA	2020	Ganguly, A.; Rice, P.; Lin, K. C.; Muthukumar, S.; Prasad, S.	A Combinatorial Electrochemical Biosensor for Sweat Biomarker Benchmarking	SLAS Technol
EZSP36YR	10.1109/TBCAS.2023.3286528	https://www.ncbi.nlm.nih.gov/pubmed/37318976	YES	patch		NO	monitoring of sweat biomarkers during exercise	electrochemical	Electrochemical	Analysis of the sweat biomarkers collected from the printed patch prototype shows that their real-time measurements correlate well (correlation coefficient ≥ 0.65) with other physiological biomarkers such as heart rate and regional sweat rate collected in the same session. We show for the first time, that the real-time sweat sodium and potassium concentration biomarker measurements from the print…		NA	yes	-	-	sweat													Na+, K+					1	2	prototype	Human	Human studies	NA	NA	A wearable sweat biomonitoring patch incorporating printed electrochemical sensors into a plastic microfluidic sweat collector and data analysis that shows the real-time recorded sweat biomarkers can be used to predict a physiological biomarker. The system was placed on subjects carrying out an hour-long exercise session and results were compared to a wearable system using potentiometric robust s…	NO	NA	NA	NA	2023	Wang, S.; Rovira, M.; Demuru, S.; Lafaye, C.; Kim, J.; Kunnel, B. P.; Besson, C.; Fernandez-Sanchez, C.; Serra-Graells, F.; Margarit-Taule, J. M.; Aymerich, J.; Cuenca, J.; Kiselev, I.; Gremeaux, V.; Saubade, M.; Jimenez-Jorquera, C.; Briand, D.; Liu, S. C.	Multisensing Wearables for Real-Time Monitoring of Sweat Electrolyte Biomarkers During Exercise and Analysis on Their Correlation With Core Body Temperature	IEEE Trans Biomed Circuits Syst
HN5YMJ9X	10.1016/j.bios.2022.114005	https://linkinghub.elsevier.com/retrieve/pii/S0956566322000458	YES	skin-attached		NO	detection and quantification of copper excreted in sweat	electrochemical	Electrochemical detection + impedance-based measurements	Copper Sensor (SPCE) The copper sensor, based on a screen-printed carbon electrode (SPCE) and SWASV, demonstrated a limit of detection (LOD) of 396 ppb. Its linear range extends up to 2500 ppb. The sensor exhibits a sensitivity of 2.3 nA/ppb. A recovery test with 1500 ppb of copper yielded a calculated concentration of 1675 ppb, resulting in a recovery of 111.6%. The researchers acknowledge that …		NA	yes	-	-	sweat													Copper ions (+ conductivity)					1	1	Prototype		In-vitro tests (with artificial sweat)	NA	NA	All-Printed, Flexible Design: Incorporates inkjet-printed silver nanoparticle (AgNP) electrodes, screen-printed carbon electrodes, and laser-cut microfluidic channels for lightweight, body-conforming wearability. Integrated Multi-Sensor System: Features sensors for copper detection (SWASV), conductivity (electrolyte balance), and sweat volume (impedance changes), allowing detailed and real-time s…	NO	NA	YES	NA	2022	Yang, Qiuyue; Rosati, Giulio; Abarintos, Vernalyn; Aroca, Miguel Angel; Osma, Johann F.; Merkoçi, Arben	Wearable and fully printed microfluidic nanosensor for sweat rate, conductivity, and copper detection with healthcare applications	Biosensors and Bioelectronics
XEBUXF69	10.1002/adma.202201768	https://onlinelibrary.wiley.com/doi/10.1002/adma.202201768	YES	skin-attached		NO	real-time, non-invasive monitoring of specific metabolites in sweat, particularly vitamin C and uric acid.	electrochemical	Electrochemical	Vitamin C Detection: Linear Range: the sensor demonstrates a good linear relationship between current intensity and vitamin C concentration over a wide range of 10–1190 µM. This indicates its ability to accurately quantify vitamin C levels across a broad spectrum of concentrations. Correlation Coefficient: the correlation coefficient for vitamin C detection is reported as 0.9997, indicating a ver…	Metabolic Syndrome	metabolic conditions and nutritional monitoring	yes	-	-	sweat								yes					ascorbic acid, uric acid					1	2	Prototype	Human	Laboratory testing + in-vitro studies + human studies (preliminary)	NA	NA	Conductive Metal-Organic Framework (cMOF): utilizes Ni3HHTP2 for its inherent conductivity, porous structure, and catalytic properties, enabling sensitive, enzyme-free detection of vitamin C and uric acid. Flexible Nanocellulose Substrate: features a breathable bacterial nanocellulose (BNC) substrate for conformal skin adhesion, enhanced comfort, and durability during movement. Wireless Data Tran…	NO	NA	YES	NA	2022	Yang, Xue; Yi, Junqi; Wang, Ting; Feng, Yanan; Wang, Jianwu; Yu, Jing; Zhang, Feilong; Jiang, Zhi; Lv, Zhisheng; Li, Haicheng; Huang, Tao; Si, Duanhui; Wang, Xiaoshi; Cao, Rong; Chen, Xiaodong	Wet‐Adhesive On‐Skin Sensors Based on Metal–Organic Frameworks for Wireless Monitoring of Metabolites in Sweat	Advanced Materials
JJ48E3SD	10.1007/s00216-020-02430-0	http://link.springer.com/10.1007/s00216-020-02430-0	YES	skin-attached		NO	non-invasive detection of cortisol levels in human sweat.	electrochemical	Electrochemical	Limit of Detection (LOD): 2.0 ± 0.4 ng/mL. An LOD of 2.0 ng/mL signifies the sensor's capability to detect minute traces of cortisol in sweat, making it suitable for tracking subtle changes in cortisol levels. Dynamic Range: 6–60 ng/mL. The reported dynamic range falls within the physiologically relevant range of cortisol levels in human sweat (8–50 ng/mL), demonstrating the sensor's suitability …	Stress	Stress monitoring and management	yes	-	-	sweat							yes						cortisol					1	1	Validation	Human	laboratory experiments + a human studies (a pilot human study)	NA	NA	Flexible and Stretchable Substrate: Built on micropillared PDMS with Ecoflex, it conforms to skin contours, stretches up to 100% without performance loss, ensuring comfort and reliability for sweat collection. Nanoporous Conductive Film: Combines carbon nanotubes (CNTs) and cellulose nanocrystals (CNCs) for high conductivity and sensitivity, creating a robust scaffold for molecularly imprinted po…	NO	NA	NA	NA	2020	Mugo, Samuel M.; Alberkant, Jonathan	Flexible molecularly imprinted electrochemical sensor for cortisol monitoring in sweat	Analytical and Bioanalytical Chemistry
CNL5PLGL	10.3390/s21051642	https://www.ncbi.nlm.nih.gov/pubmed/33652955	YES	not specified		NO	saliva monitoring for early diagnosis of diseases	electrochemical	Electrochemical	The sensor exhibits good sensitivity, measured as 58.9 mV/decade. The sensor demonstrates selectivity for sodium ions, with a selectivity coefficient (log K) of -2.68 for potassium. The sensor has a broad detection range of 5 × 10^-5 ≈ 1 M and a low detection limit of 4.27 × 10^-5 M.		NA	-	yes	-	saliva													sodium					1	1	Prototype/Validation	Human	Human studies	NA	NA	A flexible system, including electrochemical sensors and a Bluetooth-enabled wireless circuit, has an exceptionally small form factor,showing an excellent possibility for non invasive,portable disease diagnosis.	NO	NA	NA	NA	2021	Lim, H. R.; Lee, S. M.; Mahmood, M.; Kwon, S.; Kim, Y. S.; Lee, Y.; Yeo, W. H.	Development of Flexible Ion-Selective Electrodes for Saliva Sodium Detection	Sensors (Basel)
D8GPBM8B	10.1016/j.bios.2023.115412	https://linkinghub.elsevier.com/retrieve/pii/S0956566323003548	YES	skin-attached		NO	on-demand sweat bioanalysis	electrochemical	Electrochemical	The glucose sensor exhibits a linear response to glucose concentrations ranging from 5.0 to 50 μM, as demonstrated by the chronoamperometric measurements. The accuracy of the glucose sensor was assessed by comparing its measurements with those obtained from a commercial glucometer using blood samples. There is a close correlation between the sweat glucose levels measured by the wearable sensor an…	Diabetes	monitoring and assisting with the management of diabetes and stress-related conditions.	yes	-	-	sweat					yes		yes						glucose, cortisol					1	2	Proof-of-concept	Human	Human studies	NA	NA	The device utilizes a thermoresponsive hydrogel made from poly(N-isopropylacrylamide) (pNIPAM) to passively collect sweat without requiring external stimulation like exercise or heat.1234 This is a significant advancement compared to conventional sweat collection methods that can distort biomarker levels and may not be suitable for all individuals.	NO	NA	NA	NA	2023	Chen, Yichen; Ma, Biao; Zuo, Yinxiu; Chen, Gangsheng; Hao, Qing; Zhao, Chao; Liu, Hong	Versatile sweat bioanalysis on demand with hydrogel-programmed wearables	Biosensors and Bioelectronics
L7EPPAFX	10.1002/adma.202008465	https://onlinelibrary.wiley.com/doi/10.1002/adma.202008465	YES	patch		NO	rapid, stress-free detection of cortisol levels in sweat	electrochemical	Electrochemical	Sensitivity in Buffer Solution (PBS): 38.8 nA log[nM]⁻¹. Sensitivity in Artificial Sweat (AS): 60.31 nA log[nM]⁻¹, indicating enhanced performance due to specific interactions with the sweat matrix. Detection Threshold: capable of detecting changes at 1 nM cortisol concentration, enabling precise monitoring of subtle fluctuations. The device's accuracy is validated by a strong correlation with st…	Stress	monitoring stress levels	yes	-	-	sweat							yes						cortisol					1	1	validation	Human	in-vitro tests + human studies	NA	NA	Molecularly Imprinted Polymer (MIP) Technology: a highly selective "lock-and-key" mechanism ensures precise cortisol detection by binding specifically to cortisol molecules. Integrated Prussian Blue Redox Probes: embedded in the MIP layer, these probes enable direct electrochemical signaling without external labels, simplifying the detection process. Rapid Chronoamperometric Detection: optimized …	NO	NA	NA	NA	2021	Tang, Wanxin; Yin, Lu; Sempionatto, Juliane R.; Moon, Jong‐Min; Teymourian, Hazhir; Wang, Joseph	Touch‐Based Stressless Cortisol Sensing	Advanced Materials
YUUB64D6	10.3390/bios12121095	https://www.ncbi.nlm.nih.gov/pubmed/36551062	YES	skin-attached		NO	measuring prognostic TBI markers relevant to monitoring of a TBI post-injury	electrochemical	Electrochemical	The LOD for GFAP detection in the sweat analog was estimated to be 14 pg/mL using EIS. The LOD for IL-6 was estimated to be 10 pg/mL using EIS	Neuro	Traumatic Brain Injuries management	yes	-	-	sweat													glial fibrillary acidic protein (GFAP) and Interleukin-6 (IL6)					1	2	Proof-of-concept		In-vitro tests	NA	NA	SWEATSENSER is a noninvasive enabling technology that enables baseline inflammatory response tracking (Flexible Substrates + High-Sensitivity Sensors + Multiplexed Sensing).	EnLiSense LLC	USA	NA	NA	2022	Shahub, S.; Lin, K. C.; Muthukumar, S.; Prasad, S.	A Proof-of-Concept Electrochemical Skin Sensor for Simultaneous Measurement of Glial Fibrillary Acidic Protein (GFAP) and Interleukin-6 (IL-6) for Management of Traumatic Brain Injuries	Biosensors (Basel)
DWD9G8IH	10.1016/j.talanta.2022.124122	https://linkinghub.elsevier.com/retrieve/pii/S0039914022009183	YES	skin-attached		NO	non-invasive monitoring of lactate levels in interstitial fluid (ISF)	electrochemical	Electrochemical	The in-vitro characterization of the lactate biosensor revealed a limit of detection of 0.15 mM. This means the sensor can reliably detect lactate concentrations at or above this value. The sensor exhibited a linear response to lactate concentrations ranging from 1 mM to 5 mM1. This suggests the sensor's output signal is directly proportional to the lactate concentration within this range. The ca…		NA	-	-	yes	interstitial fluid						yes							Lactate					1	1	Prototype/Validation	Human	Human studies	NA	NA	The most significant innovation is the all-in-one platform that combines reverse iontophoresis (RI) for ISF extraction with an enzymatic amperometric biosensor for lactate detection on a single, flexible, and adhesive patch.This integration eliminates the need for separate extraction and analysis steps, enabling rapid, point-of-care lactate monitoring	NO	NA	NA	NA	2023	De La Paz, Ernesto; Saha, Tamoghna; Del Caño, Rafael; Seker, Sumeyye; Kshirsagar, Nikhil; Wang, Joseph	Non-invasive monitoring of interstitial fluid lactate through an epidermal iontophoretic device	Talanta
T9NTIH34	10.1002/adma.202403758	https://www.ncbi.nlm.nih.gov/pubmed/38733567	YES			Minimally	transdermal sensing of enzyme biomarkers.	electrochemical	Electrochemical	The epidermal microneedle sensor also responded with good linearity, and sensi-tivity against increasing concentrations of Tyr (between 0.3 and0.7 mg mL−1 ; R2 > 0.99, 5.52 ± 0.58 mA g mL−1 cm−2 , with avery low limit of detection (0.06 mg mL−1 ; S/N = 3). The reproducibility of the epidermal patch sensor is also very high (RSD< 5% (n = 5) for both device-to-device or repetitive measurements usin…	Cancer	Melanoma detection	-	-	yes	interstitial fluid													Tyrosinase (Tyr)					1	1	Proof-of-concept		Ex-vivo	NA	NA	A wearable bioelectronic patch is established for transdermal sensing of the melanoma biomarker, tyrosinase (Tyr), using a microneedle array integrated with a surface-bound chemo-responsive smart probe to enable target-specific electrochemical detection of Tyr directly from human skin tissue.	NO	NA	NA	NA	2024	Poursharifi, N.; Hassanpouramiri, M.; Zink, A.; Ucuncu, M.; Parlak, O.	Transdermal Sensing of Enzyme Biomarker Enabled by Chemo-Responsive Probe-Modified Epidermal Microneedle Patch in Human Skin Tissue	Adv Mater
EGMLIHS2	10.1016/j.bios.2024.116012	https://linkinghub.elsevier.com/retrieve/pii/S0956566324000150	YES	skin-attached		NO	non-invasive detection of specific metabolites in sweat	electrochemical	Electrochemical	Tyrosine (Tyr): the LOD for tyrosine detection is reported as 5.11 μM. This indicates the sensor's ability to detect very low concentrations of tyrosine in sweat. Uric Acid (UA): the LOD for uric acid is even lower, reaching 1.37 μM, showcasing the device's exceptional sensitivity for this metabolite. The researchers attribute this high sensitivity to several factors, including: FeNCs/LIG Electro…	Metabolic Syndrome	monitoring metabolic health and nutritional status.	yes	-	-	sweat								yes					Tyrosine, Uric Acid					1	2	Prototype		laboratory testing + in-vitro tests	NA	NA	Iron Nano-Catalysts on Laser-Induced Graphene (FeNCs/LIG): combines a 3D porous, conductive LIG substrate with iron nano-catalysts for enhanced electrocatalytic activity and sensitivity. Hydrogel-Based Dual-Channel Microfluidic Chip: ensures efficient sweat collection and wearability, with separate channels enabling simultaneous multi-metabolite detection (e.g., tyrosine and uric acid). Flexible …	NO	NA	NA	NA	2024	Zhao, Peng; Zhang, Yong; Liu, Yiyi; Huo, Danqun; Hou, Jingzhou; Hou, Changjun	Wearable electrochemical patch based on iron nano-catalysts incorporated laser-induced graphene for sweat metabolites detection	Biosensors and Bioelectronics
VXTKM3A9	10.1016/j.bios.2024.116354	https://linkinghub.elsevier.com/retrieve/pii/S0956566324003592	YES	patch		NO	continuous, non-invasive monitoring of glucose levels in sweat	electrochemical	Electrochemical	Linear Relationship: the research highlights a strong linear relationship between the glucose concentration and the sensor's current response. This linearity suggests a good degree of accuracy in measuring glucose levels within the specified detection range. Limit of Detection (LOD): the reported LOD of 0.762 μM indicates the sensor's ability to detect very low concentrations of glucose, suggesti…	Diabetes	diabetes management	yes	-	-	sweat					yes								glucose					1	1	Prototype/Validation	Human	laboratory testing + human studies (preliminary)	NA	NA	Single-Atom Catalyst (SAC): utilizes Pt atoms on Co₃O₄ nanorods and rGO for enhanced sensitivity and catalytic activity in glucose detection. Synergistic Catalysis: combines Pt, Co₃O₄, and rGO for superior glucose oxidation, confirmed by DFT calculations showing improved glucose binding and activity. Flexible Substrate: built on polyimide (PI) film for comfortable, body-conforming wear during phy…	NO	NA	YES	NA	2024	Zhang, Yong; Yang, Zhihao; Qiao, Cailin; Liu, Yiyi; Wang, Cuncun; Zeng, Xin; Hou, Jingzhou; Huo, Danqun; Hou, Changjun	Synergistic enhancement of wearable biosensor through Pt single-atom catalyst for sweat analysis	Biosensors and Bioelectronics
CXX6K392	10.1016/j.talanta.2023.124610	https://linkinghub.elsevier.com/retrieve/pii/S0039914023003612	YES	patch		NO	real-time, non-invasive monitoring of multiple biomarkers in sweat	electrochemical	Electrochemical	Sodium (Na+) Sensor: the Na+ sensor exhibits a sensitivity of 53.83 mV/decade. pH Sensor: the pH sensor demonstrates a sensitivity of 98.68 mV/decade. Glucose Sensor: the glucose sensor shows a sensitivity of 0.04 μA μM−1.		NA	yes	-	-	sweat					yes						yes		Na+, pH, Glucose					1	3	Prototype	Human	laboratory testing + human studies (preliminary)	NA	NA	All-Fabric Construction: made from breathable silk fabric, enhancing comfort, flexibility, and wearability over rigid materials. Janus Fabric for Sweat Transport: uses asymmetric wettability for one-way sweat flow, improving sensor performance and efficiency. Silk-Based Carbon Cloth Electrodes: biocompatible, flexible, and conductive electrodes created via carbonizing silk fibroin. Laser-Engraved…	NO	NA	NA	NA	2023	Zhang, Yingwen; Liao, Jianjun; Li, Zehao; Hu, Mingxu; Bian, Chao; Lin, Shiwei	All fabric and flexible wearable sensors for simultaneous sweat metabolite detection and high-efficiency collection	Talanta
LXY688CC	10.1016/j.bios.2017.06.053	https://linkinghub.elsevier.com/retrieve/pii/S0956566317304396	YES	patch		NO	quantitatively measuring wound biomarkers in situ	electrochemical	Electrochemical	Sensitivity: Linear response to uric acid concentrations from 0 to 800 µM with a strong correlation coefficient (R² = 0.995), indicating high accuracy. Reproducibility: Standard deviations (SDs) are under 7% across three measurements, demonstrating consistent performance. Stability: Maintains accuracy for up to 7 hours of continuous monitoring with a coefficient of variance (COV = 0.05). Specific…		NA	-	-	-	Simulated wound fluid								yes					uric acid (UA)					1	1	Proof-of-concept		in-vitro + laboratory testing	NA	NA	Embroidered Electrodes: Uses embroidery to integrate conductive threads onto flexible, breathable gauze, overcoming limitations of traditional screen-printing for porous materials. Ink-Coated Threads: Features carbon-coated working/counter electrodes and Ag/AgCl-coated reference electrodes, ensuring strong electrochemical performance and biocompatibility. Flexible Substrate: Gauze provides flexib…	NO	NA	NA	NA	2017	Liu, Xiyuan; Lillehoj, Peter B.	Embroidered electrochemical sensors on gauze for rapid quantification of wound biomarkers	Biosensors and Bioelectronics
AMMK95CX	10.1016/j.bios.2021.113270	https://linkinghub.elsevier.com/retrieve/pii/S0956566321003079	YES	head-mounted	band	NO	simultaneous detection and monitoring of lactate and sodium levels in human sweat	electrochemical	Electrochemical	Limits of Detection (LODs): Lactate: 3.61 mM Sodium: 0.16 mM Linear Ranges: the linear range is the concentration range over which the sensor's response is directly proportional to the analyte concentration. This is the range where the sensor provides the most accurate and reliable measurements. The reported linear ranges are: Lactate: 0–25 mM Sodium: 0.1–100 mM These ranges cover the clinically …		NA	yes	-	-	sweat						yes							lactate, Na+					1	2	Prototype/Validation	Human	laboratory testing + in-vitro tests + human studies (on-body and off-body testing)	NA	NA	ZnO Nanowire-Decorated Electrodes: ZnO nanowires enhance sensitivity with high surface area and efficient electron transport, and enable stable enzyme immobilization. Thread-Based Design: uses conductive threads for flexibility and wearability, allowing seamless integration into textiles like clothing or headbands. Integrated 'Smart' Headband: includes a microcontroller-based circuit for real-tim…	NO	NA	NA	NA	2021	Zhao, Chen; Li, Xiao; Wu, Qiyang; Liu, Xinyu	A thread-based wearable sweat nanobiosensor	Biosensors and Bioelectronics
KHLH2SEZ	10.1016/j.bios.2021.113650	https://linkinghub.elsevier.com/retrieve/pii/S0956566321006874	YES	wrist-worn		NO	non-invasive detection of transdermal volatile biomarkers to assess dietary macronutrient intake.	Optical	Optical	The transdermal acetone response from the GCAS sensor correlates well with breath acetone concentration in the range between 0 and 40 ppm and the correlation factor (R2) is as high as 0.8877.	Metabolic Syndrome	weight control, disease and nutrition management	-	-	-	skin gas													acetone, ammonia, hydrogen, CO2					1	4	Proof-of-concept/validation	Human	laboratory testing + human studies (preliminary)	NA	NA	Gradient-Based Colorimetric Array Sensor (GCAS): employs a novel chip with gradient sensing channels that detect volatile biomarkers via colorimetric changes proportional to biomarker concentration. Image-Based Signal Processing: uses a miniaturized imaging system with advanced algorithms to analyze real-time color changes, providing quantitative biomarker data. Porous Sensing Matrix: enhances se…	NO	NA	YES	NA	2022	Yu, Jingjing; Wang, Di; Tipparaju, Vishal Varun; Jung, Wonjong; Xian, Xiaojun	Detection of transdermal biomarkers using gradient-based colorimetric array sensor	Biosensors and Bioelectronics
JJGHS83P	10.1038/s41467-020-18238-6	https://www.ncbi.nlm.nih.gov/pubmed/32879320	YES	wrist-worn	smartwatch-like	NO	measuring of biomarkers in epidermally-retrievable biofluids	electrochemical	Electrochemical (Voltammetry)	The device's data based on a strong correlation with laboratory-based assays (R2 ≈ 0.94). The response of the glucose and lactate sensors were validated within the respective analytes’ physiologically relevant concentration range in sweat. Linear relationships were observed between the measured current responses and target analytes’ concentration levels (R2 = 0.99, for both sensors).		NA	yes	yes	-	sweat	saliva										yes		Acetaminophen	Acetaminophen				2	1	Validation	Human	Human studies	NA	NA	A wearable voltammetric sensor, using a surface-modified boron-doped diamond sensing interface to track the temporal profile of circulating acetaminophen in these fluids.	NO	NA	YES	NA	2020	Lin, H.; Tan, J.; Zhu, J.; Lin, S.; Zhao, Y.; Yu, W.; Hojaiji, H.; Wang, B.; Yang, S.; Cheng, X.; Wang, Z.; Tang, E.; Yeung, C.; Emaminejad, S.	A programmable epidermal microfluidic valving system for wearable biofluid management and contextual biomarker analysis	Nat Commun
MHBA7EZX	10.1073/pnas.2009979117	https://www.ncbi.nlm.nih.gov/pubmed/32719130	YES	wrist-worn	smartwatch-like	NO	therapeutic drug monitoring	electrochemical	Electrochemical (Voltammetry)	The study mentions that the sweat and saliva readings for acetaminophen, obtained using the device, were cross-validated with laboratory-based assays, achieving an R² value of approximately 0.94. This high correlation coefficient suggests a strong agreement between the device's measurements and established laboratory techniques, supporting the accuracy of the collected data.		NA	yes	yes	-	sweat	saliva (as control)										yes		Acetaminophen	Acetaminophen				2	1	Validation	Human	Human studies	NA	NA	A voltammetric sensing interface, featuring an “undistorted potential window,” within which the target electroactive drug’s voltammetric response is dominant and interference is eliminated, rendering reliable target quantification in noninvasively retrievable biofluids (sweat and saliva)	NO	NA	YES	NA	2020	Lin, S.; Yu, W.; Wang, B.; Zhao, Y.; En, K.; Zhu, J.; Cheng, X.; Zhou, C.; Lin, H.; Wang, Z.; Hojaiji, H.; Yeung, C.; Milla, C.; Davis, R. W.; Emaminejad, S.	Noninvasive wearable electroactive pharmaceutical monitoring for personalized therapeutics	Proc Natl Acad Sci U S A
KGA75EJM	10.1021/acssensors.8b00528	https://www.ncbi.nlm.nih.gov/pubmed/30095251	YES	skin-attached		NO	lithium drug monitoring	electrochemical	Electrochemical	The sensitivity of the watch-type sweat rate sensor is stated as 0.039 (pF/s)/(g/m2h).	Neuro	Lithium therapy	yes	-	yes	interstitial fluid	sweat												Li+					2	1	prototype	Human	Human studies	NA	NA	Miniaturized Thermo-Pneumatic Actuators.	NO	NA	NA	NA	2018	Sweilam, M. N.; Varcoe, J. R.; Crean, C.	Fabrication and Optimization of Fiber-Based Lithium Sensor: A Step toward Wearable Sensors for Lithium Drug Monitoring in Interstitial Fluid	ACS Sens
6T4KEKPL	10.1016/j.bios.2021.113764	https://linkinghub.elsevier.com/retrieve/pii/S0956566321008010	YES	wrist-worn	band	NO	detection and monitoring of phenylalanine (PHE) levels in biofluids	electrochemical	Electrochemical	In Buffer Solution: LOD = 3.0 μM In Diluted Saliva: LOD = 20.9 μM In Whole Saliva (using paper-based sampling): LOD = 39.8 μM In Serum: LOD = 114.2 μM	PKU	phenylketonuria (PKU) management	-	yes	-	saliva	serum										yes		Phenylalanine (PHE)	Phenylalanine (PHE)				2	1	Prototype/Validation		laboratory testing + in-vitro tests	NA	NA	Wearable Electrochemical Detection: successfully miniaturizes and integrates lab-grade electrochemical sensing components, like potentiostats and SPEs, into a compact wearable device, enabling real-time monitoring. Modified Screen-Printed Electrodes: utilizes a Nafion/NQS-modified membrane for phenylalanine detection, simplifying in-situ analysis by eliminating complex sample pre-treatment or enz…	NO	NA	NO	NA	2022	Parrilla, Marc; Vanhooydonck, Andres; Watts, Regan; De Wael, Karolien	Wearable wristband-based electrochemical sensor for the detection of phenylalanine in biofluids	Biosensors and Bioelectronics
IAKUZPEC	10.1002/smll.202205061	https://onlinelibrary.wiley.com/doi/10.1002/smll.202205061	YES	skin-attached		NO	real-time, in situ monitoring of multiple biomarkers in epidermal sweat and wound exudate.	electrochemical	Electrochemical	For Electrolyte Sensing (Na+, K+, and pH): The Na+ sensor exhibits a linear relationship between the open circuit potential (OCP) and the logarithm of Na+ concentration from 5 to 320 mM with a slope of 58.11 mV decade−1. The K+ sensor shows a linear relationship between the OCP and the logarithm of K+ concentration from 1 to 64 mM with a slope of 58.34 mV decade−1. The pH sensor demonstrates a li…	Hyperuricemia	hyperuricemia management and wound care	yes	-	-	sweat	wound exudate							yes			yes		Na+, K+, pH, Uric Acid (UA)	Na+, K+, pH, Uric Acid (UA)				2	4	Validation	Human	laboratory testing + human subject studies + animal models	NA	NA	Flexible and Skin-Conforming Design: incorporates PET and PI films for seamless wearability on diverse body locations, including forehead, forearm, and wounds. Advanced Microfluidic Module: enables efficient sampling, storage, and excretion of sweat and wound exudate, ensuring continuous delivery to the sensing module. Multiplexed Biomarker Sensing: simultaneously detects Na⁺, K⁺, pH, and uric ac…	NO	NA	NA	NA	2022	Pei, Xinyi; Sun, Mimi; Wang, Jingjuan; Bai, Jing; Bo, Xiangjie; Zhou, Ming	A Bifunctional Fully Integrated Wearable Tracker for Epidermal Sweat and Wound Exudate Multiple Biomarkers Monitoring	Small
JAXTNRXS	10.1038/s41551-021-00685-1	https://www.ncbi.nlm.nih.gov/pubmed/33589782	YES	patch	skin-attached	NO	monitoring of blood pressure and heart rate	electrochemical	Electrochemical	Glucose: The device successfully captured the physiological effects of food intake, specifically the production of glucose after digestion and its subsequent consumption via glycolysis. This indicates the glucose sensor's sensitivity to changes in glucose levels. Lactate: The device detected increases in lactate production during exercise, reflecting the body's response to oxygen depletion. This …		NA	yes	-	yes	interstitial fluid	sweat				yes	yes							glucose	Lactate, Caffeine, Alcohol				2	4	Validation	Human	Human studies	NA	NA	The device combines ultrasonic transducers for haemodynamic monitoring (blood pressure and heart rate) with electrochemical sensors for metabolic biomarker detection (glucose, lactate, caffeine, alcohol, pH, and Cl-)	NO	NA	NA	NA	2021	Sempionatto, J. R.; Lin, M.; Yin, L.; De la Paz, E.; Pei, K.; Sonsa-Ard, T.; de Loyola Silva, A. N.; Khorshed, A. A.; Zhang, F.; Tostado, N.; Xu, S.; Wang, J.	An epidermal patch for the simultaneous monitoring of haemodynamic and metabolic biomarkers	Nat Biomed Eng
V4DT66WY	10.1016/j.aca.2022.339518	https://linkinghub.elsevier.com/retrieve/pii/S0003267022000897	YES	skin-attached		NO	on-site monitoring of nickel levels in biological fluids	electrochemical	Electrochemical	The sensor exhibits a Nernstian response, meaning its potential difference changes linearly with the logarithm of the Ni(II) ion concentration. The reported slope value is 29.5 ± 0.09 mV decade-1. This indicates a highly sensitive response to changes in Ni(II) ion concentration. The sensor demonstrates a linear response over a wide concentration range of 1.0 × 10-5 to 1.0 × 10-1 mol L-1. This wid…		NA	yes	yes	-	sweat	saliva												Nickel (II) ions	Nickel (II) ions				2	1	Prototype/Validation		in-vitro tests + laboratory testing	NA	NA	The flexible Ni(II) ion sensor incorporates several cutting-edge innovations, including: - A novel, flexible, and highly porous substrate (AFCC-PNP) that enhances sensitivity, conductivity, and wearability. - The use of 2D Ni-MOF nanosheets as a highly sensitive and selective electroactive material. - Incorporation of antibacterial properties for safe handling in wearable applications. - A miniat…	NO	NA	NA	NA	2022	Elashery, Sally E.A.; Attia, Nour F.; Oh, Hyunchul	Design and fabrication of novel flexible sensor based on 2D Ni-MOF nanosheets as a preliminary step toward wearable sensor for onsite Ni (II) ions detection in biological and environmental samples	Analytica Chimica Acta
MQNLH9ID	10.1021/acsnano.6b04005	https://www.ncbi.nlm.nih.gov/pubmed/27380446	YES	skin-attached		NO	monitoring of ionized calcium and pH in body fluids	electrochemical	Electrochemical	The sensor shows fast response to changes in Ca2+ level with a 3.0% relative standard deviation (RSD) of sensitivity. Deviation due to potential drift is 0.7 mV/h which corresponds to 1.1% error in pH value over an hour of continuous measurement.	Metabolic Syndrome	Primary hyperparathyroidism and kidney stones.	yes	-	-	sweat	urine	tears									yes		Ionized Calcium, pH	Ionized Calcium, pH	Ionized Calcium, pH			3	2	prototype	Human	Human studies	NA	NA	The device features a disposable and flexible array of sensors specifically designed for detecting calcium and pH.	NO	NA	NA	NA	2016	Nyein, H. Y.; Gao, W.; Shahpar, Z.; Emaminejad, S.; Challa, S.; Chen, K.; Fahad, H. M.; Tai, L. C.; Ota, H.; Davis, R. W.; Javey, A.	A Wearable Electrochemical Platform for Noninvasive Simultaneous Monitoring of Ca(2+) and pH	ACS Nano
U3WC8QC6	10.1002/adma.202006444	https://onlinelibrary.wiley.com/doi/10.1002/adma.202006444	YES	skin-attached		NO	monitoring vitamin C levels in biofluids	electrochemical	Electrochemical	Sensitivity Variation: the researchers tested five different sensors to assess reproducibility. They found a sensitivity variation of approximately 12% for vitamin C concentrations ranging from 0 to 5000 µm. This suggests that different sensors might produce slightly different readings for the same concentration of vitamin C. Calibration for Accuracy: the authors acknowledge that the sensitivity …		NA	yes	-	-	sweat	urine	blood											Vitamin C	Vitamin C	Vitamin C			3	1	Prototype	Human	laboratory testing + in-vitro tests + human studies (preliminary).	NA	NA	Gold Nanodendrites: enhance sensitivity by increasing the electrode's surface area, improving electron transfer. Electroactive Conducting Polymer (PEDOT:LiClO4): improves electron transfer and electrochemical performance for better sensor functionality. Enzyme-Immobilized Membrane: ensures selectivity by using l-ascorbate oxidase to specifically detect vitamin C. Nafion Encapsulation: provides st…	NO	NA	NA	NA	2021	Zhao, Jiangqi; Nyein, Hnin Yin Yin; Hou, Lei; Lin, Yuanjing; Bariya, Mallika; Ahn, Christine Heera; Ji, Wenbo; Fan, Zhiyong; Javey, Ali	A Wearable Nutrition Tracker	Advanced Materials
8UP6AP3D	10.1016/j.bios.2019.03.053	https://linkinghub.elsevier.com/retrieve/pii/S0956566319302696	YES	skin-attached		NO	detection of cytokine levels	electrochemical	Electrochemical	IFN-γ: LOD of 476 × 10⁻¹⁵ m; IL-6: LOD of 608 × 10⁻¹⁵ m; TNF-α: LOD of 611 × 10⁻¹⁵ m. The results indicate high accuracy for all three cytokines across different biofluids: IFN-γ: Accuracy consistently above 95.48% in serum, saliva, and urine; TNF-α: Accuracy exceeding 95.2% in serum, saliva, and urine; IL-6: Accuracy greater than 95.8% in serum, saliva, and urine. The electrical properties of th…	Inflammation	cytokine storm syndrome (CSS) management	yes	yes	-	serum	saliva	urine	sweat										IFN-γ, TNF-α, IL-6	IFN-γ, TNF-α, IL-6	IFN-γ, TNF-α, IL-6	IFN-γ, TNF-α, IL-6		4	3	Validation		in-vitro tests	NA	NA	The aptameric DGTFET biosensing device features a dual-channel design to reduce interference by comparing a sensing channel (functionalized with aptamers) to a reference channel, enhancing accuracy in complex biofluids. TWEEN 80 passivation minimizes non-specific biomolecule adsorption, improving specificity. Aptamers for cytokines like IFN-γ, TNF-α, and IL-6 ensure highly sensitive and selective…	NO	NA	YES	NA	2019	Hao, Zhuang; Pan, Yunlu; Shao, Wenwen; Lin, Qiao; Zhao, Xuezeng	Graphene-based fully integrated portable nanosensing system for on-line detection of cytokine biomarkers in saliva	Biosensors and Bioelectronics
LMJIY823	10.1039/d0an00846j	https://www.ncbi.nlm.nih.gov/pubmed/32500895	YES	only for sweat from skin surface		NO	detection of psychoactive substances within biological fluids	Other	Electrochemiluminescence (ECL)	The sensor demonstrated a Limit of Detection (LOD) of 0.1 µM in human pooled serum. In artificial saliva, the LOD was approximately 1 µM. In artificial sweat, a concentration of 1 µM scopolamine yielded a signal 3.4 times greater than the blank matrix signal, allowing for clear differentiation. The sensor was also tested by collecting sweat from synthetic skin spiked with scopolamine, resulting i…		NA	yes	yes	-	Human pooled serum	Urine	artificial saliva	sweat	sweat collected from the skin's surface									scopolamine	scopolamine	scopolamine	scopolamine		5	1	Proof-of-concept	Human	Human studies	NA	NA	The core technology of the sensor relies on electrochemiluminescence, a process where light emission is triggered by an electrochemical reaction. While ECL itself is not a brand-new concept, its application in sensor development for psychoactive substances in biological matrices represents a potentially novel approach.	NO	NA	NA	NA	2020	Brown, K.; Jacquet, C.; Biscay, J.; Allan, P.; Dennany, L.	Electrochemiluminescent sensors as a screening strategy for psychoactive substances within biological matrices	Analyst
3XC7JRTS	10.3390/s20071904	http://www.ncbi.nlm.nih.gov/pubmed/32235429	YES	textile		NO	Measuring relative humidity (RH) changes in real-time during sports activities (NO MOLECULAR/IONIC BIOMARKERS)	Optical	Optical				-	-	-																															2020	He, Chenyang; Korposh, Serhiy; Hernandez, Francisco Ulises; Liu, Liangliang; Correia, Ricardo; Hayes-Gill, Barrie R.; Morgan, Stephen P.	Real-Time Humidity Measurement during Sports Activity using Optical Fibre Sensing	Sensors (Basel, Switzerland)
D3ZYCFEH	10.2196/17326	https://www.ncbi.nlm.nih.gov/pubmed/32432552	YES	ECG device		NO	CARDIOVASCULAR MONITORING (NO MOLECULAR/IONIC BIOMARKERS)	Electrical	Electrode-Based Sensing (ECG technology)				-	-	-																															2020	De Canniere, H.; Smeets, C. J. P.; Schoutteten, M.; Varon, C.; Van Hoof, C.; Van Huffel, S.; Groenendaal, W.; Vandervoort, P.	Using Biosensors and Digital Biomarkers to Assess Response to Cardiac Rehabilitation: Observational Study	J Med Internet Res
DLES74LR	10.1038/s41598-018-19239-8	https://www.ncbi.nlm.nih.gov/pubmed/29352237	YES	wrist-worn		NO	monitor human thermal comfort (NO MOLECULAR/IONIC BIOMARKERS)						-	-	-																															2018	Sim, J. K.; Yoon, S.; Cho, Y. H.	Wearable Sweat Rate Sensors for Human Thermal Comfort Monitoring	Sci Rep
I39HDFH6	10.3390/molecules26123570	http://www.ncbi.nlm.nih.gov/pubmed/34208039	YES	textile		NO	Personal thermal management (NO MOLECULAR/IONIC BIOMARKERS)						-	-	-																															2021	Gorji, Mohsen; Mazinani, Saeedeh; Faramarzi, Abdol-Rahim; Ghadimi, Saeedeh; Kalaee, Mohammadreza; Sadeghianmaryan, Ali; Wilson, Lee D.	Coating Cellulosic Material with Ag Nanowires to Fabricate Wearable IR-Reflective Device for Personal Thermal Management: The Role of Coating Method and Loading Level	Molecules (Basel, Switzerland)
E7DJX78A	10.1038/s41467-018-06759-0	http://www.ncbi.nlm.nih.gov/pubmed/30323200	YES	textile	skin-touch-actuated	NO	HARVESTING MECHANICAL ENERGY (NO MOLECULAR/IONIC BIOMARKERS)						-	-	-																															2018	Xiong, Jiaqing; Cui, Peng; Chen, Xiaoliang; Wang, Jiangxin; Parida, Kaushik; Lin, Meng-Fang; Lee, Pooi See	Skin-touch-actuated textile-based triboelectric nanogenerator with black phosphorus for durable biomechanical energy harvesting	Nature Communications
P3PIP8LX	10.1016/j.jcis.2022.10.129	https://linkinghub.elsevier.com/retrieve/pii/S0021979722018999	YES	skin-attached		NO	triboelectric nanogenerator (TENG) for energy harvesting from human motion (NO MOLECULAR/IONIC BIOMARKERS)	electrochemical	Electrochemical			NA	yes	-	-	sweat																							NA	NA		NO	NA	YES	NA	2023	Cheng, Kuan; Huang, Zixu; Wang, Pengcheng; Sun, Li; Ghasemi, Hadi; Ardebili, Haleh; Karim, Alamgir	Antibacterial flexible triboelectric nanogenerator via capillary force lithography	Journal of Colloid and Interface Science
E4SGQ7AY	10.1109/JTEHM.2022.3175361	https://www.ncbi.nlm.nih.gov/pubmed/35711336	YES	skin-attached		NO	HEART-RATE EVALUATION (NO MOLECULAR/IONIC BIOMARKERS)					NA	-	-	-																								NA	NA		NO	NA	NA	NA	2022	Alharbi, E. A.; Jones, J. M.; Alomainy, A.	Non-Invasive Solutions to Identify Distinctions Between Healthy and Mild Cognitive Impairments Participants	IEEE J Transl Eng Health Med
FLFTAIIX	10.2196/60925	https://formative.jmir.org/2024/1/e60925	YES	wrist-worn		NO	Monitoring nocturnal heart rate and sleep. The device discussed in the sources does not analyze any fluids to detect biomarkers. This device uses photoplethysmography (PPG) to track metrics like heart rate and sleep. The study also investigated the use of saliva and sweat to detect biomarkers, but these fluids were analyzed independently and not using the ŌURA ring.						-	-	-																															2024	Pojednic, Rachele; Welch, Amy; Thornton, Margaret; Garvey, Meghan; Grogan, Tara; Roberts, Walter; Ash, Garrett	Intensive, Real-Time Data Collection of Psychological and Physiological Stress During a 96-Hour Field Training Exercise at a Senior Military College: Feasibility and Acceptability Cohort Study	JMIR Formative Research
GFEL8UXX	10.1038/s41598-023-40339-7	https://www.ncbi.nlm.nih.gov/pubmed/37591885	YES	wrist-worn	smartwatch-like	NO	monitoring of human skin hydration and body sweat loss (NO MOLECULAR/IONIC BIOMARKERS)						-	-	-																															2023	Volkova, E.; Perchik, A.; Pavlov, K.; Nikolaev, E.; Ayuev, A.; Park, J.; Chang, N.; Lee, W.; Kim, J. Y.; Doronin, A.; Vilenskii, M.	Multispectral sensor fusion in SmartWatch for in situ continuous monitoring of human skin hydration and body sweat loss	Sci Rep
8P7PUXU6	10.3390/s21144934	http://www.ncbi.nlm.nih.gov/pubmed/34300678	YES	textile		NO	SMART SENSING TECHNOLOGY (NO MOLECULAR/IONIC BIOMARKERS)						-	-	-																															2021	Ibanez Labiano, Isidoro; Arslan, Dilan; Ozden Yenigun, Elif; Asadi, Amir; Cebeci, Hulya; Alomainy, Akram	Screen Printing Carbon Nanotubes Textiles Antennas for Smart Wearables	Sensors (Basel, Switzerland)
3FBMHT9N	10.1007/s10916-021-01709-8	http://www.ncbi.nlm.nih.gov/pubmed/33608815	YES	textile		NO	MONITORING HUMAN BODY MOVEMENT (NO MOLECULAR/IONIC BIOMARKERS)						-	-	-																															2021	Kang, Da-Hye; Lee, Joo-Hyeon; Lee, Jeong-Whan; Cho, Hyun-Seung; Park, Seon-Hyung; Lee, Kang-Hwi; Kang, Seung-Jin	Conditions for CNT - Coated Textile Sensors Applied to Wearable Platforms to Monitor Limb Joint Motion	Journal of Medical Systems
98HS67W5	10.3390/s21124038	http://www.ncbi.nlm.nih.gov/pubmed/34208280	YES	textile		NO	TEXTILE CHARACTERIZATION (NO MOLECULAR/IONIC BIOMARKERS)						-	-	-																															2021	Tabaczyńska, Agnieszka; Dąbrowska, Anna; Słoma, Marcin	Printed Graphene, Nanotubes and Silver Electrodes Comparison for Textile and Structural Electronics Applications	Sensors (Basel, Switzerland)
GCB7UWKY	10.1038/s41467-021-25075-8	https://www.ncbi.nlm.nih.gov/pubmed/34385436	YES	textile		NO	TEXTILE CHARACTERIZATION (NO MOLECULAR/IONIC BIOMARKERS)						-	-	-																															2021	Yang, Y.; Wei, X.; Zhang, N.; Zheng, J.; Chen, X.; Wen, Q.; Luo, X.; Lee, C. Y.; Liu, X.; Zhang, X.; Chen, J.; Tao, C.; Zhang, W.; Fan, X.	A non-printed integrated-circuit textile for wireless theranostics	Nat Commun
8ANCTSZH	10.1039/d2lc00670g	https://www.ncbi.nlm.nih.gov/pubmed/36268642	YES	skin-attached		NO	autonomous and continuous monitoring of sweat rate (NO MOLECULAR/IONIC BIOMARKERS)						-	-	-																															2022	Lin, H.; Yu, W.; Suarez, J. E. D.; Athavan, H.; Wang, Y.; Yeung, C.; Lin, S.; Sankararaman, S.; Milla, C.; Emaminejad, S.	Autonomous wearable sweat rate monitoring based on digitized microbubble detection	Lab Chip
CZKK3ZHM	10.1038/s41598-022-18271-z	https://www.ncbi.nlm.nih.gov/pubmed/36064877	YES	skin-attached		NO	A biosensor to measure physiological signals related to epileptic seizures. The device monitors electrodermal activity (EDA), peripheral body temperature (TEMP), and heart rate (HR) (NO MOLECULAR/IONIC BIOMARKERS)						-	-	-																															2022	Vieluf, S.; El Atrache, R.; Cantley, S.; Jackson, M.; Clark, J.; Sheehan, T.; Bosl, W. J.; Zhang, B.; Loddenkemper, T.	Seizure-related differences in biosignal 24-h modulation patterns	Sci Rep
3S6SVEZA	10.1039/d3lc00109a	https://www.ncbi.nlm.nih.gov/pubmed/37043225	YES	skin-attached		NO	a versatile artificial skin platform that recapitulates skin topography, active sweat pores, skin wetting behaviour and sweat rate, and that can be tuned to mimic the specifications of the targeted body location and sweating characteristics (NO MOLECULAR/IONIC BIOMARKERS).					NA	yes	-	-	sweat																							NA	NA		NO	NA	NA	NA	2023	Moonen, E. J. M.; Ul Islam, T.; van Kemenade, S.; Pelssers, E.; Heikenfeld, J.; den Toonder, J. M. J.	A versatile artificial skin platform for sweat sensor development	Lab Chip
6WGJ6W6Y	10.1016/j.jcis.2022.07.011	https://linkinghub.elsevier.com/retrieve/pii/S002197972201181X	YES	patch		NO	non-woven fabric treated with silver nanoplates (NO MOLECULAR/IONIC BIOMARKERS)						-	-	-																															2022	Jiang, Shan; Cui, Ce; Bai, Wenhao; Wang, Weijie; Ren, Erhui; Xiao, Hongyan; Zhou, Mi; Cheng, Cheng; Guo, Ronghui	Shape-controlled silver nanoplates colored fabric with tunable colors, photothermal antibacterial and colorimetric detection of hydrogen sulfide	Journal of Colloid and Interface Science
XRUPNCGR	10.3390/s24144710	https://www.ncbi.nlm.nih.gov/pubmed/39066108	YES	skin-attached		NO	measuring digital biomarkers like muscle oxygen levels and heart rate (NO MOLECULAR/IONIC BIOMARKERS)					NA	yes	-	-	sweat																							NA	NA		NO	NA			2024	Gorti, B.; Stephenson, C.; Sethi, M.; Gross, K.; Ramos, M.; Seshadri, D.; Drummond, C. K.	Overarm Training Tolerance: A Pilot Study on the Use of Muscle Oxygen Saturation as a Biomarker	Sensors (Basel)
QDDWUY8Z	10.1016/j.jcis.2020.08.037	https://linkinghub.elsevier.com/retrieve/pii/S0021979720310808	YES	skin-attached		NO	multifunctional fabric (NO MOLECULAR/IONIC BIOMARKERS)						-	-	-																															2021	Gao, Ya-Nan; Wang, Ye; Yue, Tian-Ning; Weng, Yun-Xuan; Wang, Ming	Multifunctional cotton non-woven fabrics coated with silver nanoparticles and polymers for antibacterial, superhydrophobic and high performance microwave shielding	Journal of Colloid and Interface Science
NPH2WXUI	10.3390/s16111833	https://www.ncbi.nlm.nih.gov/pubmed/27809270	YES	skin-attached		NO	MONITORING HEART RATE (NO MOLECULAR/IONIC BIOMARKERS)						-	-	-																															2016	Lou, C.; Li, R.; Li, Z.; Liang, T.; Wei, Z.; Run, M.; Yan, X.; Liu, X.	Flexible Graphene Electrodes for Prolonged Dynamic ECG Monitoring	Sensors (Basel)
5QIYN8EM	10.1152/ajpregu.00192.2021	https://www.ncbi.nlm.nih.gov/pubmed/34843411	YES	head-mounted		NO	monitoring oxygenated haemoglobin (Oxy-Hb) levels as an indicator of brain activity (NO MOLECULAR/IONIC BIOMARKERS)						-	-	-																															2022	Asahara, R.; Ishii, K.; Liang, N.; Hatanaka, Y.; Hihara, K.; Matsukawa, K.	Regional difference in prefrontal oxygenation before and during overground walking in humans: a wearable multichannel NIRS study	Am J Physiol Regul Integr Comp Physiol
[truncated: 5 more columns]
